# Supplementary material for: A two-step Kinugasa/Conia-ene-type sequential reaction for the asymmetric synthesis of 8-methylene-2,6-diazaspiro[3.4]octane-1,5-diones
Source: Royal Society of Chemistry journal article supplement (doi:10.1039/d4qo01388c), 2024-10-28
Supplement: d4qo01388c1.pdf [file d4qo01388c1.pdf]

## Supporting Information

### **A Two-Step Kinugasa/Conia-Ene-Type Sequential Reaction for Asymmetric Synthesis of 8-Methylene-2,6-diaza-spiro [3.4]octane-1,5-diones**

Shanyue Li,<sup>a,b</sup> Qicai Ma,<sup>a</sup> Bohua Wu,<sup>a,b</sup> Haowen Ma,<sup>b</sup> Wei Zhou\*<sup>a</sup> and Qian Cai\*<sup>a,b</sup>

<sup>a</sup> College of Pharmacy, Jinan University, No. 601 Huangpu Avenue West, Guangzhou, 510632, P. R. China.

<sup>b</sup> College of Chemistry and Materials Science, Zhejiang Normal University, No. 688 Yingbin Road, Jinhua, Zhejiang Province, 321004, R. R. China.

E-mails: weizhou88@jnu.edu.cn; caiqian@zjnu.edu.cn

### Table of Contents

|             |                                                         |           |
|-------------|---------------------------------------------------------|-----------|
| <b>I.</b>   | <b>General Remarks.....</b>                             | <b>2</b>  |
| <b>II.</b>  | <b>Synthesis of Substrates.....</b>                     | <b>2</b>  |
| <b>III.</b> | <b>The Two-Step Sequential Reaction.....</b>            | <b>3</b>  |
| <b>IV.</b>  | <b>Synthetic Transformations.....</b>                   | <b>20</b> |
| <b>V.</b>   | <b>X-Ray Crystallographic Data of 3aa and 3aa'.....</b> | <b>22</b> |
| <b>VI.</b>  | <b>NMR and HPLC Spectra .....</b>                       | <b>26</b> |

## I. General Remarks

$^1\text{H}$  NMR and  $^{13}\text{C}$  NMR spectra were recorded on a Bruker AVANCE III HD 400 MHz spectrometer. Chemical shifts ( $\delta$ ) are given in relative to tetramethylsilane ( $\delta$  0.00 ppm) in  $\text{CDCl}_3$ . Coupling constants,  $J$ , were reported in hertz unit (Hz). High resolution mass spectra (HRMS) were obtained on a High Resolution Orbitrap Mass Spectrometer. Chemical names were generated using Cambridge Soft ChemDraw 16.0. Optical rotations were measured on a Jasco, P-2000 Automatic Digital Polarimeter. Enantiomeric ratios were determined by chiral HPLC using a chiralpak AD-H (Amylose tris (3,5-dimethylphenylcarbamate) coated on 5  $\mu\text{m}$  silica-gel), chiralpak AS-H (Amylose tris-[(S)- $\alpha$ -methylbenzylcarbamate] coated on 5  $\mu\text{m}$  silica-gel), chiralpak AS (Amylose tris-[(S)- $\alpha$ -methylbenzylcarbamate] coated on 10  $\mu\text{m}$  silica-gel) with hexane and *i*-PrOH as solvents. Commercially obtained reagents were used without further purification.

## II. Synthesis of Substrates

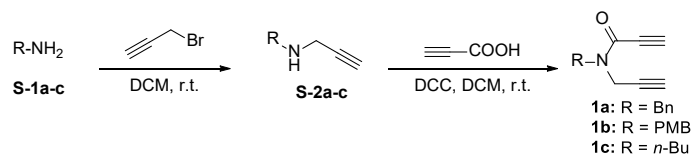

3-Bromoprop-1-yne (2.33 mL, 24.0 mmol, 1.0 equiv) was slowly added to a solution of benzylamine (**S-1a**, 13.15 g, 96.0 mmol, 4 equiv) in dichloromethane (100 mL) at room temperature. The mixture was stirred for 12 h before the reaction was completed. The mixture was filtrated, and the filtrate was evaporated in vacuo. The residue was purified by flash chromatography (ethyl acetate/petroleum ether = 1/10) to afford **S-2a** (2.55g, 61% yield) as a yellow transparent liquid. Next, the mixture of **S-2a** (14.6 mmol, 2.55 g, 1.0 equiv), propiolic acid (16.1 mmol, 1.12 g, 1.1 equiv) and DCC (16.1 mmol, 3.32 g, 1.1 equiv) in DCM (100 mL) were stirred at room temperature for 6 hours. After the reaction was completed, the mixture was filtrated, and solvent was removed in vacuum. The residue was purified by flash chromatography (ethyl acetate/petroleum ether = 1/5) to afford compound **1a** as a yellow transparent liquid (2.1g, 73% yield).  $^1\text{H}$  NMR (400 MHz,  $\text{CDCl}_3$ , two rotamers)  $\delta$  7.28-7.38 (m, 5H), 4.93 & 4.74 (2s, 2H), 4.27 & 4.12 (2d,  $J$  = 2.4 Hz, 2H), 3.25 & 3.24 (2s, 1H), 2.37 & 2.27 (2t,  $J$  = 2.4Hz, 1H);

$^{13}\text{C}$  NMR (100MHz,  $\text{CDCl}_3$ , two rotamers)  $\delta$  153.1, 153.0, 135.4, 135.2, 129.0, 128.8, 128.6, 128.3, 128.0, 127.9, 80.2, 80.0, 77.4, 75.4, 75.1, 73.6, 72.8, 51.4, 46.6, 37.5, 32.4; HRMS (ESI) calcd. for  $\text{C}_{13}\text{H}_{12}\text{NO}^+$  ( $\text{M} + \text{H}$ ) $^+$  198.0919, found 198.0912.

### *N*-(4-methoxybenzyl)-*N*-(prop-2-yn-1-yl)propiolamide (**1b**)

Substrates **1b** was synthesized via similar procedure of **1a**. The product was purified by column chromatography (ethyl acetate/petroleum ether = 1:10). 2.6 g, 78%, yellow transparent liquid.  $^1\text{H}$  NMR (400 MHz,  $\text{CDCl}_3$ , two rotamers)  $\delta$  7.18-7.23 (m, 2H), 6.87 & 6.84 (2d,  $J = 8.4$  Hz, 2H), 4.84 & 4.64 (2s, 2H), 4.22 & 4.07 (2d,  $J = 2.4$  Hz, 2H), 3.78 & 3.76 (2s, 3H), 3.23 & 3.21 (2s, 1H), 2.34 & 2.24 (2t,  $J = 2.4$  Hz, 1H);  $^{13}\text{C}$  NMR (100 MHz,  $\text{CDCl}_3$ , two rotamers)  $\delta$  159.6, 159.4, 152.9, 152.8, 130.1, 129.3, 127.4, 127.0, 114.3, 114.2, 79.9, 79.9, 77.5, 75.5, 75.2, 73.4, 72.7, 55.3, 55.3, 50.8, 46.0, 37.3, 32.1; HRMS (ESI) calcd. for  $\text{C}_{14}\text{H}_{14}\text{NO}_2^+$  ( $\text{M} + \text{H}$ ) $^+$  228.1025, found 228.1019.

### *N*-butyl-*N*-(prop-2-yn-1-yl)propiolamide (**1c**)

Substrates **1c** was synthesized via similar procedure of **1a**. The product was purified by column chromatography (ethyl acetate/petroleum ether = 1:10). 1.27g, 53%, yellow transparent liquid.  $^1\text{H}$  NMR (400 MHz,  $\text{CDCl}_3$ , two rotamers)  $\delta$  4.37 & 4.22 (2d,  $J = 2.4$ Hz, 2H), 3.70 & 3.50 (2t,  $J = 7.6$  Hz, 2H), 3.18 & 3.14 (2s, 1H), 2.32 & 2.24 (2t,  $J = 2.4$ Hz, 1H), 1.56-1.71 (m, 2H), 1.25-1.39 (m, 2H), 0.91-0.98 (m, 3H);  $^{13}\text{C}$  NMR (100 MHz,  $\text{CDCl}_3$ , two rotamers)  $\delta$  153.1, 152.9, 79.3, 79.1, 77.8, 77.8, 75.5, 75.4, 72.9, 72.3, 48.2, 44.3, 38.6, 33.4, 30.3, 29.0, 20.0, 19.7, 13.8, 13.7; HRMS (ESI) calcd. for  $\text{C}_{10}\text{H}_{14}\text{NO}^+$  ( $\text{M} + \text{H}$ ) $^+$  164.1075, found 164.1070.

## III. The Two-Step Sequential Reaction

**Supplementary Table 1:** Screening of the reaction conditions. <sup>a</sup>

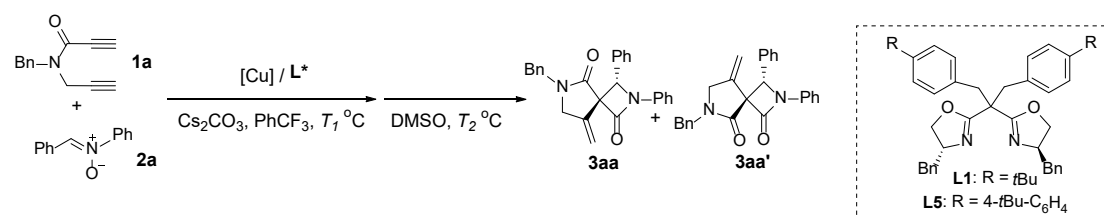

| Entry          | L* | [Cu]                                                | Cs <sub>2</sub> CO <sub>3</sub> (eq.) | T <sub>1</sub> / T <sub>2</sub> (°C) | yield (%) <sup>b</sup> | e.r. <sup>c</sup><br>( <b>3aa</b> ) | <b>3aa</b> / <b>3aa'</b> <sup>d</sup> |
|----------------|----|-----------------------------------------------------|---------------------------------------|--------------------------------------|------------------------|-------------------------------------|---------------------------------------|
| 1              | L1 | Cu(CH <sub>3</sub> CN) <sub>4</sub> BF <sub>4</sub> | 3.0                                   | -10 / 60 °C                          | 41                     | 83:17                               | 4.5:1                                 |
| 2              | L1 | CuCl                                                | 3.0                                   | -10 / 60 °C                          | 43                     | 76:24                               | 5:1                                   |
| 3              | L1 | CuOTf                                               | 3.0                                   | -10 / 60 °C                          | 35                     | 85.5:15.5                           | 6:1                                   |
| 4              | L1 | Cu(MeCN) <sub>4</sub> PF <sub>6</sub>               | 3.0                                   | -10 / 60 °C                          | 49                     | 90.5:9.5                            | 7:1                                   |
| 5              | L5 | Cu(CH <sub>3</sub> CN) <sub>4</sub> PF <sub>6</sub> | 3.0                                   | -10 / 60 °C                          | 53                     | 94:6                                | 7:1                                   |
| 6              | L5 | Cu(CH <sub>3</sub> CN) <sub>4</sub> PF <sub>6</sub> | 3.0                                   | -20 / 60 °C                          | 35                     | 94:6                                | 7:1                                   |
| 7 <sup>e</sup> | L5 | Cu(CH <sub>3</sub> CN) <sub>4</sub> PF <sub>6</sub> | 3.0                                   | -10 / 60 °C                          | 53                     | 94:6                                | 6:1                                   |
| 8 <sup>f</sup> | L5 | Cu(CH <sub>3</sub> CN) <sub>4</sub> PF <sub>6</sub> | 3.0                                   | -10 / 60 °C                          | 50                     | 87.5:12.5                           | 7:1                                   |
| 9              | L5 | Cu(CH <sub>3</sub> CN) <sub>4</sub> PF <sub>6</sub> | 2.5                                   | -10 / 60 °C                          | 46                     | 94:6                                | 7:1                                   |
| 10             | L5 | Cu(CH <sub>3</sub> CN) <sub>4</sub> PF <sub>6</sub> | 3.5                                   | -10 / 60 °C                          | 50                     | 94:9                                | 7:1                                   |

<sup>[a]</sup> **1a** (0.2 mmol), **2a** (0.24 mmol), copper catalyst (10 mol%), ligand (12 mol%), Cs<sub>2</sub>CO<sub>3</sub> (0.6 mmol), PhCF<sub>3</sub> (2 mL), -10 °C for 6 h, then in DMSO (2 mL), 60 °C for 6 h. <sup>[b]</sup> Isolated yields. <sup>[c]</sup> Determined by HPLC analysis. <sup>[d]</sup> Determined by <sup>1</sup>H NMR analysis of the crude reaction mixture. <sup>[e]</sup> L5 (20 mol%), Cu(MeCN)<sub>4</sub>PF<sub>6</sub> (20 mol%). <sup>[f]</sup> L5 (6 mol%), Cu(MeCN)<sub>4</sub>PF<sub>6</sub> (5 mol%) .

### General procedure:

A mixture of propiolamide **1a** (0.20 mmol, 1.0 equiv.), nitrone **2a** (0.24 mmol, 1.2 equiv.), Cs<sub>2</sub>CO<sub>3</sub> (0.6 mmol, 195.2 mg, 3.0 equiv.), Cu(CH<sub>3</sub>CN)<sub>4</sub>PF<sub>6</sub> (0.02 mmol, 7.5 mg, 10 mol%) with chiral ligand **L5** (0.024 mmol, 18.7 mg, 12 mol%) in 2 mL dry PhCF<sub>3</sub> was stirred at -10 °C for 6 hours under the atmosphere of argon. Then DMSO (2 mL) was added, and the mixture was stirred at 60 °C for another 6 hours. After the reaction was completed (monitored by TLC), H<sub>2</sub>O (5.0 mL) and ethyl acetate (5.0 mL) were added into the mixture. The organic phase was separated, and the aqueous phase was extracted with ethyl acetate (5.0 mL × 3). The combined organic phase was washed with H<sub>2</sub>O and brine, dried over Na<sub>2</sub>SO<sub>4</sub>. The solvent was removed under reduced pressure. The residue was purified by flash chromatography (ethyl acetate/petroleum ether = 1/5~1/3) to afford the desired products **3aa**.

Other products were prepared according to the similar procedures.

### (3S,4S)-6-benzyl-8-methylene-2,3-diphenyl-2,6-diazaspiro[3.4]octane-1,5-dione (**3aa**)

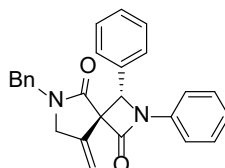

The product was purified by silica gel column chromatography (ethyl acetate/petroleum ether = 1:5), 41.8 mg, 53%, white solid.  $^1\text{H}$  NMR (400 MHz,  $\text{CDCl}_3$ )  $\delta$  7.38-7.41 (m, 7H), 7.31-7.35 (m, 2H), 7.25-7.28 (m, 3H), 7.14 (t,  $J = 7.2$  Hz, 1H), 6.86-6.88 (m, 2H), 5.50 (s, 1H), 5.42 (s, 1H), 5.17 (s, 1H), 4.68 (d,  $J = 14.4$  Hz, 1H), 3.99 (d,  $J = 14.4$  Hz, 1H), 3.92 (d,  $J = 14.4$  Hz, 1H), 3.88 (d,  $J = 14.4$  Hz, 1H);  $^{13}\text{C}$  NMR (100 MHz,  $\text{CDCl}_3$ )  $\delta$  166.5, 162.4, 138.2, 137.1, 135.5, 132.4, 129.2, 128.9, 128.7, 128.3, 128.0, 127.7, 127.6, 124.5, 117.7, 112.1, 70.2, 69.4, 50.2, 46.5; HRMS (ESI) calcd. for  $\text{C}_{26}\text{H}_{22}\text{N}_2\text{O}_2^+$  ( $\text{M} + \text{H}$ ) $^+$  395.1760, found 395.1758; HPLC (AS-H, *n*-hexane/*i*-PrOH = 80:20, flow rate = 1.0 mL/min, I = 254 nm)  $\tau_{\text{major}} = 10.5$  min,  $\tau_{\text{minor}} = 8.8$  min;  $[\alpha]_{\text{D}}^{25} -122.6$  (c 1.0,  $\text{CHCl}_3$ , 94:6 er).

**(3*S*,4*R*)-6-benzyl-8-methylene-2,3-diphenyl-2,6-diazaspiro[3.4]octane-1,5-dione (3aa')**

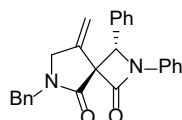

The product was purified by silica gel column chromatography (ethyl acetate/petroleum ether = 1:5). white solid,  $^1\text{H}$  NMR (400 MHz,  $\text{CDCl}_3$ )  $\delta$  7.36-7.41 (m, 4H), 7.34 - 7.26 (m, 8H), 7.15 - 7.10 (m, 3H), 5.62 (s, 1H), 4.99 (s, 1H), 4.81 (s, 1H), 4.65 (d,  $J = 14.8$  Hz, 1H), 4.55 (d,  $J = 14.8$  Hz, 1H), 3.77 (d,  $J = 13.6$  Hz, 1H), 3.59 (d,  $J = 13.6$  Hz, 1H);  $^{13}\text{C}$  NMR (100 MHz,  $\text{CDCl}_3$ )  $\delta$  169.5, 162.1, 137.1, 135.4, 133.5, 133.0, 129.1, 129.0, 128.8, 128.5, 128.2, 128.0, 126.9, 124.5, 117.7, 115.5, 70.1, 64.4, 50.6, 47.0; HRMS (ESI) calcd. for  $\text{C}_{26}\text{H}_{22}\text{N}_2\text{O}_2^+$  ( $\text{M} + \text{H}$ ) $^+$  395.1760, found 395.1758; HPLC (AS-H, *n*-hexane/*i*-PrOH = 80:20, flow rate = 1.0 mL/min, I = 254 nm)  $\tau_{\text{major}} = 8.5$  min,  $\tau_{\text{minor}} = 9.9$  min;  $[\alpha]_{\text{D}}^{25} -95.7$  (c 1.0,  $\text{CHCl}_3$ , 94:6 er).

**(3*S*,4*S*)-6-(4-methoxybenzyl)-8-methylene-2,3-diphenyl-2,6 diazaspiro[3.4]octane-1,5-dione (3ba)**

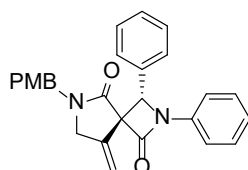

The product was purified by silica gel column chromatography (ethyl acetate/petroleum ether = 1:3). 41.6 mg, 49%, white solid.  $^1\text{H}$  NMR (400 MHz,  $\text{CDCl}_3$ )  $\delta$  7.31-7.37 (m, 7H), 7.28-7.30 (m, 2H), 7.11 (t,  $J = 7.2$  Hz, 1H), 6.76-6.90 (m, 4H), 5.46 (s, 1H), 5.38 (s, 1H), 5.12 (s, 1H), 4.57 (d,  $J = 14.6$  Hz, 1H), 3.92 (d,  $J = 14.6$  Hz, 1H), 3.85 (s, 2H), 3.79 (s, 3H);  $^{13}\text{C}$  NMR (100 MHz,  $\text{CDCl}_3$ )  $\delta$  166.3, 162.4, 159.1, 138.3, 137.1, 132.5, 129.4, 129.1, 128.8, 128.3, 127.6, 127.6, 124.4, 117.7, 114.0, 112.0, 70.2, 69.3, 55.3, 50.0, 45.8; HRMS (ESI) calcd. for  $\text{C}_{27}\text{H}_{24}\text{N}_2\text{O}_3^+$  ( $\text{M} + \text{H}$ ) $^+$  425.1865, found 425.1859; HPLC (AS-H, *n*-hexane/*i*-PrOH = 80:20, flow rate = 1.0 mL/min, I = 254 nm)  $\tau_{\text{major}} = 15.2$  min,  $\tau_{\text{minor}} = 10.6$  min;  $[\alpha]_{\text{D}}^{25} -135.4$  (c 1.0,  $\text{CHCl}_3$ , 95.5, 4.5 er).

**(3*S*,4*S*)-6-butyl-8-methylene-2,3-diphenyl-2,6-diazaspiro[3.4]octane-1,5-dione (3ca)**

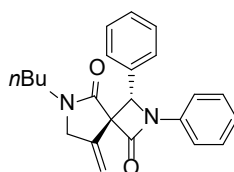

The product was purified by silica gel column chromatography (ethyl acetate/petroleum ether = 1:5). 30.3 mg, 42%, white solid.  $^1\text{H}$  NMR (400 MHz,  $\text{CDCl}_3$ )  $\delta$  7.37 - 7.29 (m, 9H), 7.10 (t,  $J = 7.2$  Hz, 1H), 5.48 (s, 1H), 5.44 (s, 1H), 5.12 (s, 1H), 4.06 (d,  $J = 14.0$  Hz, 1H), 3.95 (d,  $J = 14.0$  Hz, 1H), 3.27-3.34 (m, 1H), 2.93-3.03 (m, 1H), 1.24-1.29 (m, 2H), 1.00-1.06 (m, 2H), 0.77 (t,  $J = 7.2$  Hz, 3H);  $^{13}\text{C}$  NMR (100 MHz,  $\text{CDCl}_3$ )  $\delta$  166.2, 162.6, 138.6, 137.1, 132.5, 129.1, 128.7, 128.2, 127.4, 124.4, 117.6, 111.7, 70.2, 69.1, 50.6, 42.1, 28.9, 19.5, 13.6; HRMS (ESI) calcd. for  $\text{C}_{23}\text{H}_{25}\text{N}_2\text{O}_2^+$  ( $\text{M} + \text{H}$ ) $^+$  361.1916, found 361.1911; HPLC (AS-H, *n*-hexane/*i*-PrOH = 80:20, flow rate = 1.0 mL/min, I = 254 nm)  $\tau_{\text{major}} = 6.7$  min,  $\tau_{\text{minor}} = 5.8$  min;  $[\alpha]_{\text{D}}^{25} -97.8$  (c 1.0,  $\text{CHCl}_3$ , 88:12 er).

**(3*S*,4*S*)-6-(4-methoxybenzyl)-8-methylene-2-phenyl-3-(*p*-tolyl)-2,6diazaspiro[3.4]octane-1,5-dione (3bb)**

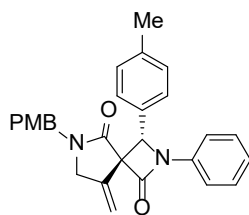

The product was purified by silica gel column chromatography (ethyl acetate/petroleum ether = 1:5). 44.7 mg, 51%, white solid.  $^1\text{H}$  NMR (400 MHz,  $\text{CDCl}_3$ )  $\delta$  7.39 (d,  $J = 7.8$  Hz, 2H), 7.28-7.34 (m, 3H), 7.27 (s, 1H), 7.20 (d,  $J = 8.0$  Hz, 2H), 7.13 (t,  $J = 7.6$  Hz, 1H), 6.76-6.82 (m, 4H), 5.47 (s, 1H), 5.39 (s, 1H), 5.11 (s, 1H), 4.58 (d,  $J = 14.6$  Hz, 1H), 3.98 (d,  $J = 14.6$  Hz, 1H), 3.88 (d,  $J = 14.0$  Hz, 1H), 3.86 (d,  $J = 14.0$  Hz, 1H), 3.82 (s, 3H), 2.40 (s, 3H);  $^{13}\text{C}$  NMR (100 MHz,  $\text{CDCl}_3$ )  $\delta$  166.4, 162.5, 159.1, 138.6, 138.4, 137.1, 129.4, 129.4, 129.1, 129.0, 127.6, 127.5, 124.4, 117.7, 114.0, 111.8, 70.3, 69.3, 55.3, 50.0, 45.8, 21.4; HRMS (ESI) calcd. for  $\text{C}_{28}\text{H}_{27}\text{N}_2\text{O}_3^+$  ( $\text{M} + \text{H}$ ) $^+$  439.2022, found 439.2018; HPLC (AS-H, *n*-hexane/*i*-PrOH = 80:20, flow rate = 1.0 mL/min, I = 254 nm)  $\tau_{\text{major}} = 11.7$  min,  $\tau_{\text{minor}} = 8.1$  min;  $[\alpha]_{\text{D}}^{25} -160.5$  (c 1.0,  $\text{CHCl}_3$ , 93:7 er).

**(3S,4S)-3-(4-isopropylphenyl)-6-(4-methoxybenzyl)-8-methylene-2-phenyl-2,6-diazaspiro[3.4]octane-1,5-dione (3bc)**

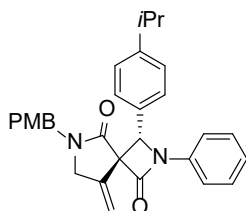

The product was purified by silica gel column chromatography (ethyl acetate/petroleum ether = 1:5). 45.7 mg, 49%, white solid.  $^1\text{H}$  NMR (400 MHz,  $\text{CDCl}_3$ )  $\delta$  7.40 (d,  $J = 7.8$  Hz, 2H), 7.25-7.36 (m, 6H), 7.13 (t,  $J = 7.2$  Hz, 1H), 6.76 (s, 4H), 5.47 (s, 1H), 5.39 (s, 1H), 5.11 (s, 1H), 4.66 (d,  $J = 14.6$  Hz, 1H), 3.88 (d,  $J = 14.6$  Hz, 1H), 3.85 (s, 1H), 3.81 (s, 3H), 2.98 - 2.93 (m, 1H), 1.30 (dd,  $J = 6.4, 2.4$  Hz, 6H);  $^{13}\text{C}$  NMR (100 MHz,  $\text{CDCl}_3$ )  $\delta$  166.4, 162.5, 159.1, 149.4, 138.4, 137.1, 129.7, 129.3, 129.1, 127.7, 127.6, 126.4, 124.4, 117.7, 113.9, 111.9, 70.3, 69.6, 55.3, 50.0, 45.8, 33.9, 24.1, 23.8; HRMS (ESI) calcd. for  $\text{C}_{30}\text{H}_{31}\text{N}_2\text{O}_3^+$  ( $\text{M} + \text{H}$ ) $^+$  467.2335, found 467.2330; HPLC (AS-H, *n*-hexane/*i*-

PrOH = 80:20, flow rate = 1.0 mL/min, I = 254 nm)  $\tau_{\text{major}} = 8.8$  min,  $\tau_{\text{minor}} = 6.4$  min;  $[\alpha]_{\text{D}}^{25} -155.3$  (c 1.0, CHCl<sub>3</sub>, 91:9 er).

**(3*S*,4*S*)-3-(4-(tert-butyl)phenyl)-6-(4-methoxybenzyl)-8-methylene-2-phenyl-2,6-diazaspiro[3.4]octane-1,5-dione (3bd)**

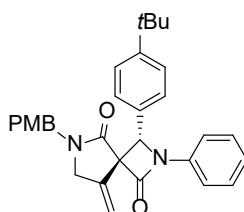

The product was purified by silica gel column chromatography (ethyl acetate/petroleum ether = 1:5). 65.3 mg, 68%, white solid. <sup>1</sup>H NMR (400 MHz, CDCl<sub>3</sub>)  $\delta$  7.28-7.40 (m, 8H), 7.11 (t,  $J = 7.2$  Hz, 1H), 6.71-6.76 (m, 4H), 5.44 (s, 1H), 5.37 (s, 1H), 5.08 (s, 1H), 4.66 (d,  $J = 14.4$  Hz, 1H), 3.85 (d,  $J = 14.4$  Hz, 1H), 3.82 (s, 2H), 3.78 (s, 3H), 1.34 (s, 9H); <sup>13</sup>C NMR (100 MHz, CDCl<sub>3</sub>)  $\delta$  166.4, 162.6, 159.1, 151.7, 138.4, 137.1, 129.3, 129.3, 129.1, 127.7, 127.4, 125.2, 124.4, 117.7, 113.9, 111.9, 70.3, 69.6, 55.3, 50.0, 45.8, 34.7, 31.4; HRMS (ESI) calcd. for C<sub>31</sub>H<sub>33</sub>N<sub>2</sub>O<sub>3</sub><sup>+</sup> (M + H)<sup>+</sup> 481.2491, found 481.2487; HPLC (AS-H, *n*-hexane/*i*-PrOH = 80:20, flow rate = 1.0 mL/min, I = 254 nm)  $\tau_{\text{major}} = 8.2$  min,  $\tau_{\text{minor}} = 6.0$  min;  $[\alpha]_{\text{D}}^{25} -146.2$  (c 1.0, CHCl<sub>3</sub>, 94.5:5.5 er).

**(3*S*,4*S*)-6-(4-methoxybenzyl)-3-(4-methoxyphenyl)-8-methylene-2-phenyl-2,6-diazaspiro[3.4]octane-1,5-dione(3be)**

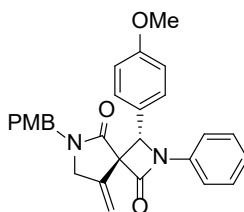

The product was purified by silica gel column chromatography (ethyl acetate/petroleum ether = 1:3). 48.1 mg, 53%, white solid, <sup>1</sup>H NMR (400 MHz, CDCl<sub>3</sub>)  $\delta$  7.30-7.37 (m, 6H), 7.10 (t,  $J = 7.0$  Hz, 1H), 6.89 (d,  $J = 7.2$  Hz, 2H), 6.78 (d,  $J = 8.0$  Hz, 2H), 6.74 (d,  $J = 8.0$  Hz, 2H) 5.43, (s, 1H), 5.35 (s, 1H), 5.06 (s, 1H), 4.57 (d,  $J = 14.6$  Hz, 1H), 3.94



(d,  $J = 14.6\text{Hz}$ , 1H), 3.83, (s, 2H), 3.82, (s, 3H), 3.78, (s, 3H);  $^{13}\text{C}$  NMR (100 MHz,  $\text{CDCl}_3$ )  $\delta$  166.5, 162.5, 160.0, 159.1, 138.4, 137.1, 129.3, 129.1, 129.0, 127.6, 124.4, 124.2, 117.7, 114.0, 113.7, 111.8, 70.4, 69.3, 55.3, 55.2, 50.0, 45.8; HRMS (ESI) calcd. for  $\text{C}_{28}\text{H}_{26}\text{N}_2\text{O}_4^+$  ( $\text{M} + \text{H}$ ) $^+$  455.1971, found 455.1962; HPLC (AS-H, *n*-hexane/*i*-PrOH = 80:20, flow rate = 1.0 mL/min, I = 254 nm)  $\tau_{\text{major}} = 20.3$  min,  $\tau_{\text{minor}} = 11.3$  min;  $[\alpha]_{\text{D}}^{25} -132.5$  (c 1.0,  $\text{CHCl}_3$ ,. 91.5:8.5 er).

**(3*S*,4*S*)-3-(4-fluorophenyl)-6-(4-methoxybenzyl)-8-methylene-2-phenyl-2,6-diazaspiro[3.4]octane-1,5-dione (3bf)**

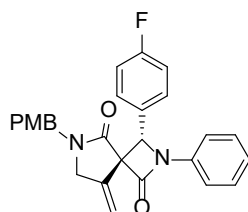

The product was purified by silica gel column chromatography (ethyl acetate/petroleum ether = 1:3). 54.8 mg, 62%, white solid.  $^1\text{H}$  NMR (400 MHz,  $\text{CDCl}_3$ )  $\delta$  7.30-7.35 (m, 6H), 7.02-7.13 (m, 2H), 6.75-6.82 (m, 4H), 5.46 (s, 1H), 5.39 (s, 1H), 5.09 (s, 1H), 4.56 (d,  $J = 14.6$  Hz, 1H), 3.95 (d,  $J = 14.6$  Hz, 1H), 3.86 (s, 2H), 3.79 (s, 3H);  $^{13}\text{C}$  NMR (100 MHz,  $\text{CDCl}_3$ )  $\delta$  166.3, 163.0 (d,  $J = 246.0$  Hz), 162.2, 159.2, 138.0, 136.9, 129.5, 129.4, 129.2, 128.2 (d,  $J = 3.0$  Hz), 127.6, 124.6, 117.6, 115.4 (d,  $J = 21.6$  Hz), 114.0, 112.1, 70.2, 68.6, 55.3, 50.1, 45.9; HRMS (ESI) calcd. for  $\text{C}_{27}\text{H}_{24}\text{FN}_2\text{O}_3^+$  ( $\text{M} + \text{H}$ ) $^+$  443.1771, found 443.1767; HPLC (AS-H, *n*-hexane/*i*-PrOH = 80:20, flow rate = 1.0 mL/min, I = 254 nm)  $\tau_{\text{major}} = 14.9$  min,  $\tau_{\text{minor}} = 9.8$  min;  $[\alpha]_{\text{D}}^{25} -142.1$  (c 1.0,  $\text{CHCl}_3$ , 88:12 er).

**(3*S*,4*S*)-3-(4-chlorophenyl)-6-(4-methoxybenzyl)-8-methylene-2-phenyl-2,6-diazaspiro[3.4]octane-1,5-dione (3bg)**

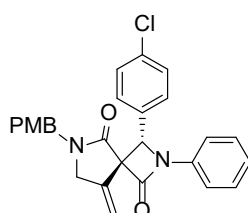

The product was purified by silica gel column chromatography (ethyl acetate/petroleum ether = 1:3). 48.5 mg, 53%, white solid.  $^1\text{H}$  NMR (400 MHz,  $\text{CDCl}_3$ )  $\delta$  7.24-7.38 (m, 9H), 6.75-6.78 (m, 4H), 5.46 (s, 1H), 5.39 (s, 1H), 5.09 (s, 1H), 4.57 (d,  $J = 14.6$ , 1H), 3.91 (d,  $J = 14.6$  Hz, 1H), 3.84 (s, 2H), 3.79 (s, 3H);  $^{13}\text{C}$  NMR (100 MHz,  $\text{CDCl}_3$ )  $\delta$  166.1, 162.3, 159.1, 138.1, 135.5, 132.0, 129.6, 129.4, 129.2, 129.0, 128.4, 127.5, 118.9, 117.6, 114.0, 112.2, 70.5, 69.5, 55.3, 50.0, 45.9; HRMS (ESI) calcd. for  $\text{C}_{27}\text{H}_{24}\text{ClN}_2\text{O}_3^+$  ( $\text{M} + \text{H}$ ) $^+$  459.1475, found 459.1471; HPLC (AS-H, *n*-hexane/*i*-PrOH = 80:20, flow rate = 1.0 mL/min, I = 254 nm)  $\tau_{\text{major}} = 13.4$  min,  $\tau_{\text{minor}} = 9.3$  min;  $[\alpha]_{\text{D}}^{25} -149.3$  (c 1.0,  $\text{CHCl}_3$ , 89:11 er).

**(3*S*,4*S*)-3-(4-bromophenyl)-6-(4-methoxybenzyl)-8-methylene-2-phenyl-2,6-diazaspiro[3.4]octane-1,5-dione (3bh)**

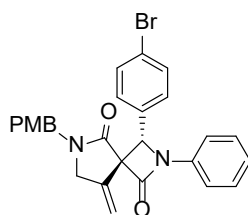

The product was purified by silica gel column chromatography (ethyl acetate/petroleum ether = 1:3). 48.2 mg, 48%, white solid.  $^1\text{H}$  NMR (400 MHz,  $\text{CDCl}_3$ )  $\delta$  7.48 (d,  $J = 8.4$  Hz, 2H), 7.28-7.34 (m, 4H), 7.23 (d,  $J = 8.4$  Hz, 2H), 7.13 (t,  $J = 6.4$  Hz, 1H), 6.78 (s, 4H), 5.46 (s, 1H), 5.39 (s, 1H), 5.05 (s, 1H), 4.59 (d,  $J = 14.6$  Hz, 1H), 3.92 (d,  $J = 14.6$  Hz, 1H), 3.86 (s, 2H), 3.81 (s, 3H);  $^{13}\text{C}$  NMR (100 MHz,  $\text{CDCl}_3$ )  $\delta$  166.2, 162.1, 159.2, 137.9, 136.8, 131.5, 129.4, 129.3, 129.2, 127.6, 124.7, 124.6, 123.0, 117.6, 114.1, 112.3, 70.2, 68.6, 55.3, 50.1, 45.9; HRMS (ESI) calcd. for  $\text{C}_{27}\text{H}_{24}\text{BrN}_2\text{O}_3^+$  ( $\text{M} + \text{H}$ ) $^+$  503.0970, found 503.0964; HPLC (AS-H, *n*-hexane/*i*-PrOH = 80:20, flow rate = 1.0 mL/min, I = 254 nm)  $\tau_{\text{major}} = 14.2$  min,  $\tau_{\text{minor}} = 9.9$  min;  $[\alpha]_{\text{D}}^{25} -151.4$  (c 1.0,  $\text{CHCl}_3$ , 86:14 er).

**Methyl-4-((1*S*,4*S*)-6-(4-methoxybenzyl)-8-methylene-3,5-dioxo-2-phenyl-2,6-diazaspiro[3.4]octan-1-yl)benzoate (3bi)**

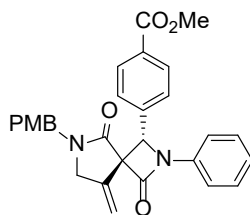

The product was purified by silica gel column chromatography (ethyl acetate/petroleum ether = 1:2). 50.1mg, 52%, white solid.  $^1\text{H}$  NMR (400 MHz,  $\text{CDCl}_3$ )  $\delta$  8.03 (d,  $J = 8.4$  Hz, 2H), 7.41 (d,  $J = 8.4$  Hz, 2H), 7.29-7.35 (m, 4H), 7.11-7.15 (m, 1H), 6.75-6.79 (m, 4H), 5.49 (d,  $J = 0.8$  Hz, 1H), 5.41 (d,  $J = 0.8$  Hz, 1H), 5.15 (s, 1H), 4.54 (d,  $J = 14.4$  Hz, 1H), 3.94 (d,  $J = 14.4$  Hz, 1H), 3.92 (s, 3H), 3.87 (s, 2H), 3.80 (s, 3H);  $^{13}\text{C}$  NMR (100 MHz,  $\text{CDCl}_3$ )  $\delta$  166.7, 166.0, 162.1, 159.2, 137.9, 137.7, 136.8, 130.5, 129.6, 129.4, 129.2, 127.5, 127.4, 124.7, 117.6, 114.1, 112.4, 70.2, 68.4, 55.3, 52.2, 50.0, 45.9; HRMS (ESI) calcd. for  $\text{C}_{29}\text{H}_{27}\text{N}_2\text{O}_5^+$  ( $\text{M} + \text{H}$ ) $^+$  483.1920, found 483.1915; HPLC (AS-H, *n*-hexane/*i*-PrOH = 80:20, flow rate = 1.0 mL/min, I = 254 nm)  $\tau_{\text{major}} = 21.9$  min,  $\tau_{\text{minor}} = 14.0$  min;  $[\alpha]_{\text{D}}^{25} -143.1$  (c 1.0,  $\text{CHCl}_3$ , 87.5:12.5v).

**(3S,4S)-6-(4-methoxybenzyl)-8-methylene-2-phenyl-3-(4-(trifluoromethyl)phenyl)-2,6-diazaspiro[3.4]octane-1,5-dione (3bj)**

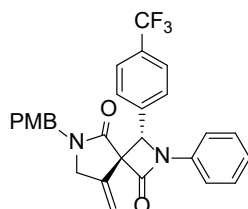

The product was purified by silica gel column chromatography (ethyl acetate/petroleum ether = 1:3). 52.2 mg, 53%, white solid.  $^1\text{H}$  NMR (400 MHz,  $\text{CDCl}_3$ )  $\delta$  7.61 (d,  $J = 8.0$  Hz, 2H), 7.47 (d,  $J = 8.0$  Hz, 2H), 7.30-7.34 (m, 4H), 7.12-7.16 (m, 1H), 6.73-6.78 (m, 4H), 5.49 (s, 1H), 5.43 (s, 1H), 5.15 (s, 1H), 4.58 (d,  $J = 14.6$  Hz, 1H), 3.91 (d,  $J = 14.6$  Hz, 1H), 3.89 (s, 2H), 3.78 (s, 3H);  $^{13}\text{C}$  NMR (100 MHz,  $\text{CDCl}_3$ )  $\delta$  166.0, 162.1, 159.2, 137.7, 136.7, 136.6, 130.8 (q,  $J = 32.2$  Hz), 129.4, 129.3, 128.0, 127.5, 125.3 (q,  $J = 4.1$  Hz), 124.8, 117.5, 114.0, 112.6, 70.2, 68.3, 55.2, 50.1, 46.0; HRMS (ESI) calcd. for  $\text{C}_{28}\text{H}_{24}\text{F}_3\text{N}_2\text{O}_3^+$  ( $\text{M} + \text{H}$ ) $^+$  493.1739, found 493.1733; HPLC (AS-H, *n*-hexane/*i*-PrOH

= 80:20, flow rate = 1.0 mL/min, I = 254 nm)  $\tau_{\text{major}} = 9.4$  min,  $\tau_{\text{minor}} = 6.7$  min;  $[\alpha]_{\text{D}}^{25} -124.5$ (c 1.0, CHCl<sub>3</sub>, 91.5:8.5 er).

**(3*S*,4*S*)-6-(4-methoxybenzyl)-8-methylene-2-phenyl-3-(*o*-tolyl)-2,6-diazaspiro[3.4]octane-1,5-dione (3bk)**

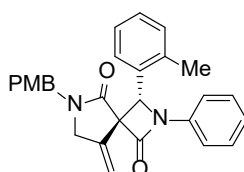

The product was purified by silica gel column chromatography (ethyl acetate/petroleum ether = 1:3). 44.8 mg, 51%, white solid. <sup>1</sup>H NMR (400 MHz, CDCl<sub>3</sub>)  $\delta$  7.14-7.41 (m, 9H), 6.85 (d,  $J = 8.0$  Hz, 2H), 6.79 (d,  $J = 8.0$  Hz, 2H), 5.50 (s, 1H), 5.41 (s, 1H), 5.27 (s, 1H), 4.67 (d,  $J = 14.4$  Hz, 1H), 3.92 (d,  $J = 14.4$  Hz, 1H), 3.87 (d,  $J = 13.6$  Hz, 2H), 3.83 (s, 3H), 2.09 (s, 3H); <sup>13</sup>C NMR (100 MHz, CDCl<sub>3</sub>)  $\delta$  166.0, 162.7, 159.2, 138.2, 137.2, 134.6, 130.7, 130.1, 129.5, 129.1, 128.4, 127.7, 125.7, 124.5, 117.7, 114.0, 112.0, 69.1, 66.6, 55.3, 50.0, 45.9, 19.3; HRMS (ESI) calcd. for C<sub>28</sub>H<sub>27</sub>N<sub>2</sub>O<sub>3</sub><sup>+</sup> (M + H)<sup>+</sup> 439.2022, found 439.2012; HPLC (AS-H, *n*-hexane/*i*-PrOH = 80:20, flow rate = 1.0 mL/min, I = 254 nm)  $\tau_{\text{major}} = 16.9$  min,  $\tau_{\text{minor}} = 10.1$  min;  $[\alpha]_{\text{D}}^{25} -143.2$ (c 1.0, CHCl<sub>3</sub>, 92.5:7.5 er).

**(3*S*,4*S*)-3-(3-fluoro-4-methylphenyl)-6-(4-methoxybenzyl)-8-methylene-2-phenyl-2,6-diazaspiro[3.4]octane-1,5-dione (3bl)**

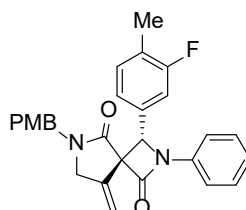

The product was purified by silica gel column chromatography (ethyl acetate/petroleum ether = 1:3). 47.4 mg, 52%, white solid. <sup>1</sup>H NMR (400 MHz, CDCl<sub>3</sub>)  $\delta$  7.28-7.36 (m, 4H), 7.09-7.19 (m, 3H), 6.98 (t,  $J = 8.8$  Hz, 1H), 6.81 (d,  $J = 8.4$  Hz, 2H), 6.77 (d,  $J = 8.4$  Hz, 2H), 5.44 (s, 1H), 5.37 (s, 1H), 5.04 (s, 1H), 4.59 (d,  $J = 14.6$  Hz, 1H), 3.94 (d,

$J = 14.6$  Hz, 1H), 3.86 (s, 2H), 3.79 (s, 3H), 2.26 (s, 3H);  $^{13}\text{C}$  NMR (100MHz,  $\text{CDCl}_3$ )  $\delta$  166.3, 162.3, 161.5 (d,  $J = 245.0$  Hz), 159.2, 138.3, 137.0, 130.5 (d,  $J = 5.4$  Hz), 129.3, 129.1, 127.9, 127.6, 126.8, (d,  $J = 8.0$  Hz), 124.8 (d,  $J = 18.0$  Hz), 124.5, 117.6, 115.0 (d,  $J = 22.0$  Hz), 114.0, 111.9, 70.2, 68.8, 55.3, 50.1, 45.9, 14.7; HRMS (ESI) calcd. for  $\text{C}_{28}\text{H}_{26}\text{FN}_2\text{O}_3^+$  ( $\text{M} + \text{H}$ ) $^+$  457.1927, found 457.1917; HPLC (AS-H, *n*-hexane/*i*-PrOH = 80:20, flow rate = 1.0 mL/min, I = 254 nm)  $\tau_{\text{major}} = 11.3$  min,  $\tau_{\text{minor}} = 7.5$  min;  $[\alpha]_{\text{D}}^{25} -132.5$  (c 1.0,  $\text{CHCl}_3$ , 90:10 er).

**(3*S*,4*S*)-3-(3,5-dimethylphenyl)-6-(4-methoxybenzyl)-8-methylene-2-phenyl-2,6-diazaspiro[3.4]octane-1,5-dione (3bm)**

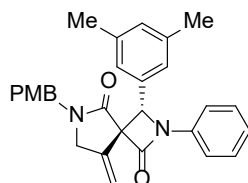

The product was purified by silica gel column chromatography (ethyl acetate/petroleum ether = 1:3). 48.8 mg, 54%, white solid.  $^1\text{H}$  NMR (400 MHz,  $\text{CDCl}_3$ )  $\delta$  7.39 (d,  $J = 4.0$  Hz, 2H), 7.28-7.32 (m, 2H), 7.11 (t,  $J = 7.2$  Hz, 1H), 6.96-6.98 (m, 3H), 6.80 (d,  $J = 8.0$  Hz, 2H), 6.75 (d,  $J = 8.0$  Hz, 2H), 5.43 (s, 1H), 5.36 (s, 1H), 5.05 (s, 1H), 4.63 (d,  $J = 14.6$  Hz, 1H), 3.92 (d,  $J = 14.6$  Hz, 1H), 3.85 (d,  $J = 7.6$  Hz, 2H), 3.79 (s, 3H), 2.31 (s, 6H);  $^{13}\text{C}$  NMR (100 MHz,  $\text{CDCl}_3$ )  $\delta$  166.4, 162.6, 159.1, 138.6, 137.8, 137.3, 132.4, 130.5, 129.3, 129.1, 127.7, 125.1, 124.3, 117.7, 114.1, 111.7, 70.2, 69.4, 55.3, 50.1, 45.8, 21.5; HRMS (ESI) calcd. for  $\text{C}_{29}\text{H}_{29}\text{N}_2\text{O}_3^+$  ( $\text{M} + \text{H}$ ) $^+$  453.2178, found 453.2171; HPLC (AS-H, *n*-hexane/*i*-PrOH = 80:20, flow rate = 1.0 mL/min, I = 254 nm)  $\tau_{\text{major}} = 8.8$  min,  $\tau_{\text{minor}} = 6.5$  min;  $[\alpha]_{\text{D}}^{25} -152.0$  (c 1.0,  $\text{CHCl}_3$ , 89:11 er).

**(3*S*,4*S*)-6-(4-methoxybenzyl)-8-methylene-3-(naphthalen-2-yl)-2-phenyl-2,6-diazaspiro[3.4]octane-1,5-dione (3bn)**

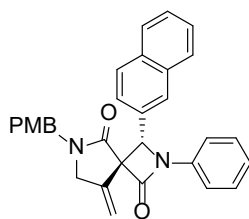

The product was purified by silica gel column chromatography (ethyl acetate/petroleum ether = 1:3). 55.9 mg, 59%, white solid.  $^1\text{H}$  NMR (400 MHz,  $\text{CDCl}_3$ )  $\delta$  7.82-7.88 (m, 4H), 7.51-7.60 (m, 3H), 7.28-7.40 (m, 4H), 7.11 (t,  $J = 7.2$  Hz, 1H), 6.53 (d,  $J = 8.2$  Hz, 2H), 6.41 (d,  $J = 8.2$  Hz, 2H), 5.52 (s, 1H), 5.42 (s, 1H), 5.28 (s, 1H), 4.58 (d,  $J = 14.6$  Hz, 1H), 3.90 (d,  $J = 14.0$  Hz, 1H), 3.84 (d,  $J = 14.0$  Hz, 1H), 3.79 (d,  $J = 14.6$  Hz, 1H), 3.69 (s, 3H);  $^{13}\text{C}$  NMR (100 MHz,  $\text{CDCl}_3$ )  $\delta$  166.4, 162.4, 159.0, 138.4, 137.2, 133.7, 133.0, 130.5, 129.2, 129.1, 128.2, 128.0, 128.0, 127.5, 126.9, 126.5, 126.3, 125.3, 124.5, 117.6, 113.9, 112.1, 70.6, 69.8, 55.2, 50.2, 45.8; HRMS (ESI) calcd. for  $\text{C}_{31}\text{H}_{27}\text{N}_2\text{O}_3^+$  ( $\text{M} + \text{H}$ ) $^+$  475.2022, found 475.2015; HPLC (AS-H, *n*-hexane/*i*-PrOH = 80:20, flow rate = 1.0 mL/min,  $I = 254$  nm)  $\tau_{\text{major}} = 10.9$  min,  $\tau_{\text{minor}} = 14.6$  min;  $[\alpha]_{\text{D}}^{25} -152.3$  (c 1.0,  $\text{CHCl}_3$ , 91:9 er).

**(3R,4S)-3-(furan-2-yl)-6-(4-methoxybenzyl)-8-methylene-2-phenyl-2,6-diazaspiro[3.4]octane-1,5-dione (3bo)**

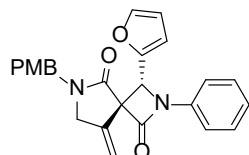

The product was purified by silica gel column chromatography (ethyl acetate/petroleum ether = 1:3). 48.8 mg, 59%, white solid.  $^1\text{H}$  NMR (400 MHz,  $\text{CDCl}_3$ )  $\delta$  7.44 (s, 1H), 7.29-7.38 (m, 4H), 7.13 (t,  $J = 7.2$  Hz, 1H), 7.00 (d,  $J = 8.4$  Hz, 2H), 6.82 (d,  $J = 8.4$  Hz, 2H), 6.42-6.54 (m, 2H), 5.42 (s, 1H), 5.36 (s, 1H), 5.13 (s, 1H), 4.60 (d,  $J = 14.6$  Hz, 1H), 4.16 (d,  $J = 14.6$  Hz, 1H), 3.90 (d,  $J = 14.4$  Hz, 1H), 3.87 (d,  $J = 14.4$  Hz, 1H), 3.79 (s, 3H);  $^{13}\text{C}$  NMR (100 MHz,  $\text{CDCl}_3$ )  $\delta$  166.1, 161.9, 159.2, 146.6, 142.7, 137.7, 136.6, 129.4, 129.1, 127.6, 124.6, 117.5, 114.1, 112.0, 111.3, 111.0, 69.6, 62.1, 55.3, 49.9, 46.0; HRMS (ESI) calcd. for  $\text{C}_{25}\text{H}_{23}\text{N}_2\text{O}_4^+$  ( $\text{M} + \text{H}$ ) $^+$  415.1658, found 415.1650;

HPLC (AS-H, *n*-hexane/*i*-PrOH = 80:20, flow rate = 1.0 mL/min, I = 254 nm)  $\tau_{\text{major}} = 23.6$  min,  $\tau_{\text{minor}} = 14.5$  min;  $[\alpha]_{\text{D}}^{25} -113.5$  (c 1.0, CHCl<sub>3</sub>, 95:5 er).

**(3*S*,4*S*)-6-(4-methoxybenzyl)-8-methylene-3-phenyl-2-(*p*-tolyl)-2,6-diazaspiro[3.4]octane-1,5-dione (3bp)**

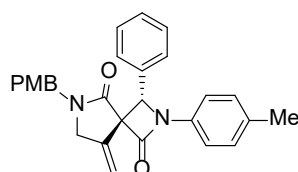

The product was purified by silica gel column chromatography (ethyl acetate/petroleum ether = 1:3). 53.4 mg, 61%, white solid, <sup>1</sup>H NMR (400 MHz, CDCl<sub>3</sub>)  $\delta$  7.33-7.37 (m, 5H), 7.24 (d, *J* = 8.2 Hz, 2H), 7.09 (d, *J* = 8.2 Hz, 2H), 6.77 (d, *J* = 8.8 Hz, 2H), 6.74 (d, *J* = 8.8 Hz, 2H), 5.44 (s, 1H), 5.36 (s, 1H), 5.08 (s, 1H), 4.56 (d, *J* = 14.6 Hz, 1H), 3.91 (d, *J* = 14.6 Hz, 1H), 3.83 (s, 2H), 3.78 (s, 3H), 2.29 (s, 3H); <sup>13</sup>C NMR (100 MHz, CDCl<sub>3</sub>)  $\delta$  166.4, 162.1, 159.1, 138.3, 134.6, 134.1, 132.6, 129.6, 129.4, 128.8, 128.3, 127.6, 127.6, 117.6, 114.0, 111.9, 70.1, 69.3, 55.3, 50.0, 45.8, 21.0; HRMS (ESI) calcd. for C<sub>28</sub>H<sub>27</sub>N<sub>2</sub>O<sub>3</sub><sup>+</sup> (M + H)<sup>+</sup> 439.2022, found 439.2018; HPLC (AS-H, *n*-hexane/*i*-PrOH = 80:20, flow rate = 1.0 mL/min, I = 254 nm)  $\tau_{\text{major}} = 16.4$  min,  $\tau_{\text{minor}} = 10.3$  min;  $[\alpha]_{\text{D}}^{25} -152.0$ (c 1.0, CHCl<sub>3</sub>, 95.5:4.5 er ).

**(3*S*,4*S*)-6-(4-methoxybenzyl)-2-(4-methoxyphenyl)-8-methylene-3-phenyl-2,6-diazaspiro[3.4]octane-1,5-dione(3bq)**

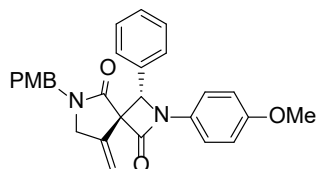

The product was purified by silica gel column chromatography (ethyl acetate/petroleum ether = 1:3). 42.7 mg, 47%, white solid. <sup>1</sup>H NMR (400 MHz, CDCl<sub>3</sub>)  $\delta$  7.38-7.40 (m, 5H), 7.33 (d, *J* = 8.4 Hz, 2H), 6.85 (d, *J* = 8.4 Hz, 2H), 6.76-6.81 (m, 4H), 5.48 (s, 1H), 5.40 (s, 1H), 5.10 (s, 1H), 4.59 (d, *J* = 14.8 Hz, 1H), 3.94 (d, *J* = 14.8 Hz, 1H), 3.86 (s, 2H), 3.81 (s, 3H), 3.79 (s, 3H); <sup>13</sup>C NMR (100 MHz, CDCl<sub>3</sub>)  $\delta$  166.4, 161.9, 159.1,

156.4, 138.3, 132.6, 130.6, 129.4, 128.8, 128.3, 127.6, 119.0, 114.4, 114.0, 111.9, 70.2, 69.4, 55.5, 55.3, 50.0, 45.8; HRMS (ESI) calcd. for  $C_{28}H_{27}N_2O_4^+$  ( $M + H$ )<sup>+</sup>455.1971, found 455.1966; HPLC (AS-H, *n*-hexane/*i*-PrOH = 80:20, flow rate = 1.0 mL/min, I = 254 nm)  $\tau_{major}$  = 31.1 min,  $\tau_{minor}$  = 19.0 min;  $[\alpha]_D^{25}$  -123.8 (c 1.0, CHCl<sub>3</sub>, 91:9 er).

**(3*S*,4*S*)-2-(4-fluorophenyl)-6-(4-methoxybenzyl)-8-methylene-3-phenyl-2,6-diazaspiro[3.4]octane-1,5-dione (3br)**

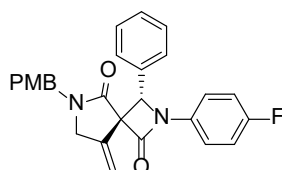

The product was purified by silica gel column chromatography (ethyl acetate/petroleum ether = 1:3). 59.2 mg, 67%, white solid. <sup>1</sup>H NMR (400 MHz, CDCl<sub>3</sub>)  $\delta$  7.35-7.39 (m, 7H), 6.99-7.02 (m, 2H), 6.73-6.78 (m, 4H), 5.46 (s, 1H), 5.39 (s, 1H), 5.09 (s, 1H), 4.57 (d,  $J$  = 14.6 Hz, 1H), 3.92 (d,  $J$  = 14.6 Hz, 1H), 3.84 (s, 2H), 3.79 (s, 3H); <sup>13</sup>C NMR (100 MHz, CDCl<sub>3</sub>)  $\delta$  166.2, 162.2, 159.9 (d,  $J$  = 242.6 Hz), 159.1, 138.1, 133.3 (d,  $J$  = 2.6 Hz), 132.1, 129.4, 129.0, 128.4, 127.6 (d,  $J$  = 3.5 Hz), 119.1 (d,  $J$  = 7.9 Hz), 116.0 (d,  $J$  = 23.0 Hz), 114.0, 112.1, 70.4, 69.5, 55.3, 50.0, 45.9; HRMS (ESI) calcd. for  $C_{27}H_{24}FN_2O_3^+$  ( $M + H$ )<sup>+</sup> 443.1771, found 443.1767; HPLC (AS-H, *n*-hexane/*i*-PrOH = 80:20, flow rate = 1.0 mL/min, I = 254 nm)  $\tau_{major}$  = 17.2 min,  $\tau_{minor}$  = 11.4 min;  $[\alpha]_D^{25}$  -152.2 (c 1.0, CHCl<sub>3</sub>, 96:4 er).

**(3*S*,4*S*)-2-(4-chlorophenyl)-6-(4-methoxybenzyl)-8-methylene-3-phenyl-2,6-diazaspiro[3.4]octane-1,5-dione (3bs)**

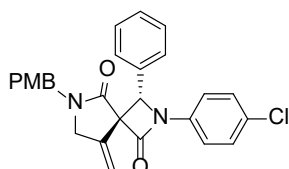

The product was purified by silica gel column chromatography (ethyl acetate/petroleum ether = 1:3). 41.2 mg, 45%, white solid. <sup>1</sup>H NMR (400 MHz, CDCl<sub>3</sub>)  $\delta$  7.22-7.40 (m, 9H), 6.76 (d,  $J$  = 8.8 Hz, 2H), 6.73 (d,  $J$  = 8.8 Hz, 2H), 5.46 (s, 1H), 5.39 (s, 1H), 5.09



(s, 1H), 4.56 (d,  $J = 14.6$  Hz, 1H), 3.91 (d,  $J = 14.6$  Hz, 1H), 3.84 (s, 2H), 3.78 (s, 3H);  $^{13}\text{C}$  NMR (100 MHz,  $\text{CDCl}_3$ )  $\delta$  166.1, 162.3, 159.1, 138.1, 135.4, 132.0, 129.6, 129.4, 129.2, 129.0, 128.4, 127.5, 127.5, 118.9, 114.0, 112.2, 70.5, 69.5, 55.3, 50.0, 45.9; HRMS (ESI) calcd. for  $\text{C}_{27}\text{H}_{24}\text{ClN}_2\text{O}_3^+$  ( $\text{M} + \text{H}$ ) $^+$  459.1475, found 459.1468; HPLC (AS-H, *n*-hexane/*i*-PrOH = 80:20, flow rate = 1.0 mL/min, I = 254 nm)  $\tau_{\text{major}} = 19.1$  min,  $\tau_{\text{minor}} = 11.8$  min;  $[\alpha]_{\text{D}}^{25} -133.214$  (c 1.0,  $\text{CHCl}_3$ , 91:9 er).

**(3*S*,4*S*)-2-(4-bromophenyl)-6-(4-methoxybenzyl)-8-methylene-3-phenyl-2,6-diazaspiro[3.4]octane-1,5-dione (3bt)**

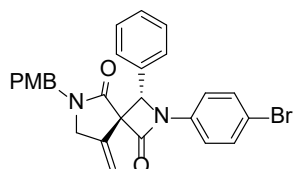

The product was purified by silica gel column chromatography (ethyl acetate/petroleum ether = 1:3). 46.2 mg, 46%, white solid.  $^1\text{H}$  NMR (400 MHz,  $\text{CDCl}_3$ )  $\delta$  7.34-7.43 (m, 7H), 7.27 (d,  $J = 8.0$  Hz, 2H), 6.78 (d,  $J = 8.8$  Hz, 2H), 6.74 (d,  $J = 8.2$  Hz, 2H), 5.48 (s, 1H), 5.41 (s, 1H), 5.11 (s, 1H), 4.59 (d,  $J = 14.6$  Hz, 1H), 3.93 (d,  $J = 14.6$  Hz, 1H), 3.87 (s, 2H), 3.81 (s, 3H);  $^{13}\text{C}$  NMR (100 MHz,  $\text{CDCl}_3$ )  $\delta$  166.1, 162.4, 159.1, 138.1, 136.0, 132.2, 132.0, 129.4, 129.0, 128.4, 127.5, 127.5, 119.2, 117.3, 114.0, 112.2, 70.5, 69.5, 55.3, 50.0, 45.9; HRMS (ESI) calcd. For  $\text{C}_{27}\text{H}_{24}\text{BrN}_2\text{O}_3^+$  ( $\text{M} + \text{H}$ ) $^+$  503.0970, found 503.0966; HPLC (AS-H, *n*-hexane/*i*-PrOH = 80:20, flow rate = 1.0 mL/min, I = 254 nm)  $\tau_{\text{major}} = 19.2$  min,  $\tau_{\text{minor}} = 12.0$  min;  $[\alpha]_{\text{D}}^{25} -114.4$  (c 1.0,  $\text{CHCl}_3$ , 94:6 er).

**(3*S*,4*S*)-6-(4-methoxybenzyl)-8-methylene-3-phenyl-2-(4-(trifluoromethyl)phenyl)-2,6-diazaspiro[3.4]octane-1,5-dione (3bu)**

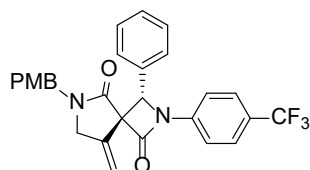

The product was purified by silica gel column chromatography (ethyl acetate/petroleum ether = 1:3). 49.2 mg, 50%, white solid,  $^1\text{H}$  NMR (400 MHz,  $\text{CDCl}_3$ )  $\delta$  7.36-7.56 (m,

9H), 6.73-6.78 (m, 4H), 5.47 (s, 1H), 5.41 (s, 1H), 5.15 (s, 1H), 4.57 (d,  $J = 14.6$  Hz, 1H), 3.92 (d,  $J = 14.6$  Hz, 1H), 3.86 (s, 2H), 3.79 (s, 3H).  $^{13}\text{C}$  NMR (100 MHz,  $\text{CDCl}_3$ )  $\delta$  166.0, 162.8, 159.2, 139.7, 138.0, 131.8, 129.4, 129.1, 128.5, 127.5, 127.4, 126.5 (q,  $J = 3.0$  Hz), 125.7, (q,  $J = 270.0$  Hz), 117.6, 114.1, 112.3, 70.6, 69.6, 55.3, 50.0, 45.9. HRMS (ESI) calcd. for  $\text{C}_{28}\text{H}_{24}\text{F}_3\text{N}_2\text{O}_3^+$  ( $\text{M} + \text{H}$ ) $^+$  493.1739, found 493.1731, HPLC (AS-H, *n*-hexane/*i*-PrOH = 80:20, flow rate = 1.0 mL/min, I = 254 nm)  $\tau_{\text{major}} = 12.1$  min,  $\tau_{\text{minor}} = 7.8$  min;  $[\alpha]_{\text{D}}^{25} -110.4$  (c 1.0,  $\text{CHCl}_3$ , 92:8 er).

**(3*S*,4*S*)-6-(4-methoxybenzyl)-8-methylene-3-phenyl-2-(*m*-tolyl)-2,6-diazaspiro[3.4]octane-1,5-dione (3bv)**

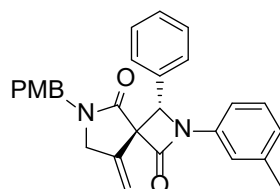

The product was purified by silica gel column chromatography (ethyl acetate/petroleum ether = 1:3). 43.7 mg, 54%, white solid,  $^1\text{H}$  NMR (400 MHz,  $\text{CDCl}_3$ )  $\delta$  7.39 – 7.35 (m, 6H), 7.16 (t,  $J = 8.0$  Hz, 1H), 7.02 (d,  $J = 8.0$  Hz, 1H), 6.93 (d,  $J = 7.6$  Hz, 1H), 6.80 – 6.74 (m, 4H), 5.45 (s, 1H), 5.37 (s, 1H), 5.11 (s, 1H), 4.58 (d,  $J = 14.6$  Hz, 1H), 3.92 (d,  $J = 14.6$  Hz, 1H), 3.85 (d,  $J = 1.5$  Hz, 2H), 3.79 (s, 3H), 2.31 (s, 3H).  $^{13}\text{C}$  NMR (100 MHz,  $\text{CDCl}_3$ )  $\delta$  166.3, 162.4, 159.1, 139.3, 138.4, 137.0, 132.6, 129.4, 128.9, 128.8, 128.3, 127.6, 127.5, 125.3, 118.5, 114.6, 114.0, 111.9, 70.1, 69.3, 55.3, 50.0, 45.8, 21.5. HRMS (ESI) calcd. for  $\text{C}_{28}\text{H}_{27}\text{N}_2\text{O}_3^+$  ( $\text{M} + \text{H}$ ) $^+$  439.2016, found 439.2014, HPLC (AS, *n*-hexane/*i*-PrOH = 80:20, flow rate = 1.0 mL/min, I = 254 nm)  $\tau_{\text{major}} = 9.7$  min,  $\tau_{\text{minor}} = 7.5$  min;  $[\alpha]_{\text{D}}^{25} -143.2$  (c 1.0,  $\text{CHCl}_3$ , 93.5:6.5 er).

**(3*S*,4*S*)-6-(4-methoxybenzyl)-8-methylene-3-phenyl-2-(*o*-tolyl)-2,6-diazaspiro[3.4]octane-1,5-dione (3bw)**

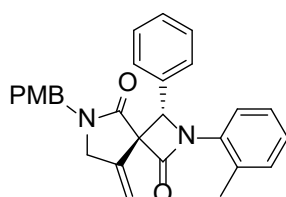

The product was purified by silica gel column chromatography (ethyl acetate/petroleum ether = 1:3). 20.2 mg, 23%, white solid,  $^1\text{H}$  NMR (400 MHz,  $\text{CDCl}_3$ )  $\delta$  7.30-7.28 (m, 6H), 7.20 – 7.18 (m, 1H), 7.15 (q,  $J = 4.0$  Hz, 2H), 6.74 (s, 4H), 5.54 (s, 1H), 5.43 (s, 1H), 5.36 (s, 1H), 4.60 (d,  $J = 14.6$  Hz, 1H), 3.92 (d,  $J = 14.6$  Hz, 1H), 3.85 (s, 2H), 3.78 (s, 3H), 2.60 (s, 3H).  $^{13}\text{C}$  NMR (100 MHz,  $\text{CDCl}_3$ )  $\delta$  166.8, 162.8, 159.1, 138.1, 134.5, 133.1, 132.8, 131.7, 129.3, 128.6, 128.3, 127.7, 127.6, 126.8, 126.4, 121.8, 114.0, 112.3, 70.3, 69.8, 55.3, 50.0, 45.8, 19.7. HRMS (ESI) calcd. for  $\text{C}_{28}\text{H}_{27}\text{N}_2\text{O}_3^+$  ( $\text{M} + \text{H}$ ) $^+$  439.2016, found 439.2018, HPLC (AS, *n*-hexane/*i*-PrOH = 80:20, flow rate = 1.0 mL/min, I = 254 nm)  $\tau_{\text{major}} = 23.7$  min,  $\tau_{\text{minor}} = 8.2$  min;  $[\alpha]_{\text{D}}^{25} -145.4$  (c 1.0,  $\text{CHCl}_3$ , 90:10 er).

**(3*S*,4*S*)-2-(6-fluoropyridin-3-yl)-6-(4-methoxybenzyl)-8-methylene-3-phenyl-2,6-diazaspiro[3.4]octane-1,5-dione(3bx)**

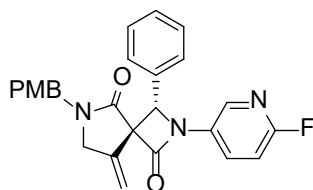

The product was purified by silica gel column chromatography (ethyl acetate/petroleum ether = 1:3). 46.1 mg, 52%, white solid,  $^1\text{H}$  NMR (400 MHz,  $\text{CDCl}_3$ )  $\delta$  8.09 – 8.05 (m, 2H), 7.42 – 7.39 (m, 5H), 6.96 – 6.93 (m, 1H), 6.76 (s, 4H), 5.50 (s, 1H), 5.44 (s, 1H), 5.15 (s, 1H), 4.59 (d,  $J = 14.6$  Hz, 1H), 3.95 (d,  $J = 14.6$  Hz, 1H), 3.87 (s, 2H), 3.81 (s, 3H).  $^{13}\text{C}$  NMR (100 MHz,  $\text{CDCl}_3$ )  $\delta$  165.9, 162.5, 159.7 (d,  $J = 236.0$  Hz), 159.1, 137.8, 135.8, (d,  $J = 15.0$  Hz), 131.8 (d,  $J = 4.0$  Hz), 131.3, 130.7 (d,  $J = 7.0$  Hz), 129.3, 129.3, 128.6, 127.6, 127.4, 114.1, 112.5, 110.0 (d,  $J = 39.0$  Hz), 71.2, 69.7, 55.3, 50.0, 45.9. HRMS (ESI) calcd. for  $\text{C}_{26}\text{H}_{23}\text{FN}_3\text{O}_3^+$  ( $\text{M} + \text{H}$ ) $^+$  444.1718, found 444.1708, HPLC (AS, *n*-hexane/*i*-PrOH = 80:20, flow rate = 1.0 mL/min, I = 254 nm)  $\tau_{\text{major}} = 16.2$  min,  $\tau_{\text{minor}} = 12.3$  min;  $[\alpha]_{\text{D}}^{25} -121.6$  (c 1.0,  $\text{CHCl}_3$ , 95:5 er).

**(4*R*)-*N*-benzyl-2-oxo-1,4-diphenyl-*N*-(prop-2-yn-1-yl)azetidione-3-carboxamide (7)**

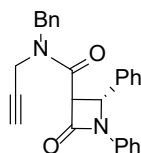

The product was purified by silica gel column chromatography (ethyl acetate/petroleum ether = 1:10). 44 mg, 55%, white solid.  $^1\text{H}$  NMR (400 MHz,  $\text{CDCl}_3$ , two rotamers)  $\delta$  7.17-7.50 (m, 14H), 7.07-7.12 (m, 1H), 5.84 & 5.79 (2d,  $J = 2.4$  Hz, 1H), 5.23 & 5.08 (2d,  $J = 14.8$  Hz, 1H), 4.85 & 4.82 (2d,  $J = 13.2$  Hz, 1H), 4.14-4.42 (m, 2H), 3.91 & 3.87 (2d,  $J = 14.8$  Hz, 1H), 2.20-2.22 (m, 1H);  $^{13}\text{C}$  NMR (100 MHz,  $\text{CDCl}_3$ , two rotamers)  $\delta$  164.9, 164.8, 160.8, 160.4, 137.2, 136.7, 136.7, 136.0, 129.3, 129.3, 129.2, 129.1, 128.9, 128.8, 128.2, 128.0, 127.8, 127.5, 126.4, 126.3, 124.4, 124.4, 117.3, 117.3, 78.2, 77.9, 73.3, 72.4, 63.5, 63.4, 57.6, 57.5, 50.0, 48.7, 36.1, 34.3; HRMS (ESI) calcd. for  $\text{C}_{26}\text{H}_{25}\text{N}_2\text{O}_2^+$  ( $\text{M} + \text{H}$ ) $^+$  395.1081, found 395.1075; HPLC (AS-H, *n*-hexane/*i*-PrOH = 80:20, flow rate = 1.0 mL/min, I = 254 nm)  $\tau_{\text{major}} = 7.8$  min,  $\tau_{\text{minor}} = 10.1$  min;  $[\alpha]_{\text{D}}^{25} - 76.7$  (c 1.0,  $\text{CHCl}_3$ , 94:6 er).

#### IV. Synthetic Transformations

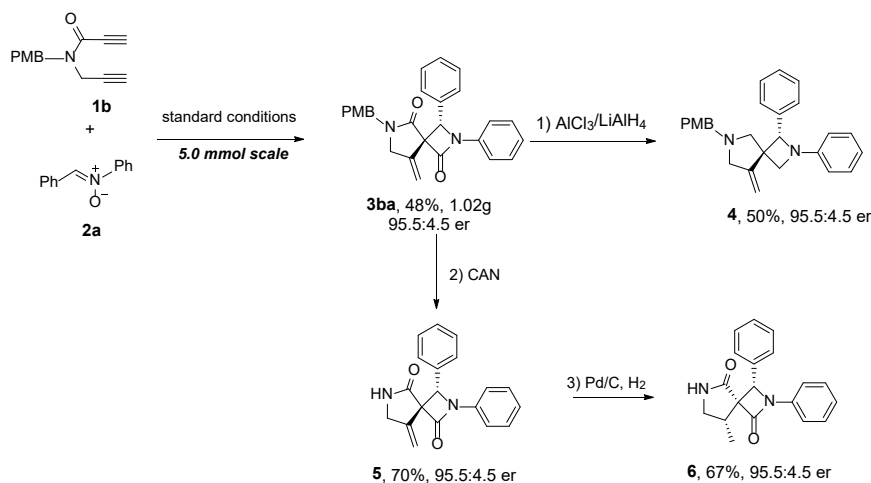

**Gram synthesis of 3ba:** A mixture of  $\text{Cu}(\text{CH}_3\text{CN})_4\text{PF}_6$  (0.5 mmol, 186.2 mg, 10 mol%) with (4*R*,4'*R*)-L5 (L5, 0.6 mmol, 467.4 mg, 12 mol%) in dry  $\text{PhCF}_3$  (10 mL) was stirred at room temperature for 0.5 h under the atmosphere of argon. Then, corresponding propiolamide **1b** (5.0 mmol, 1.14 g, 1.0 equiv.), nitrone **2a** (6.0 mmol, 1.18 g, 1.2 equiv.),  $\text{Cs}_2\text{CO}_3$  (15.0 mmol, 4.88 g, 3.0 equiv.) and dry  $\text{PhCF}_3$  (20 mL) were added to the mixture at  $-10$  °C for 6 hours subsequently, transfer to  $60$  °C and 30 ml of dry DMSO

was added to continue the reaction for 6 hours. After the reaction was complete (monitored by TLC), the solvent was removed in vacuum. Then H<sub>2</sub>O (50.0 mL) and ethyl acetate (50.0 mL) were added into the mixture. The organic phase was separated, and the aqueous phase was extracted with ethyl acetate (50.0 mL × 3). The combined organic phase was washed with H<sub>2</sub>O and brine, dried over Na<sub>2</sub>SO<sub>4</sub>. The solvent was removed under reduced pressure. The residue was purified by flash chromatography (ethyl acetate/petroleum ether = 1:5) to afford the desired products **3ba** in 48% yield (1.02 g) with 95.5:4.5 er.

**Synthesis of 4:** The mixture of **3ba** (0.1 mmol, 42.4 mg, 1.0 equiv.), LiAlH<sub>4</sub> (0.62 mmol, 6.2 equiv.) and AlCl<sub>3</sub> (0.62 mmol, 6.2 equiv.) in Et<sub>2</sub>O (10 mL) were stirred at room temperature for 45 minutes. After the reaction was complete, the reaction was quenched with saturated NaHCO<sub>3</sub> solution and extracted with dichloromethane. The organic phase was dried over Na<sub>2</sub>SO<sub>4</sub>, concentrated in vacuum and the residue was loaded on silica column (ethyl acetate/petroleum ether = 3:1) to afford compound **4** as a white solid in 50% yield (19.8 mg). <sup>1</sup>H NMR (400 MHz, CDCl<sub>3</sub>) δ 7.30-7.37 (m, 5H), 7.17 (t, *J* = 7.6 Hz, 2H), 6.94 (d, *J* = 8.4 Hz, 2H), 6.75-6.80 (m, 3H), 6.49 (d, *J* = 7.8 Hz, 2H), 5.20 (s, 1H), 5.18 (s, 1H), 4.95 (s, 1H), 4.01 (d, *J* = 6.8 Hz, 1H), 3.79 (s, 3H), 3.74 (d, *J* = 6.8 Hz, 1H), 3.49 (d, *J* = 13.0 Hz, 1H), 3.14-3.29 (m, 3H), 2.58 (d, *J* = 9.6 Hz, 1H), 2.42 (d, *J* = 9.6 Hz, 1H); <sup>13</sup>C NMR (100 MHz, CDCl<sub>3</sub>) δ 158.5, 151.8, 138.7, 129.3, 128.9, 128.3, 127.5, 126.7, 118.4, 113.6, 112.9, 106.5, 63.3, 61.5, 59.5, 59.3, 55.3, 49.8, 29.7; HRMS (ESI) calcd. for C<sub>27</sub>H<sub>29</sub>N<sub>2</sub>O<sup>+</sup> (M + H)<sup>+</sup> 397.2280, found 397.2275; HPLC (AD-H, n-hexane/*i*-PrOH = 99:1, flow rate = 1.0 mL/min, I = 254 nm) τ<sub>major</sub> = 6.5 min, τ<sub>minor</sub> = 9.1 min; [α]<sub>D</sub><sup>25</sup> -76.7 (c 1.0, CHCl<sub>3</sub>, 95.5:4.5 er).

**Synthesis of 5:** The mixture of **3ba** (0.1 mmol, 42.4 mg, 1.0 equiv.), Ce(NH<sub>4</sub>)<sub>2</sub>(NO<sub>3</sub>)<sub>6</sub> (0.4 mmol, 219.3 mg, 4.0 equiv.) in MeCN/H<sub>2</sub>O (9:1, 10 mL) were stirred at room temperature for 12 hours. After the reaction was complete, the mixture was quenched with H<sub>2</sub>O and extracted with DCM, dried over Na<sub>2</sub>SO<sub>4</sub>. The organic phase was

concentrated in vacuum and the residue was loaded on silica column (ethyl acetate/petroleum ether=3:1) to afford compound **5** as a white solid in 70% yield (21.3mg). <sup>1</sup>H NMR (400 MHz, DMSO-*d*<sub>6</sub>) δ 8.09 (s, 1H), 7.37 - 7.28 (m, 9H), 7.13 (d, *J* = 7.2 Hz, 1H), 5.46 (s, 2H), 5.40 (s, 1H), 4.00 - 3.90 (m, 2H). <sup>13</sup>C NMR (100MHz, DMSO-*d*<sub>6</sub>) δ 169.0, 163.2, 141.4, 137.1, 133.4, 129.7, 128.6, 128.3, 128.0, 124.7, 117.9, 112.3, 69.5, 67.8, 45.8. HRMS (ESI) calcd. for C<sub>19</sub>H<sub>17</sub>N<sub>2</sub>O<sub>2</sub><sup>+</sup> (M + H)<sup>+</sup> 305.1290, found 305.1281 HPLC (AS-H, *n*-hexane/*i*-PrOH = 80:20, flow rate = 1.0 mL/min, I = 254 nm) τ<sub>major</sub> = 10.4 min, τ<sub>minor</sub> = 12.8 min; [α]<sub>D</sub><sup>25</sup> 22.6 (c 1.0, CHCl<sub>3</sub>, 95.5:4.5 er).

**Synthesis of 6:** A mixture of **5** (0.1 mmol, 30.4 mg, 1.0 equiv) and Pd/C (0.01mmol, 10.6mg, 10 mol%) in EtOH (10 mL) was stirred at room temperature for 12 h under the atmosphere of hydrogen. After the reaction was complete (monitored by TLC), the mixture was quenched with H<sub>2</sub>O and extracted with dichloromethane, dried over Na<sub>2</sub>SO<sub>4</sub>. The organic phase was concentrated in vacuum and the residue was loaded on silica column (ethyl acetate/petroleum ether = 3:1) to afford compound **6** as a white solid in 96% yield (29.5 mg). <sup>1</sup>H NMR (400 MHz, CDCl<sub>3</sub>) δ 7.25-7.34 (m, 9H), 7.08 (t, *J* = 6.8 Hz, 1H), 5.57 (s, 1H), 5.05 (s, 1H), 3.48-3.52 (m, 1H), 3.10-3.13 (m, 1H), 2.98-3.04 (m, 1H), 1.40 (d, *J* = 7.2 Hz, 3H); <sup>13</sup>C NMR (100MHz, CDCl<sub>3</sub>) δ 170.7, 162.5, 137.1, 132.8, 129.1, 128.6, 128.3, 127.3, 124.2, 117.4, 69.6, 64.1, 47.0, 37.4, 15.0; HRMS (ESI) calcd. for C<sub>19</sub>H<sub>19</sub>N<sub>2</sub>O<sub>2</sub><sup>+</sup> (M + H)<sup>+</sup> 307.1447, found 307.1438; HPLC (AS-H, *n*-hexane/*i*-PrOH = 80:20, flow rate = 1.0 mL/min, I = 254 nm) τ<sub>major</sub> = 11.7min, τ<sub>minor</sub> = 15.1min; [α]<sub>D</sub><sup>25</sup> 38.9 (c 1.0, CHCl<sub>3</sub>, 95.5:4.5 er).

## V. X-Ray Crystallographic Data of 3aa and 3aa'

### X-Ray Crystallographic Analysis of 3aa

A suitable crystal of **3aa** was selected and collected on a SuperNova, Dual, Cu at zero, AtlasS2 diffractometer. The crystal was kept at 292.99(10) K during data collection. Using Olex2<sup>[1]</sup>, the structure was solved with the SHELXS structure solution

program using Direct Methods and refined with the SHELXL refinement package using Least Squares minimisation.

The chiral **3aa** was completely dissolved in ethyl acetate (0.1 mL), Petroleum ether (0.2 mL) was added slowly to the solution at room temperature. The solvent diffused slowly, and the single crystal was obtained after two days. The structure in **Figure S1** showed the absolute configuration of **3aa** is (3*S*, 4*S*). The CCDC number is 2371699. These details can be obtained free of charge via <https://www.ccdc.com.ac.uk/> from the Cambridge Crystallographic Data Centre.

**Figure S1. Thermal Ellipsoid Plot for 3aa (50% probability level)**

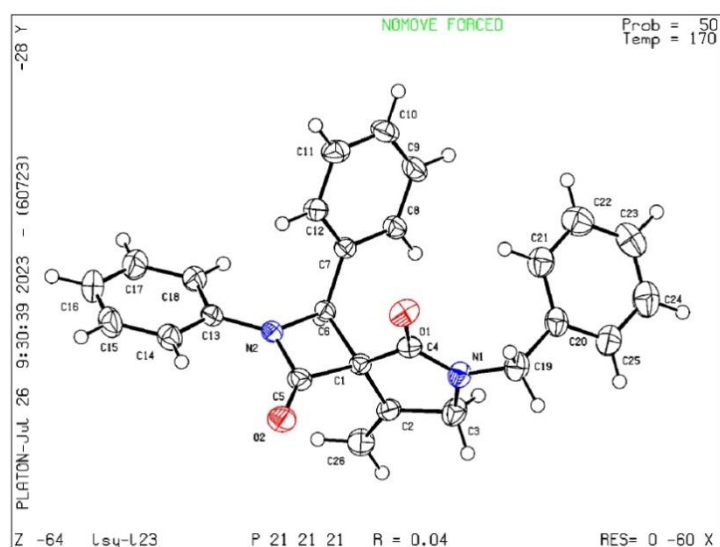

**Table 1 Crystal data and structure refinement for LSY-L23.**

|                     |                                                               |
|---------------------|---------------------------------------------------------------|
| Identification code | LSY-L23                                                       |
| Empirical formula   | C <sub>26</sub> H <sub>22</sub> N <sub>2</sub> O <sub>2</sub> |
| Formula weight      | 394.45                                                        |
| Temperature/K       | 170.00(10)                                                    |
| Crystal system      | orthorhombic                                                  |
| Space group         | P2 <sub>1</sub> 2 <sub>1</sub> 2 <sub>1</sub>                 |
| a/Å                 | 9.99923(13)                                                   |
| b/Å                 | 13.0716(2)                                                    |
| c/Å                 | 16.3120(3)                                                    |

|                                               |                                                               |
|-----------------------------------------------|---------------------------------------------------------------|
| $\alpha/^\circ$                               | 90                                                            |
| $\beta/^\circ$                                | 90                                                            |
| $\gamma/^\circ$                               | 90                                                            |
| Volume/ $\text{\AA}^3$                        | 2132.07(6)                                                    |
| Z                                             | 4                                                             |
| $\rho_{\text{calc}}/\text{cm}^3$              | 1.229                                                         |
| $\mu/\text{mm}^{-1}$                          | 0.620                                                         |
| F(000)                                        | 832.0                                                         |
| Crystal size/ $\text{mm}^3$                   | $0.15 \times 0.13 \times 0.11$                                |
| Radiation                                     | Cu K $\alpha$ ( $\lambda = 1.54184$ )                         |
| $2\theta$ range for data collection/ $^\circ$ | 8.668 to 146.87                                               |
| Index ranges                                  | $-12 \leq h \leq 12, -14 \leq k \leq 15, -19 \leq l \leq 14$  |
| Reflections collected                         | 12913                                                         |
| Independent reflections                       | 4218 [ $R_{\text{int}} = 0.0283, R_{\text{sigma}} = 0.0248$ ] |
| Data/restraints/parameters                    | 4218/0/279                                                    |
| Goodness-of-fit on $F^2$                      | 1.061                                                         |
| Final R indexes [ $I \geq 2\sigma(I)$ ]       | $R_1 = 0.0358, wR_2 = 0.0896$                                 |
| Final R indexes [all data]                    | $R_1 = 0.0373, wR_2 = 0.0913$                                 |
| Largest diff. peak/hole / $e \text{\AA}^{-3}$ | 0.28/-0.23                                                    |
| Flack/Hoof parameter                          | -0.02(10)/0.06(10)                                            |

### X-Ray Crystallographic Analysis of **3aa'**

A suitable crystal of **3aa'** was selected and collected on a SuperNova, Dual, Cu at zero, AtlasS2 diffractometer. The crystal was kept at 292.99(10) K during data collection. Using Olex2<sup>[1]</sup>, the structure was solved with the SHELXS structure solution program using Direct Methods and refined with the SHELXL refinement package using Least Squares minimisation.

The chiral **3aa'** was completely dissolved in ethyl acetate (0.1 mL), Petroleum ether (0.2 mL) was added slowly to the solution at room temperature. The solvent diffused slowly, and the single crystal was obtained after two days. The structure in



**Figure S2** showed the absolute configuration of **3aa'** is (3*S*,4*R*). The CCDC number is 2371702. These details can be obtained free of charge via <https://www.ccdc.com.ac.uk/> from the Cambridge Crystallographic Data Centre.

**Figure S2. Thermal Ellipsoid Plot for 3aa' (50% probability level)**

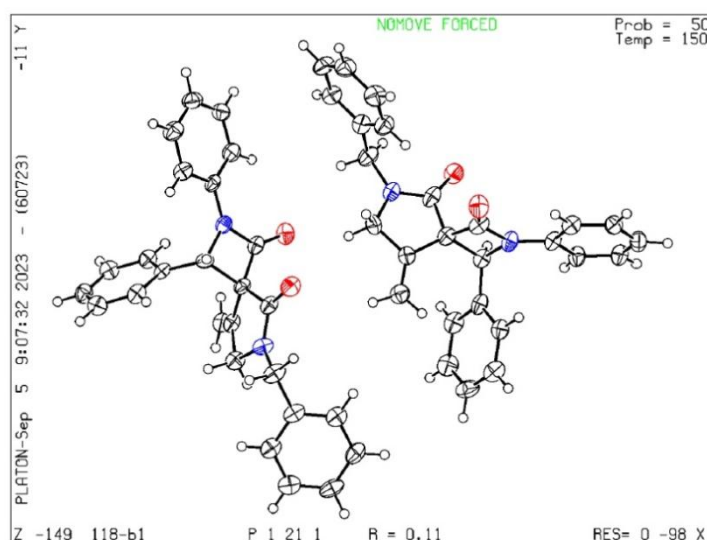

**Table 2 Crystal data and structure refinement for 118-b1.**

|                     |                                                               |
|---------------------|---------------------------------------------------------------|
| Identification code | 118-b1                                                        |
| Empirical formula   | C <sub>26</sub> H <sub>22</sub> N <sub>2</sub> O <sub>2</sub> |
| Formula weight      | 394.45                                                        |
| Temperature/K       | 150.00(10)                                                    |
| Crystal system      | monoclinic                                                    |
| Space group         | P2 <sub>1</sub>                                               |
| a/Å                 | 14.3085(14)                                                   |
| b/Å                 | 9.9631(10)                                                    |
| c/Å                 | 14.4518(16)                                                   |
| α/°                 | 90                                                            |
| β/°                 | 93.217(11)                                                    |
| γ/°                 | 90                                                            |

|                                             |                                                               |
|---------------------------------------------|---------------------------------------------------------------|
| Volume/Å <sup>3</sup>                       | 2057.0(4)                                                     |
| Z                                           | 4                                                             |
| ρ <sub>calc</sub> /cm <sup>3</sup>          | 1.274                                                         |
| μ/mm <sup>-1</sup>                          | 0.643                                                         |
| F(000)                                      | 832.0                                                         |
| Crystal size/mm <sup>3</sup>                | 0.16 × 0.12 × 0.1                                             |
| Radiation                                   | Cu Kα (λ = 1.54184)                                           |
| 2θ range for data collection/°              | 6.126 to 147.96                                               |
| Index ranges                                | -16 ≤ h ≤ 17, -12 ≤ k ≤ 11, -17 ≤ l ≤ 17                      |
| Reflections collected                       | 17946                                                         |
| Independent reflections                     | 7857 [R <sub>int</sub> = 0.1250, R <sub>sigma</sub> = 0.1341] |
| Data/restraints/parameters                  | 7857/1/541                                                    |
| Goodness-of-fit on F <sup>2</sup>           | 1.030                                                         |
| Final R indexes [I ≥ 2σ (I)]                | R <sub>1</sub> = 0.1063, wR <sub>2</sub> = 0.2908             |
| Final R indexes [all data]                  | R <sub>1</sub> = 0.1420, wR <sub>2</sub> = 0.3281             |
| Largest diff. peak/hole / e Å <sup>-3</sup> | 0.42/-0.46                                                    |
| Flack parameter                             | -0.2(8)                                                       |

## VI. NMR and HPLC Spectra

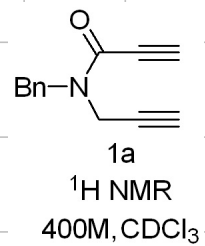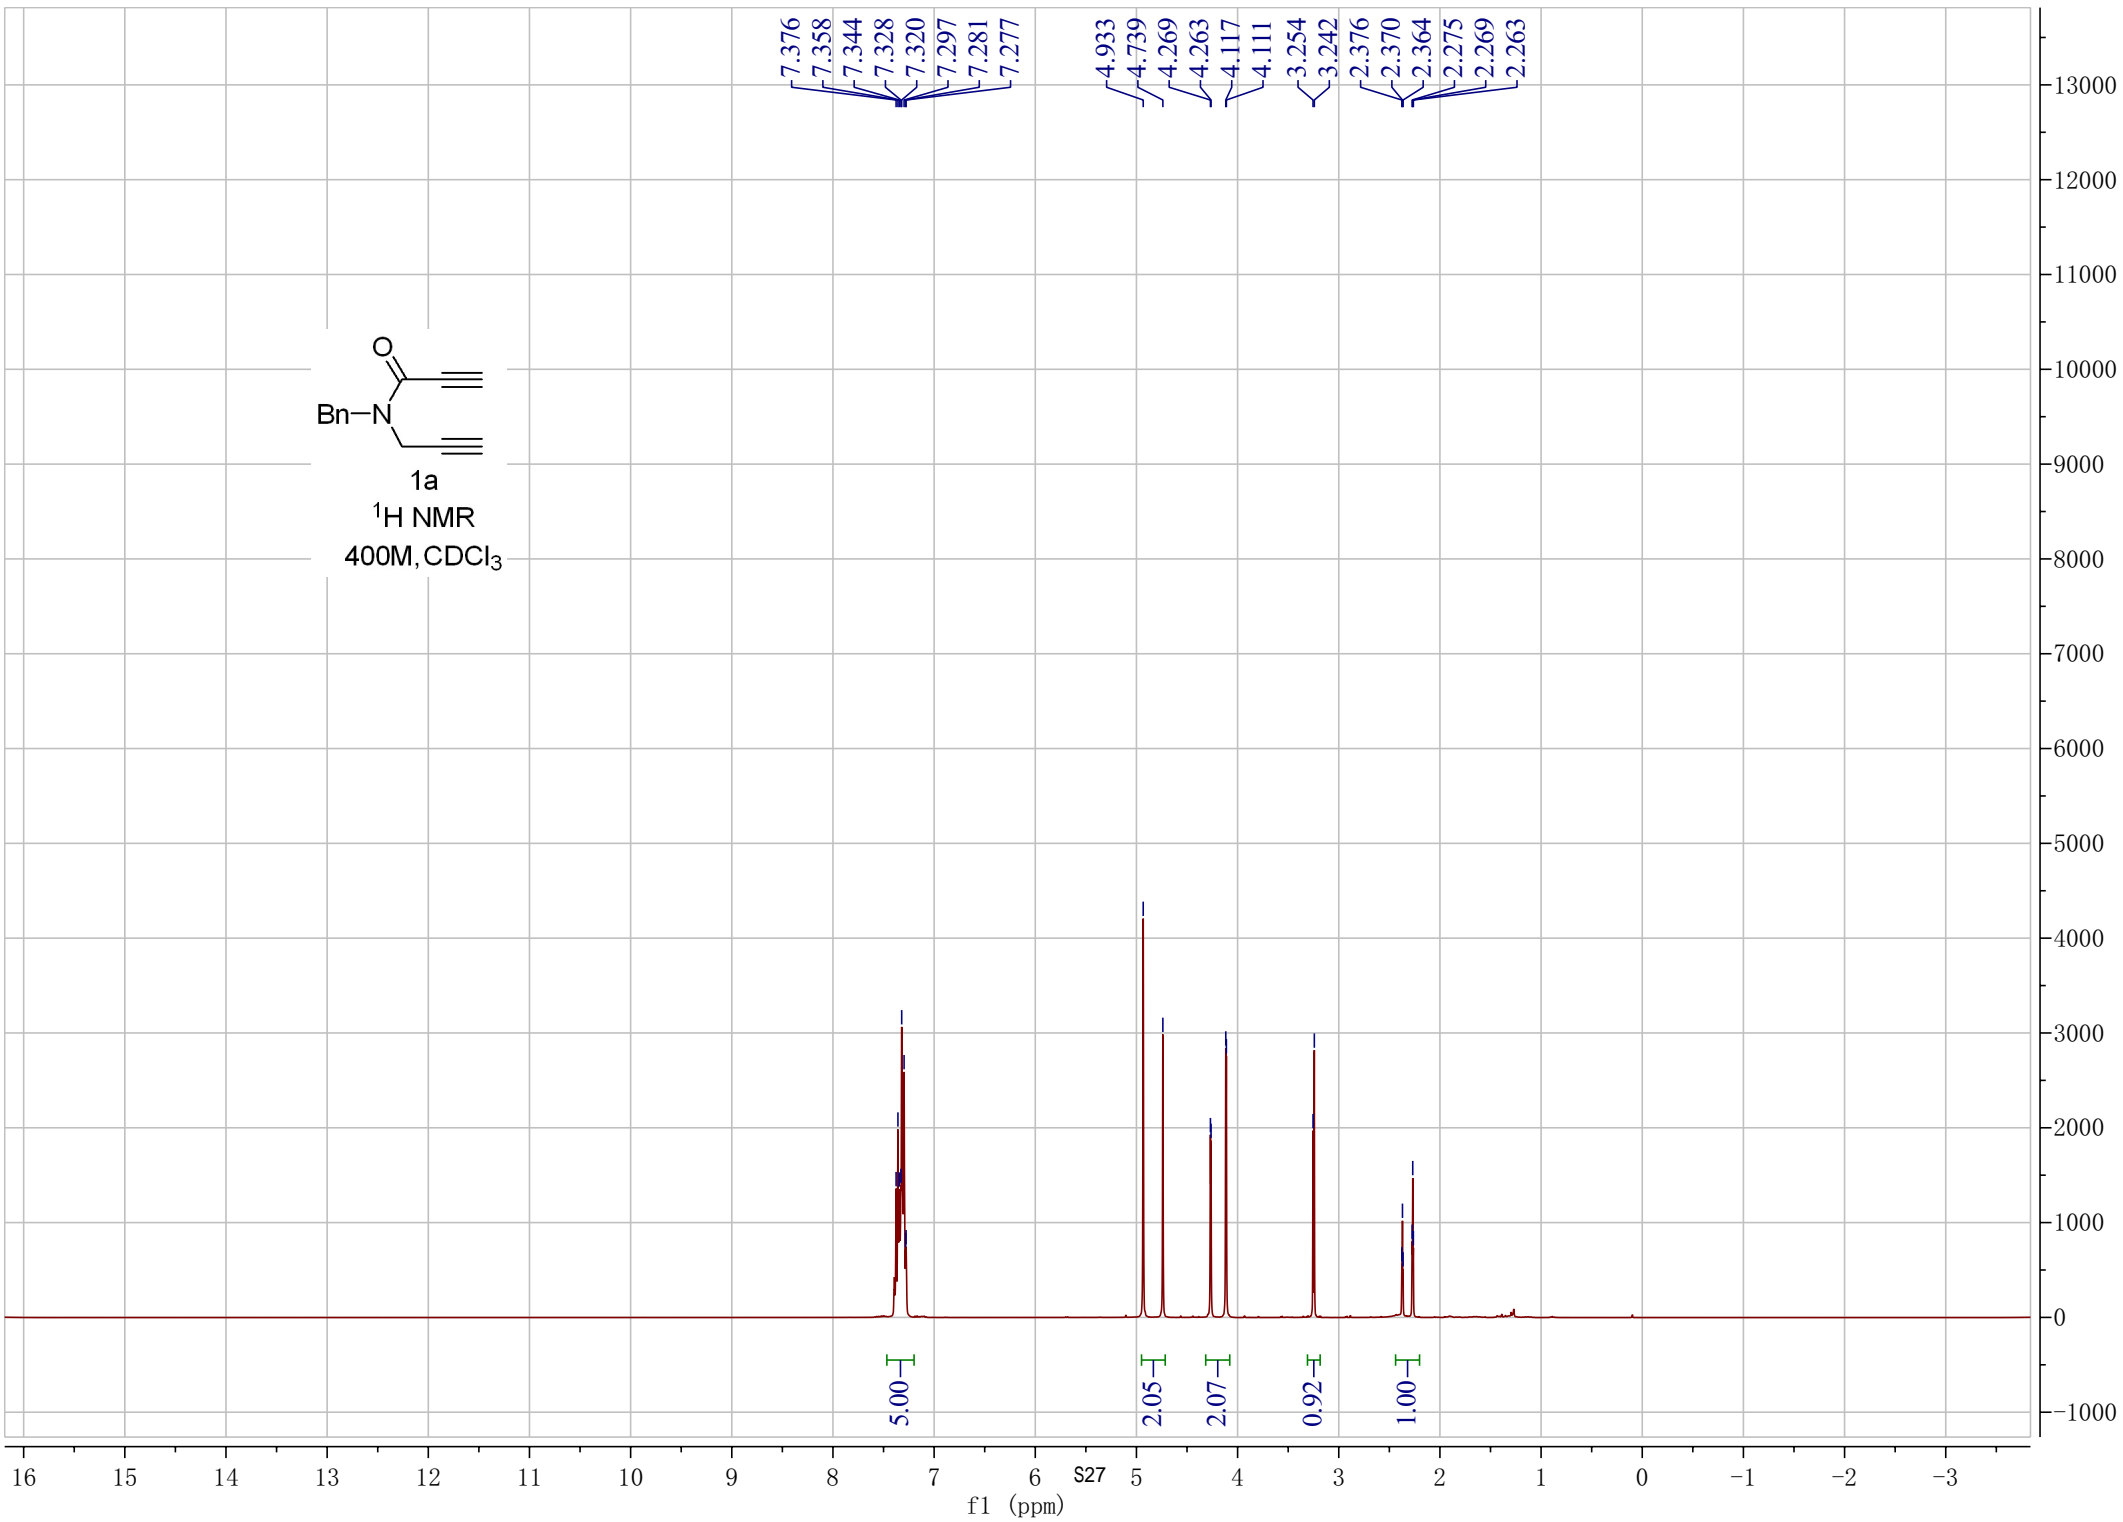

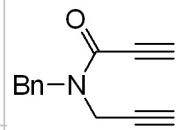

1a

$^{13}\text{C}$ NMR  
100M,  $\text{CDCl}_3$

153.07  
153.01

135.41  
135.14  
128.95  
128.82  
128.60  
128.28  
128.00  
127.85

80.18  
80.00  
77.40  
75.42  
75.10  
73.55  
72.81

51.39

46.64

37.54

32.43

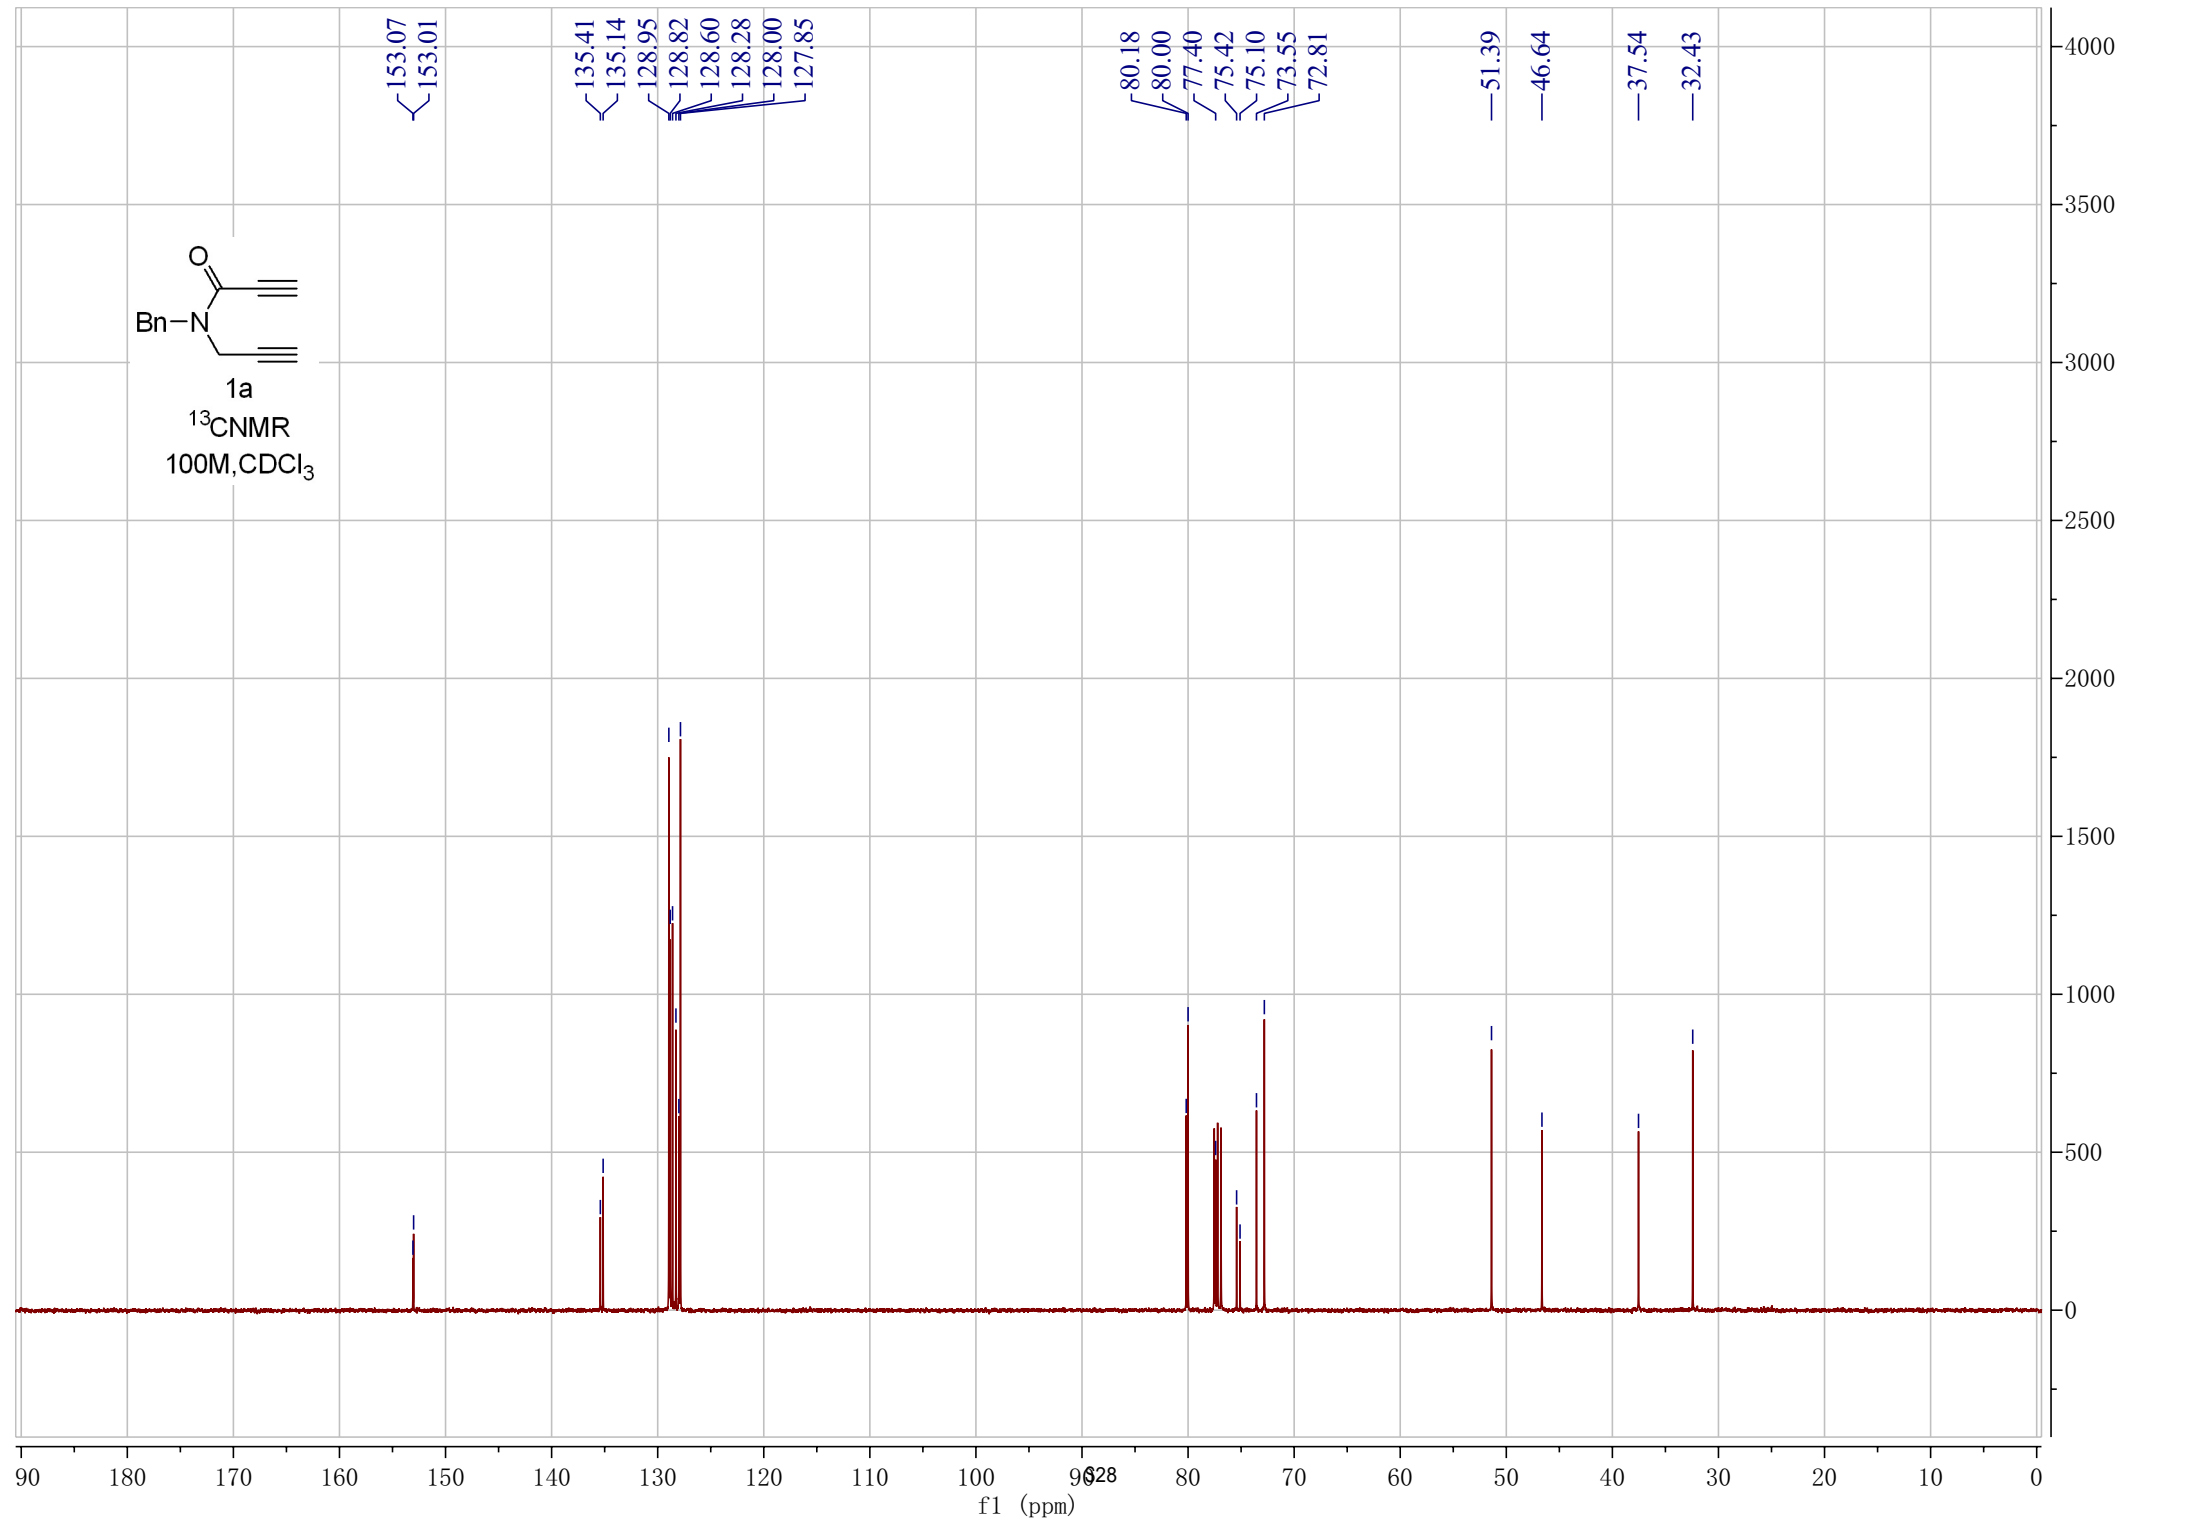

f1 (ppm)

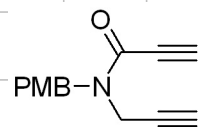

1b  
<sup>1</sup>H NMR  
400M, CDCl<sub>3</sub>

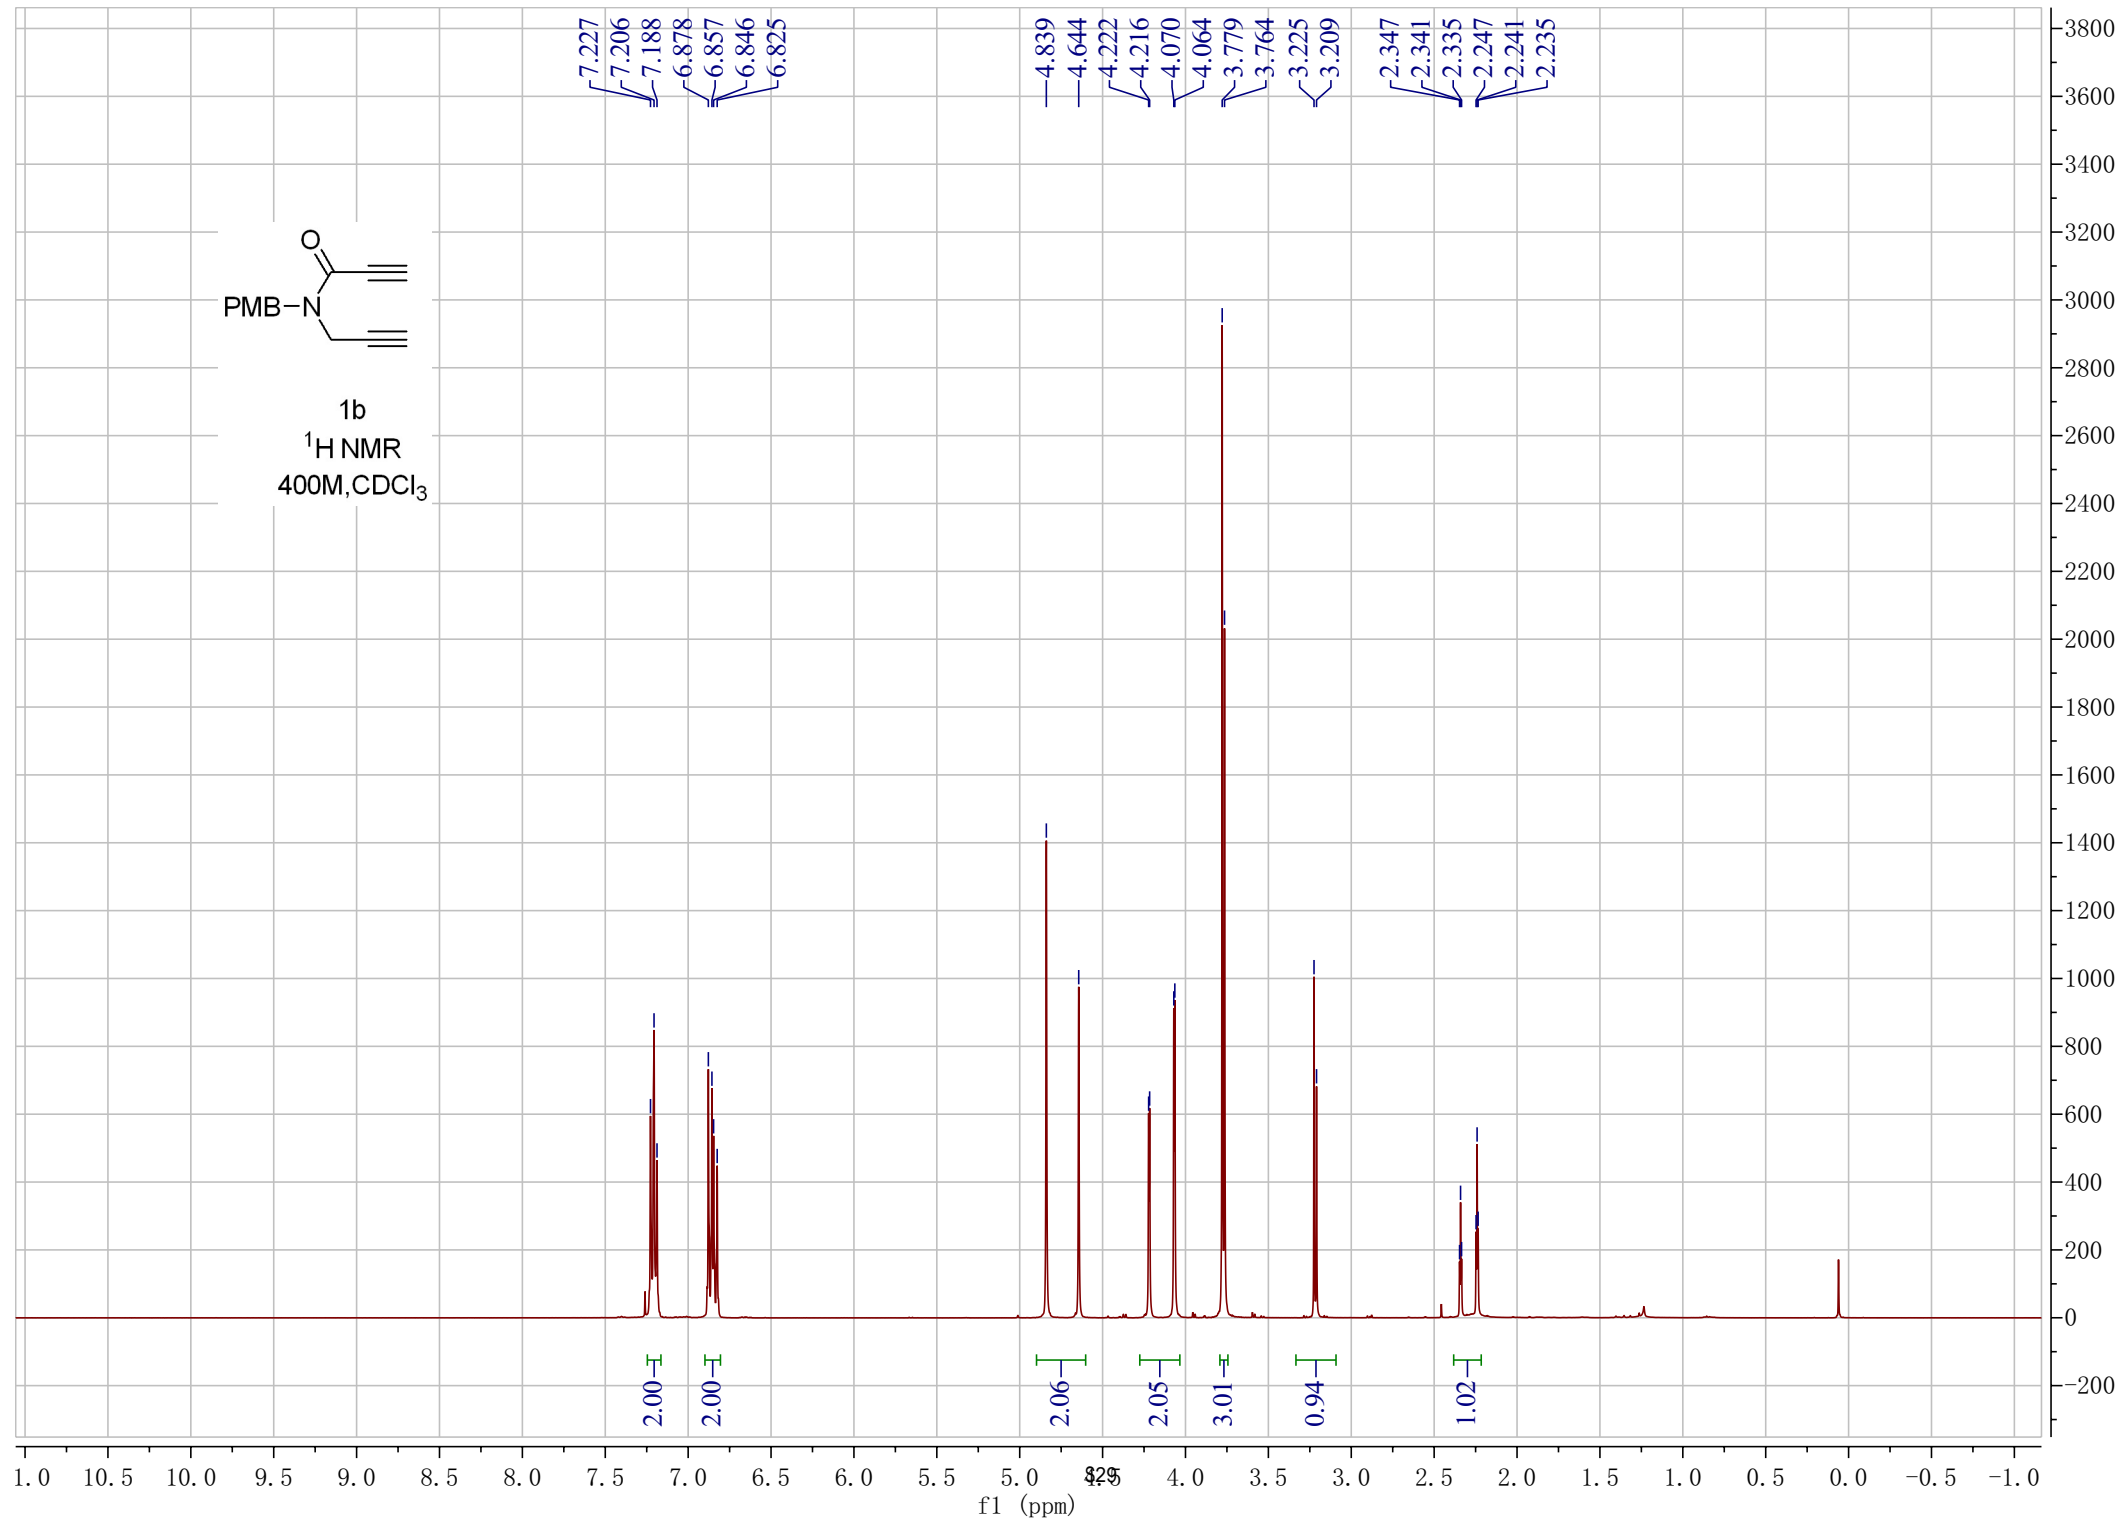

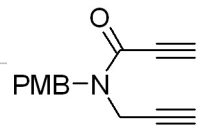

1b  
<sup>13</sup>CNMR  
100M, CDCl<sub>3</sub>

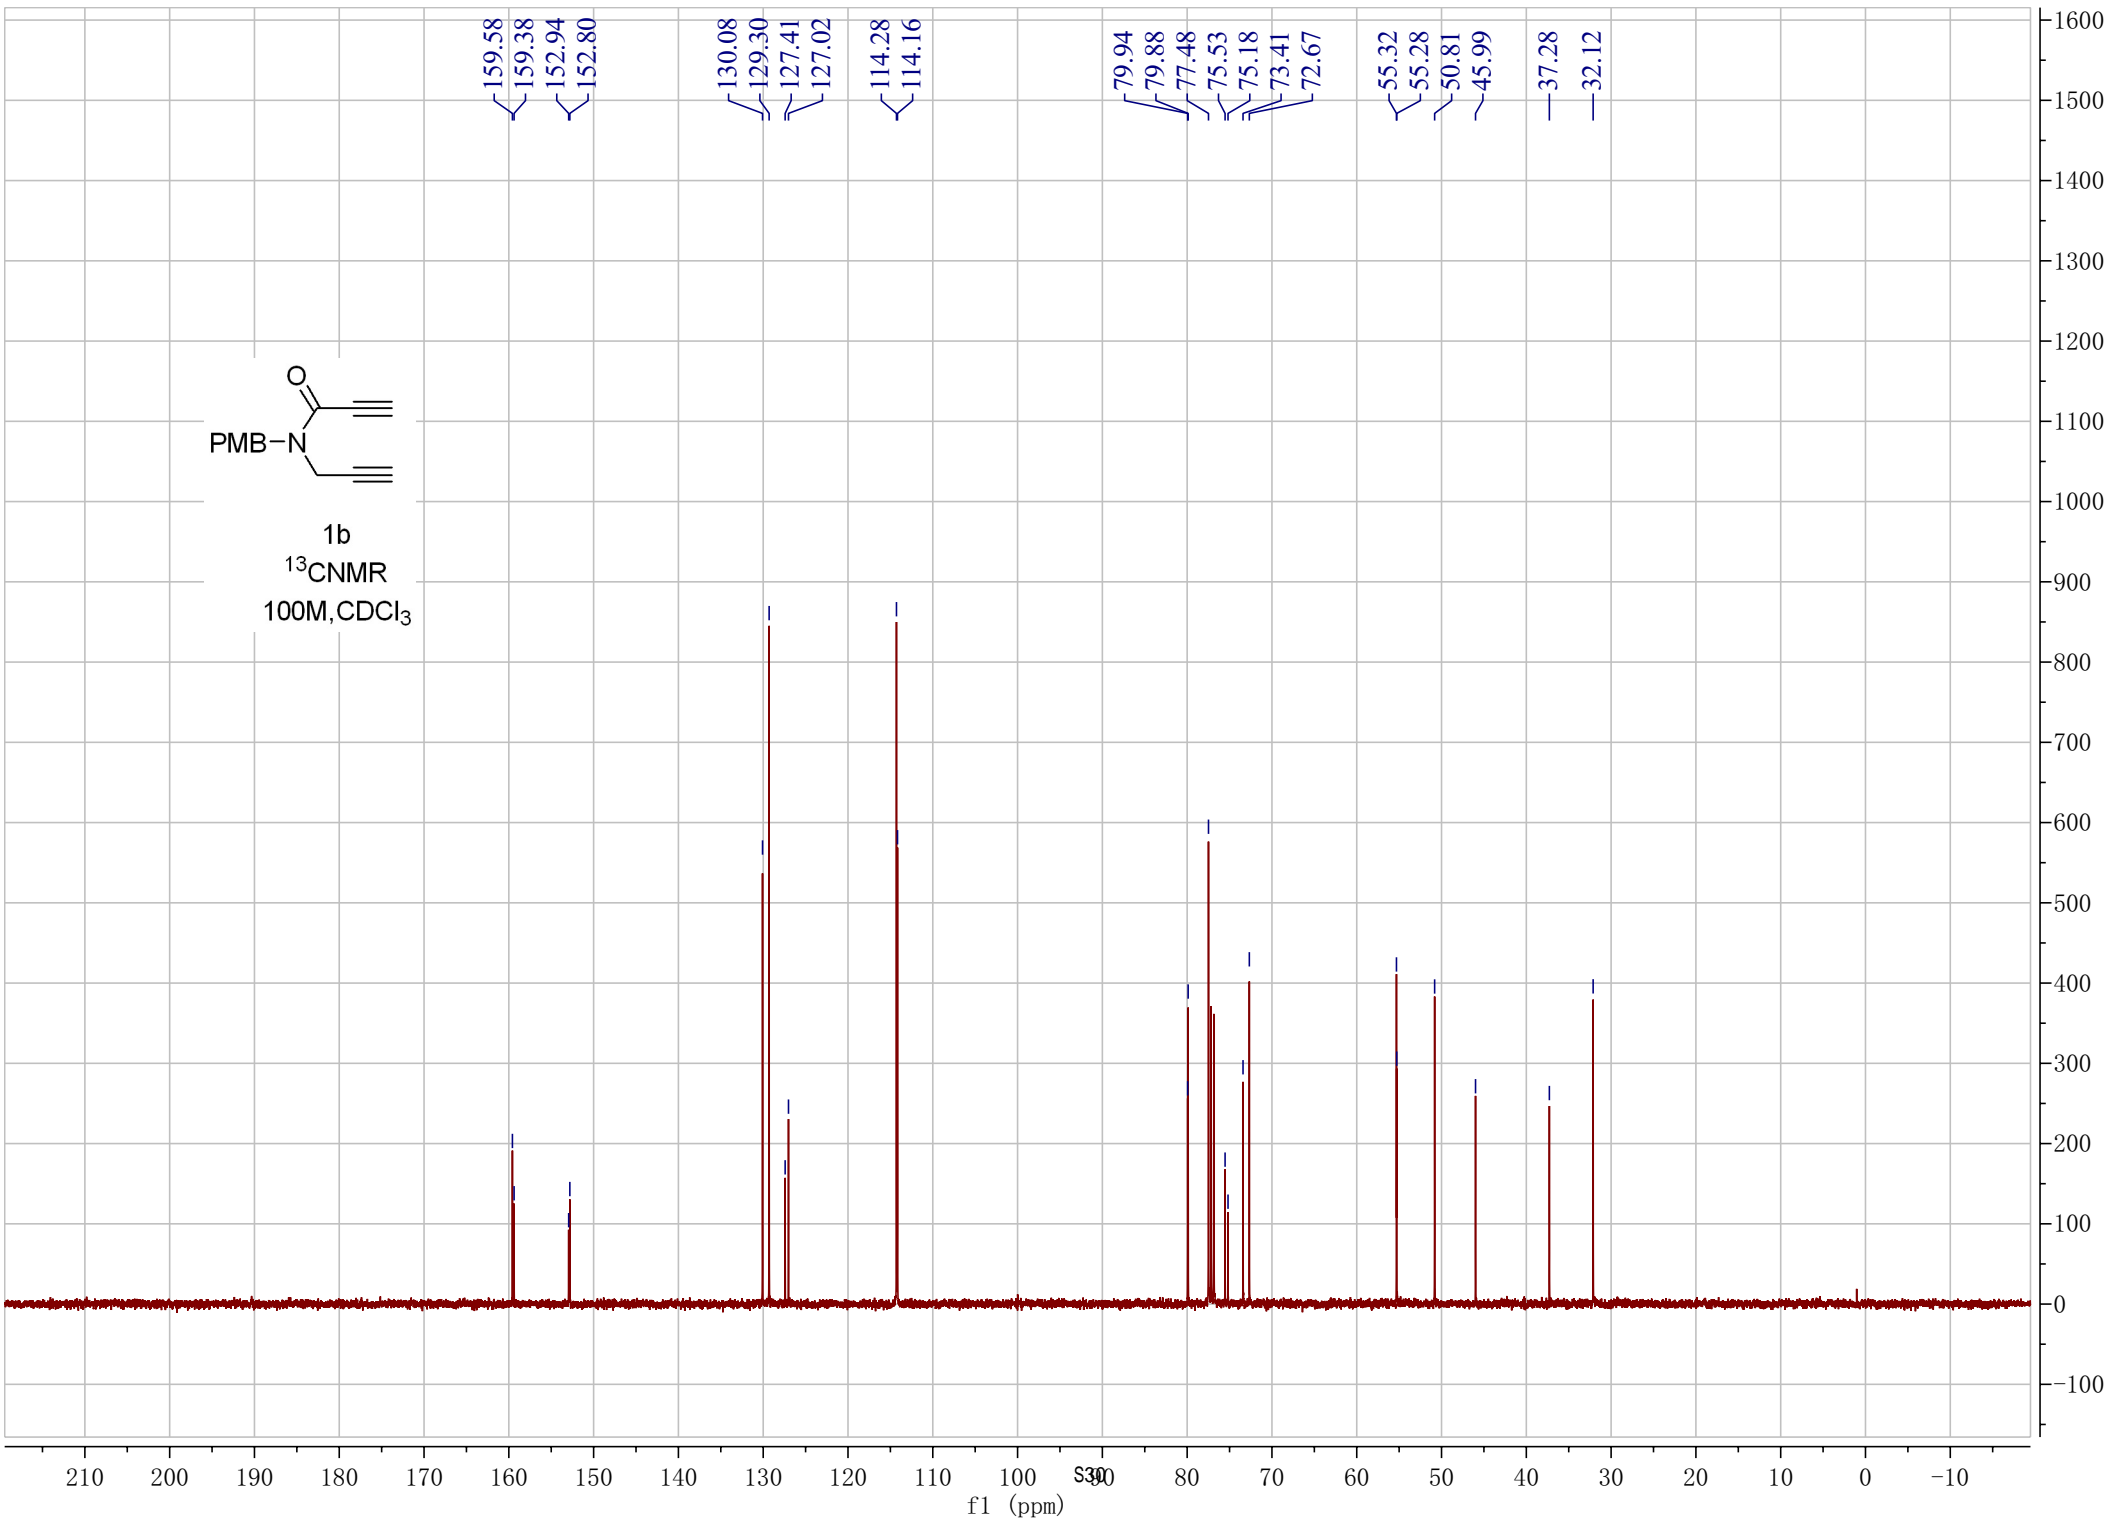

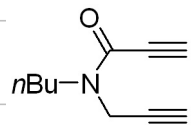

1c  
<sup>1</sup>H NMR  
400MHz CDCl<sub>3</sub>

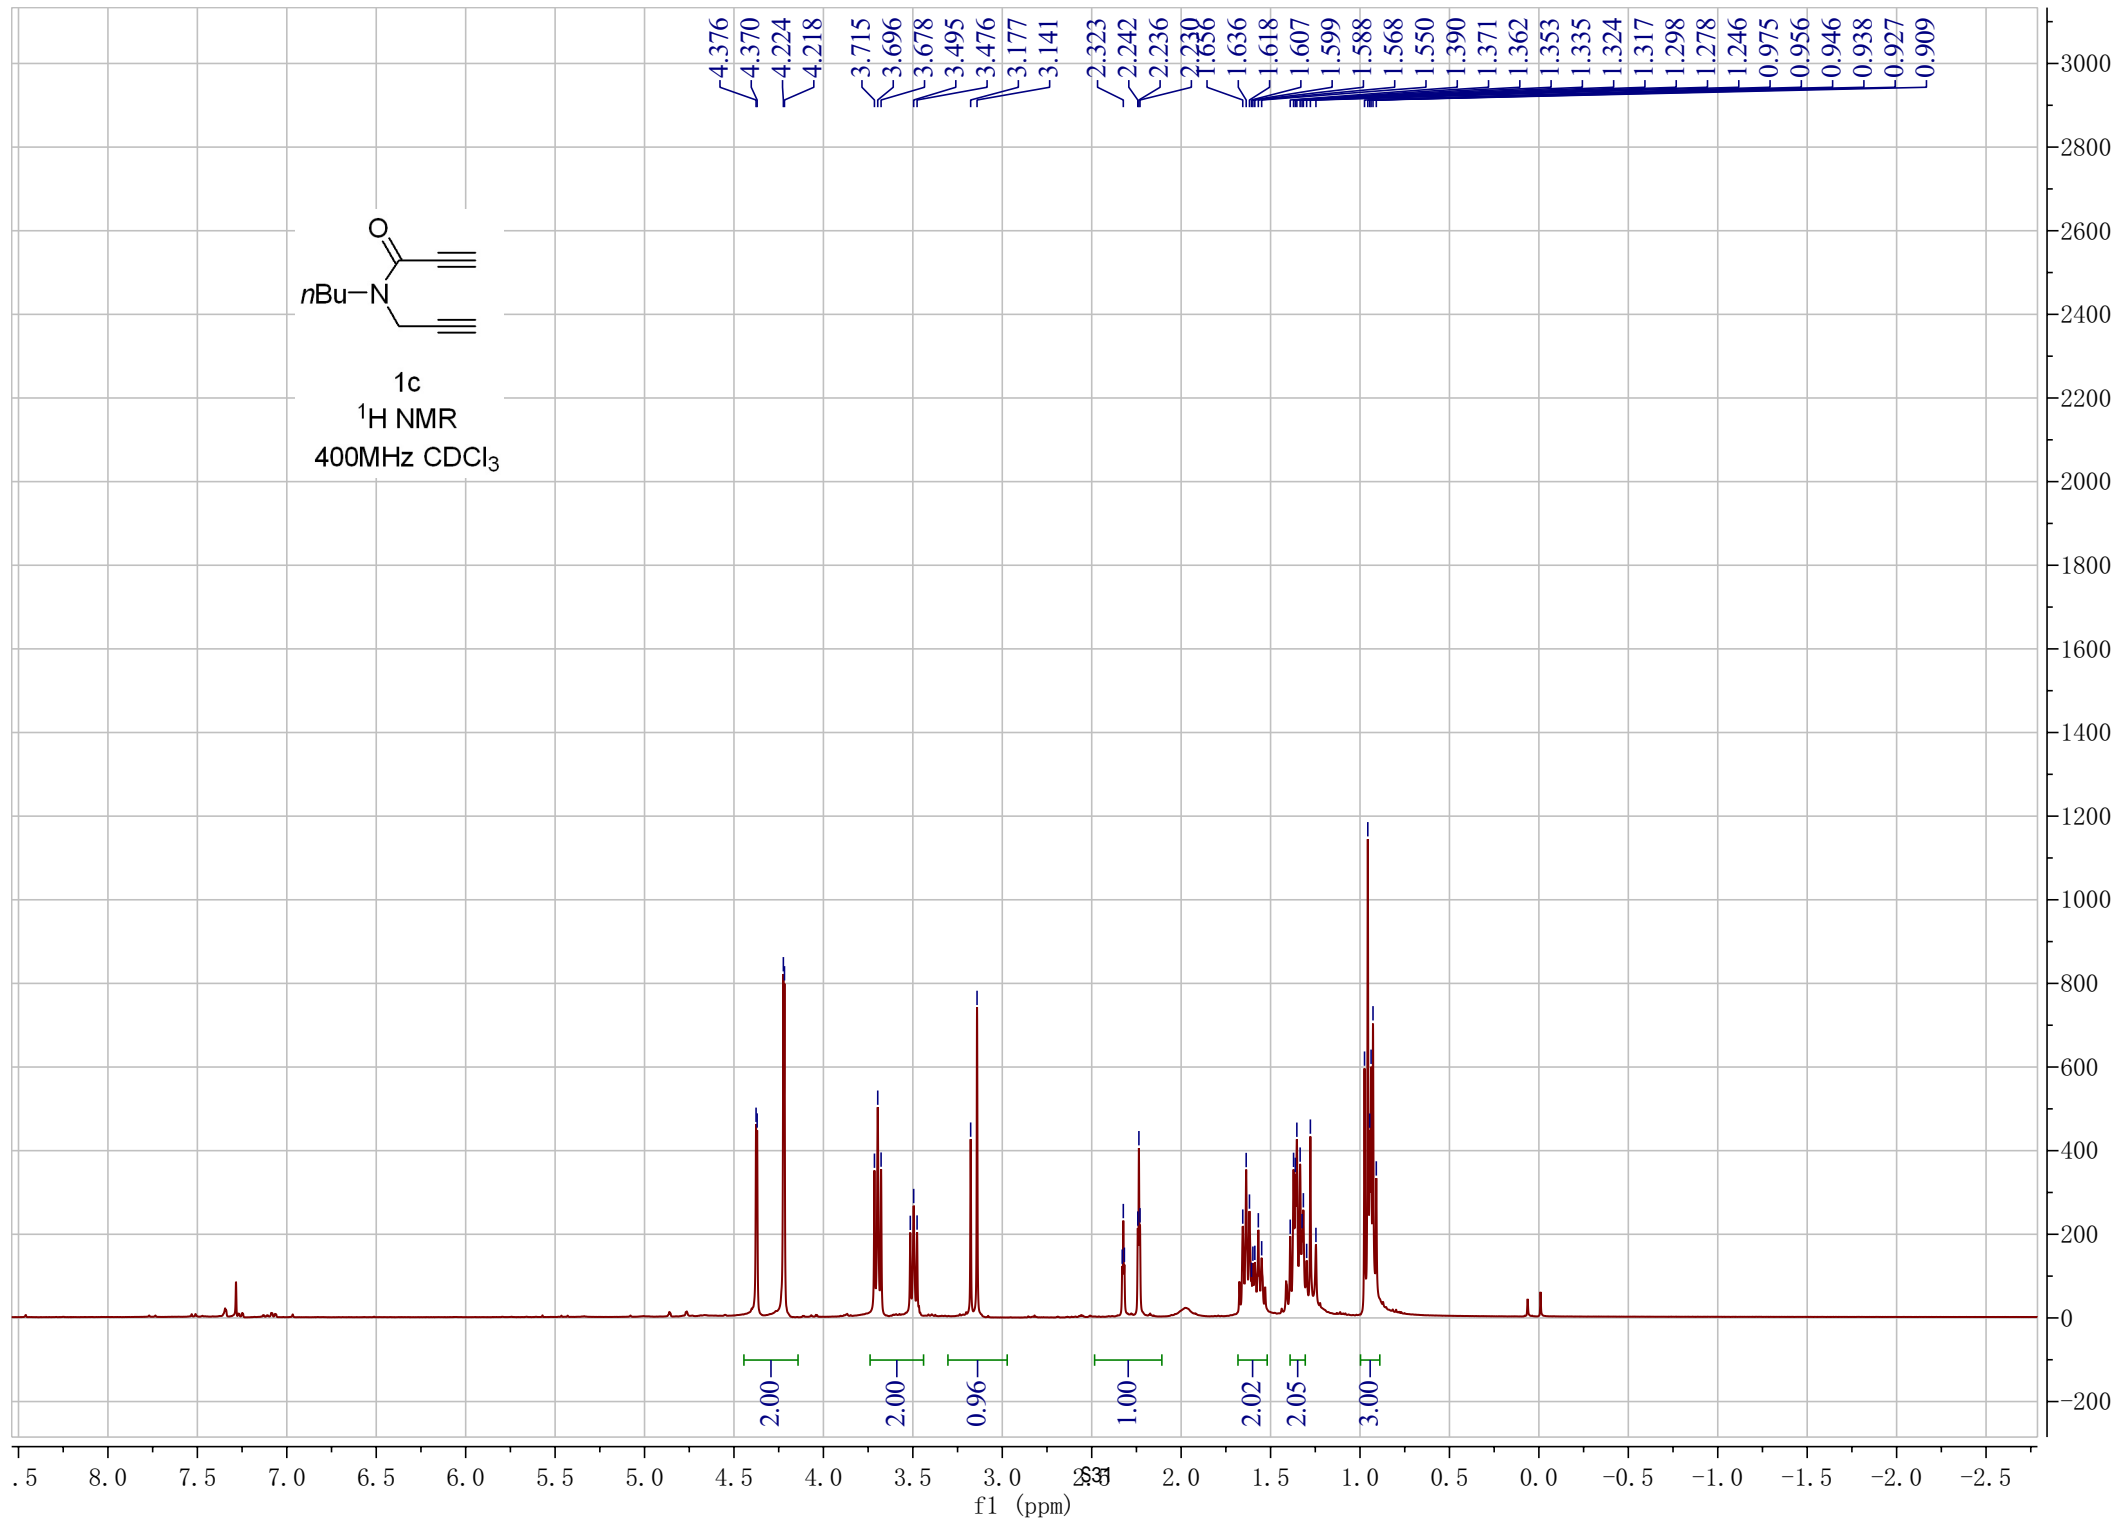

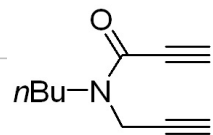

1c  
<sup>13</sup>C NMR  
100MHz CDCl<sub>3</sub>

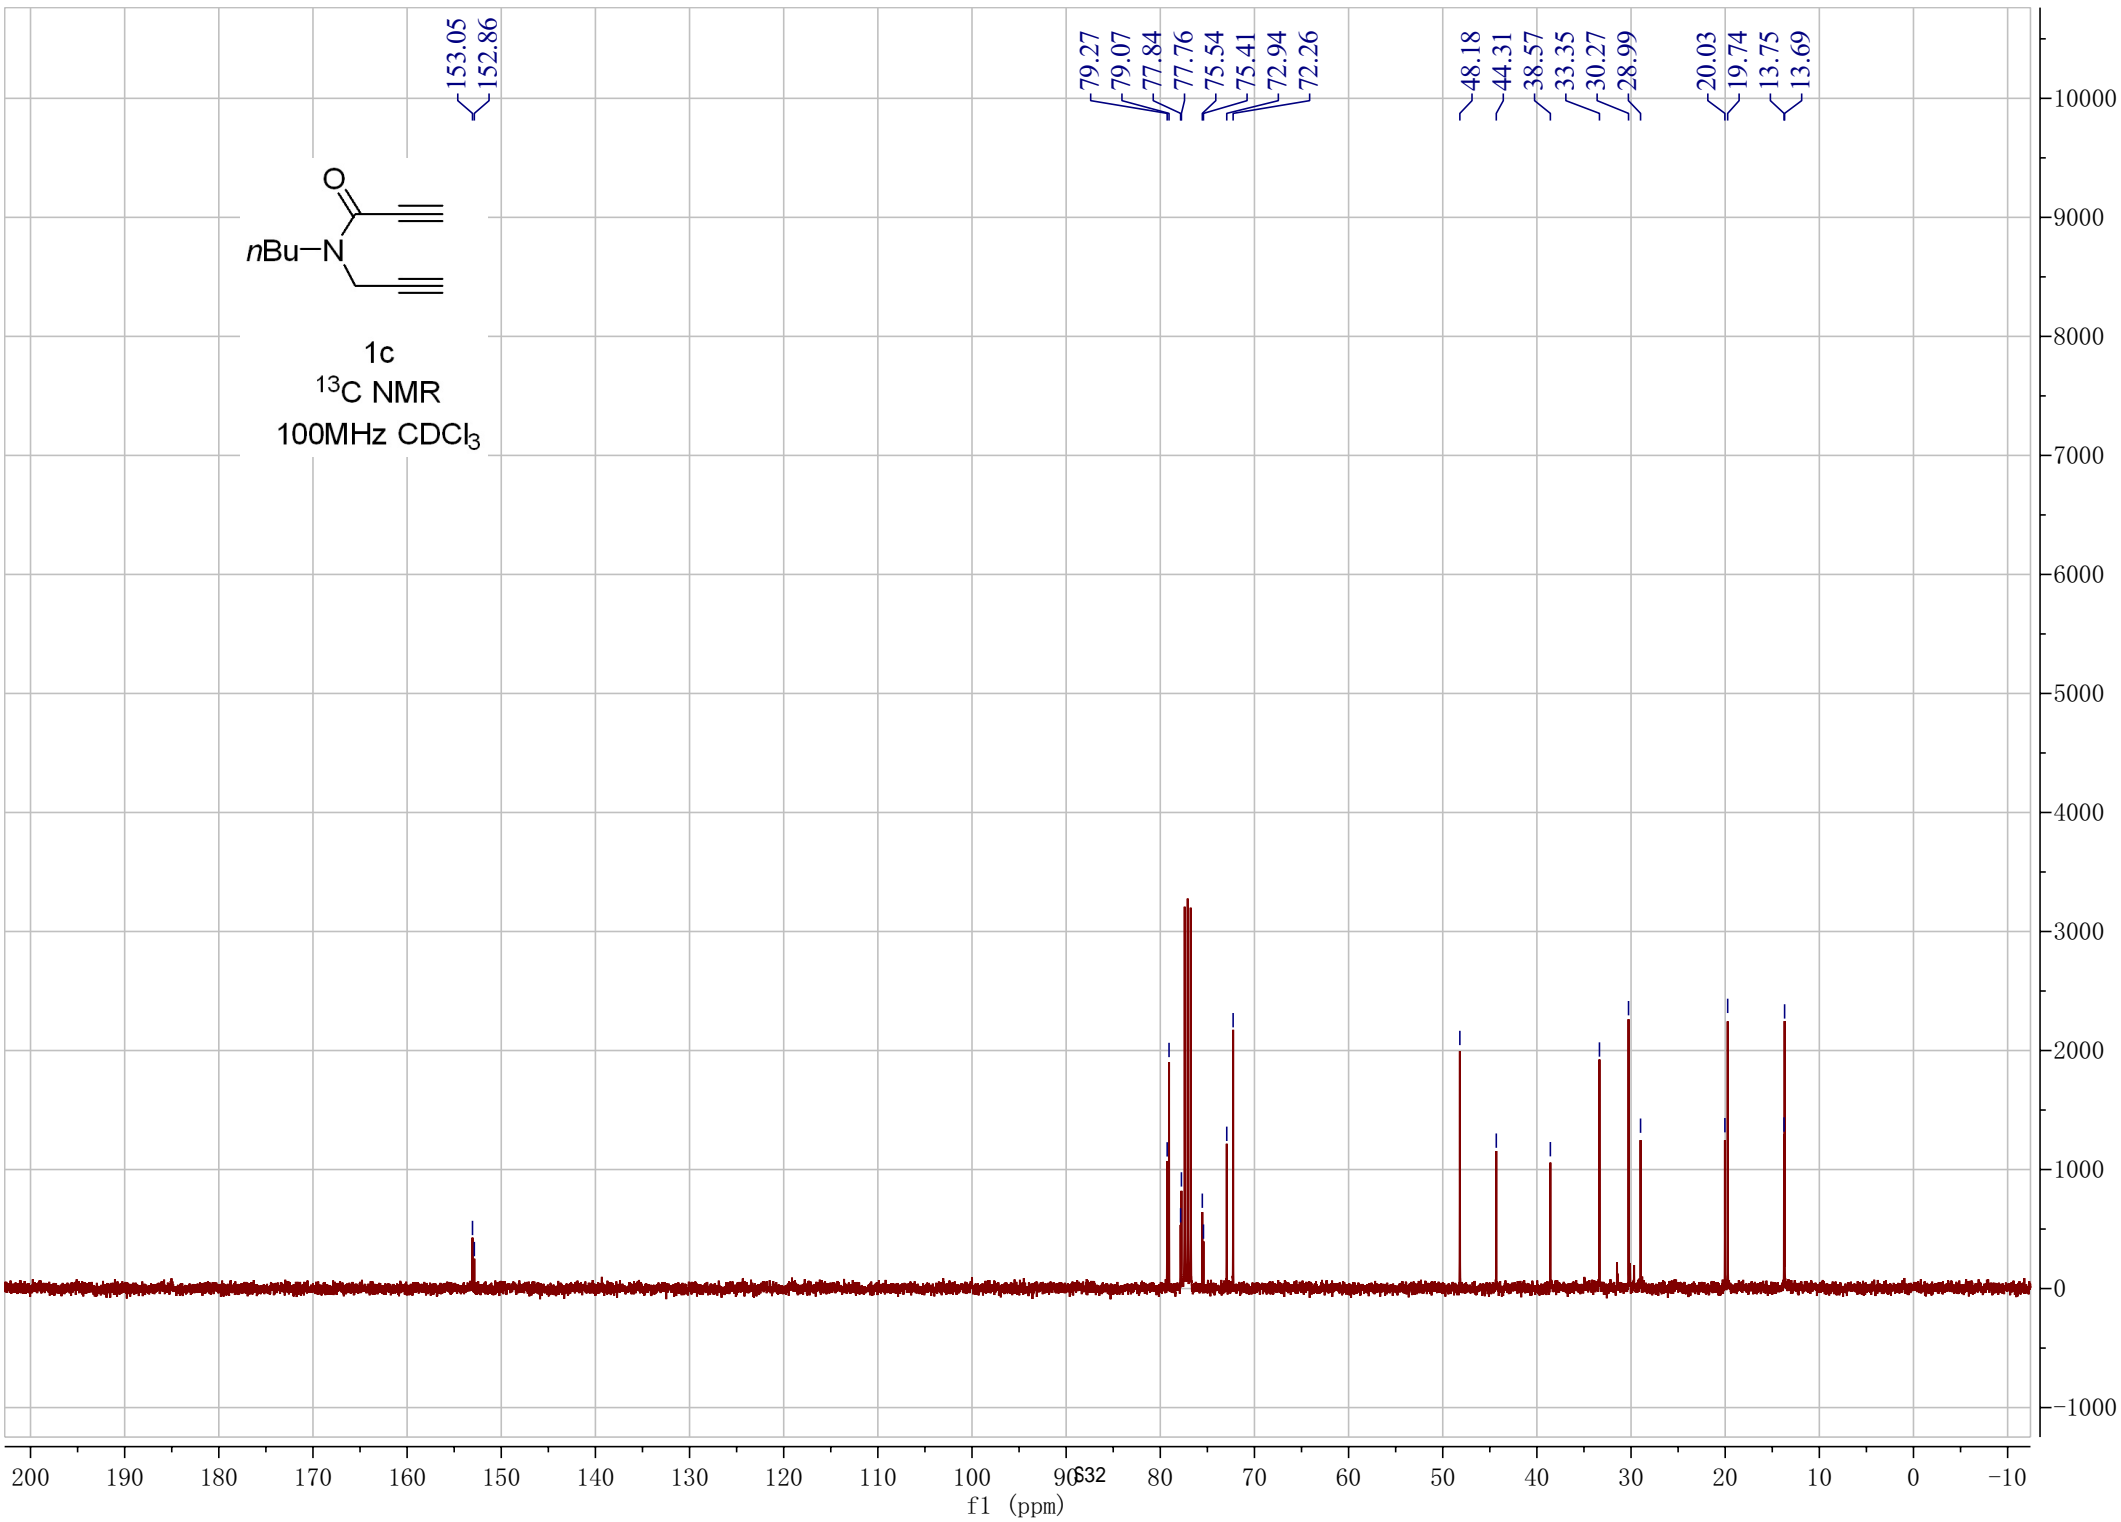



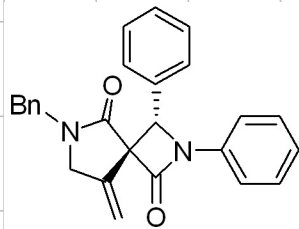

3aa

<sup>1</sup>H NMR  
400MHz CDCl<sub>3</sub>

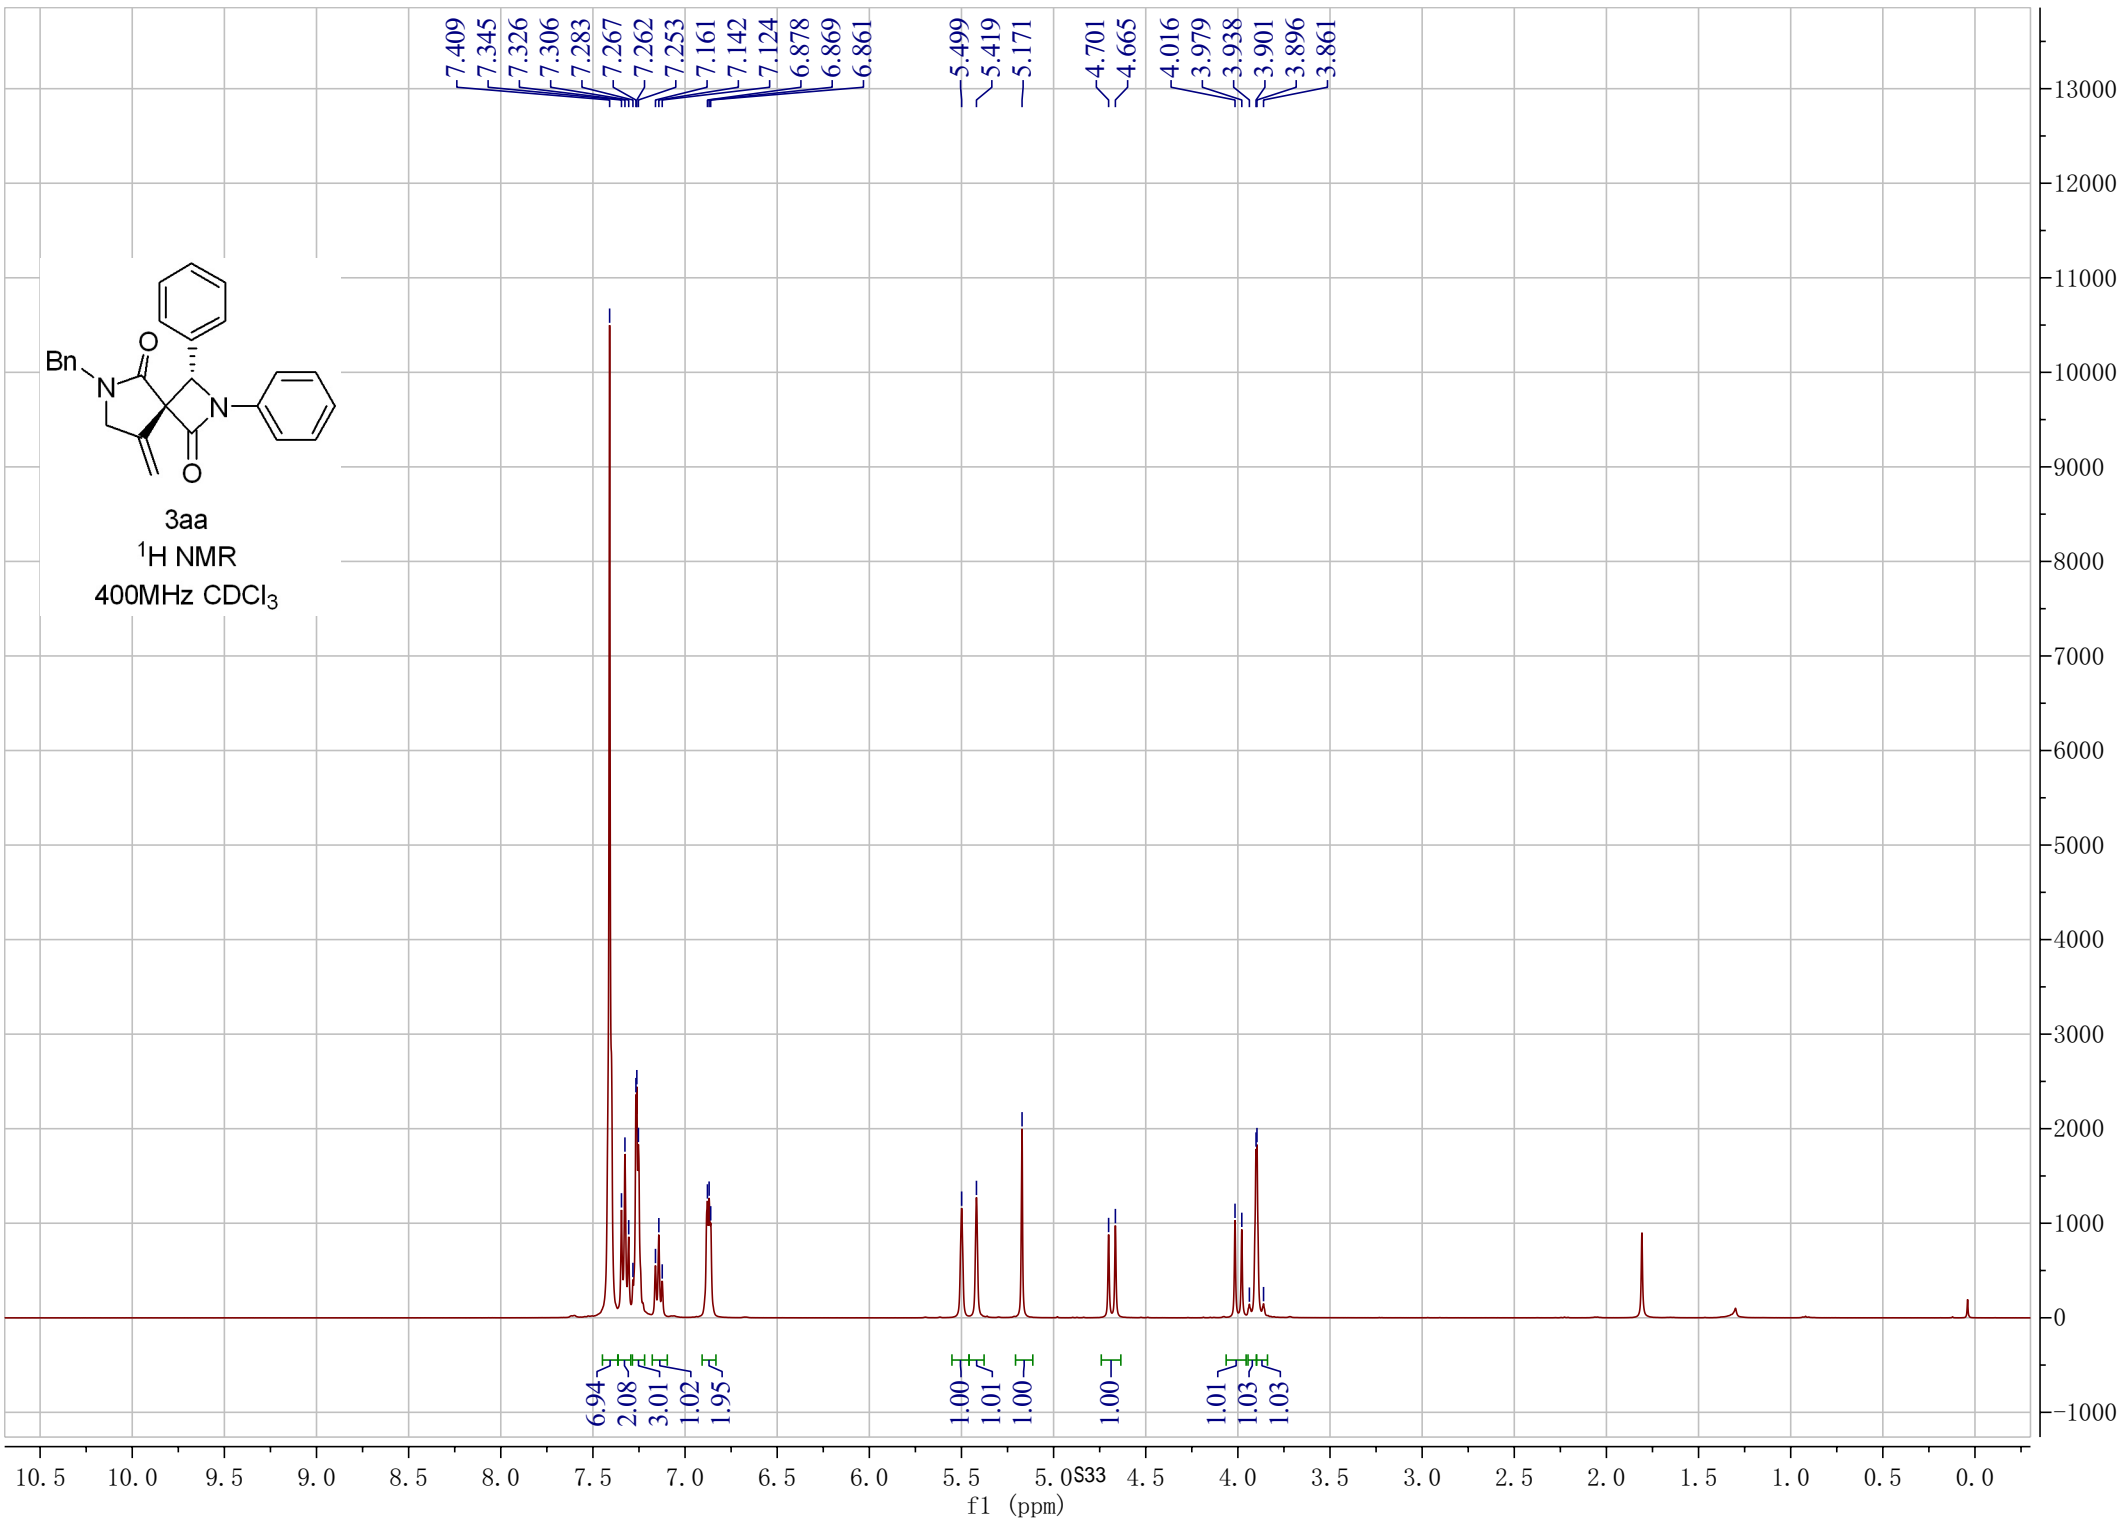

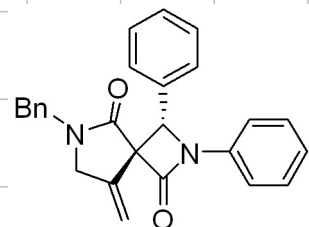

3aa

$^{13}\text{C}$ NMR

100M,  $\text{CDCl}_3$

166.48  
162.41  
138.21  
137.06  
135.48  
132.43  
129.16  
128.90  
128.69  
128.34  
128.00  
127.68  
127.59  
124.49  
117.69  
112.11

70.17  
69.37

50.17  
46.46

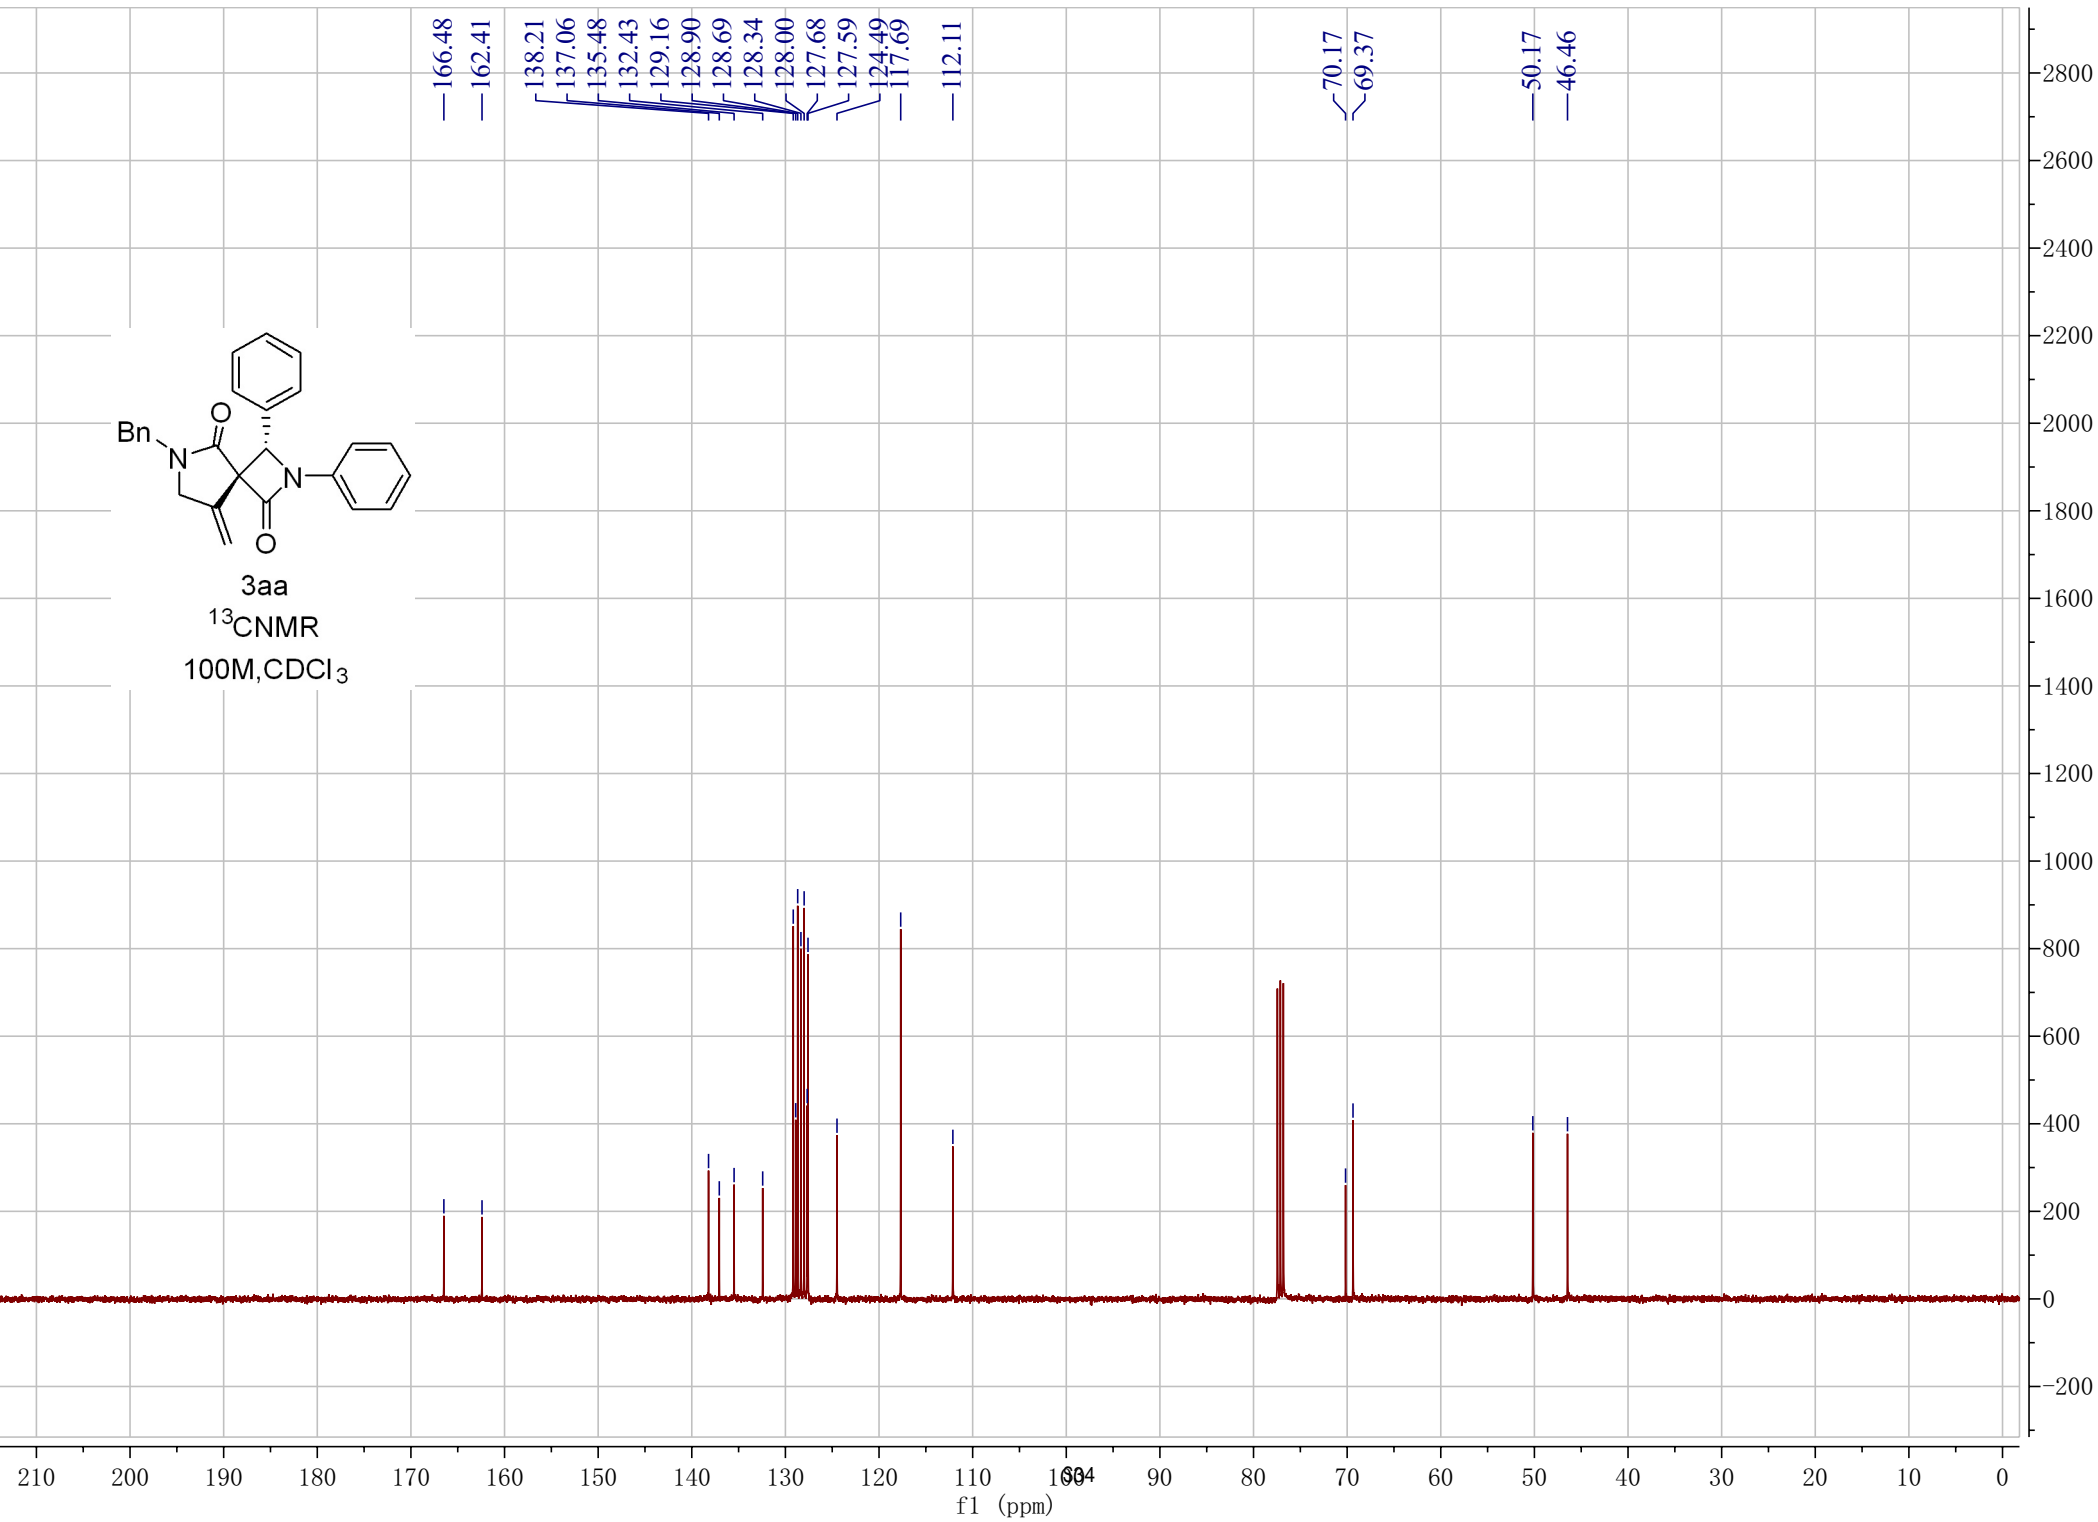

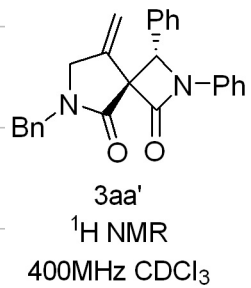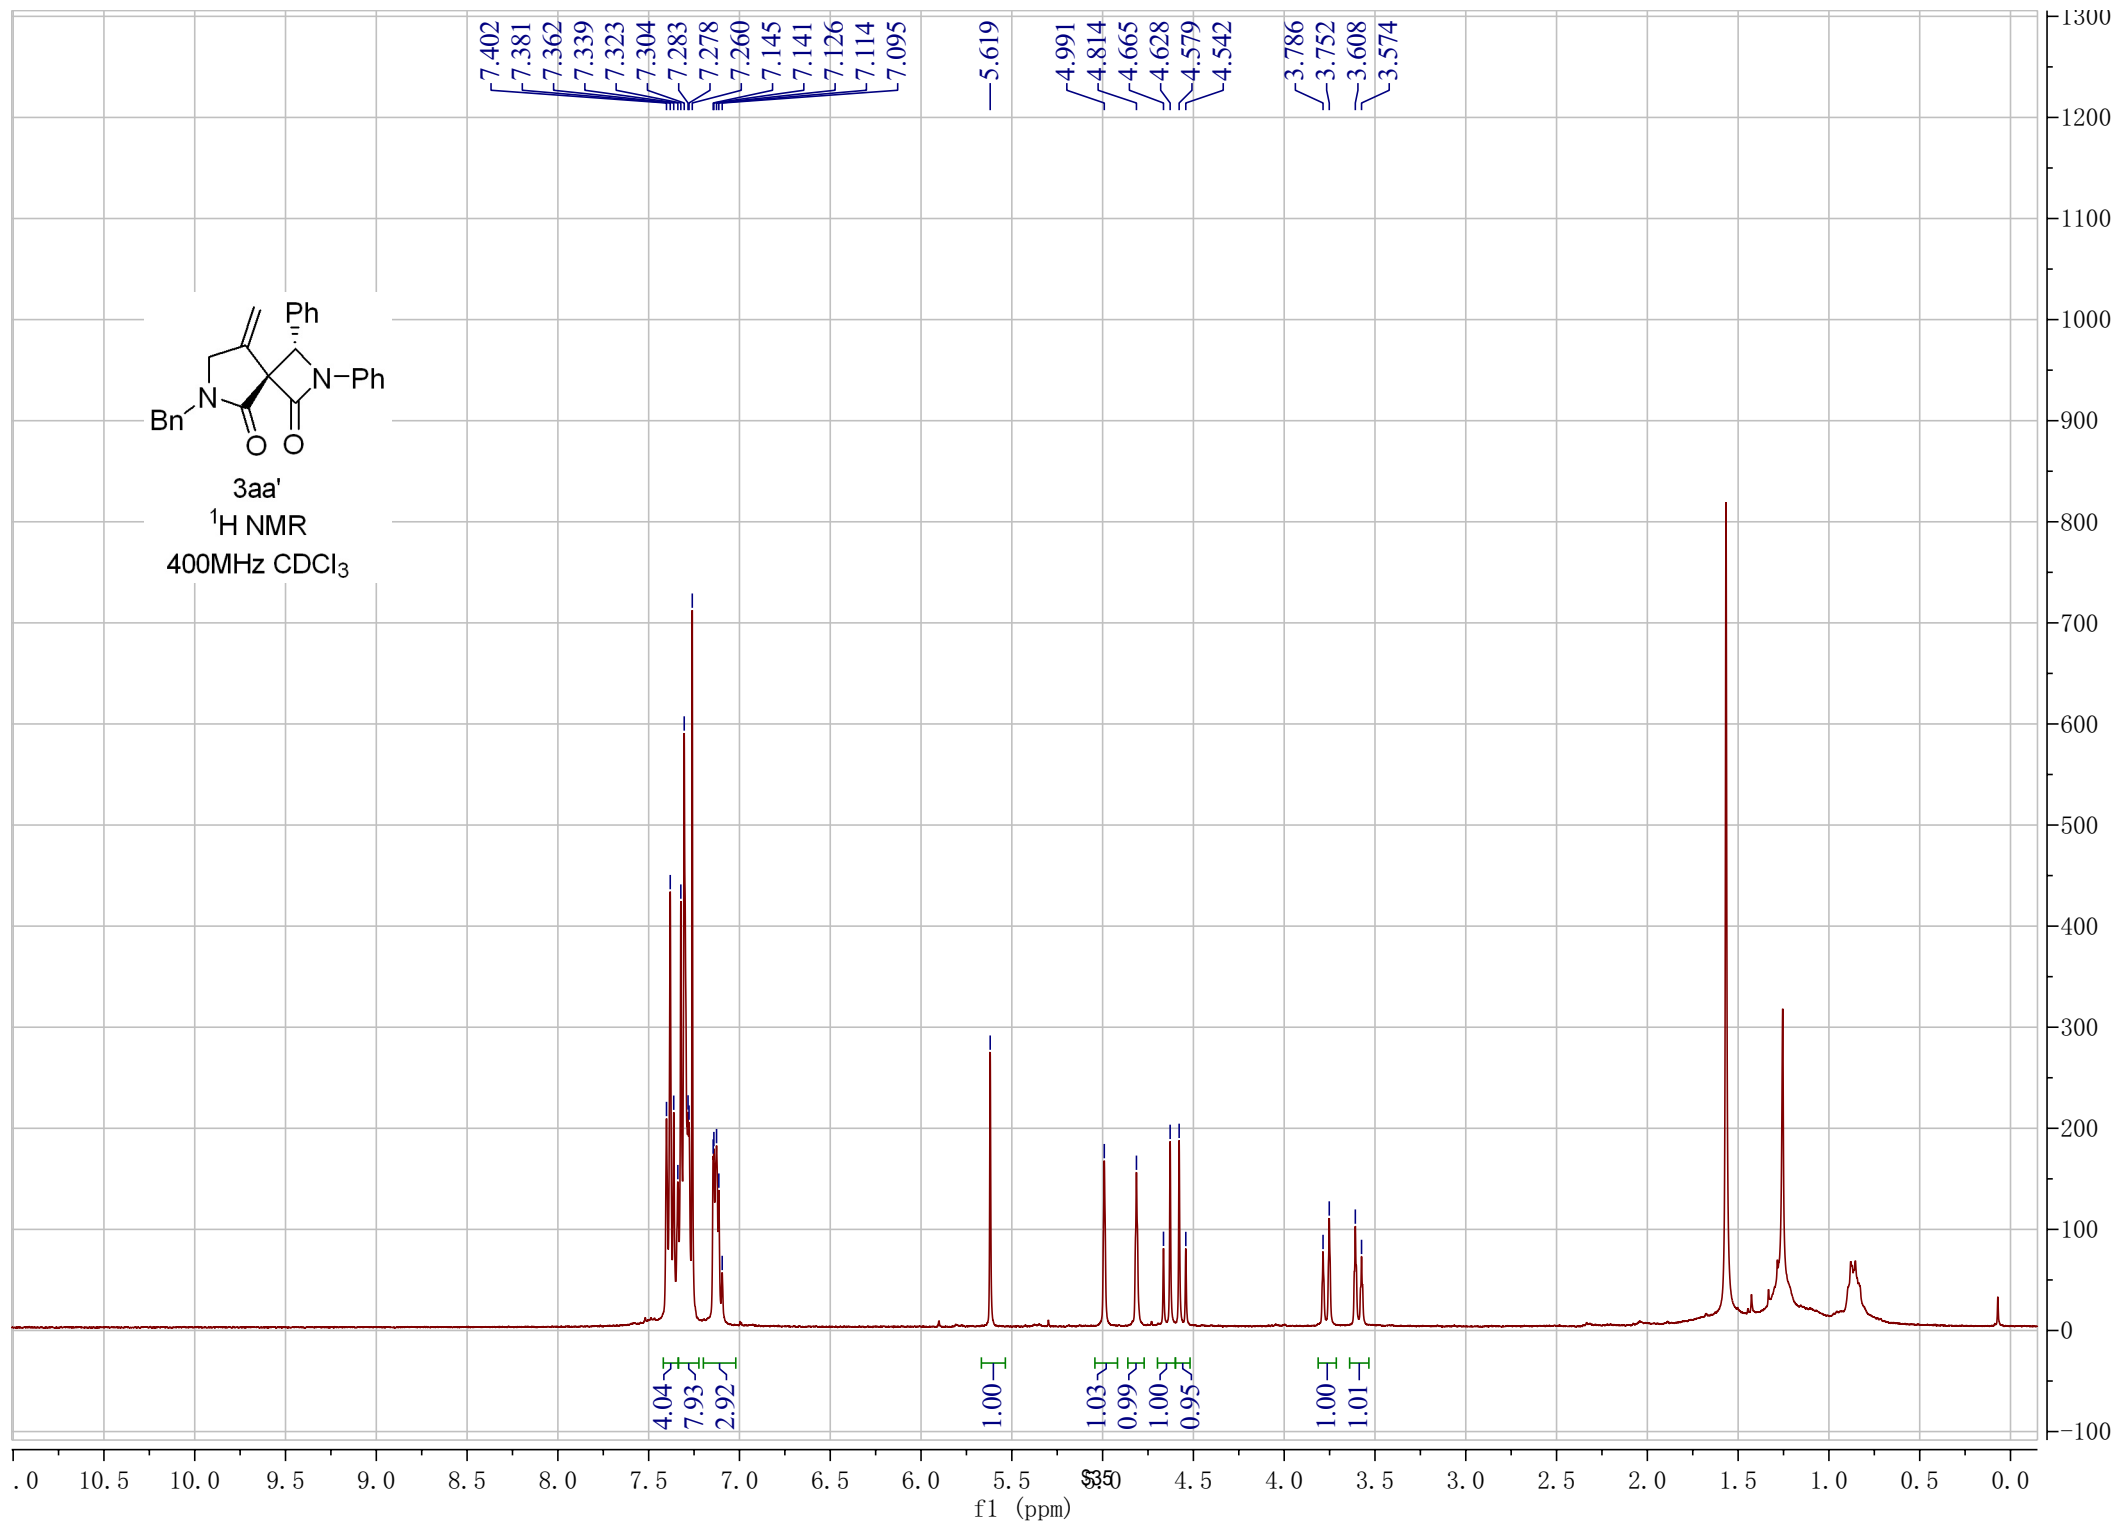

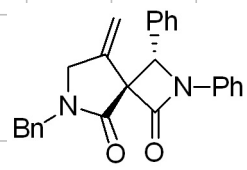

3aa'

<sup>13</sup>C NMR

100MHz CDCl<sub>3</sub>

169.45

162.12

137.13

135.42

133.54

133.03

129.08

128.95

128.75

128.50

128.20

128.01

126.91

124.46

117.66

115.49

70.13

64.36

50.59

46.96

210 200 190 180 170 160 150 140 130 120 110 100 90 80 70 60 50 40 30 20 10 0 -10

f1 (ppm)

S36

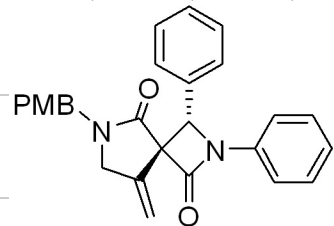

**3ba**  
**<sup>1</sup>H NMR**  
**400M, CDCl<sub>3</sub>**

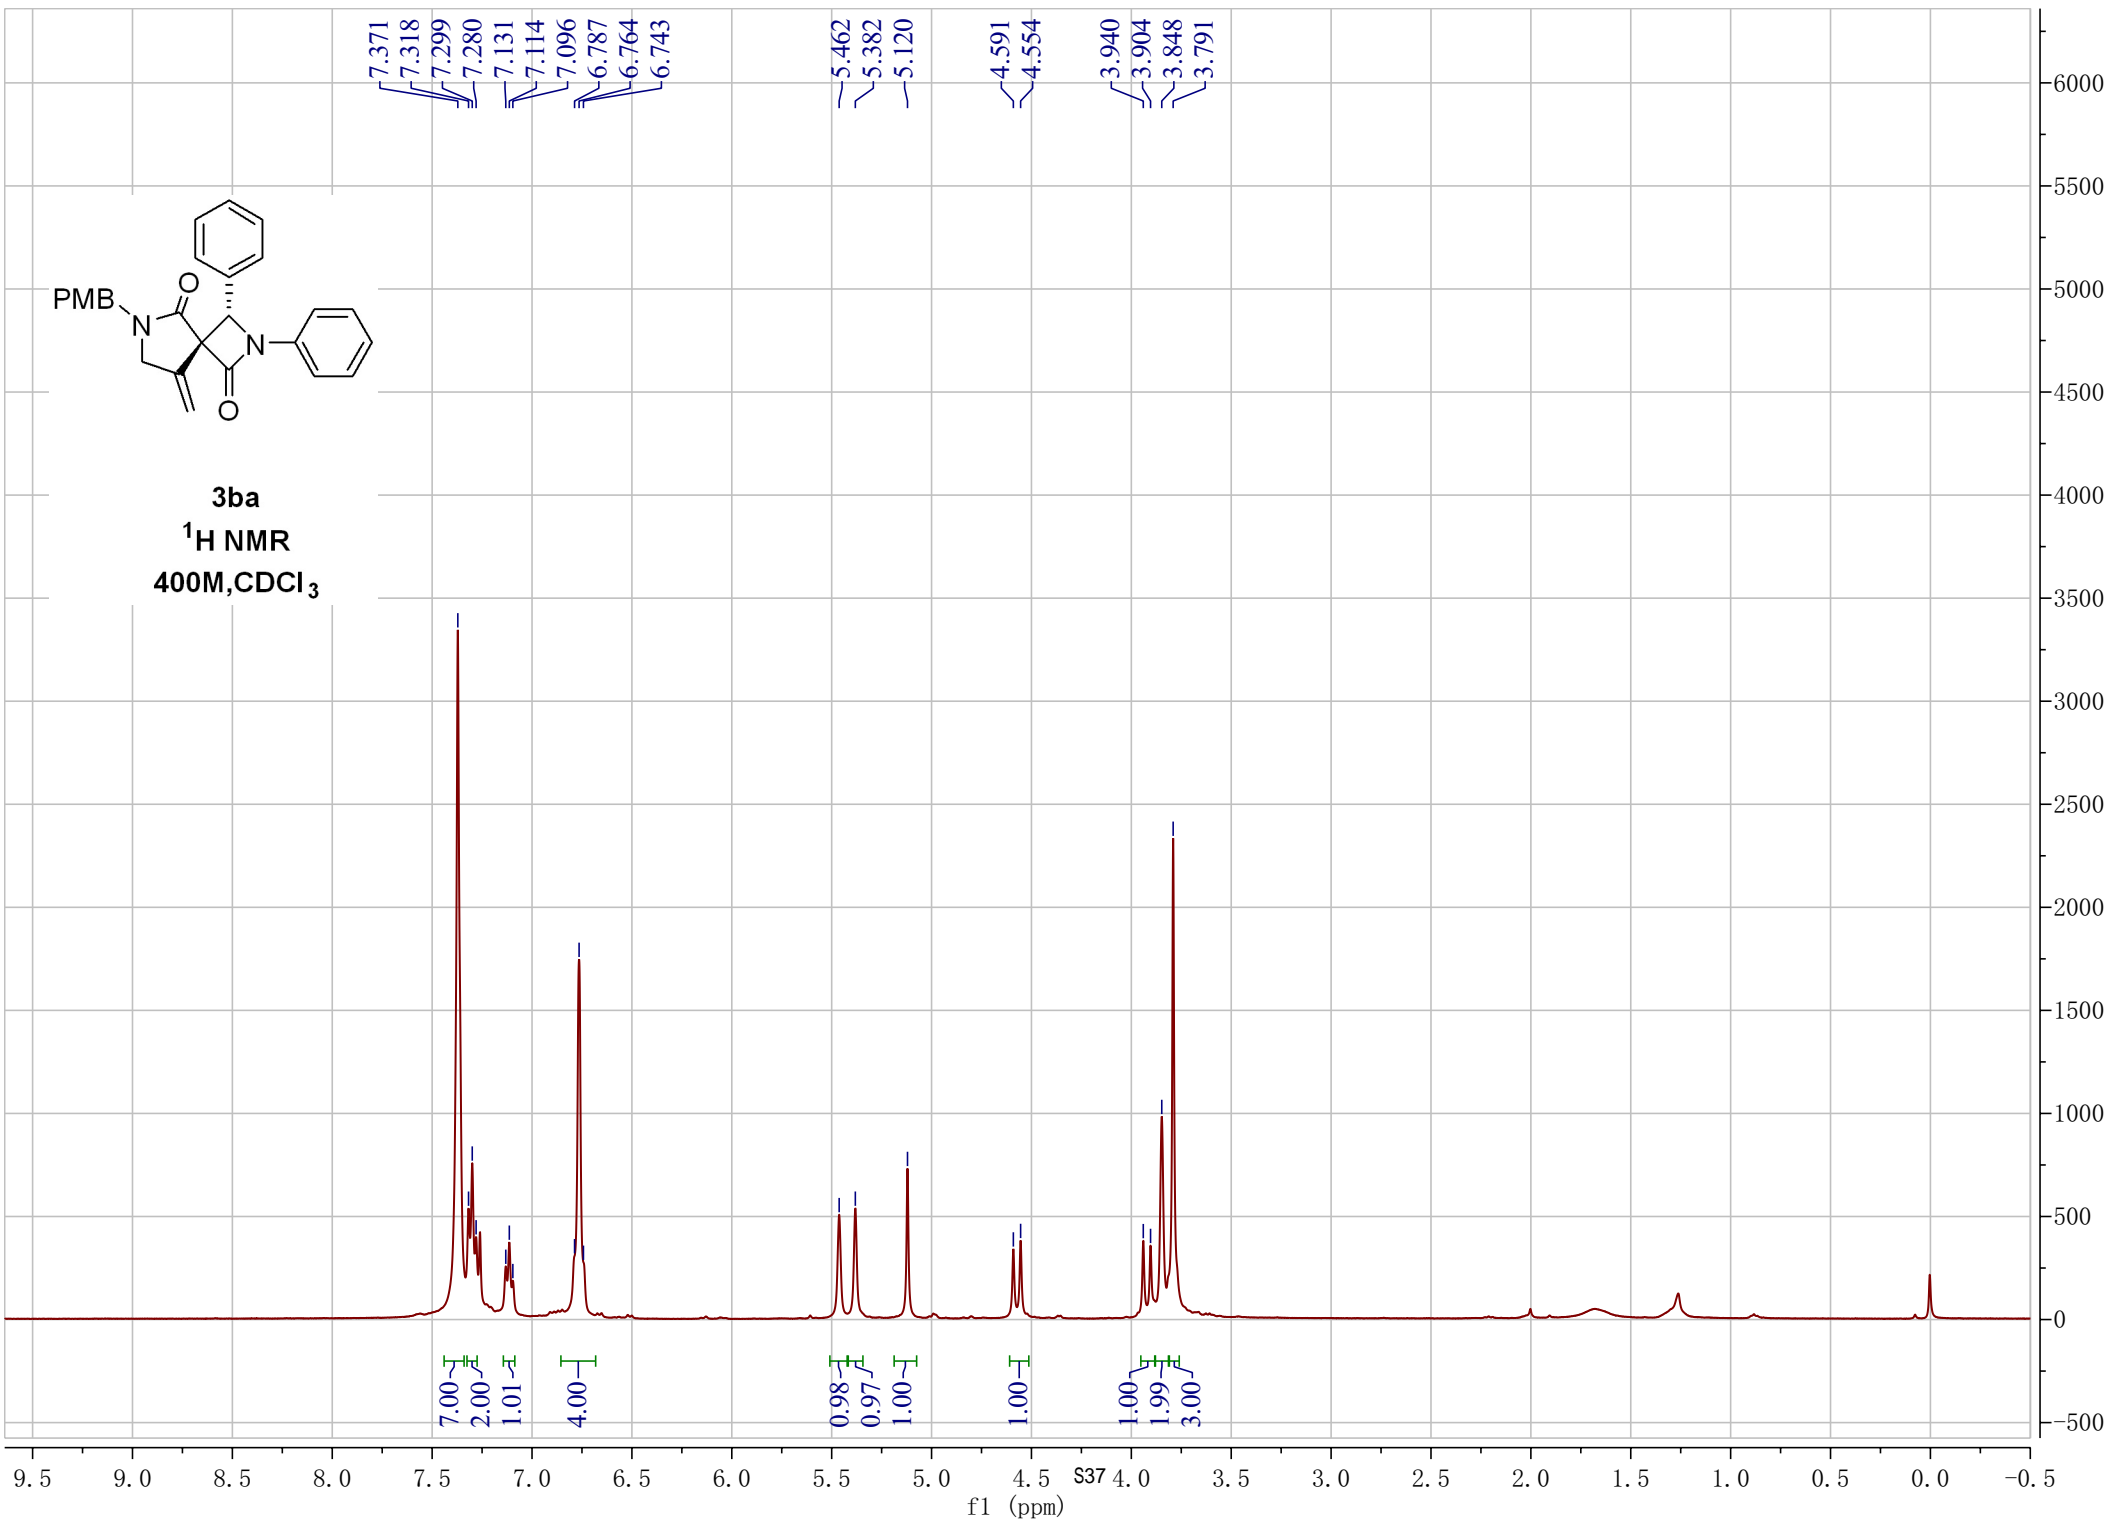

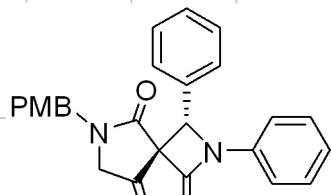

**3ba**  
**<sup>13</sup>CNMR**  
**100M, CDCl<sub>3</sub>**

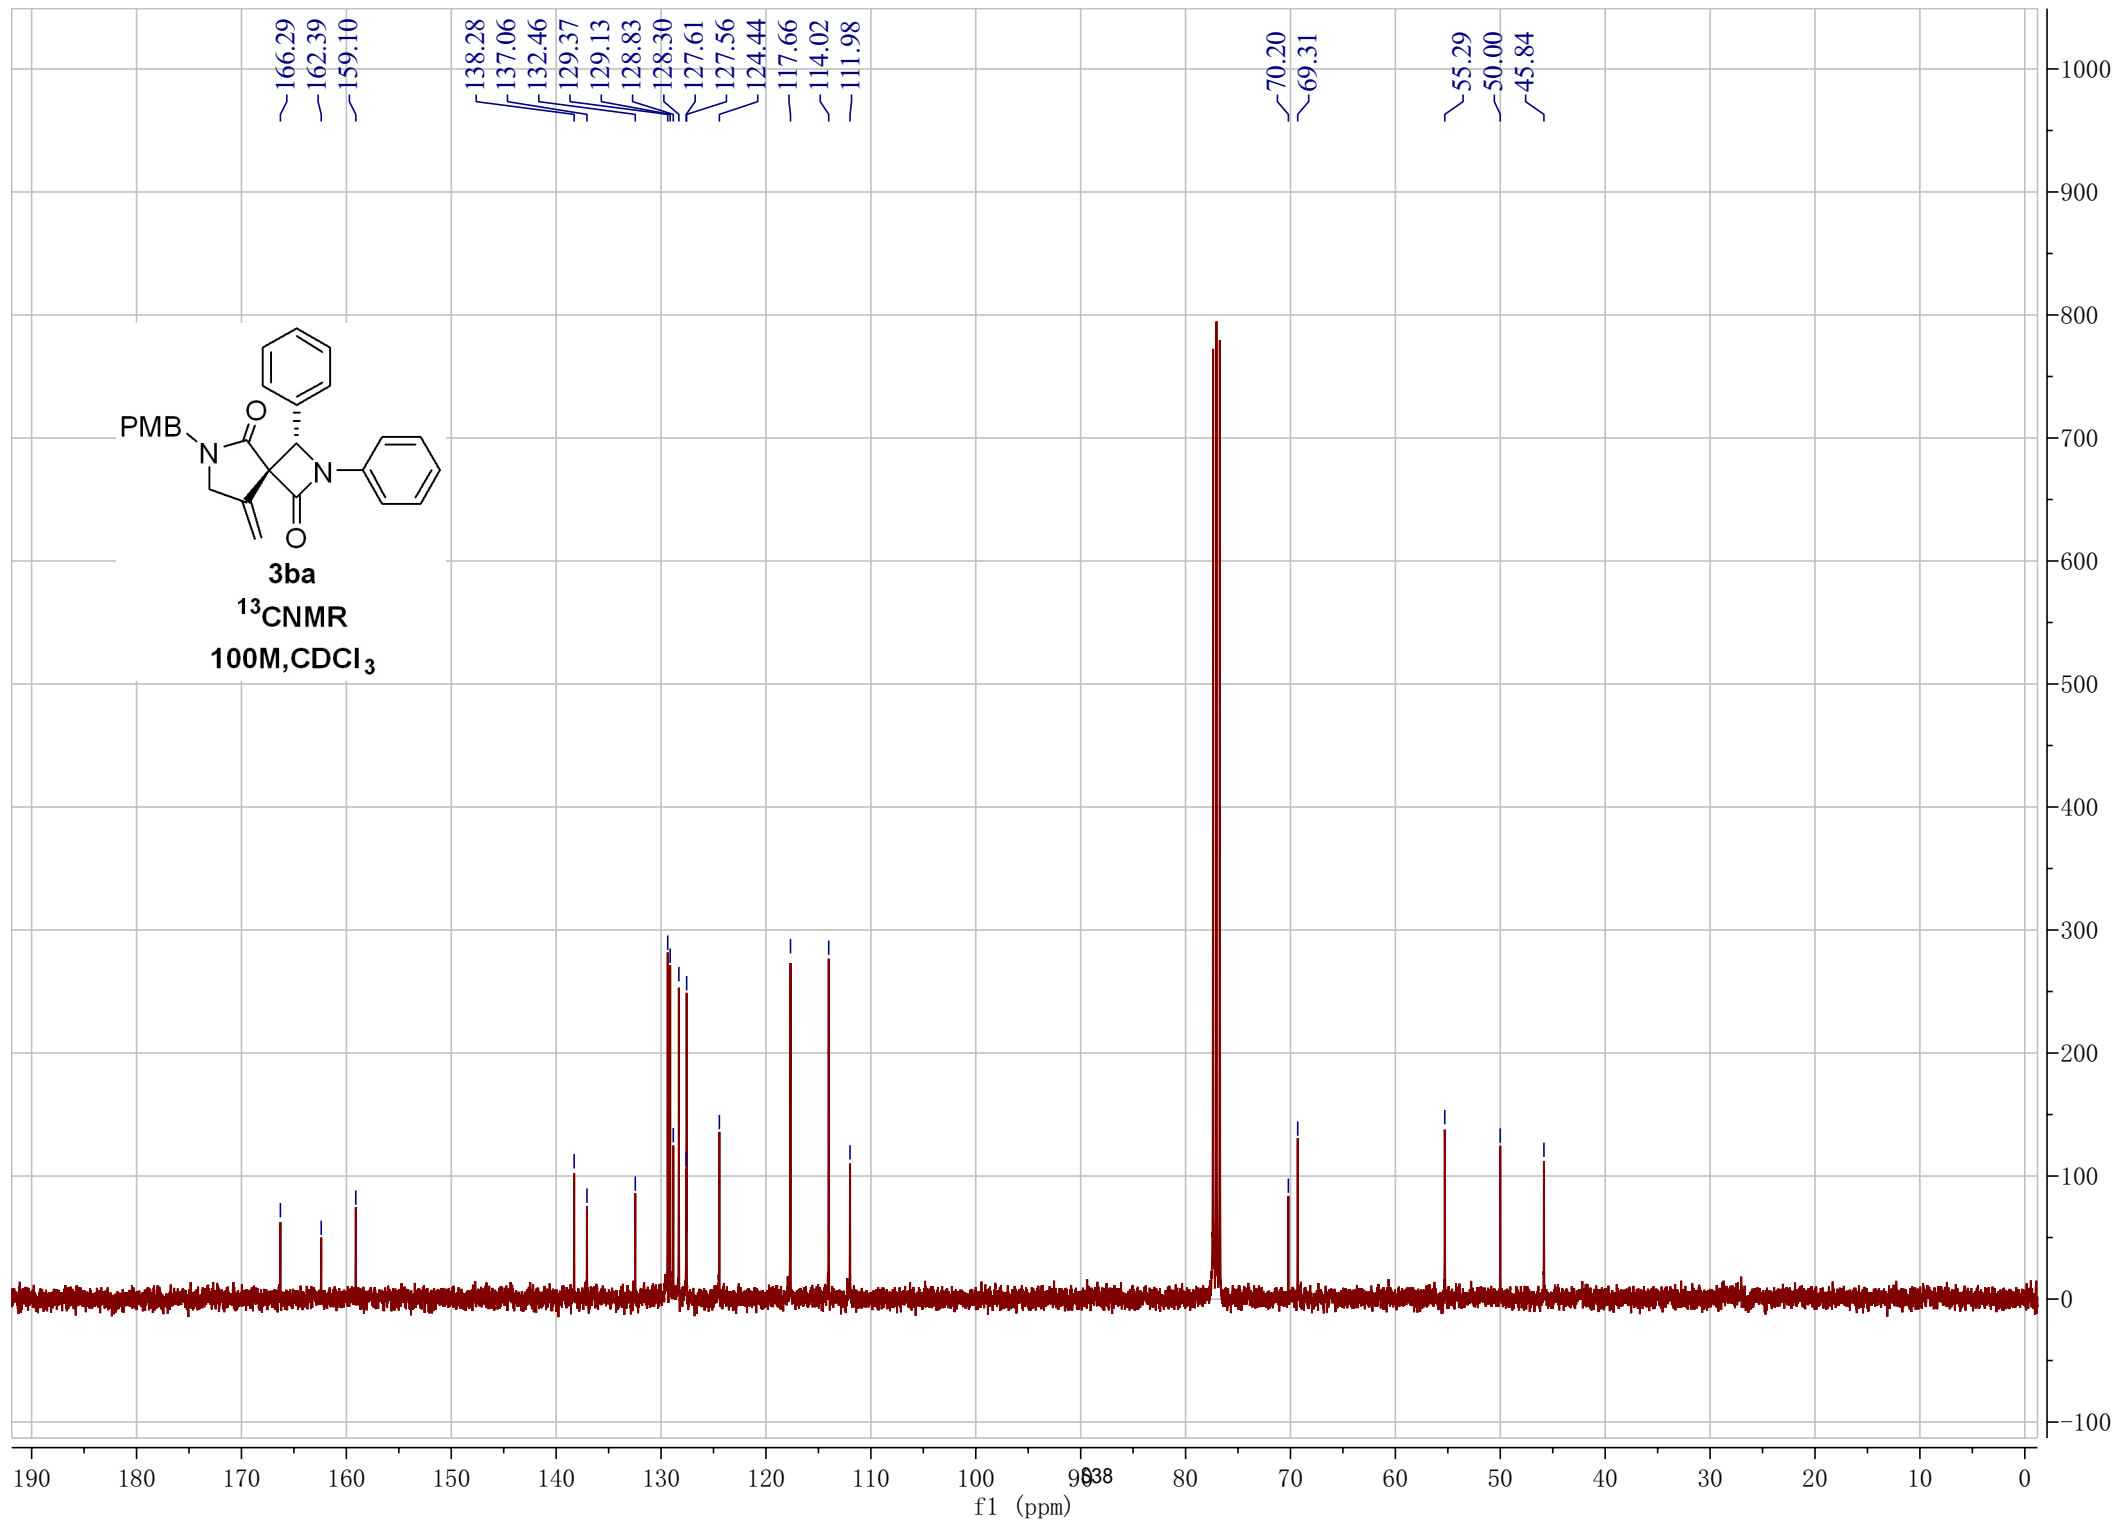

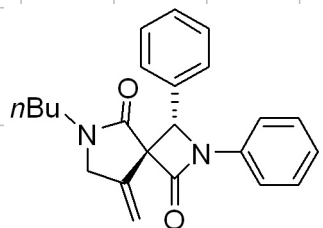

3ca

<sup>1</sup>H NMR  
400 MHz, CDCl<sub>3</sub>

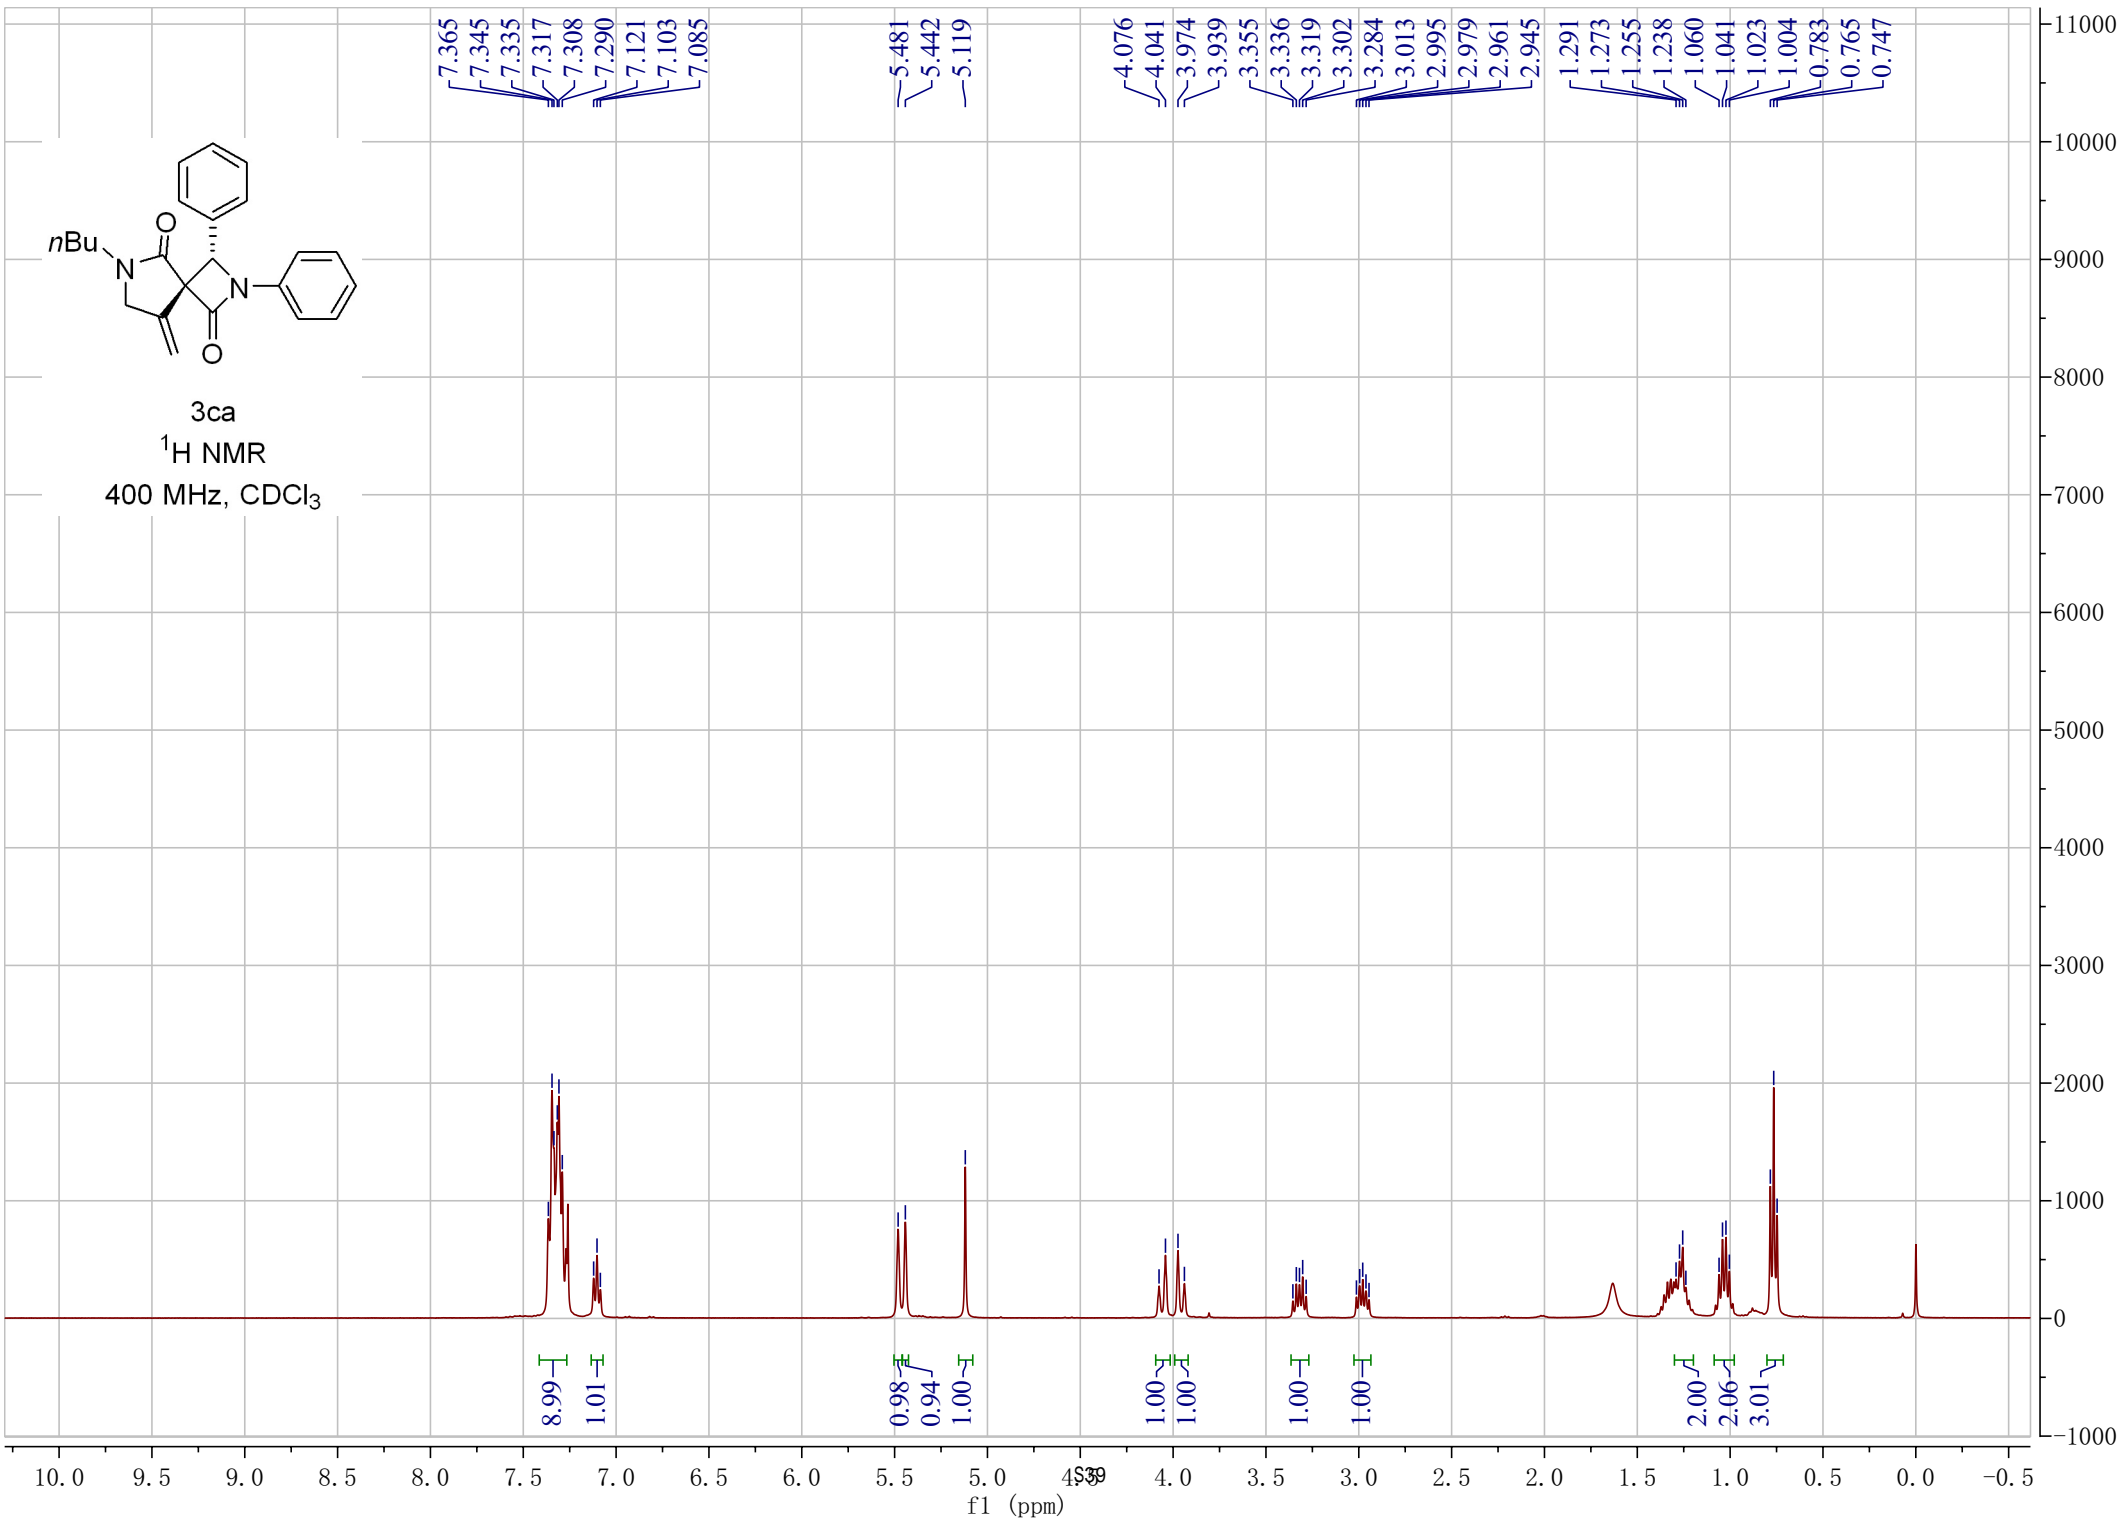

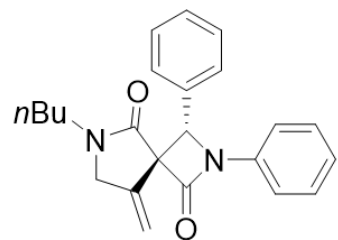

3ca  
<sup>13</sup>C NMR  
100MHz, CDCl<sub>3</sub>

166.17  
162.57  
138.60  
137.09  
132.48  
129.10  
128.73  
128.17  
127.42  
124.37  
117.64  
111.73

70.21  
69.06  
50.59  
42.14  
28.92  
19.53  
13.60

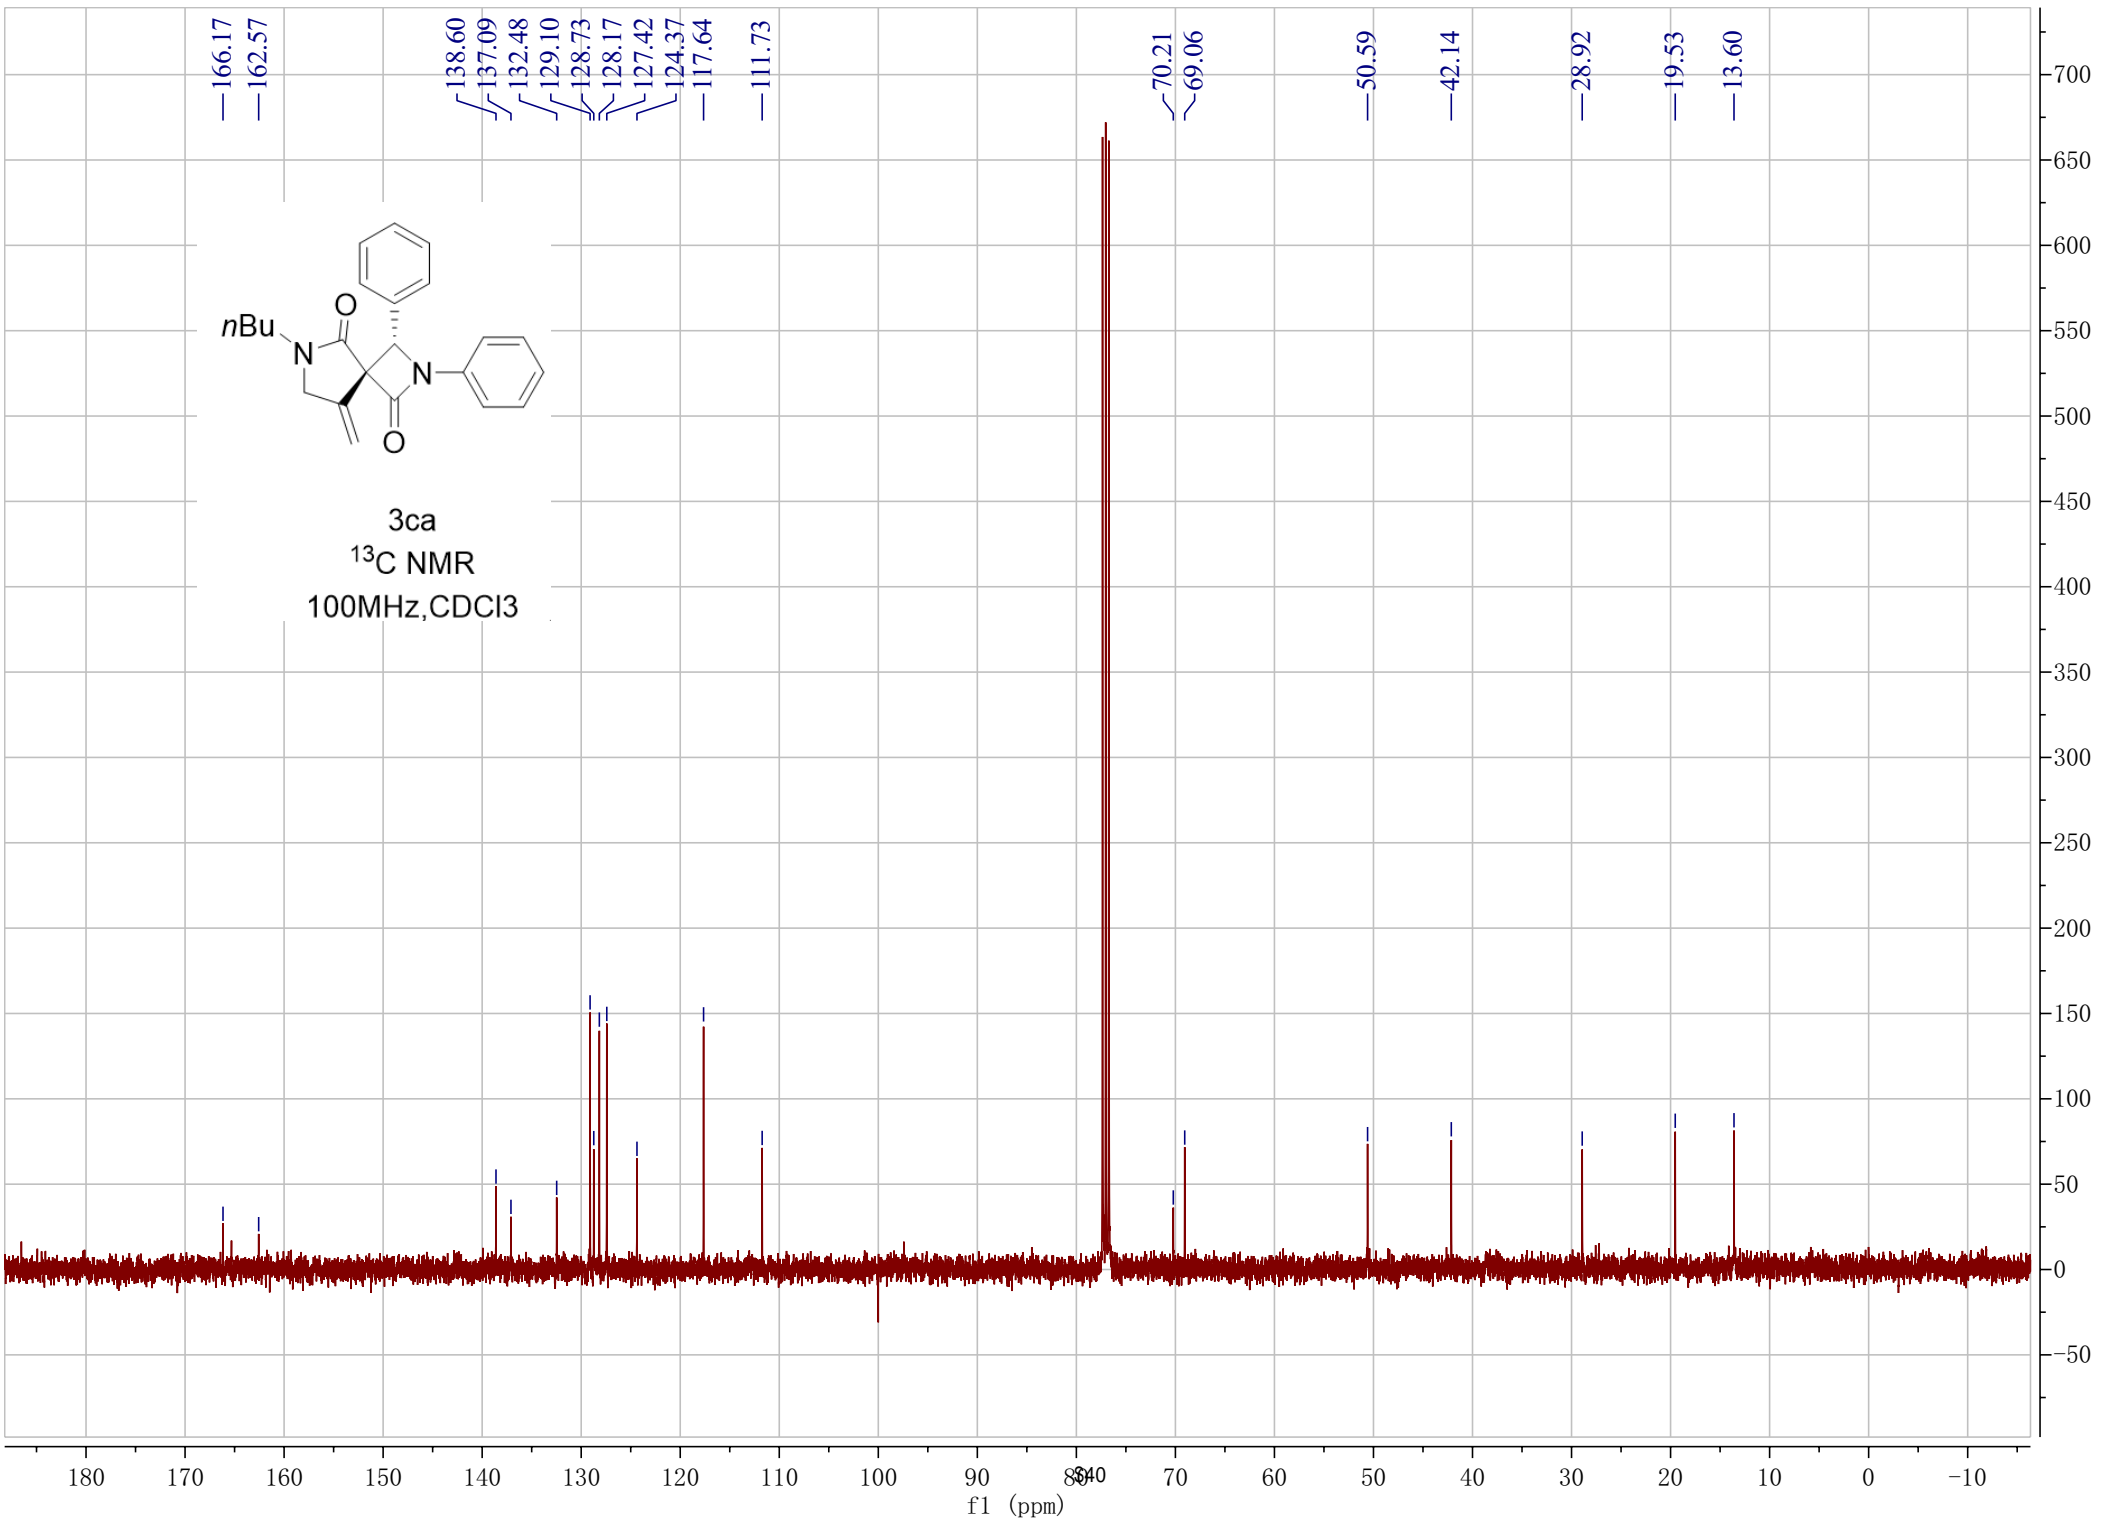



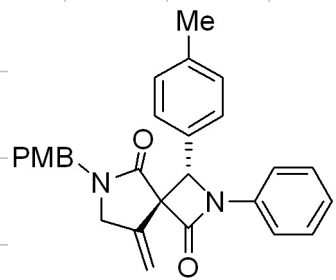

3bb  
<sup>1</sup>H NMR  
400MHz CDCl<sub>3</sub>

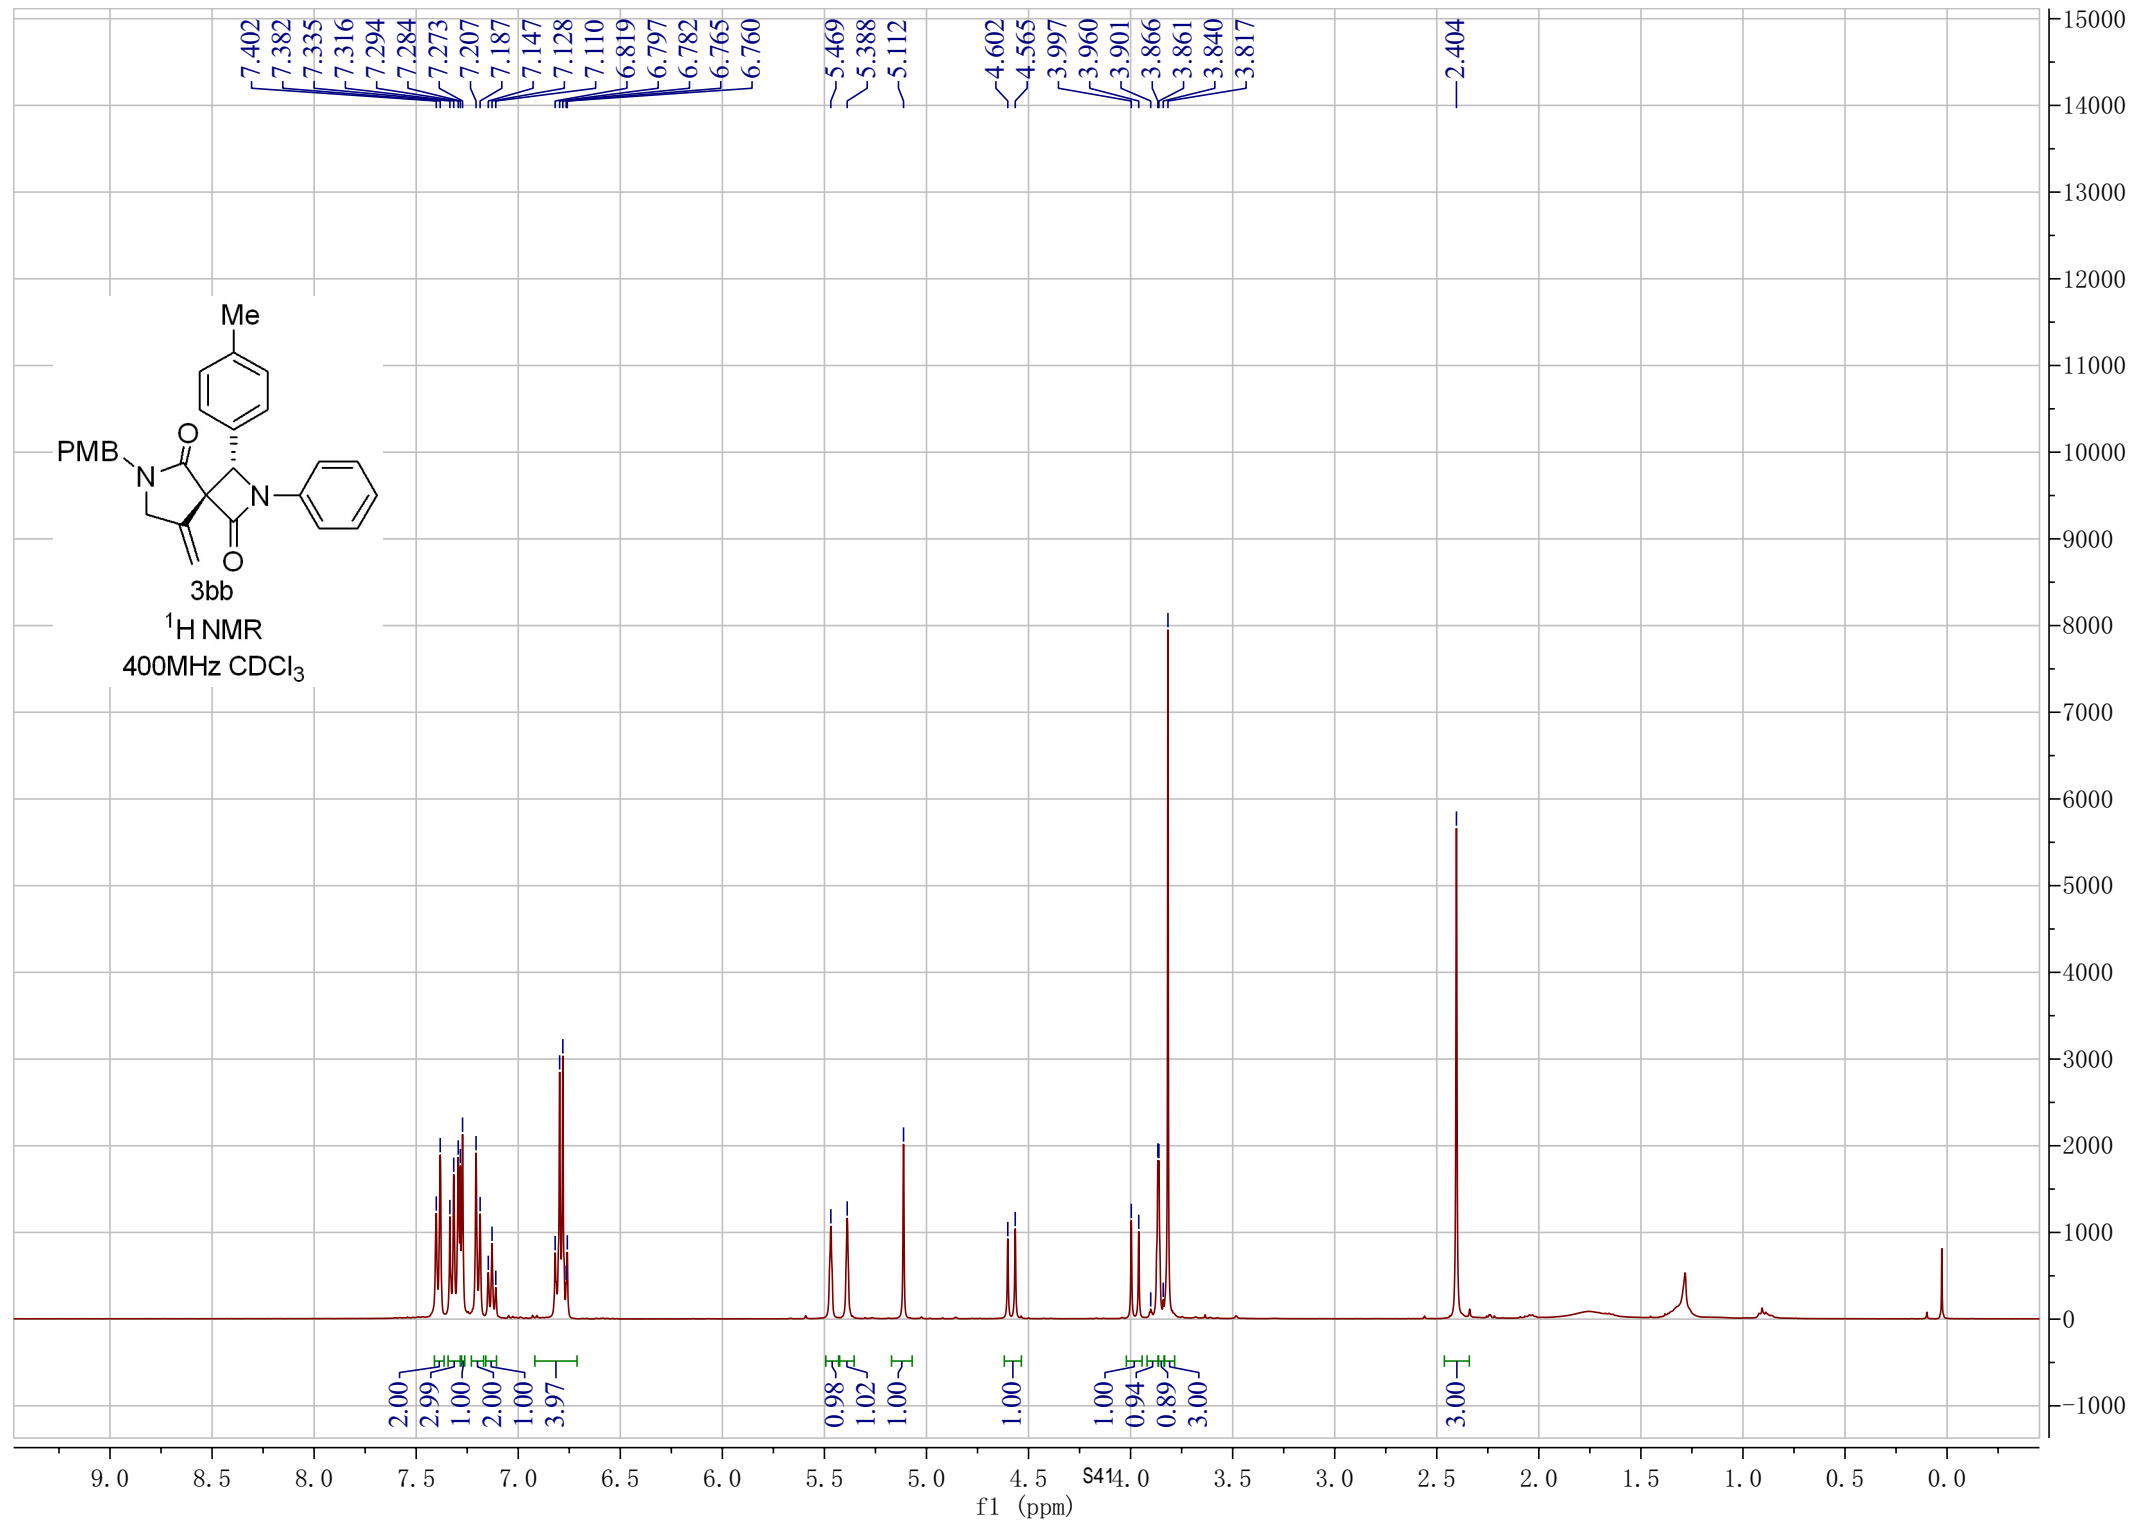

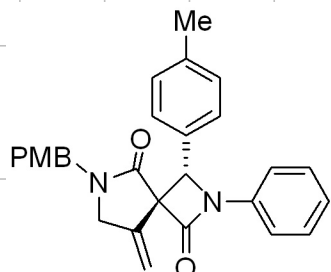

3bb

<sup>13</sup>CNMR  
100M, CDCl<sub>3</sub>

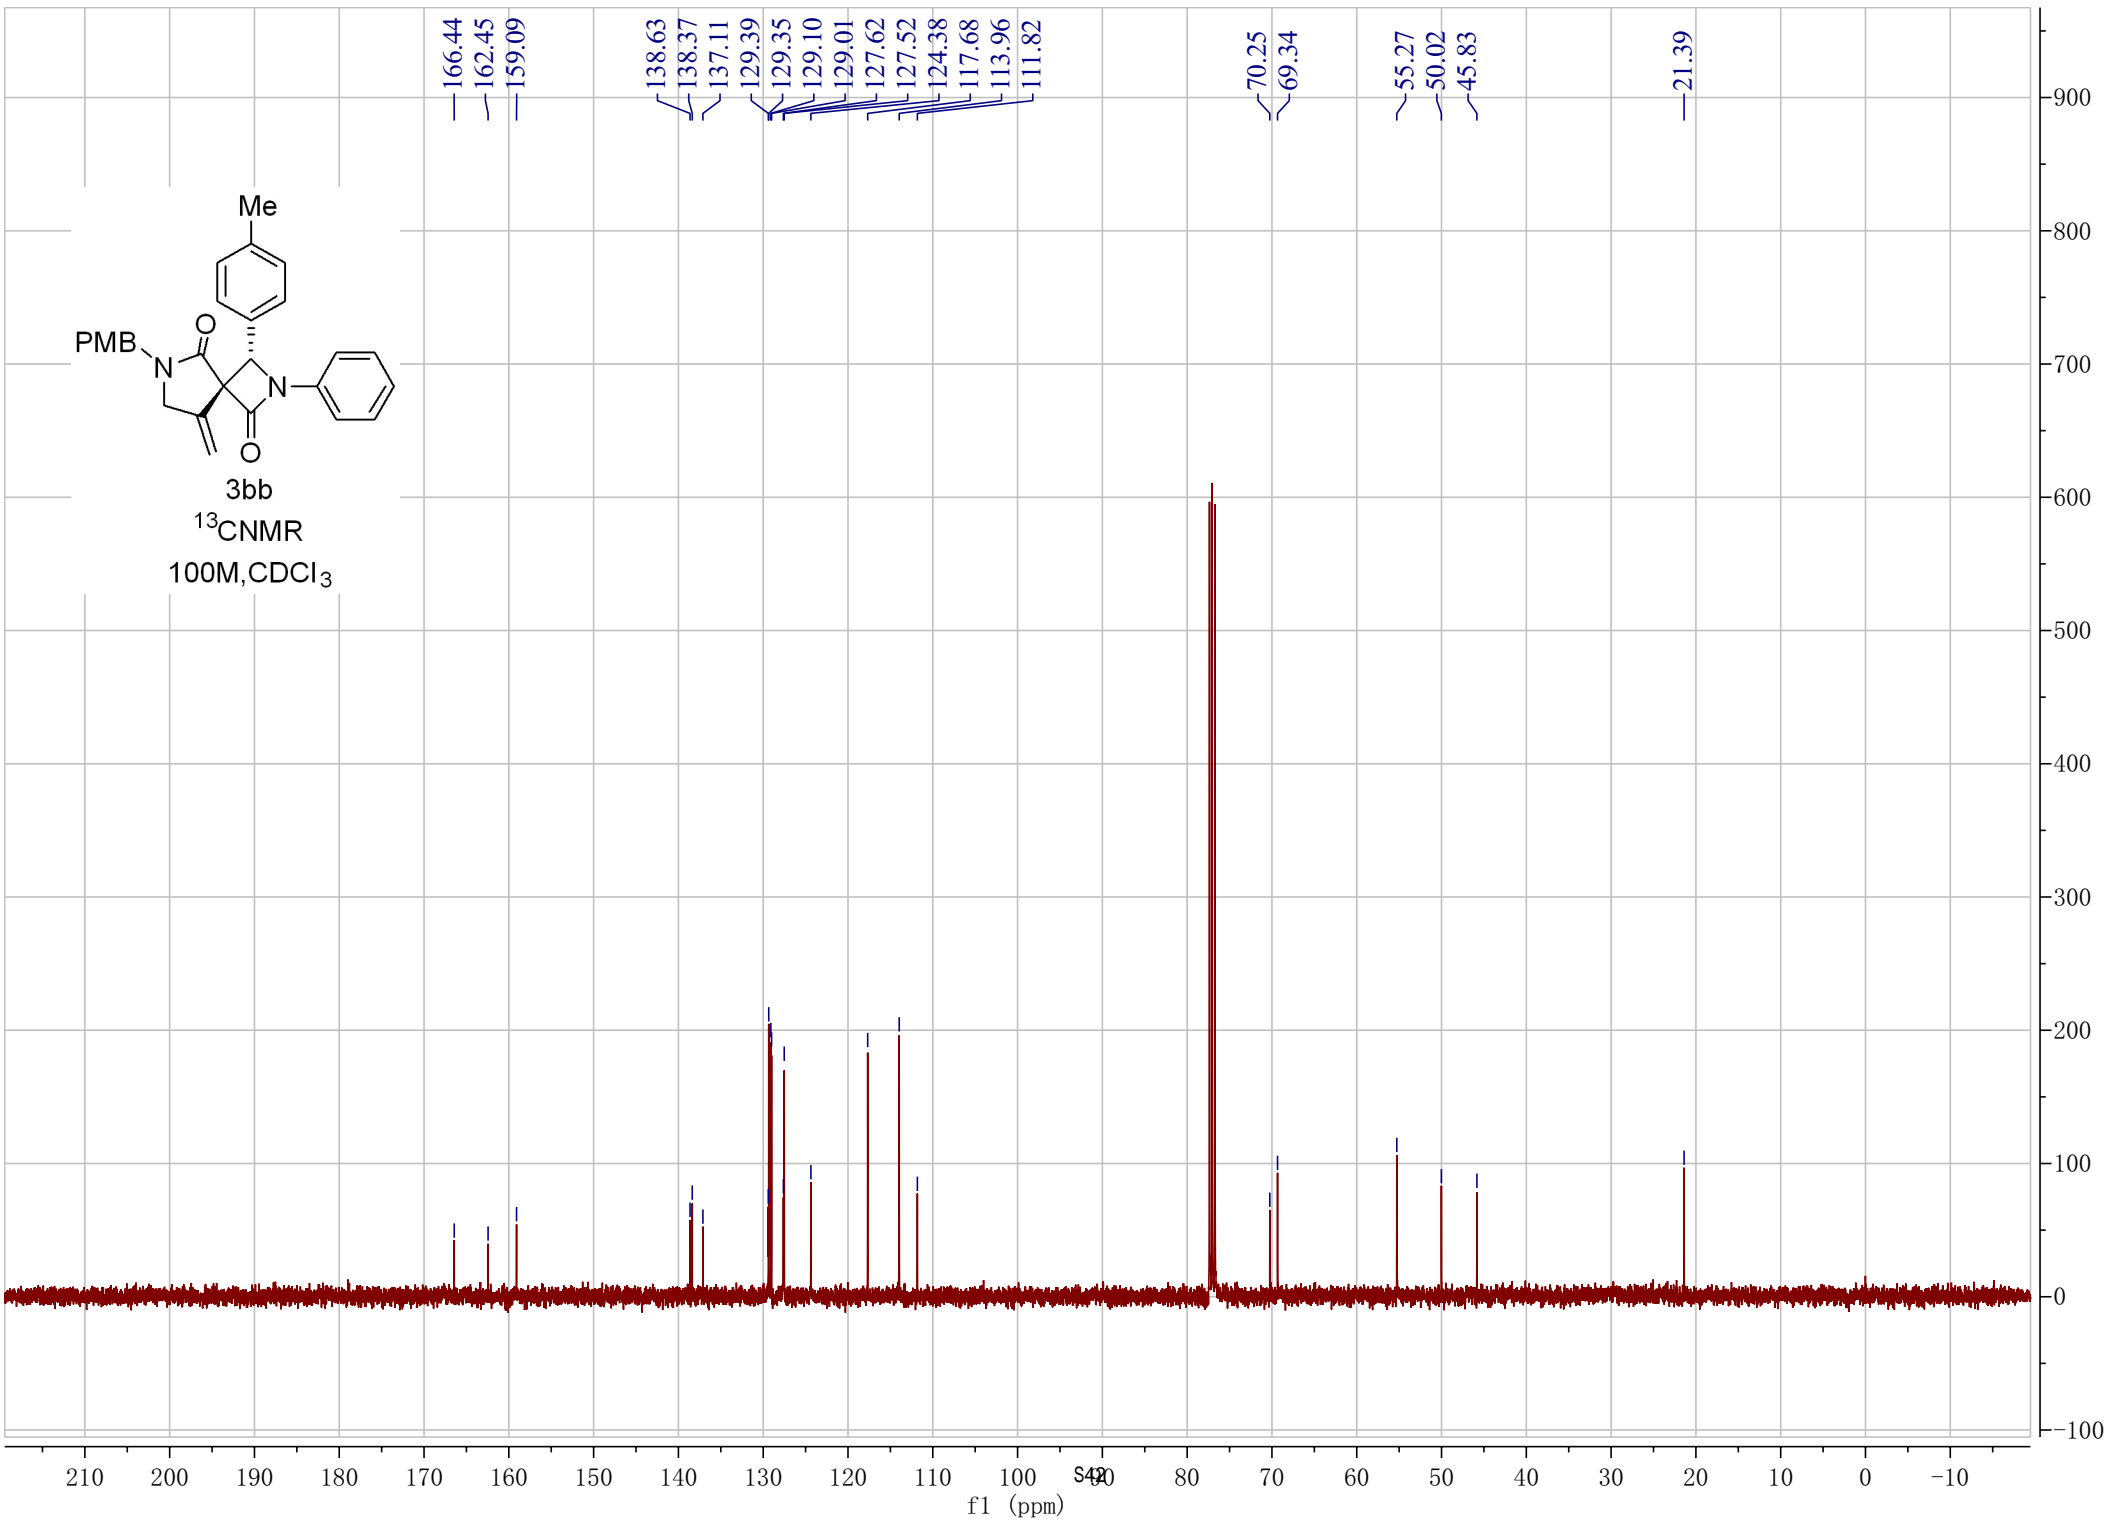

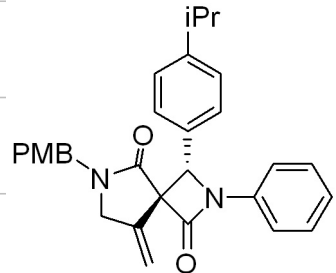

3bc

<sup>1</sup>H NMR  
400MHz CDCl<sub>3</sub>

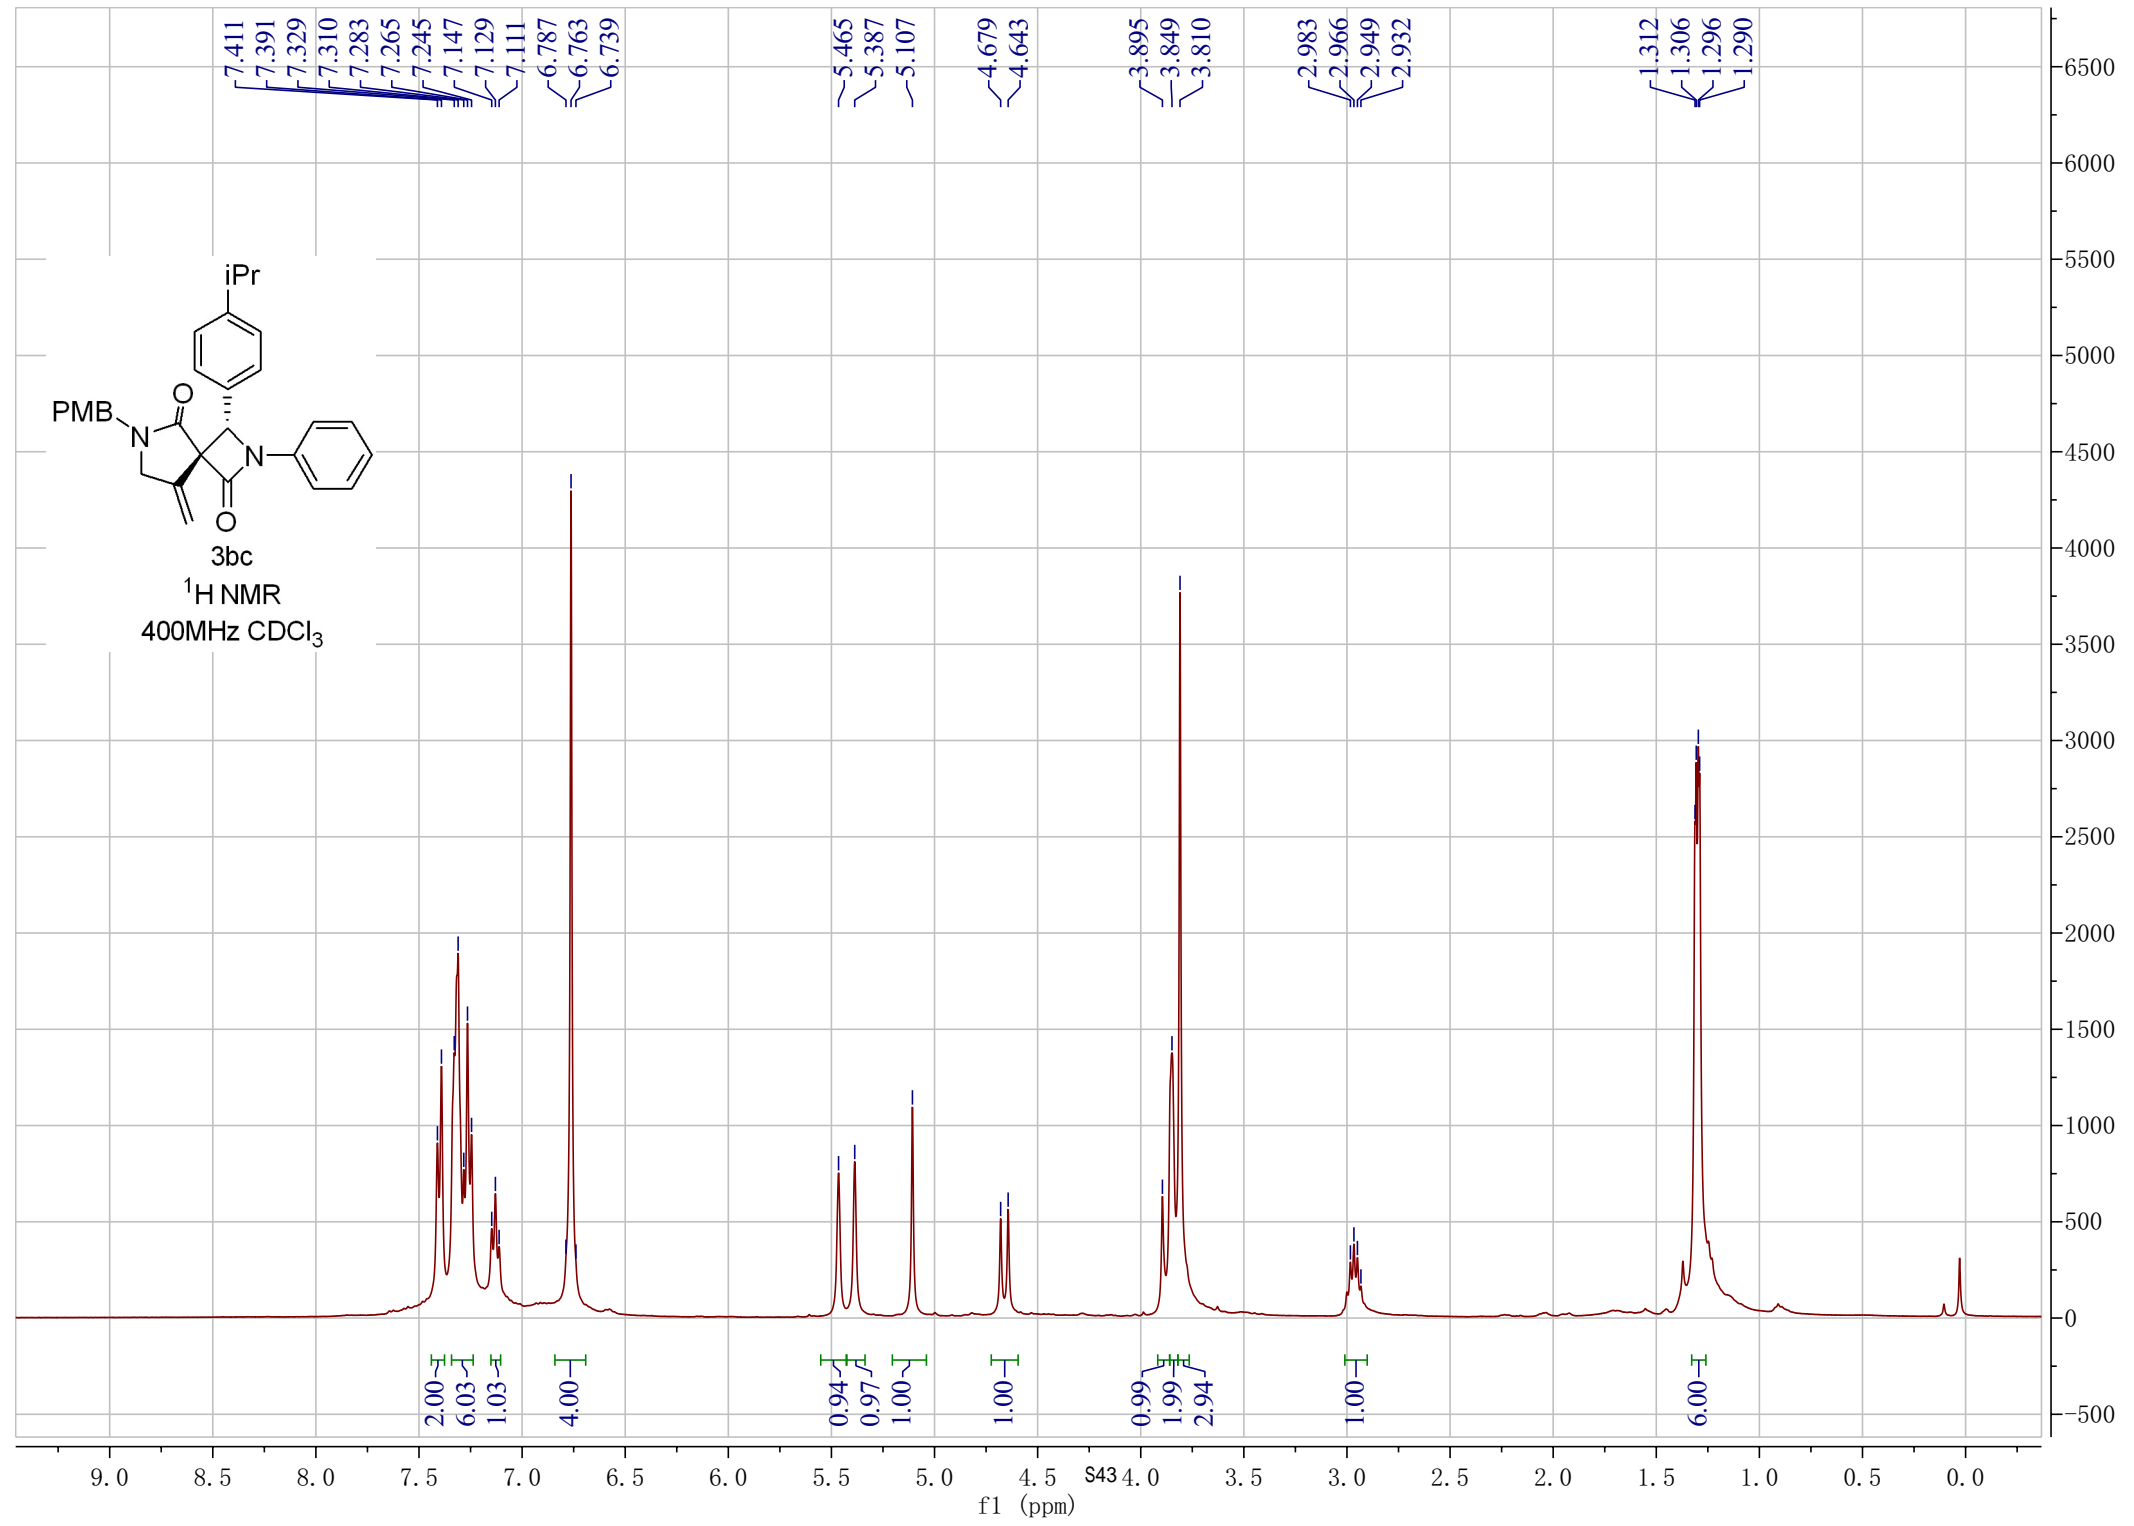

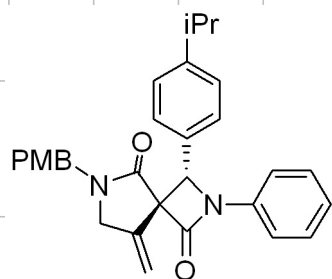

3bc

$^{13}\text{C}$ NMR  
100M,  $\text{CDCl}_3$

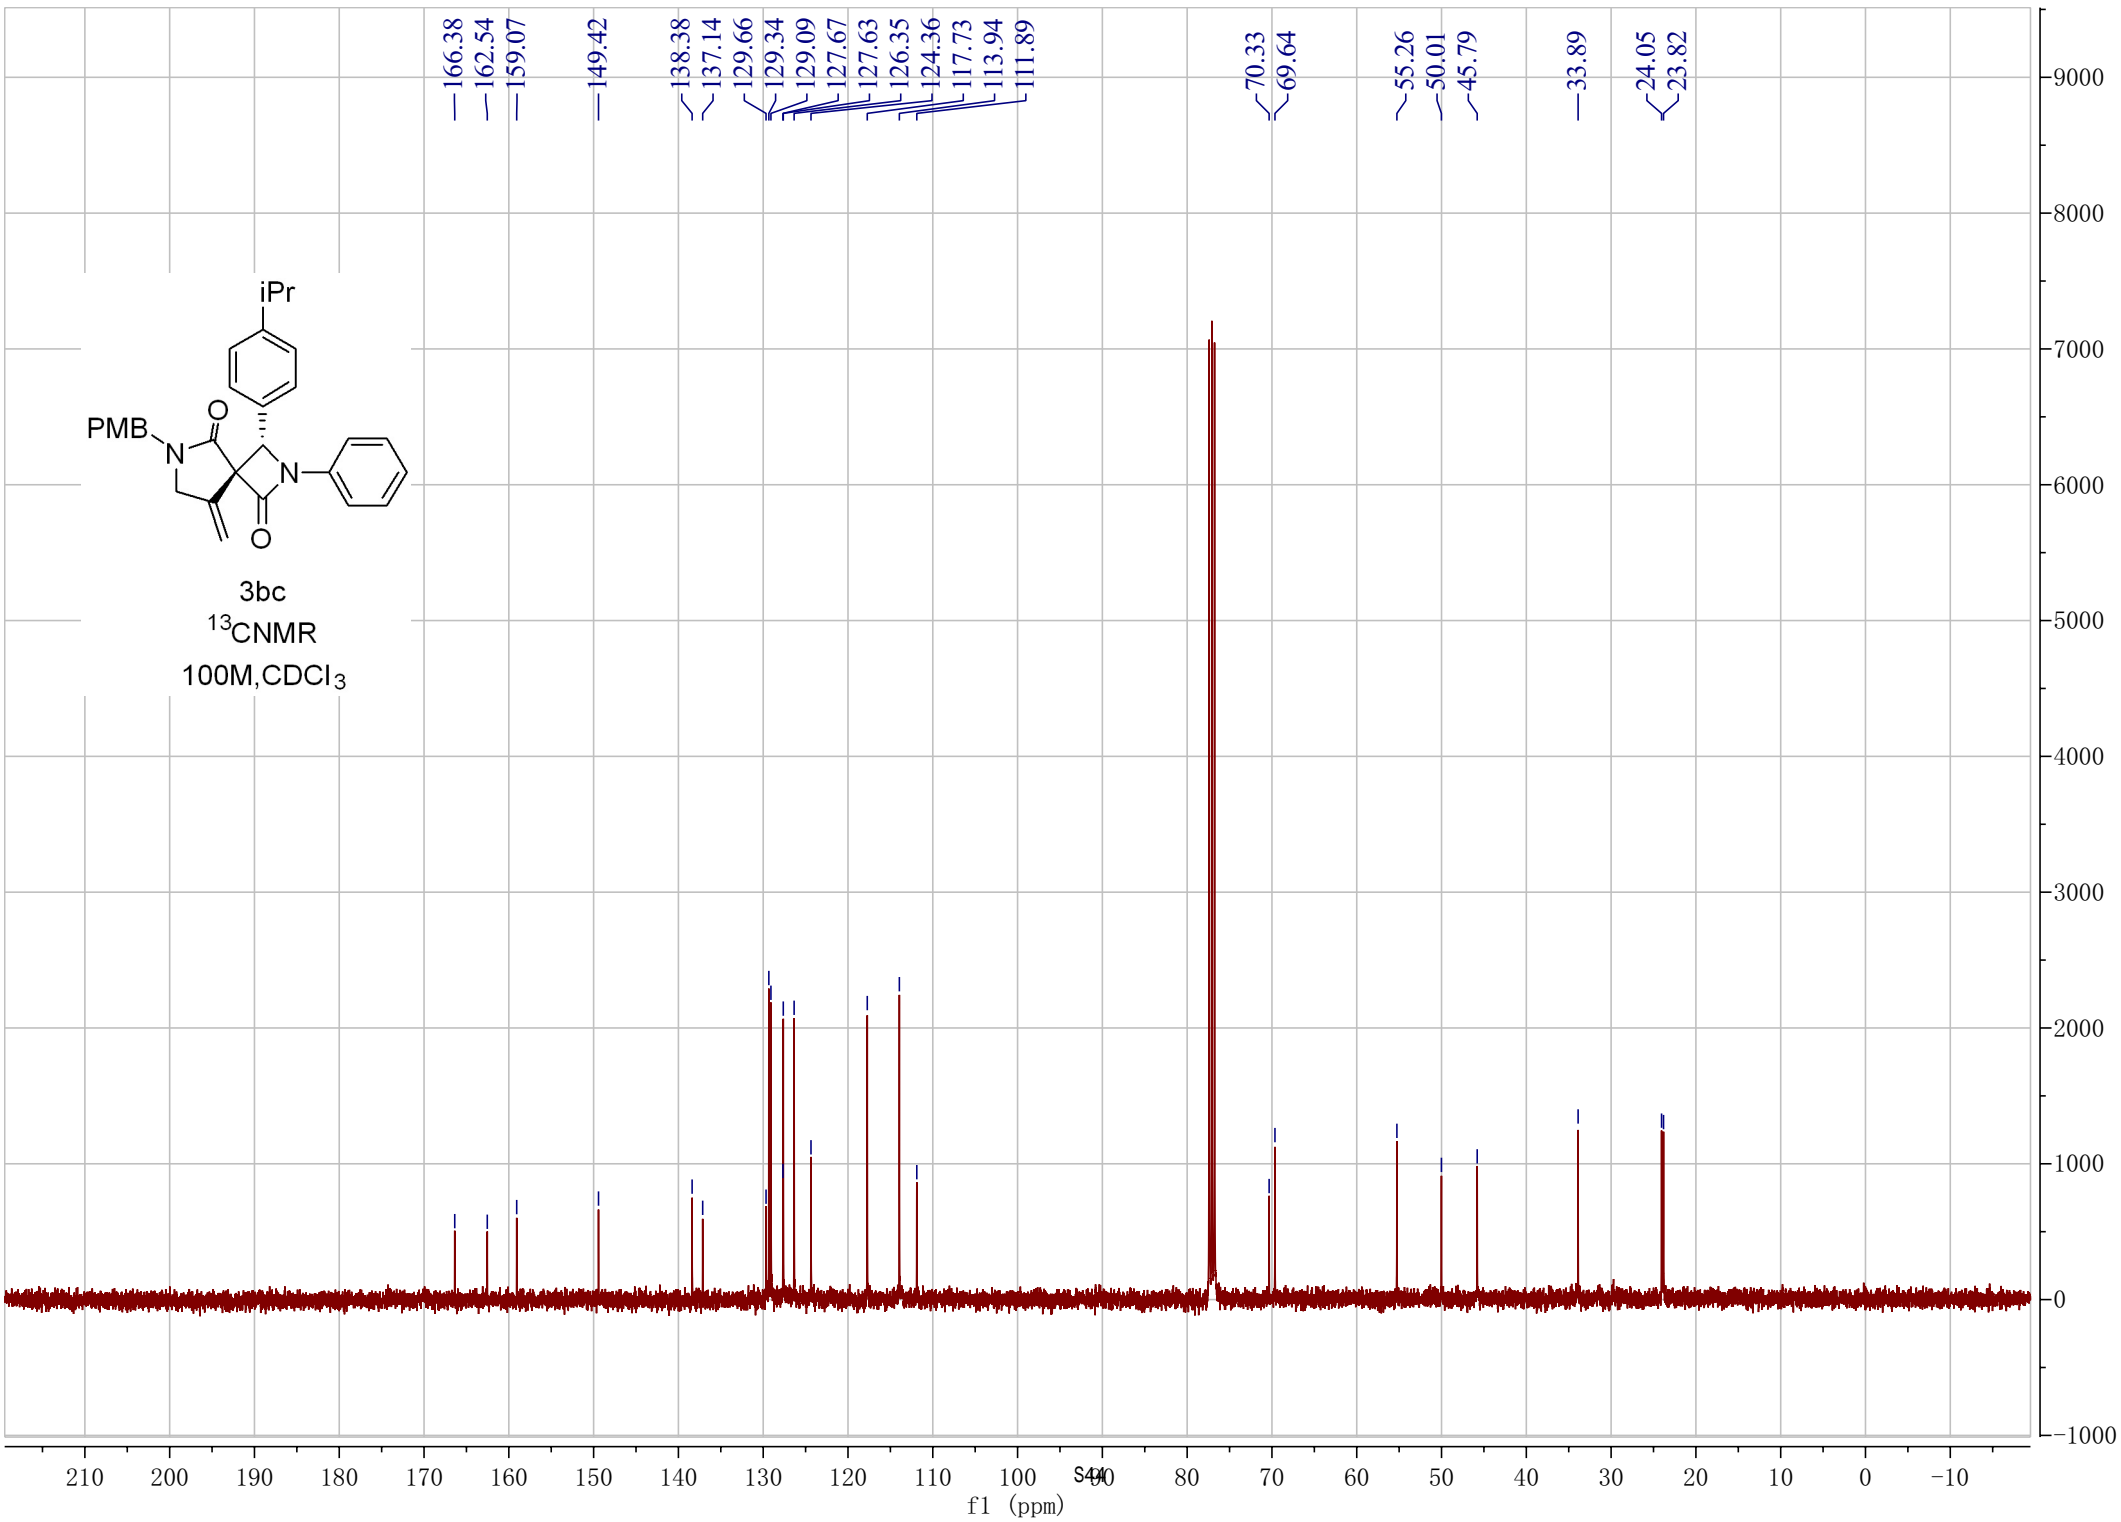

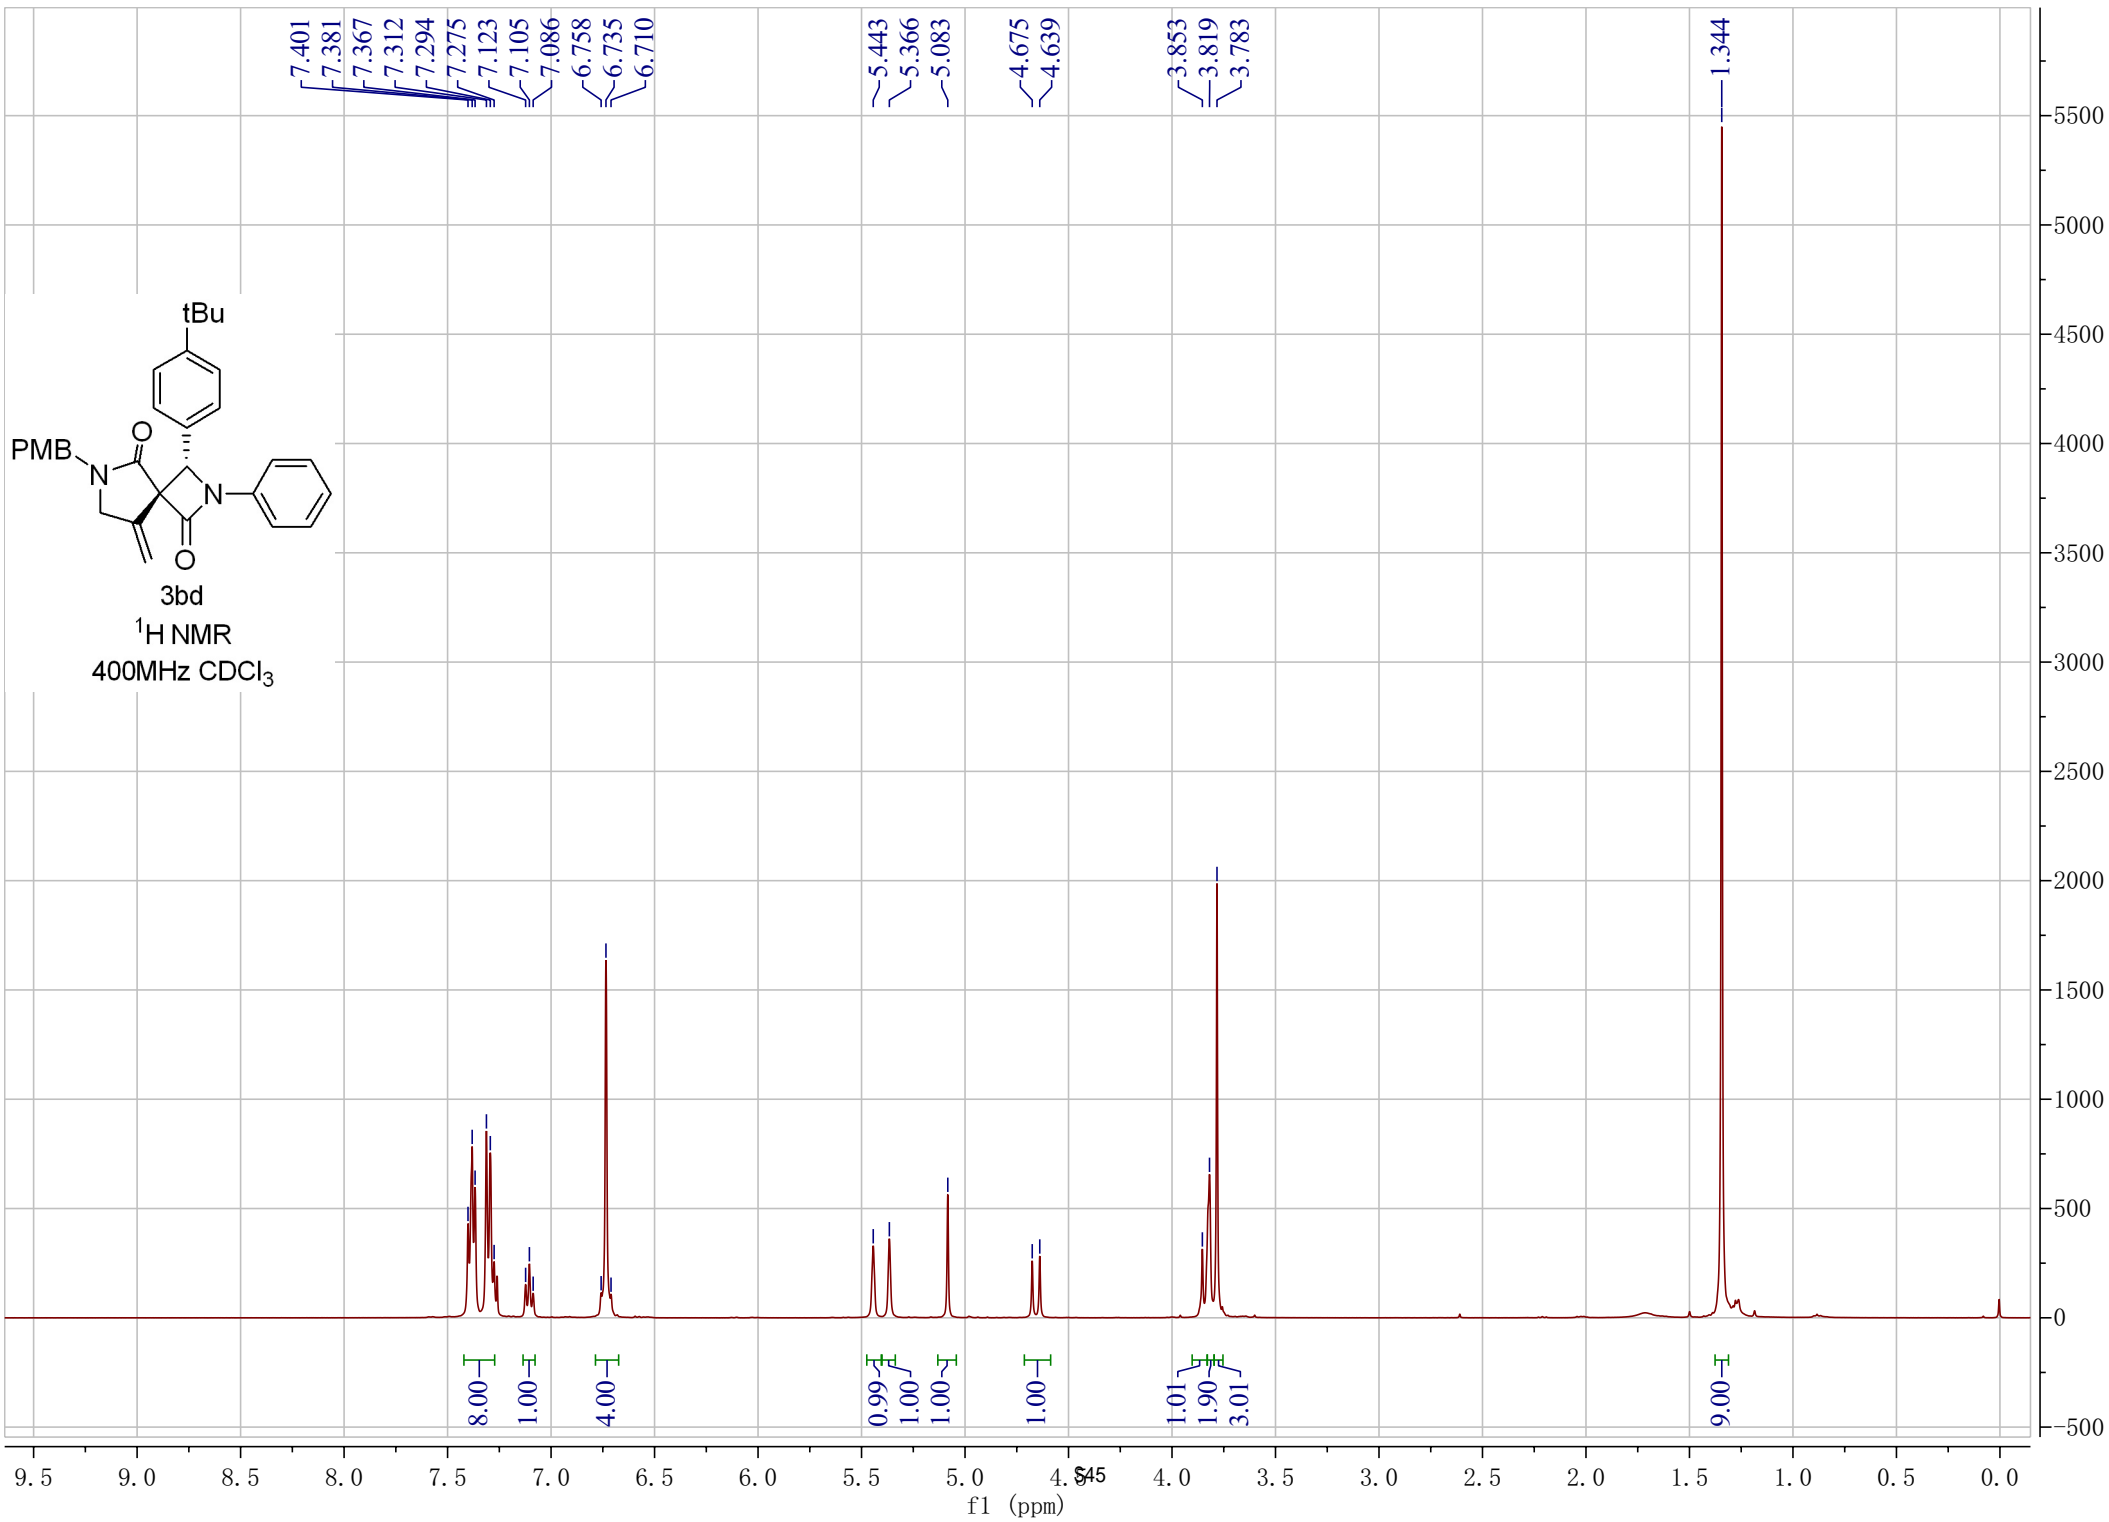

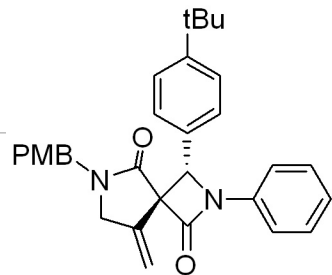

3bd  
<sup>13</sup>CNMR  
100M, CDCl<sub>3</sub>

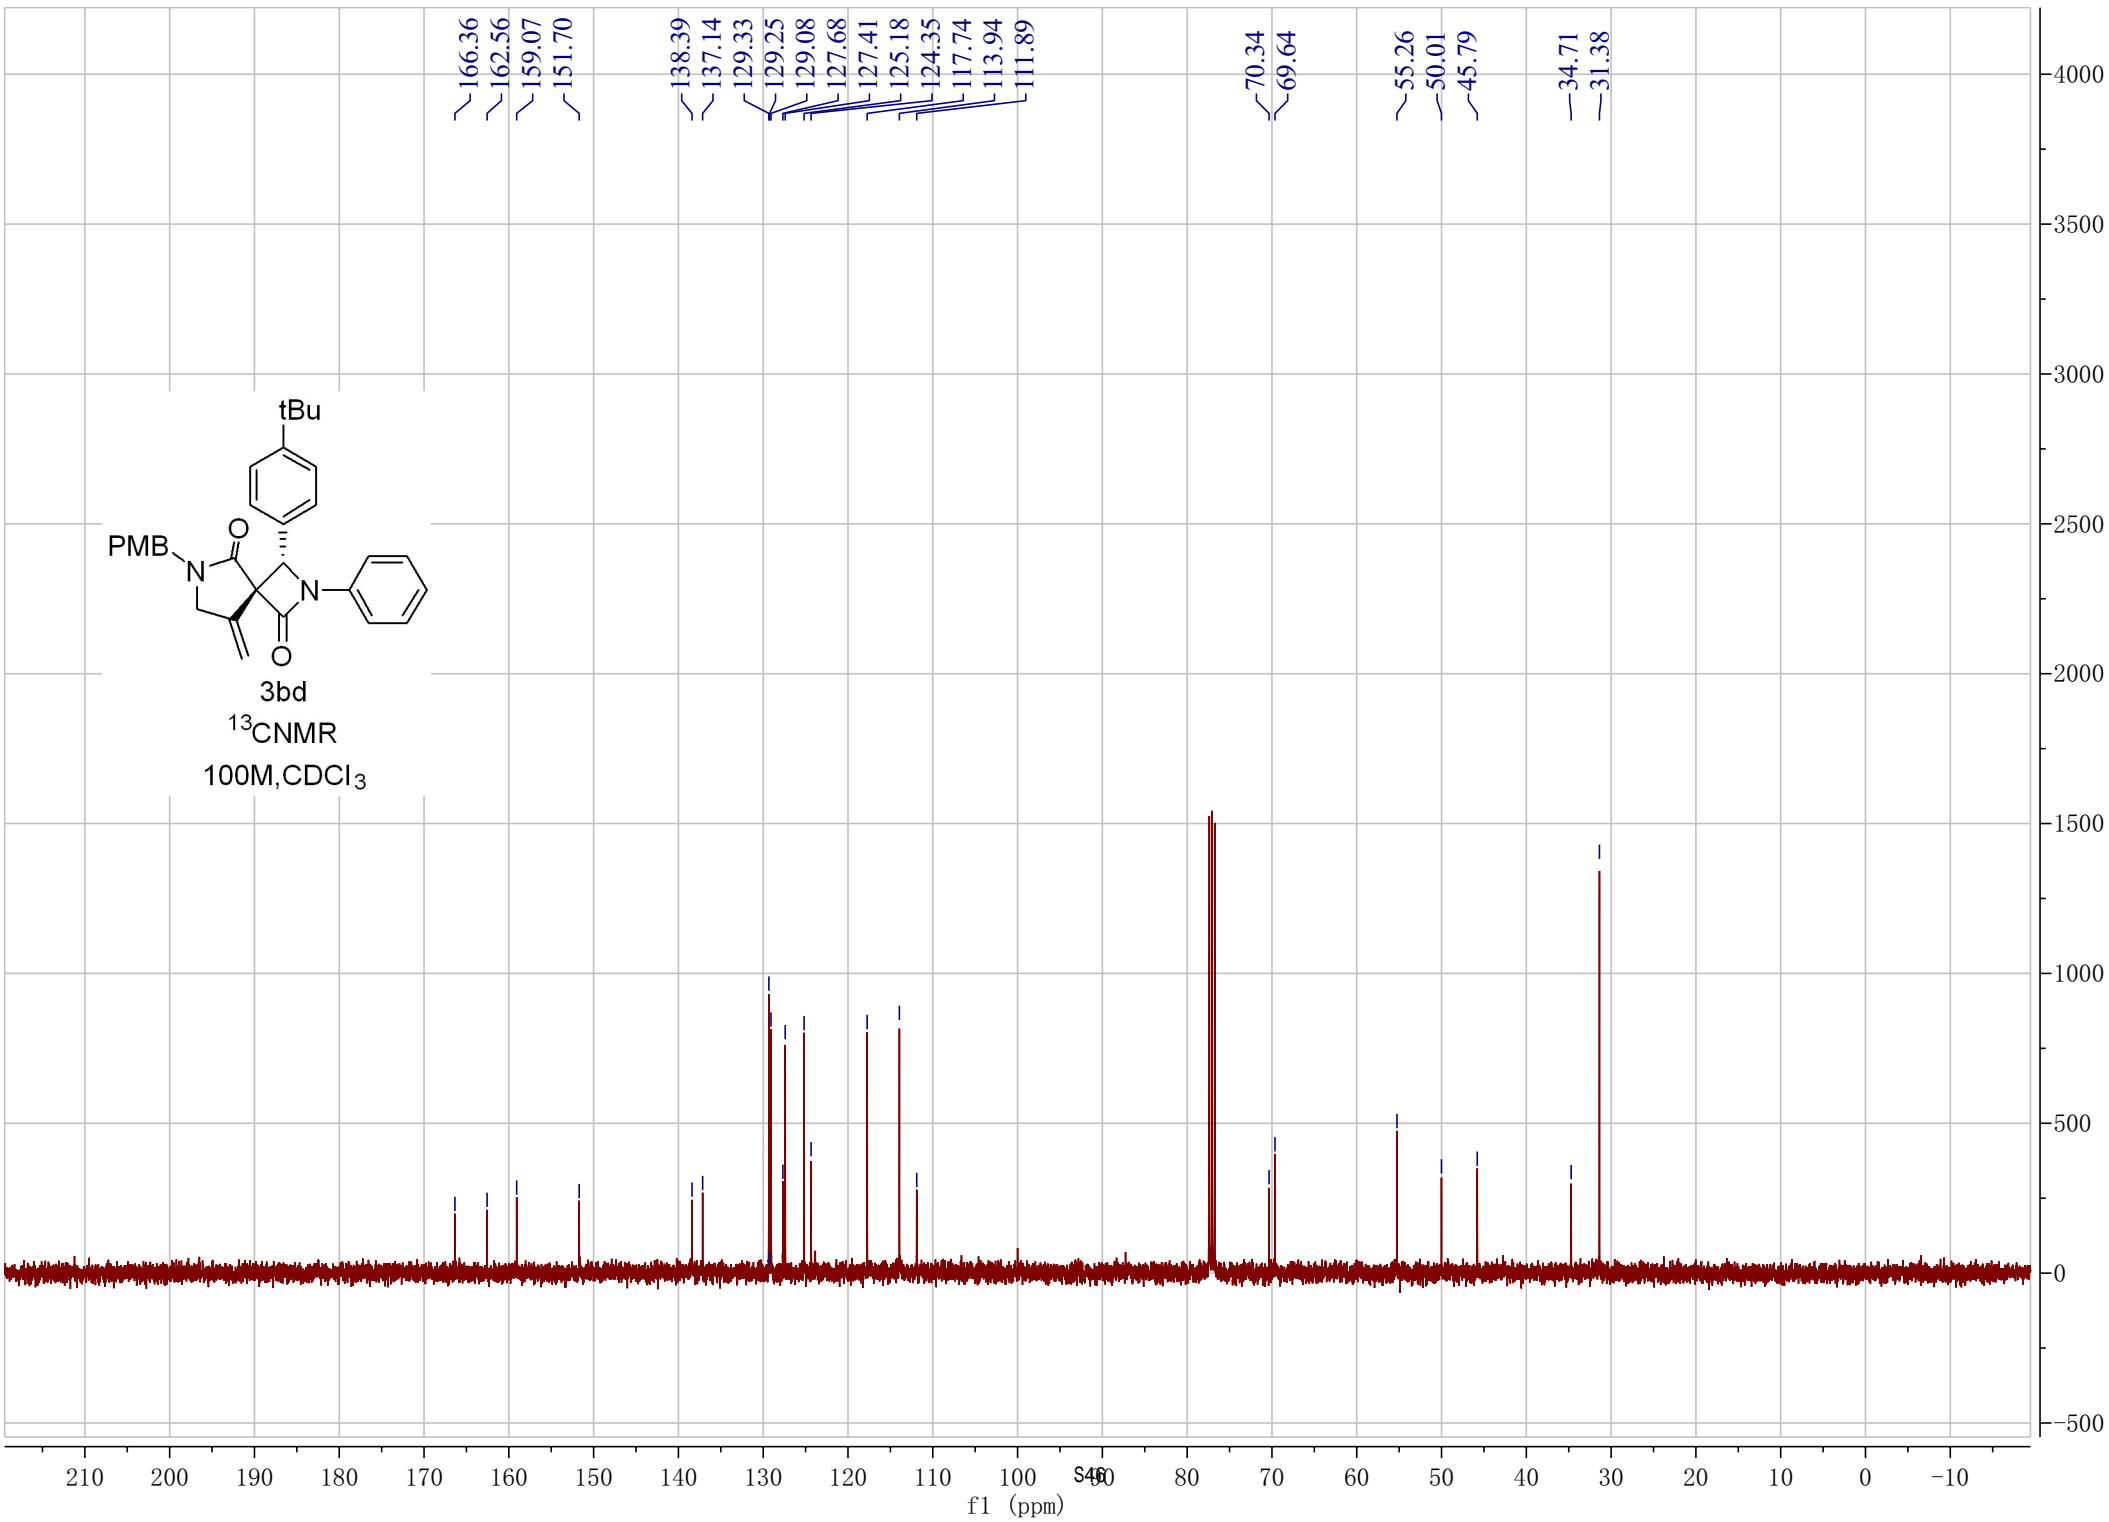

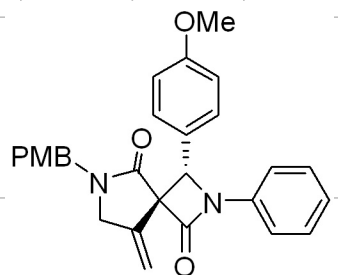

3be

<sup>1</sup>H NMR  
400MHz CDCl<sub>3</sub>

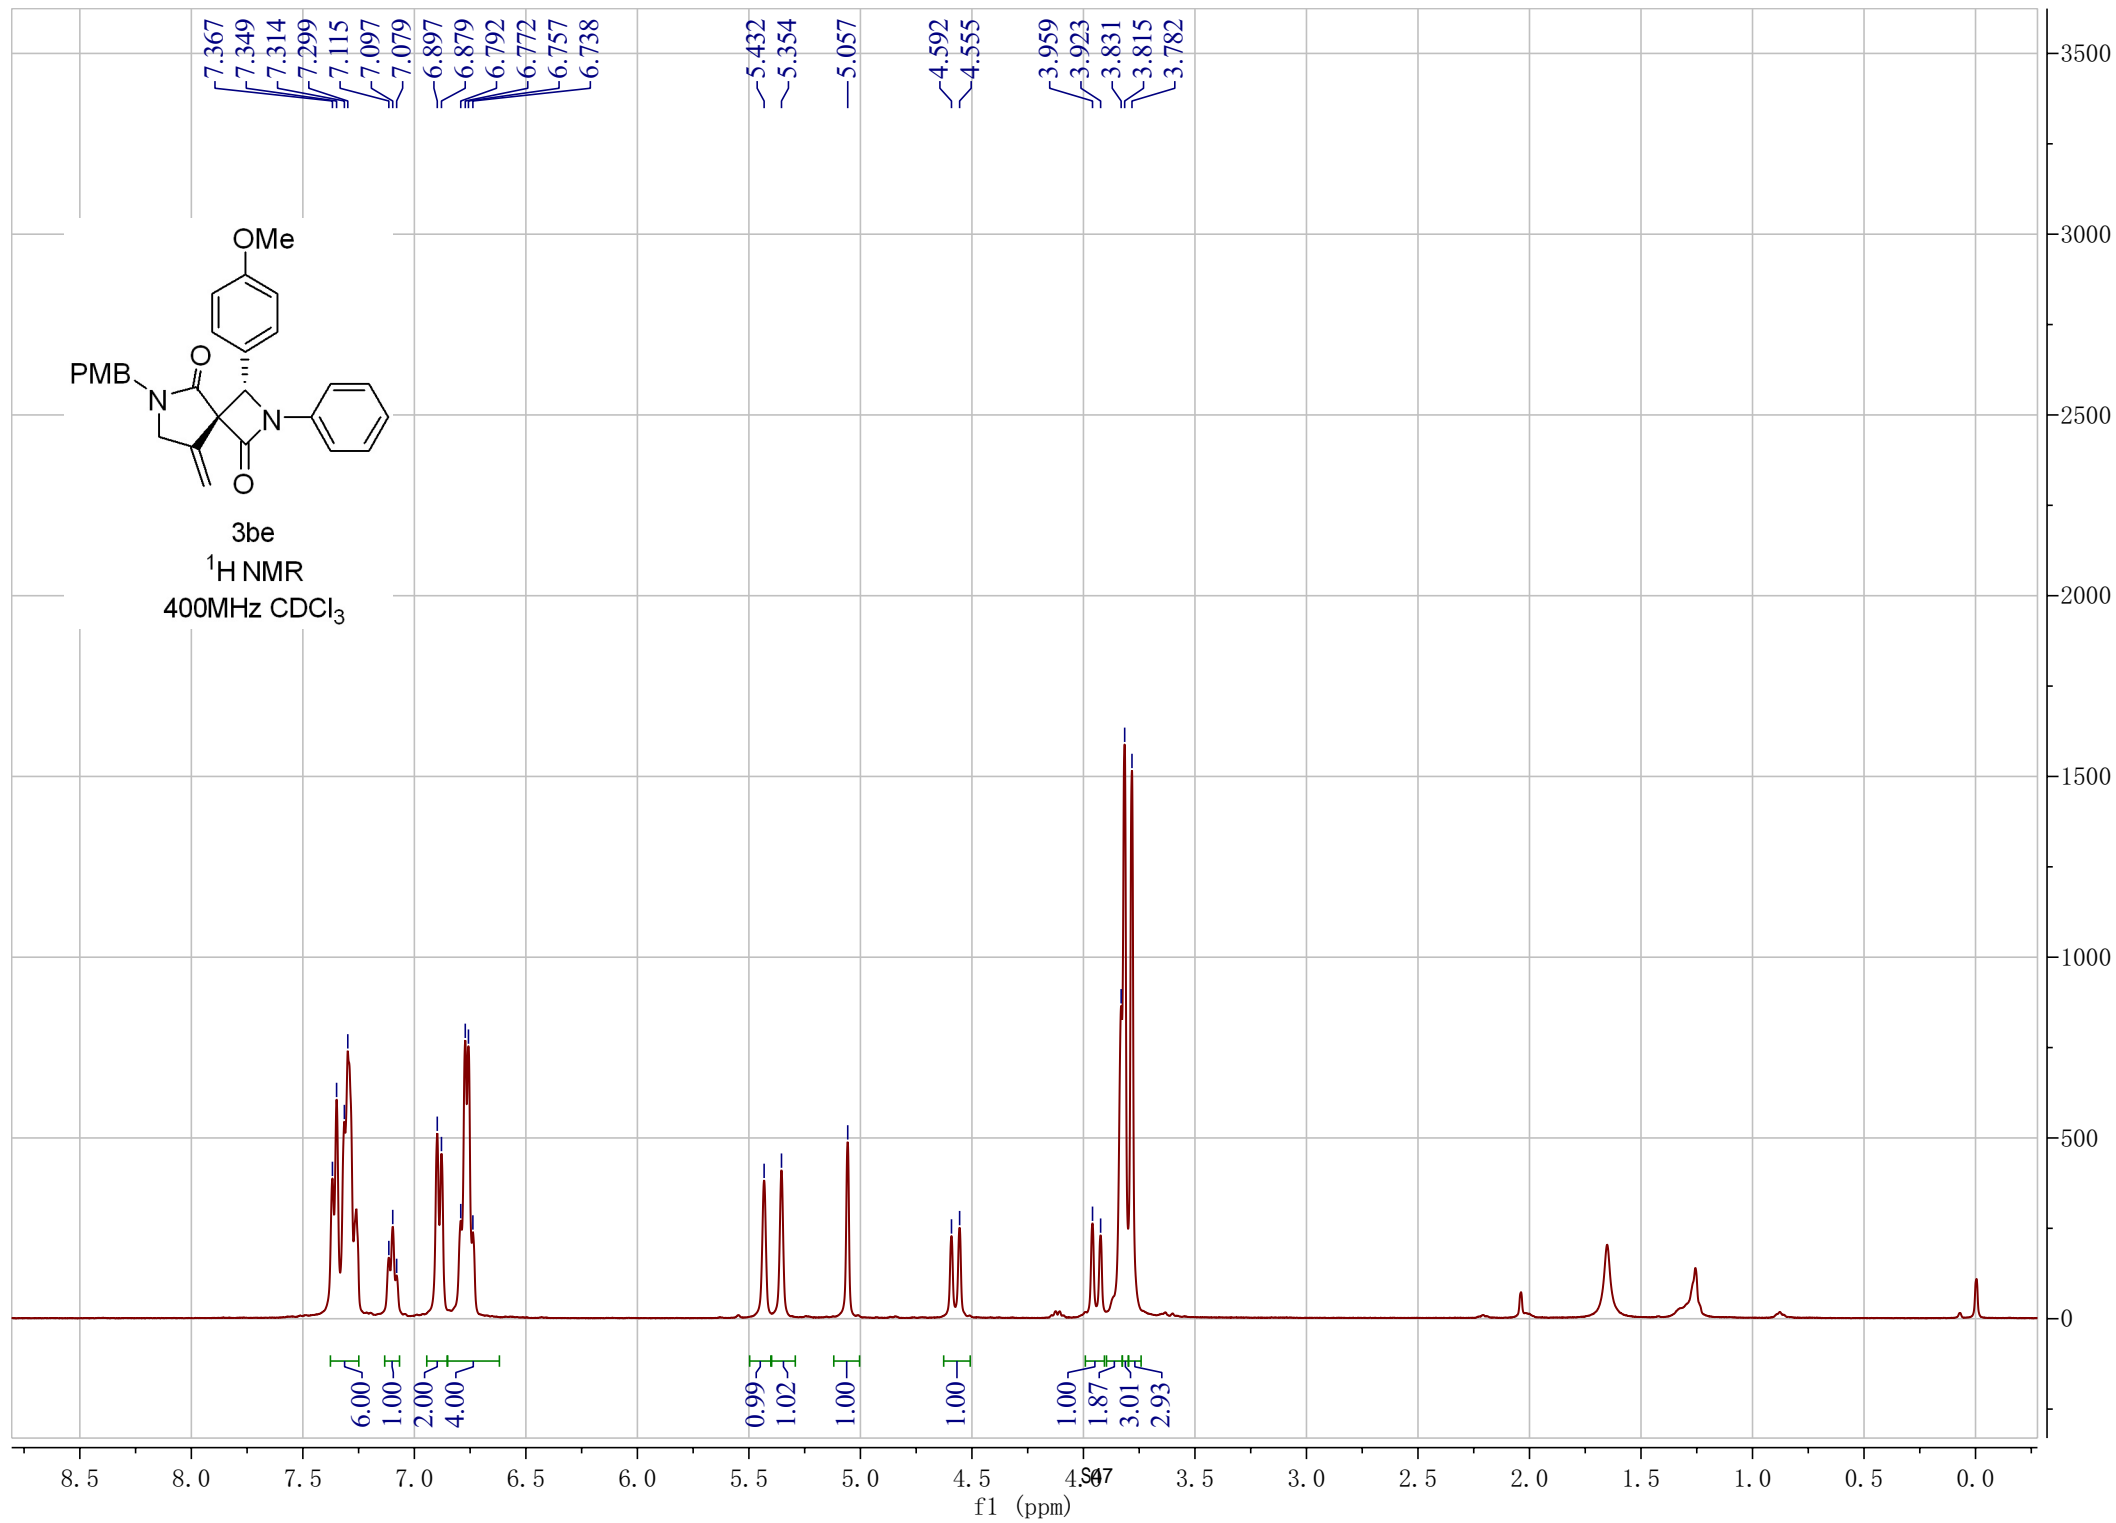

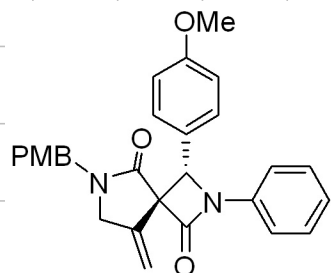

3be  
 $^{13}\text{C}$ NMR  
100M,  $\text{CDCl}_3$

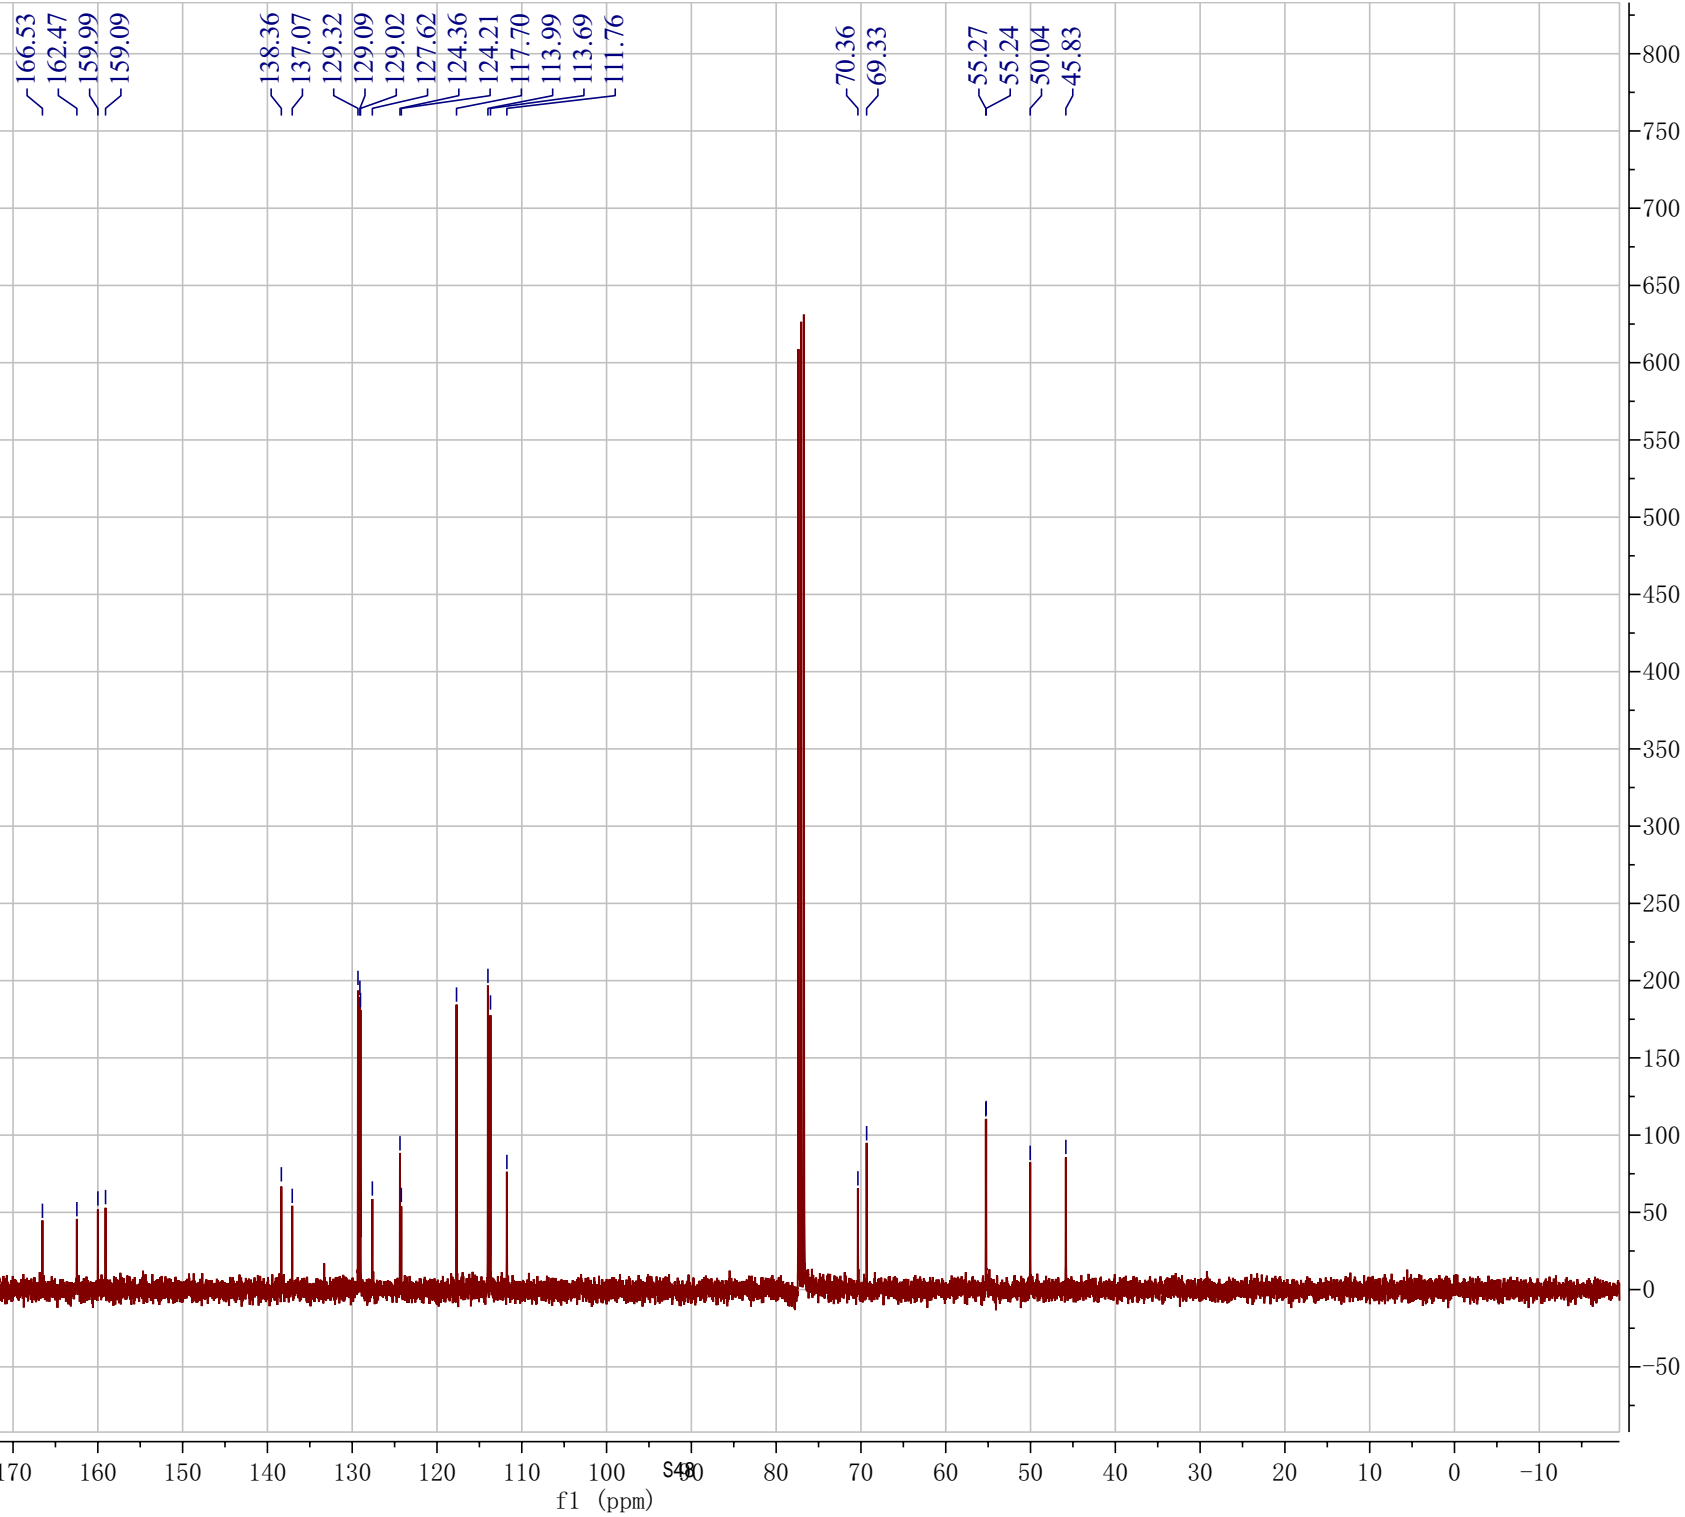



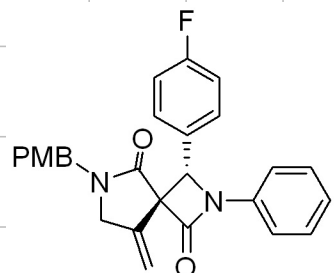

3bf  
<sup>1</sup>H NMR  
400M, CDCl<sub>3</sub>

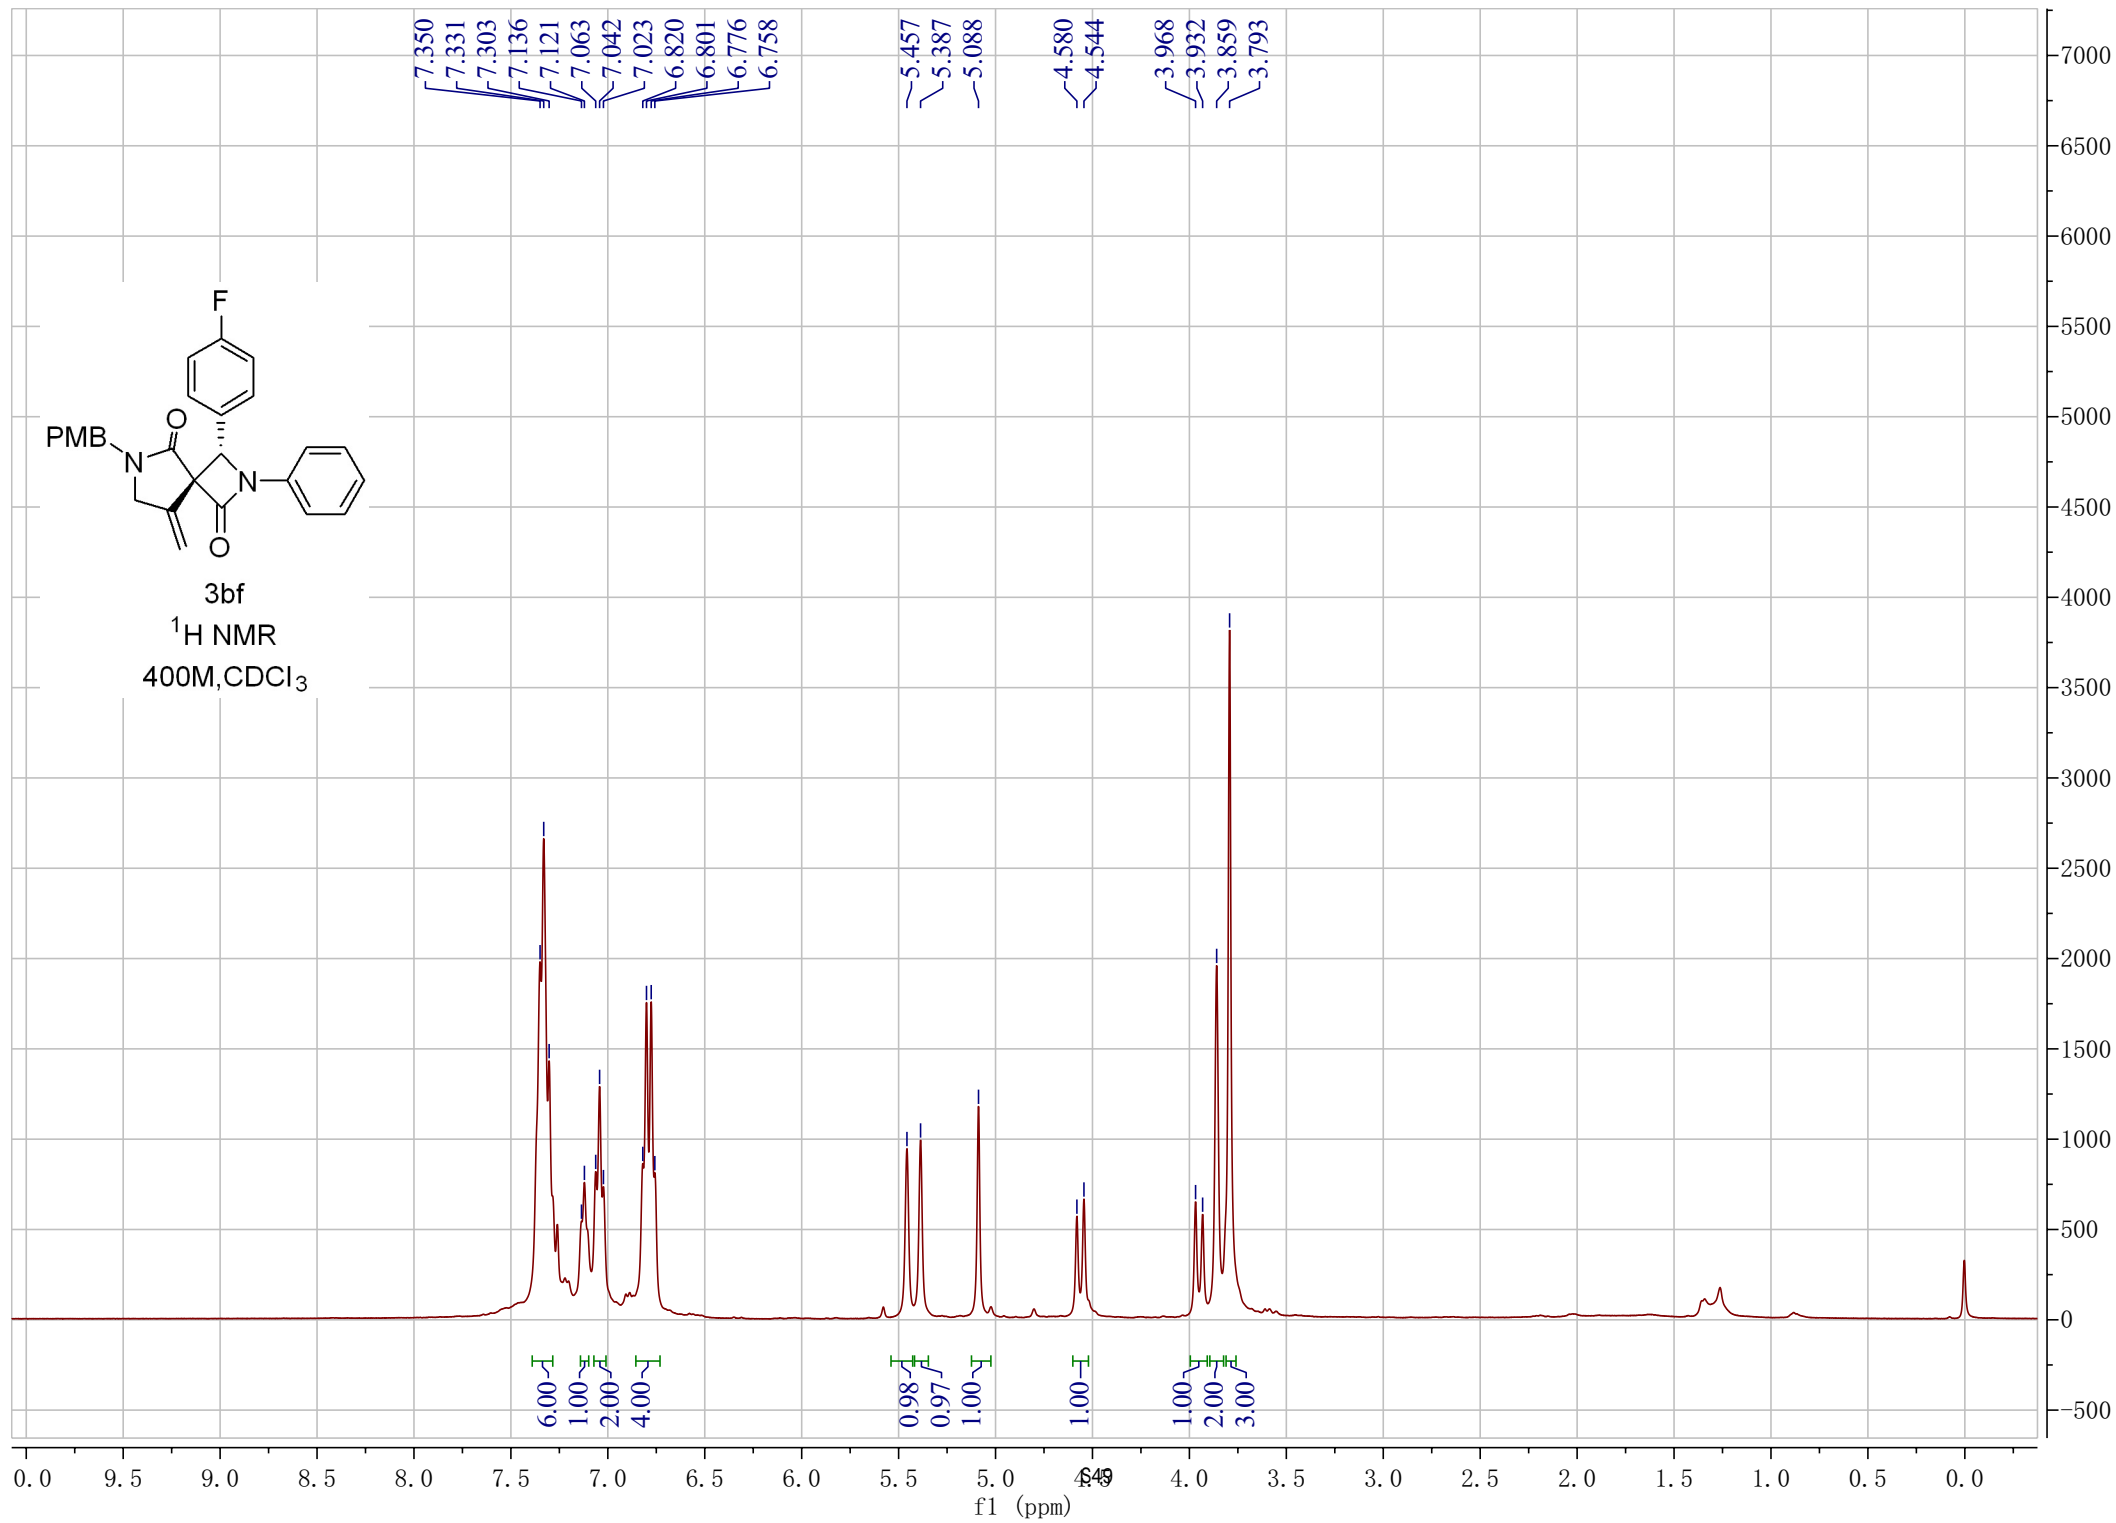

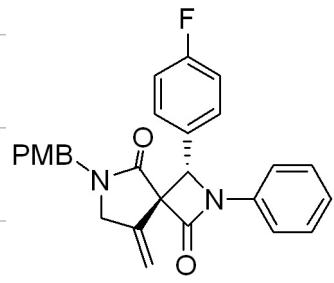

3bf

$^{13}\text{C}$ NMR

100M,  $\text{CDCl}_3$

166.27  
164.21  
162.24  
161.75  
159.18  
138.04  
136.85  
129.51  
129.43  
129.38  
129.20  
128.22  
128.19  
127.56  
124.57  
117.61  
115.46  
115.24  
114.04  
112.13

70.18  
68.58

55.29  
50.05  
45.90

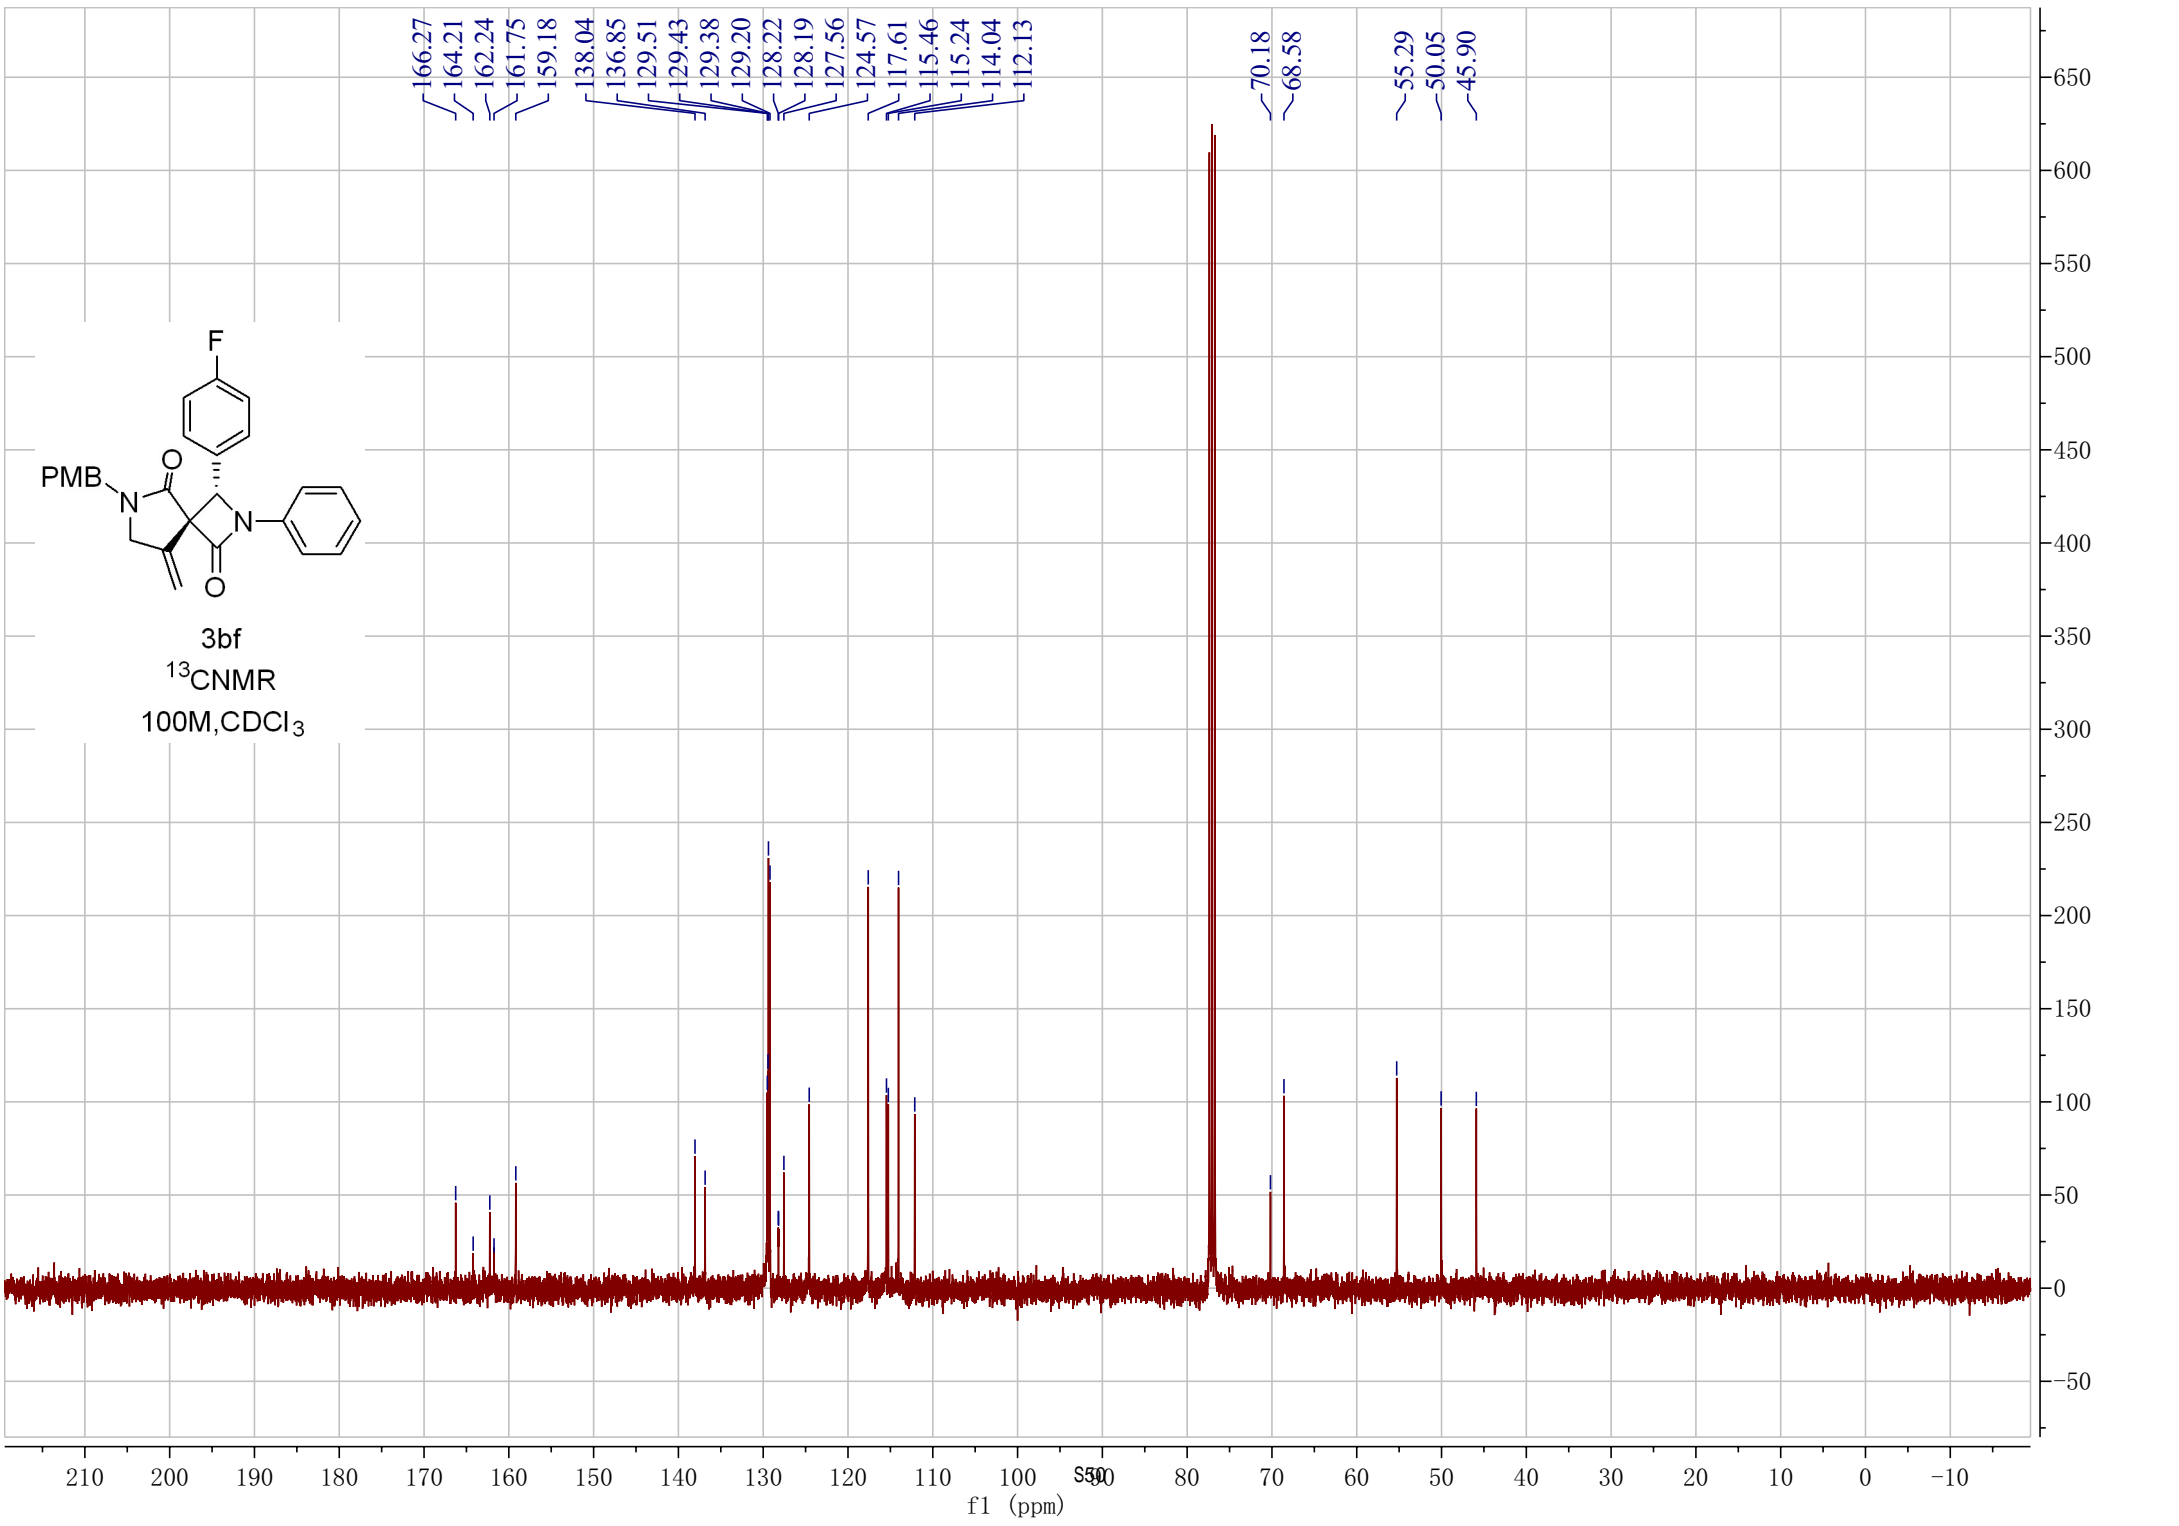

f1 (ppm)

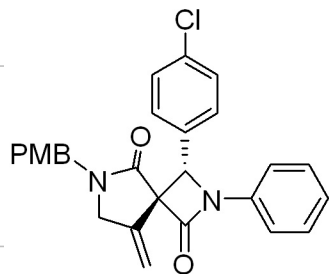

3bg  
<sup>1</sup>H NMR  
400M, CDCl<sub>3</sub>

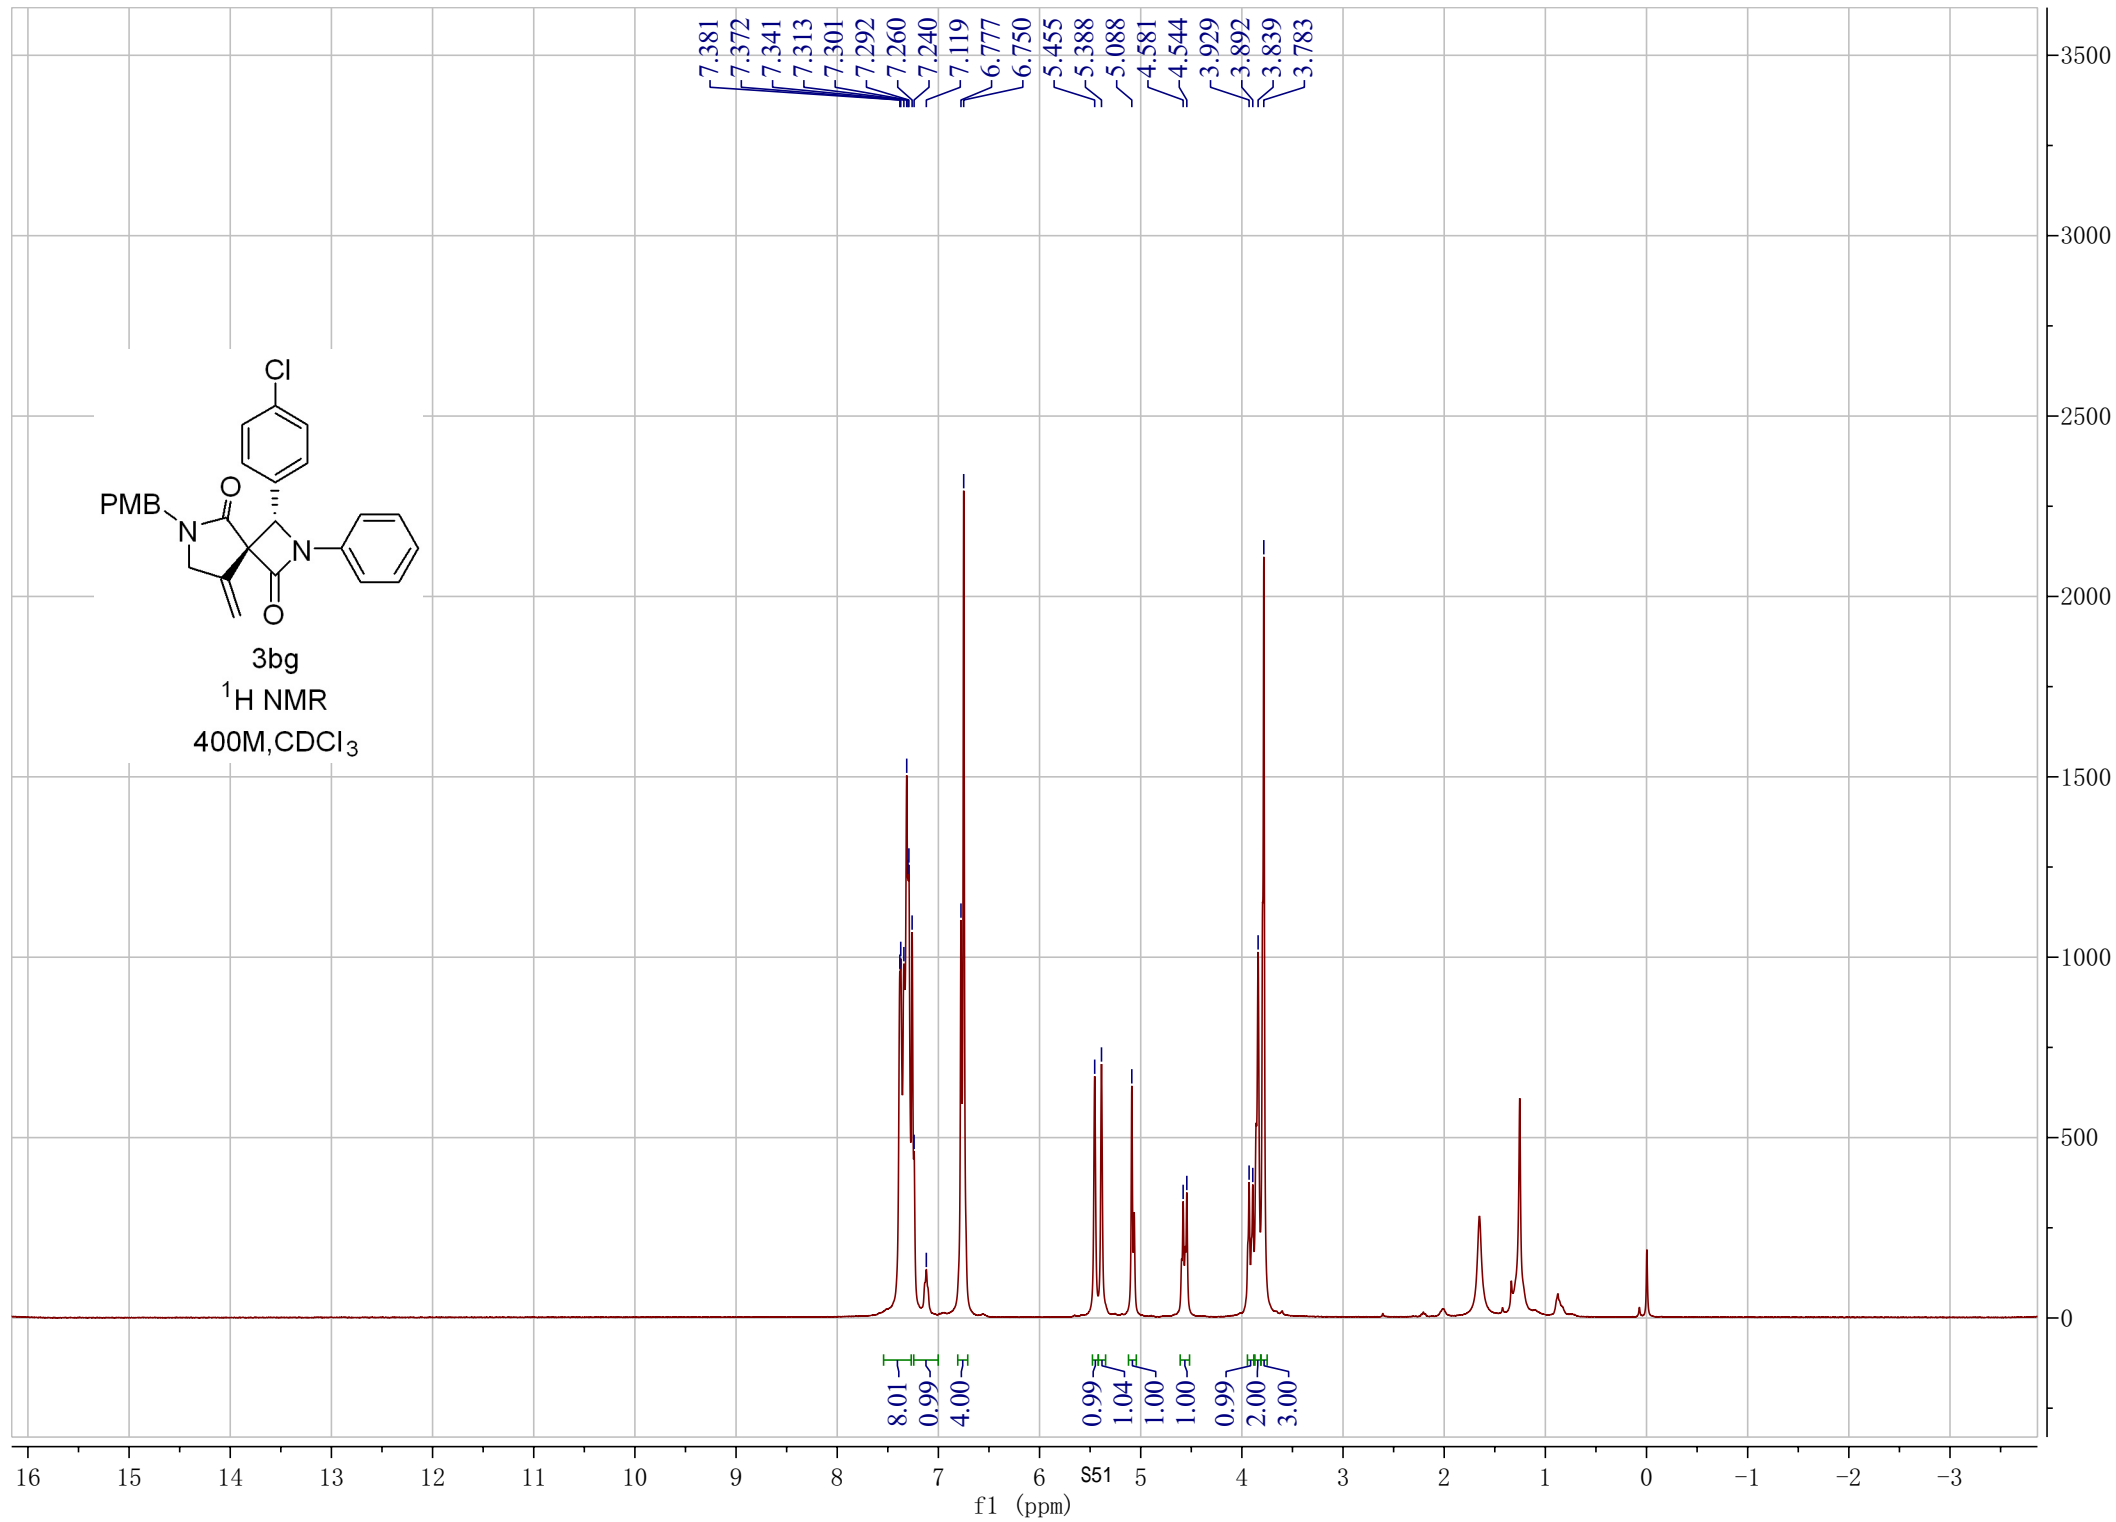

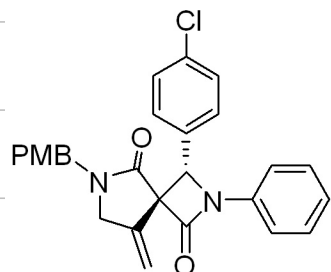

3bg

$^{13}\text{C}$ NMR

100M,  $\text{CDCl}_3$

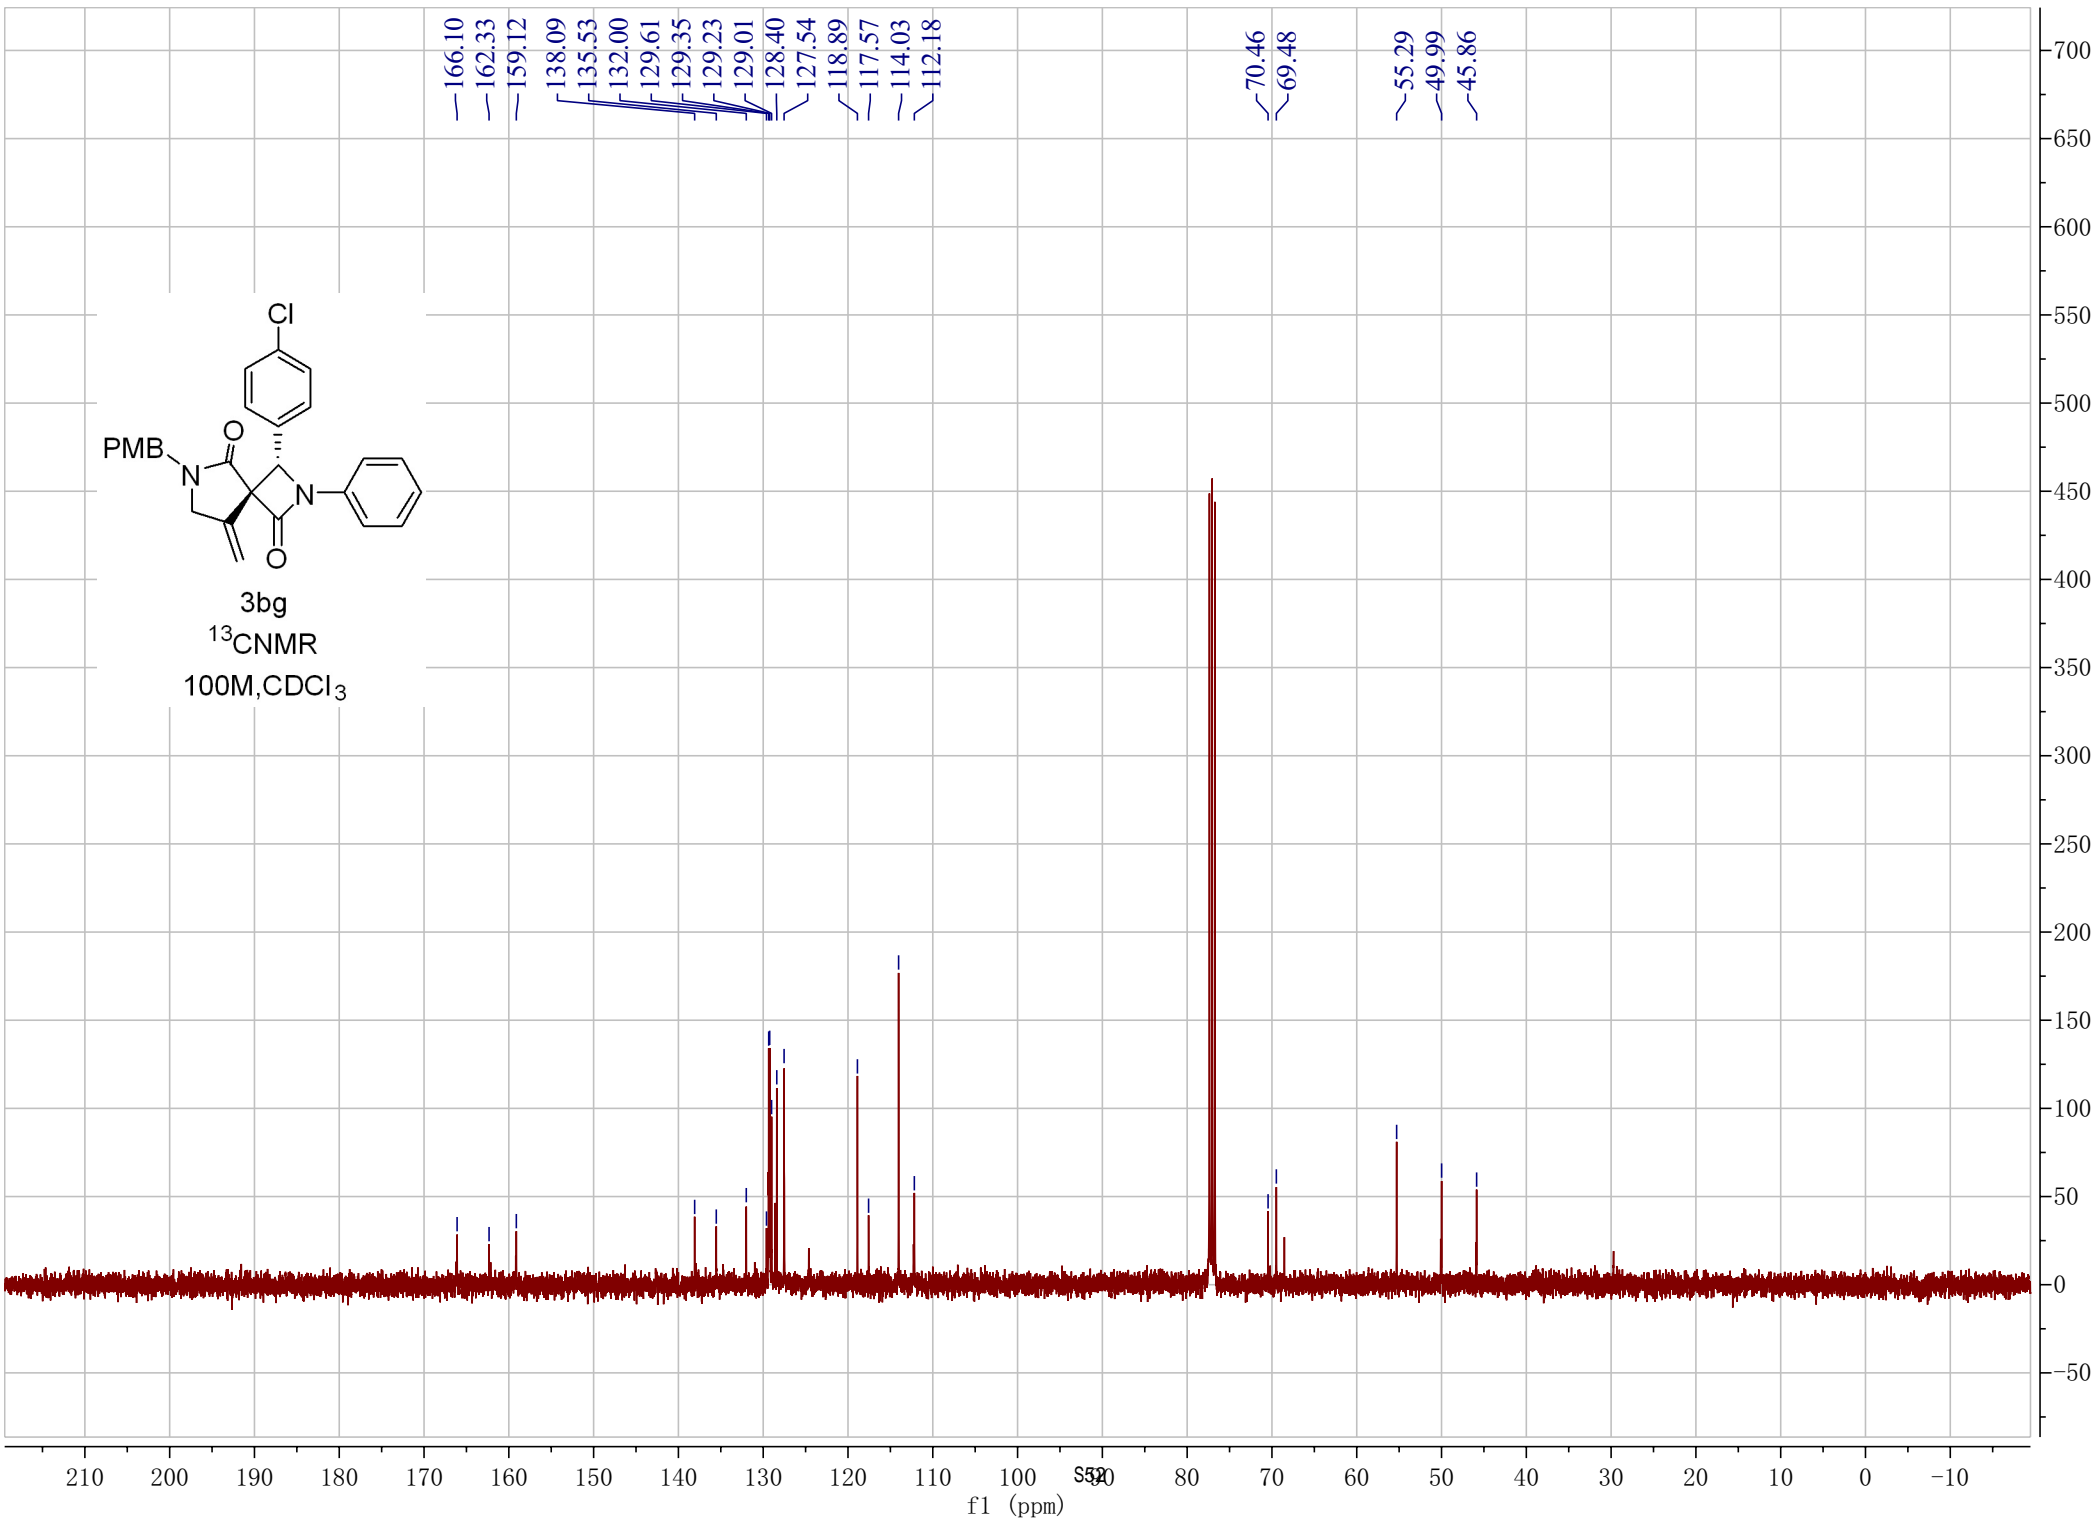

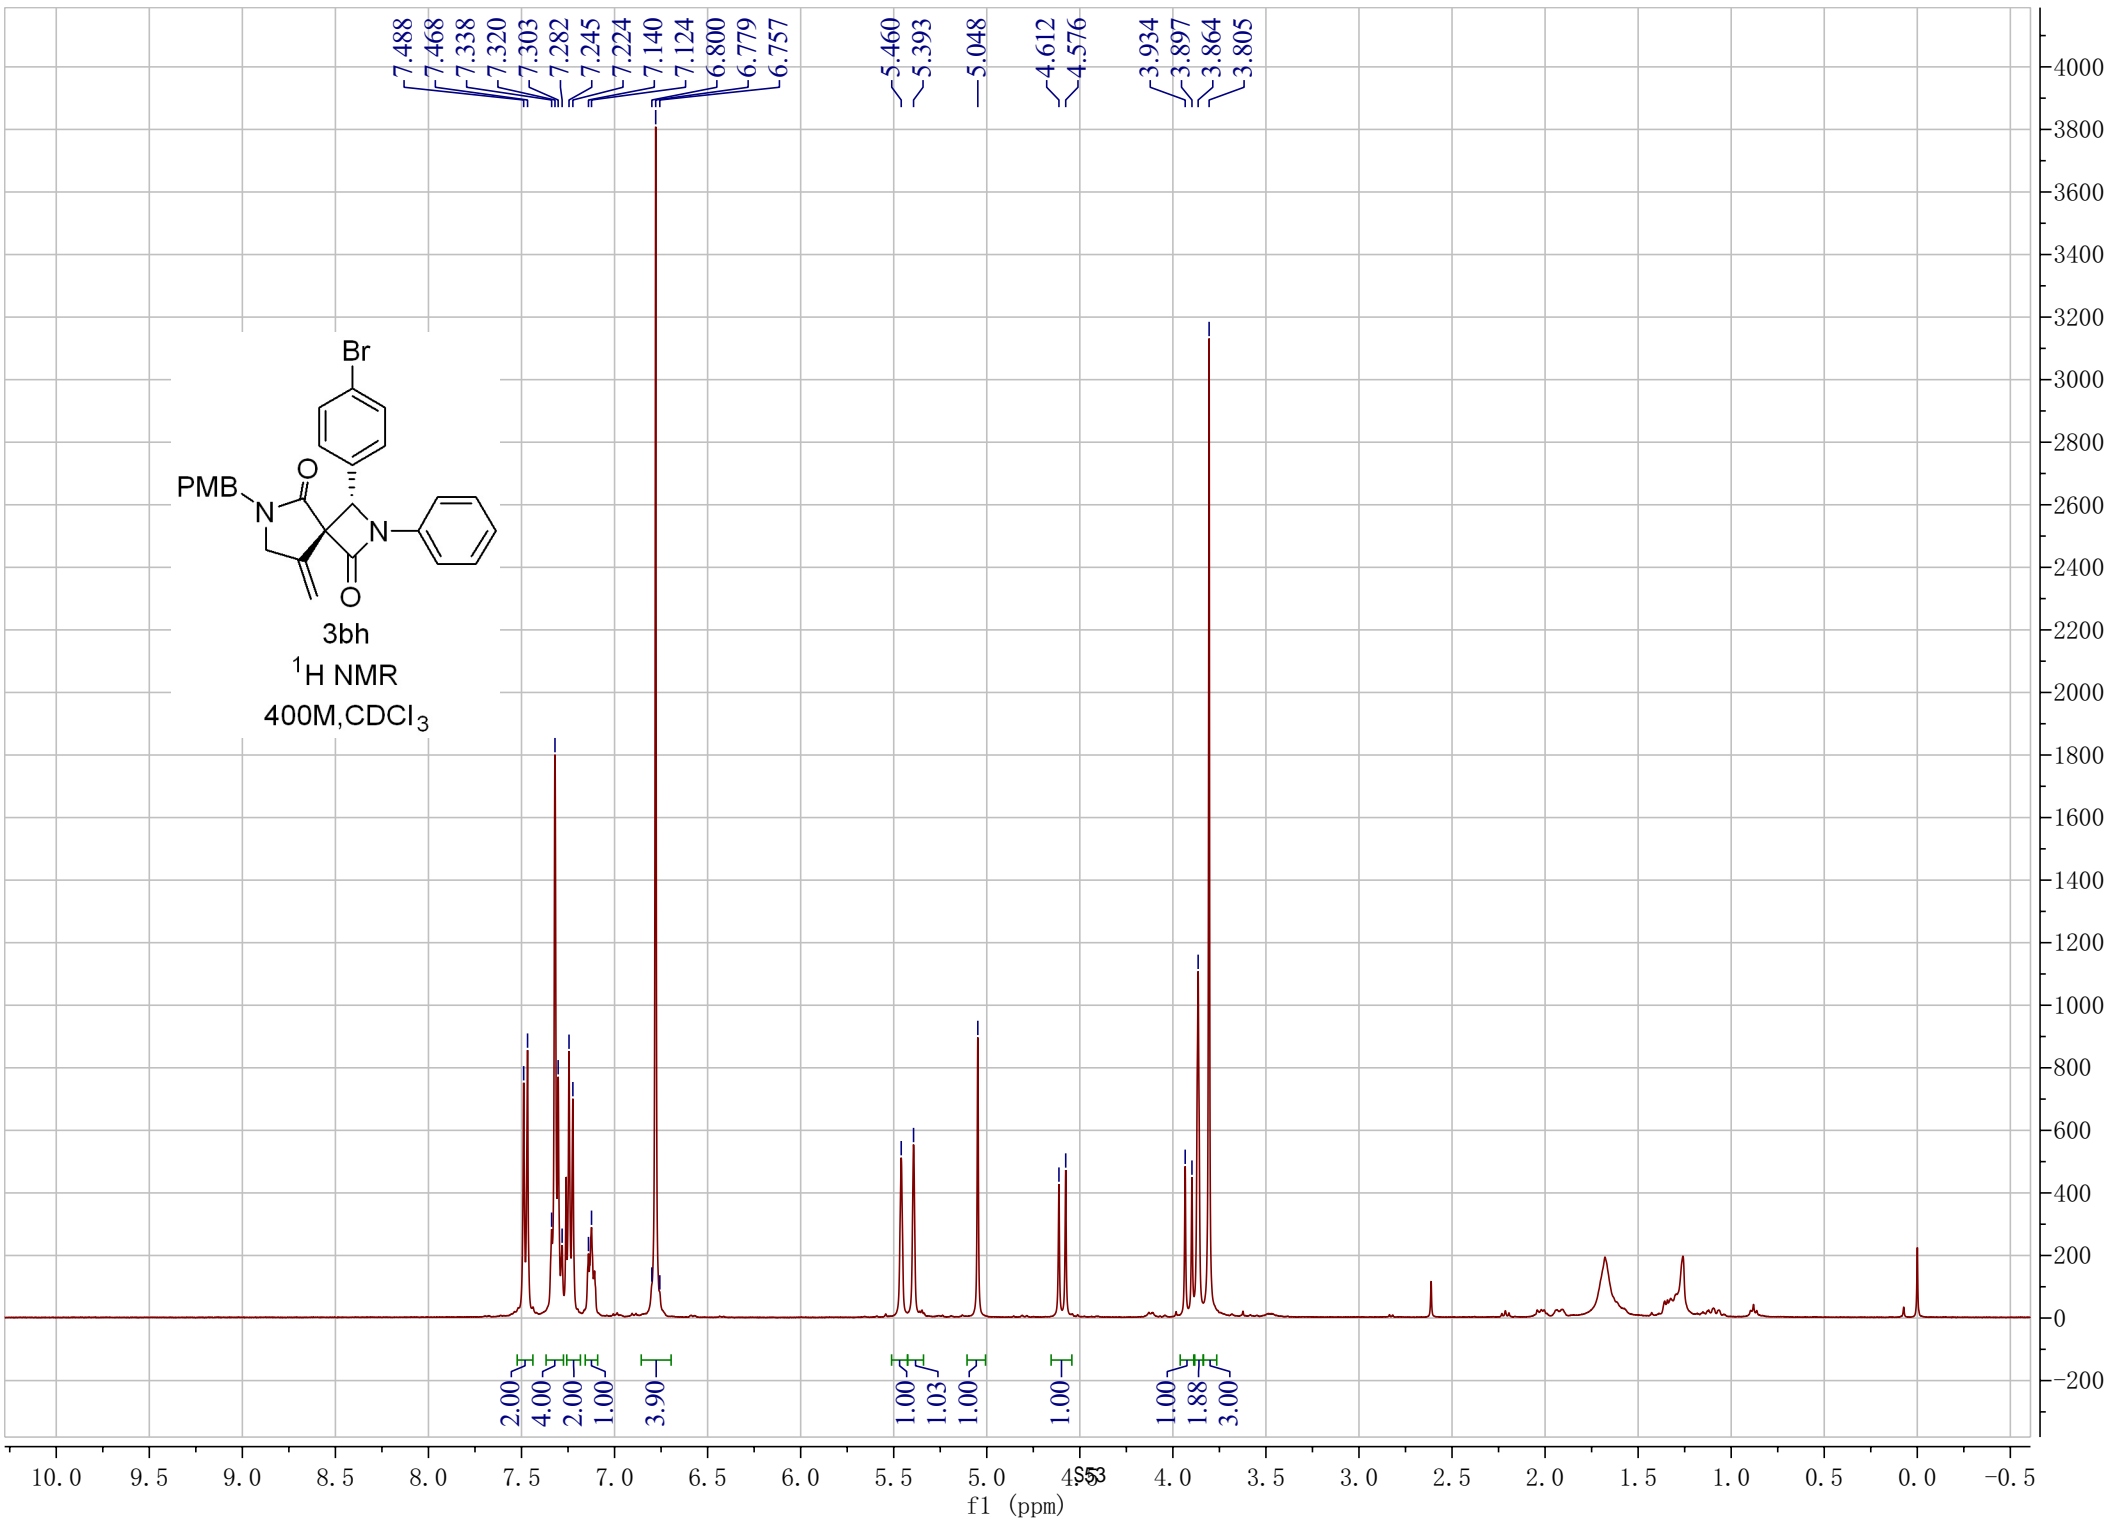

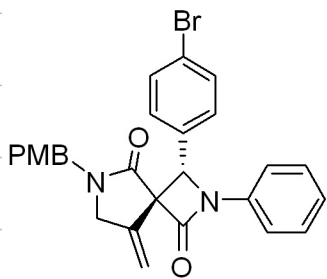

3b  
<sup>13</sup>CNMR  
100M, CDCl<sub>3</sub>

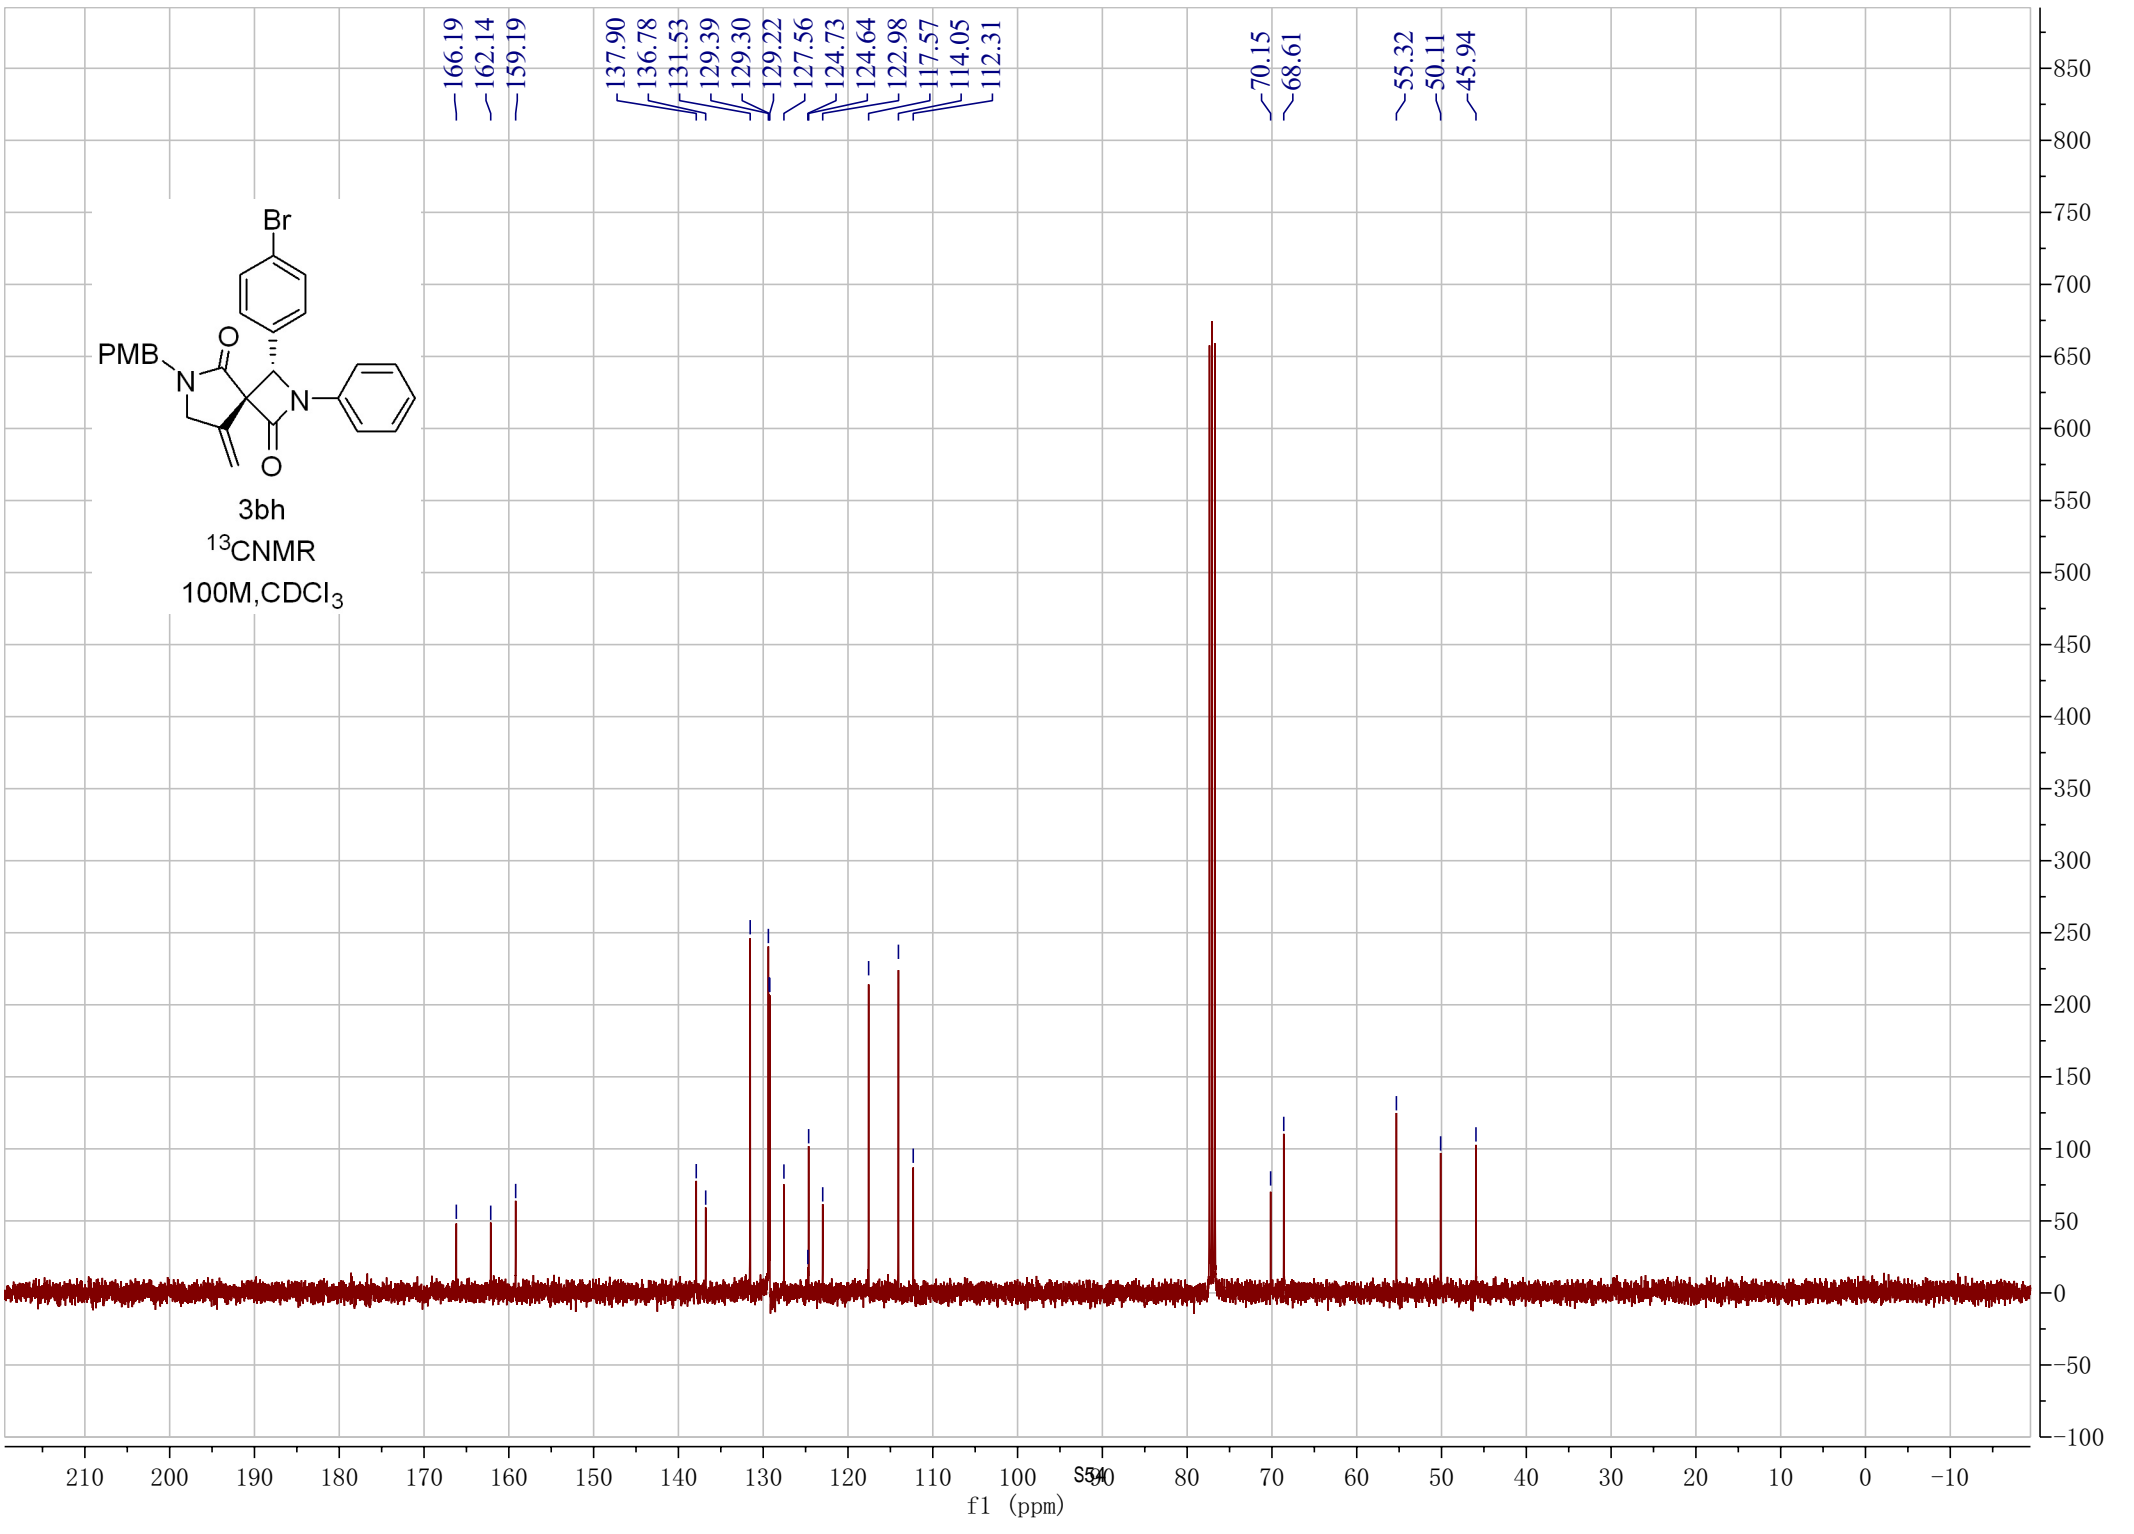

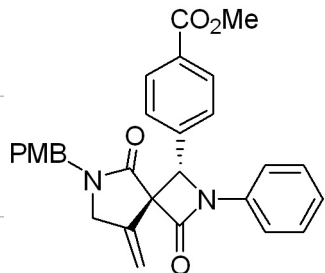

3bi

<sup>1</sup>H NMR  
400MHz CDCl<sub>3</sub>

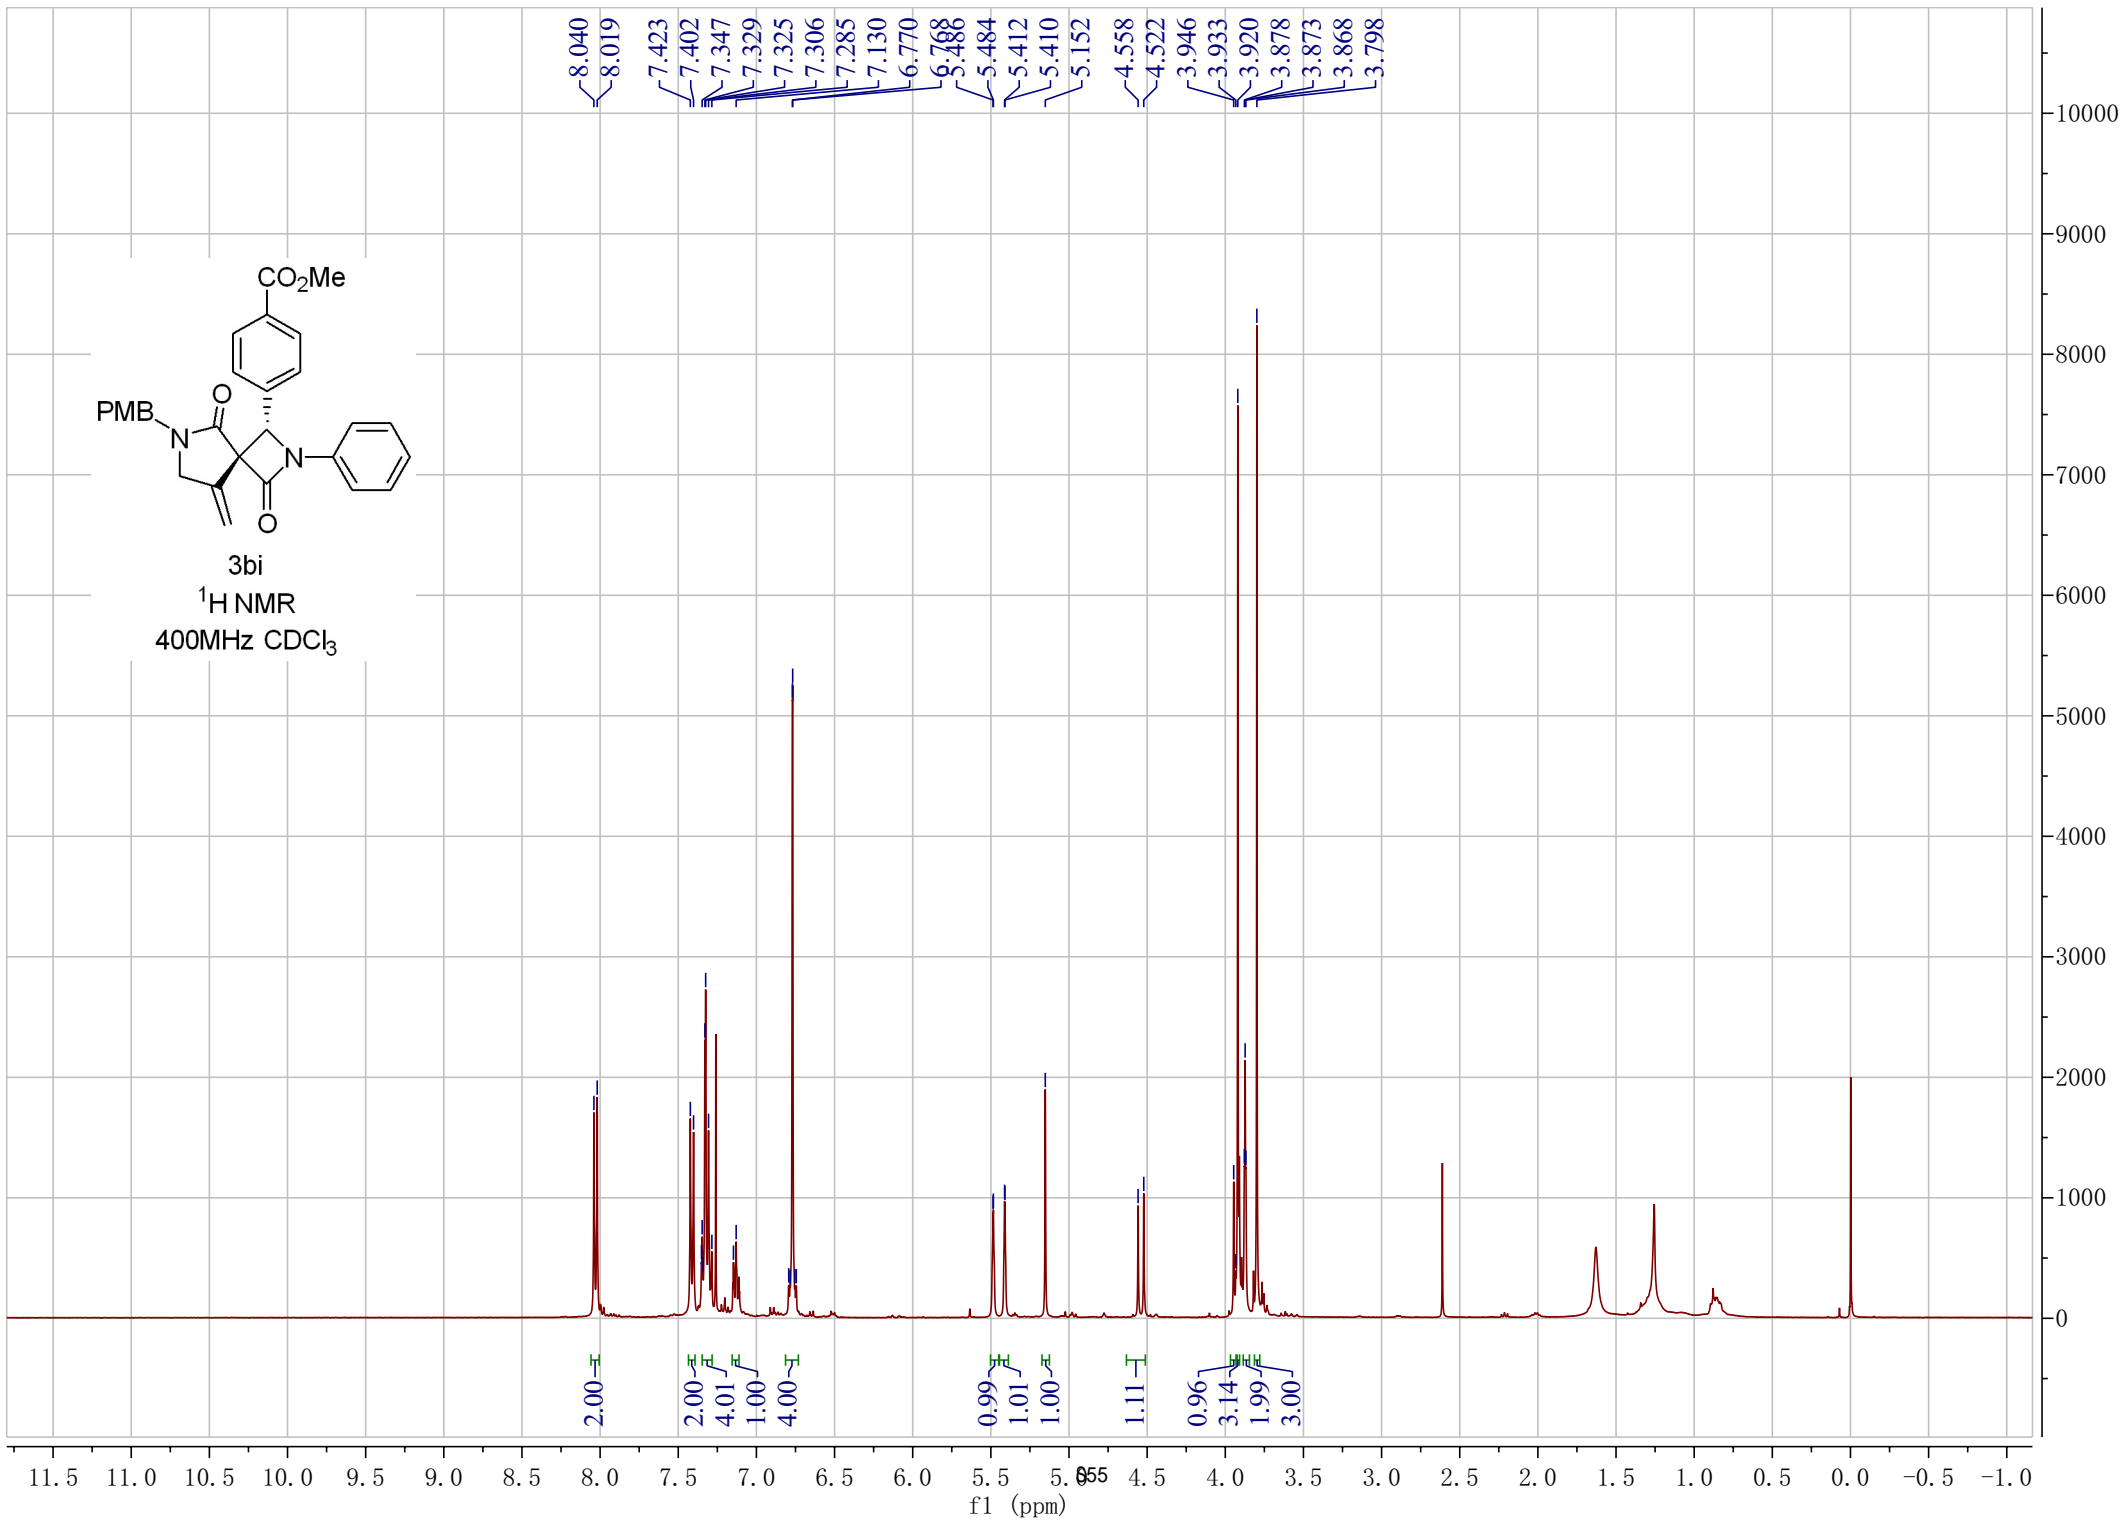

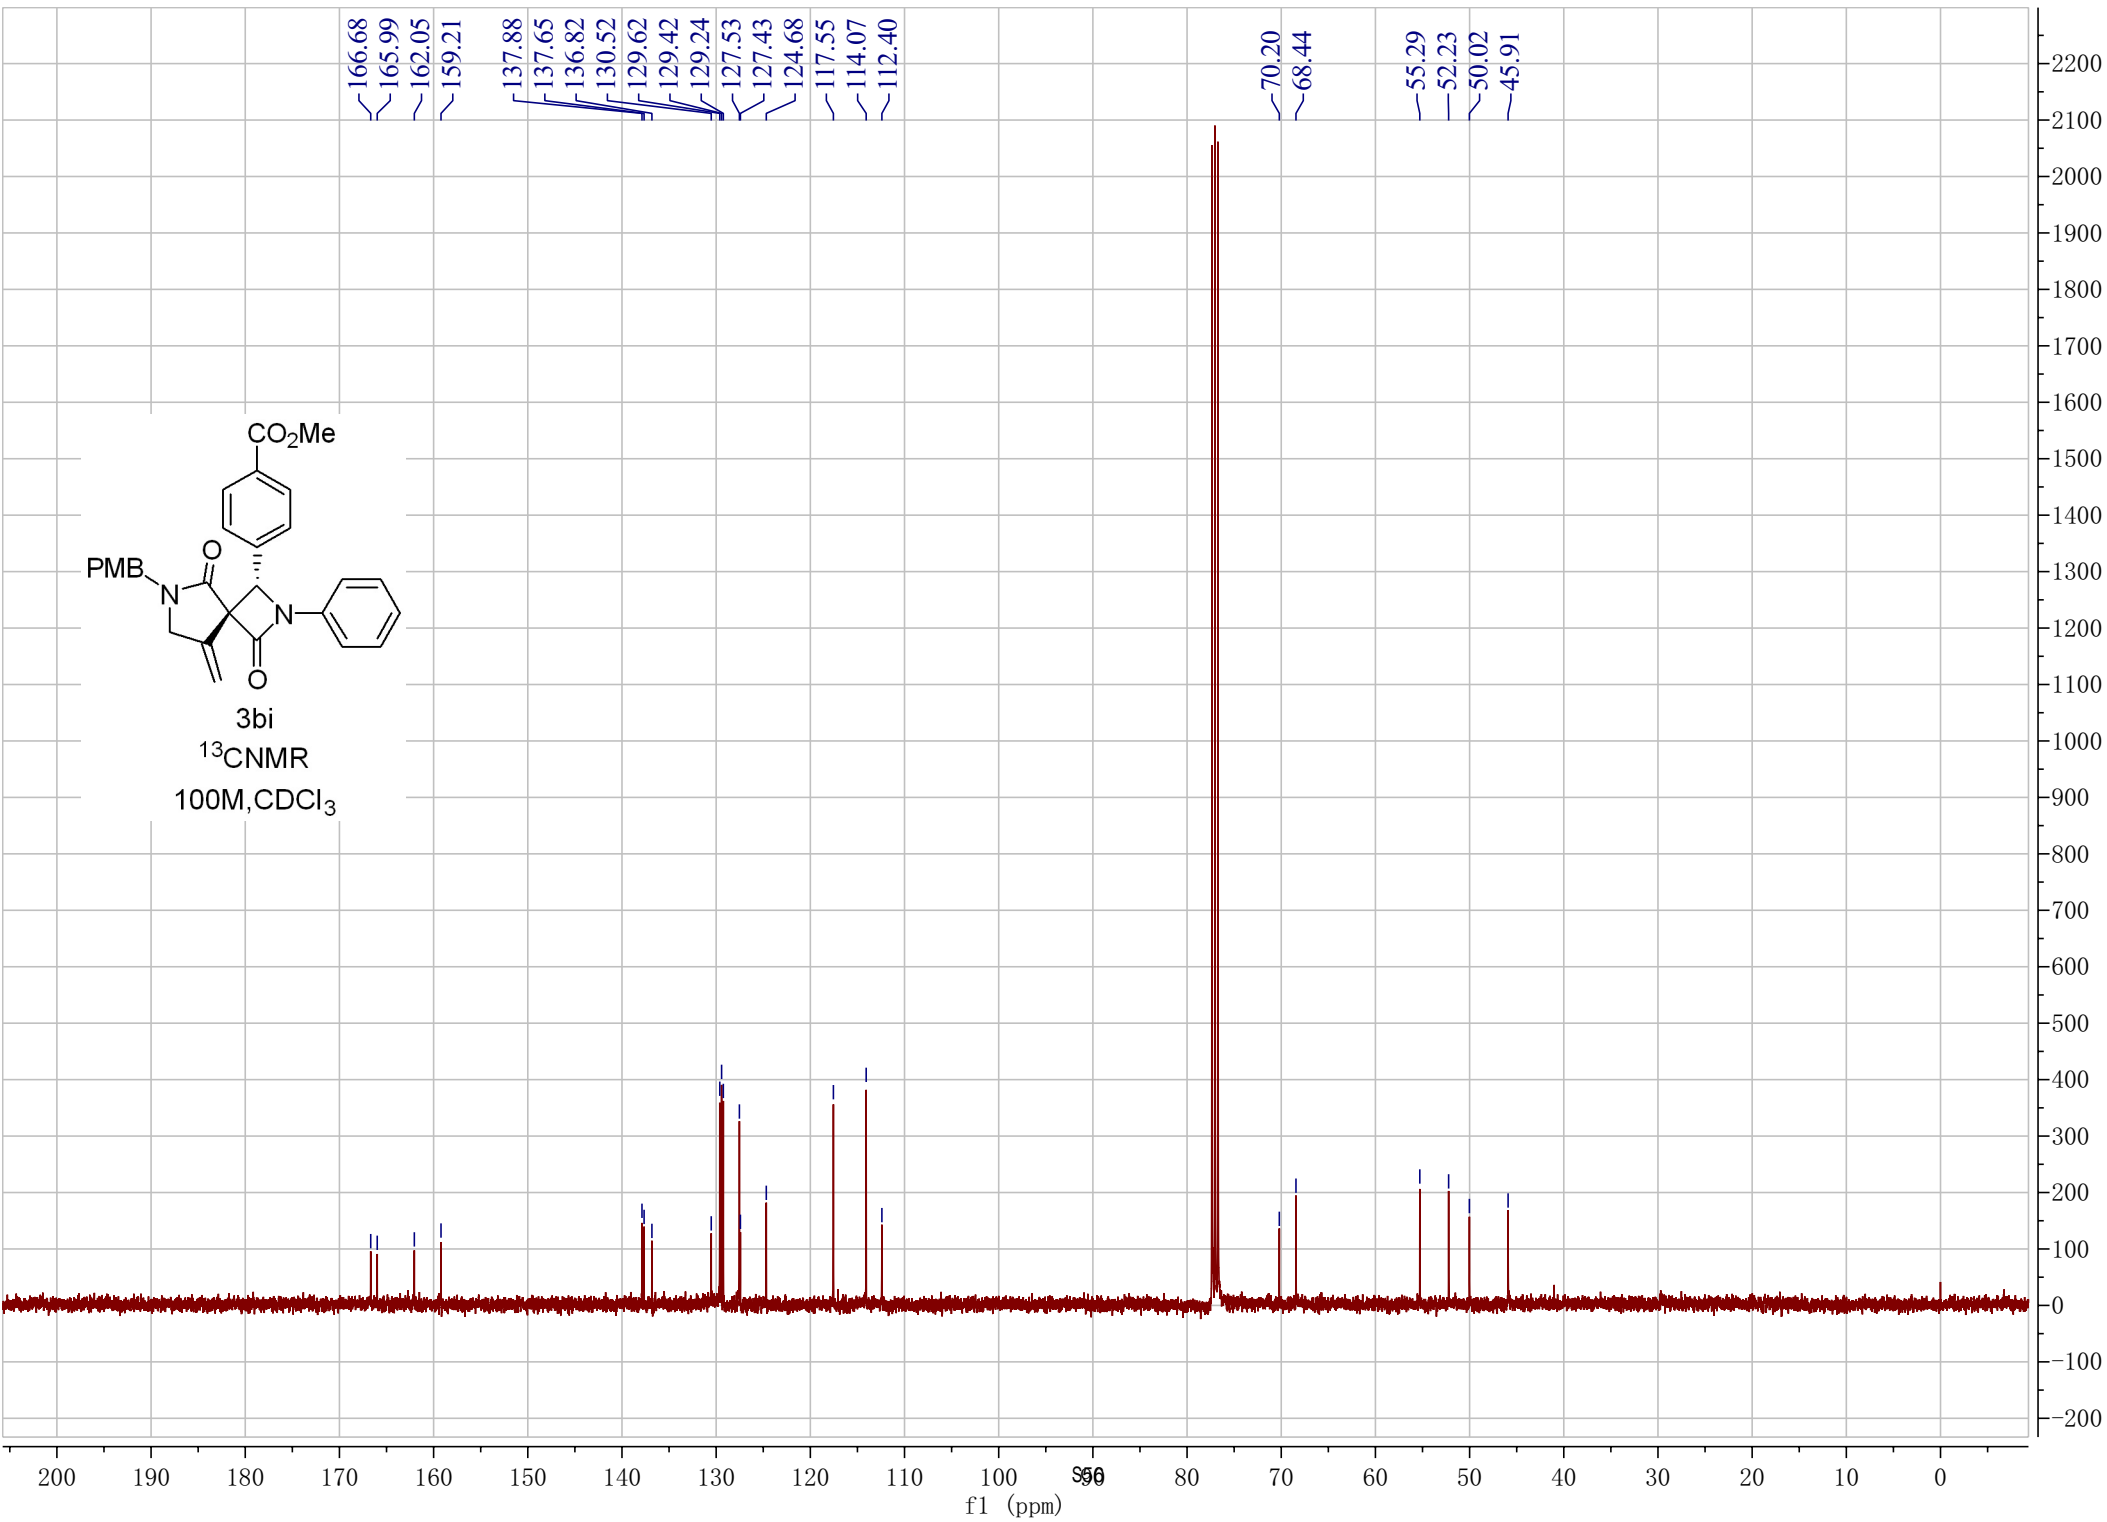



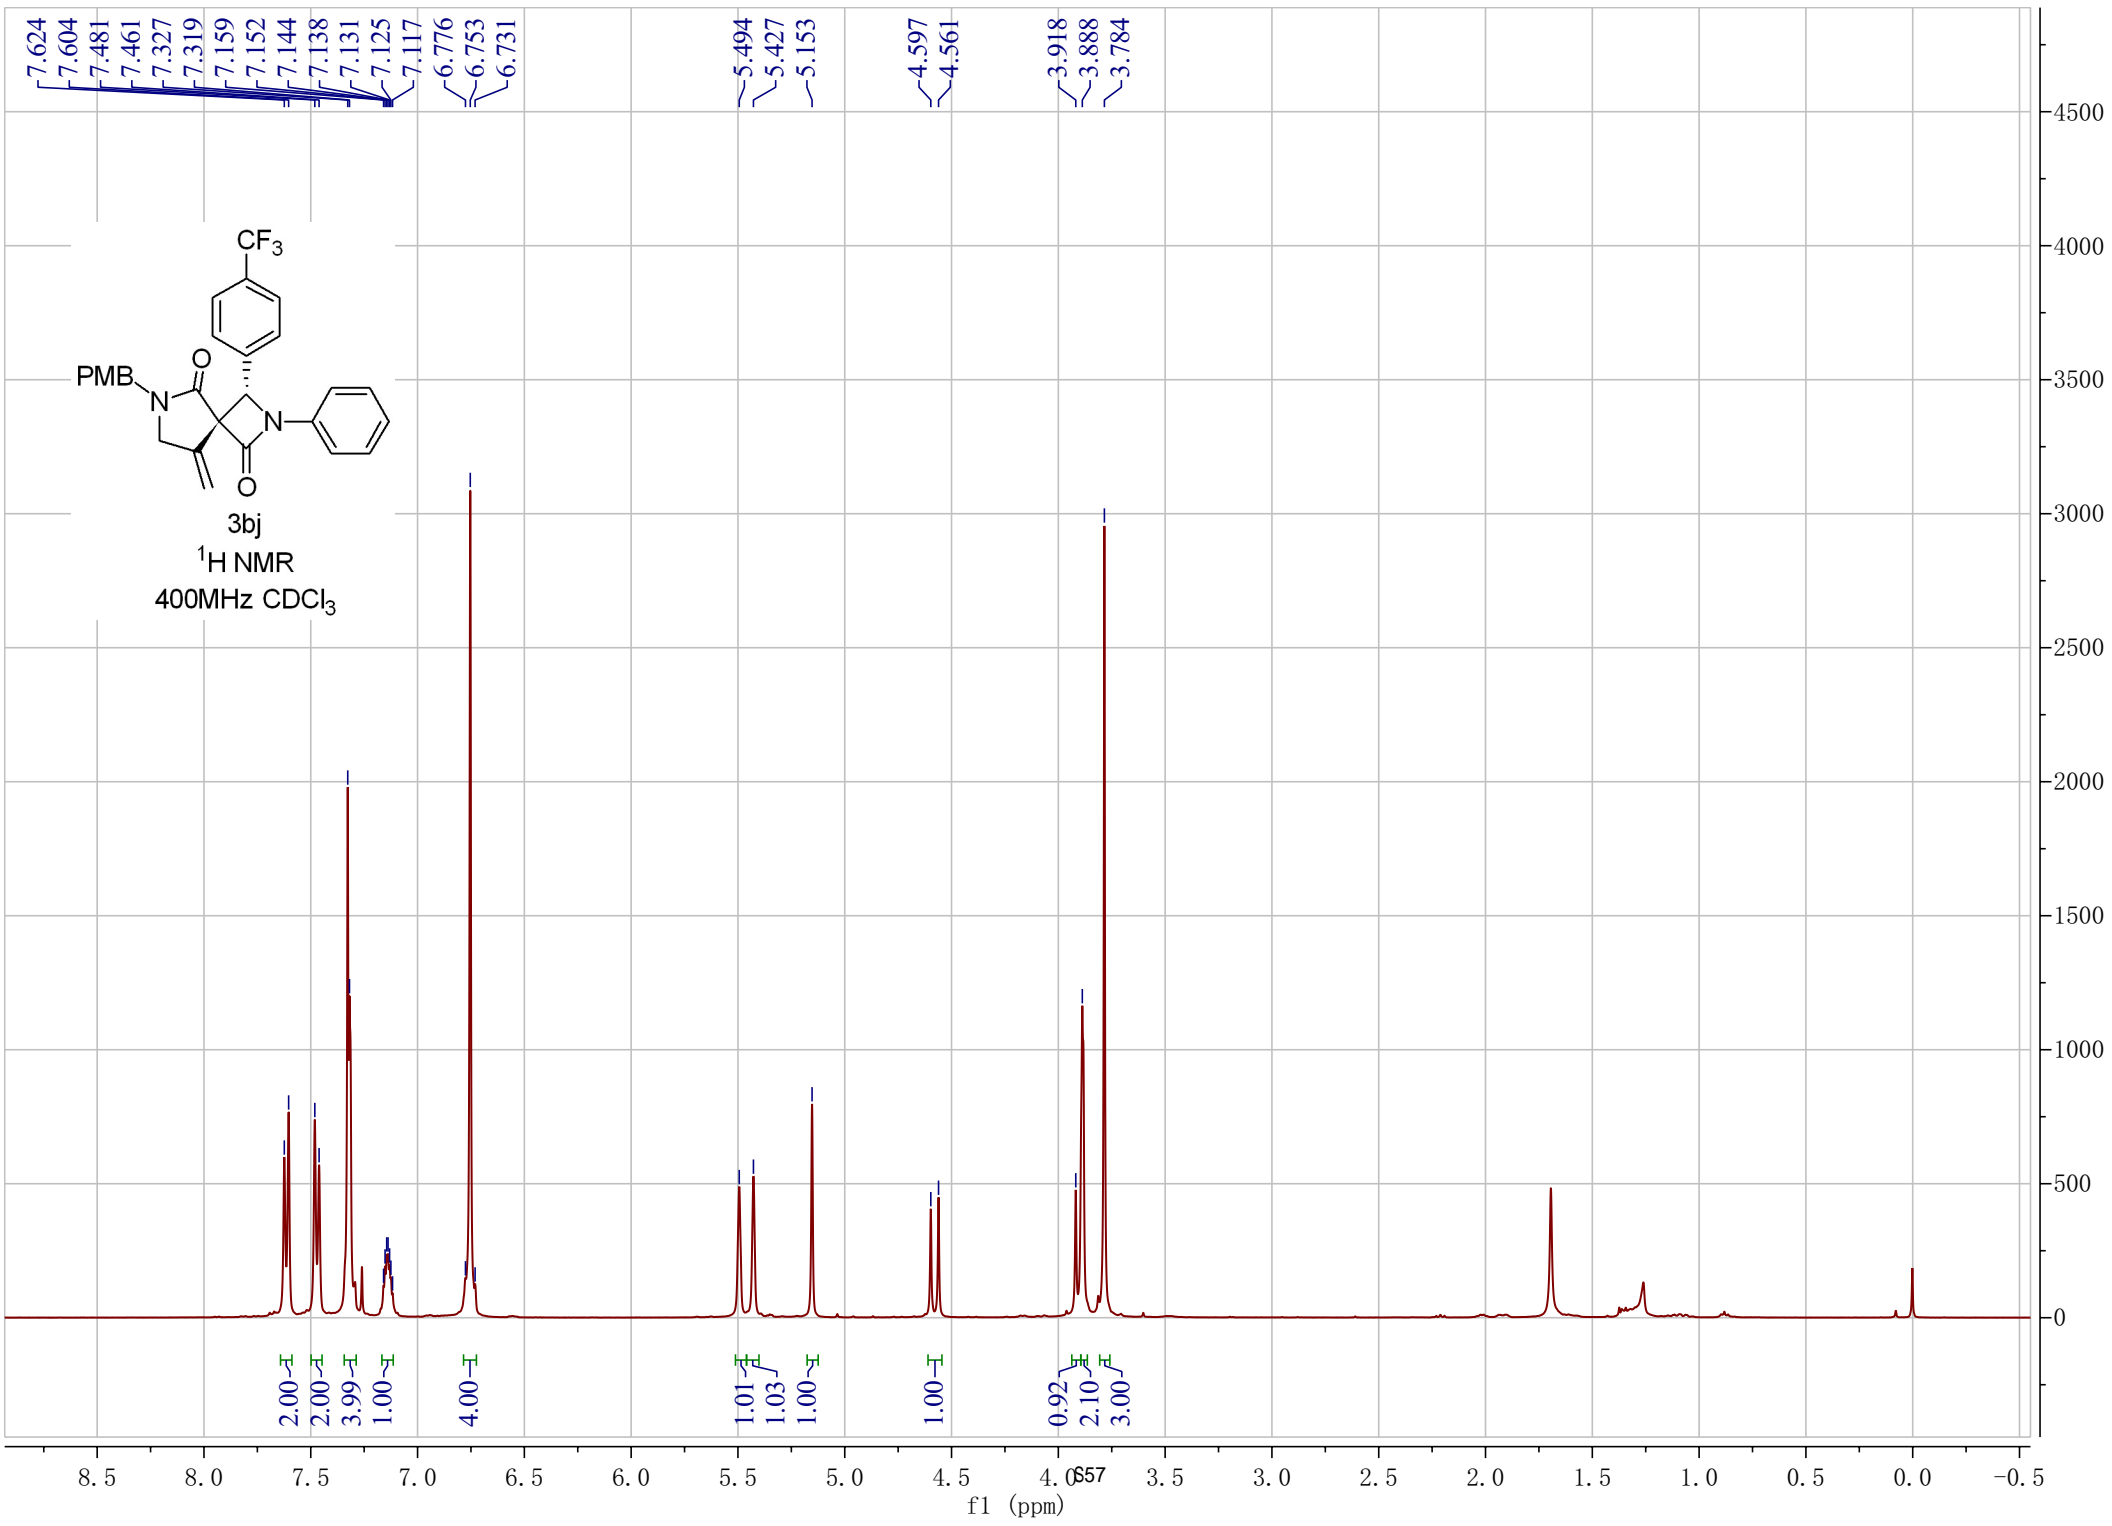

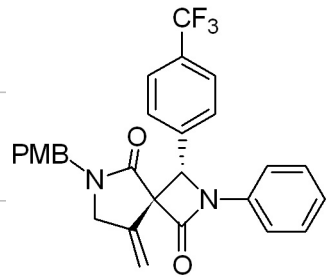

3bj  
 $^{13}\text{C}$ NMR  
100M,  $\text{CDCl}_3$

165.99  
162.05  
159.24  
137.71  
136.70  
136.64  
131.30  
130.98  
130.66  
130.28  
129.41  
129.30  
128.00  
127.46  
125.36  
125.32  
125.28  
125.24  
124.77  
117.54  
114.02  
112.60

70.17  
68.30

55.24  
50.10  
45.95

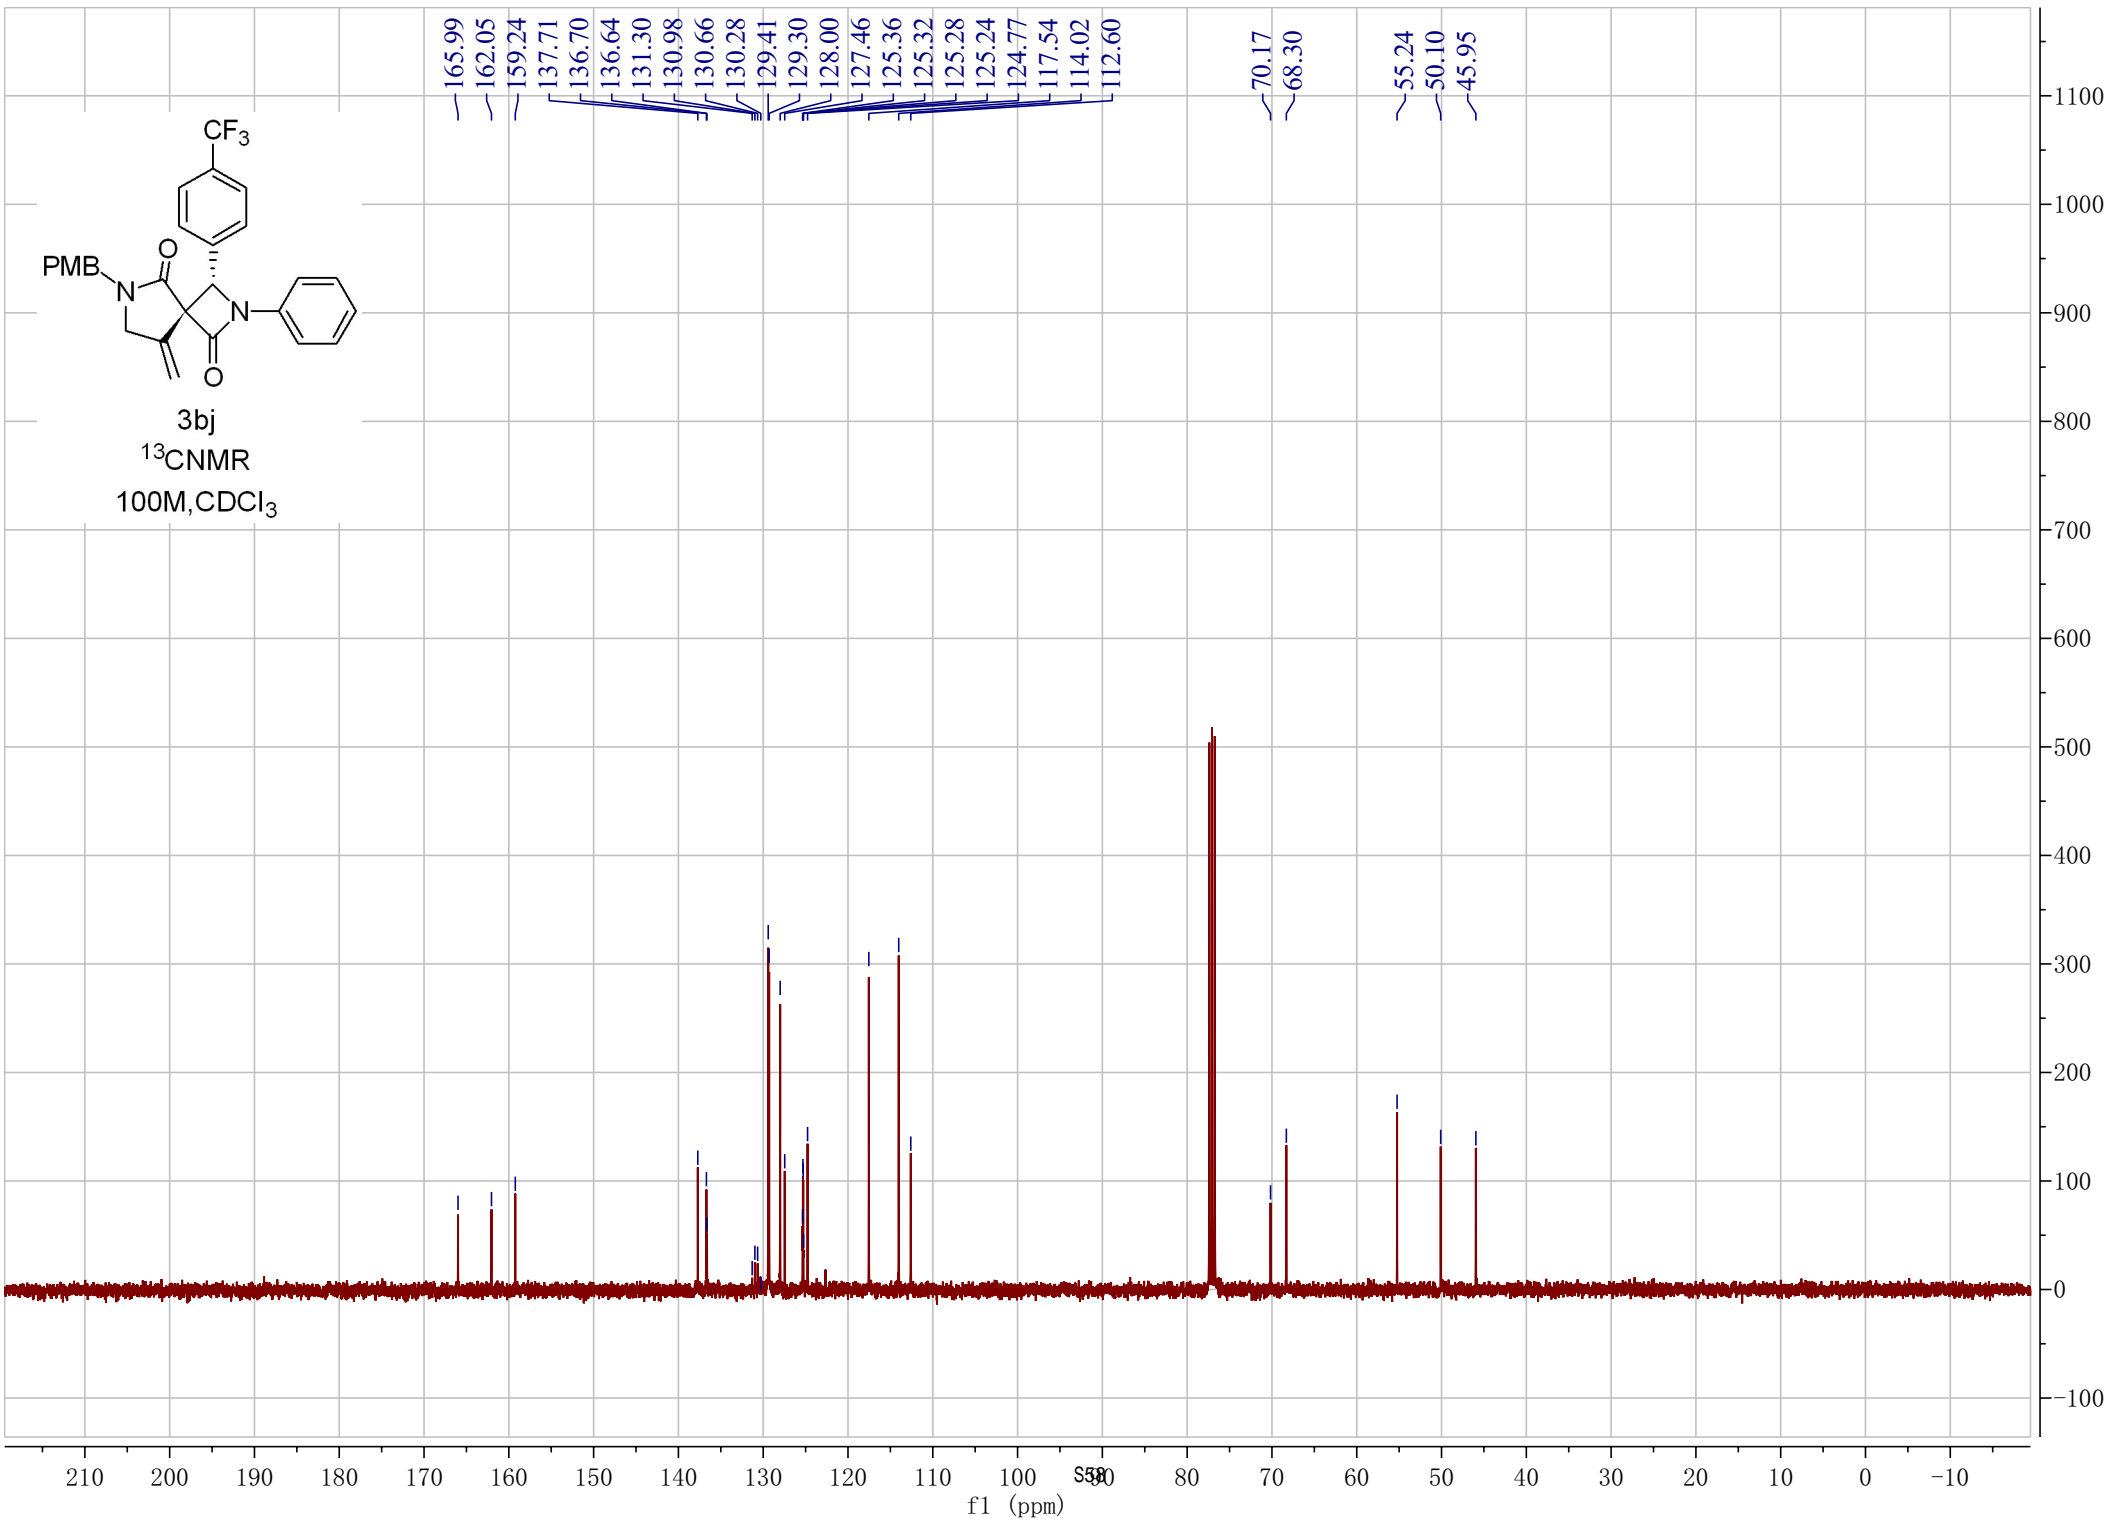

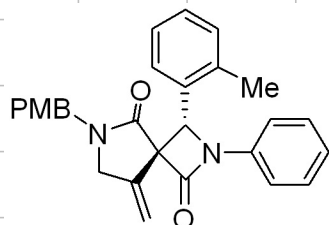

**3bk**  
**<sup>1</sup>H NMR**  
**400M, CDCl<sub>3</sub>**

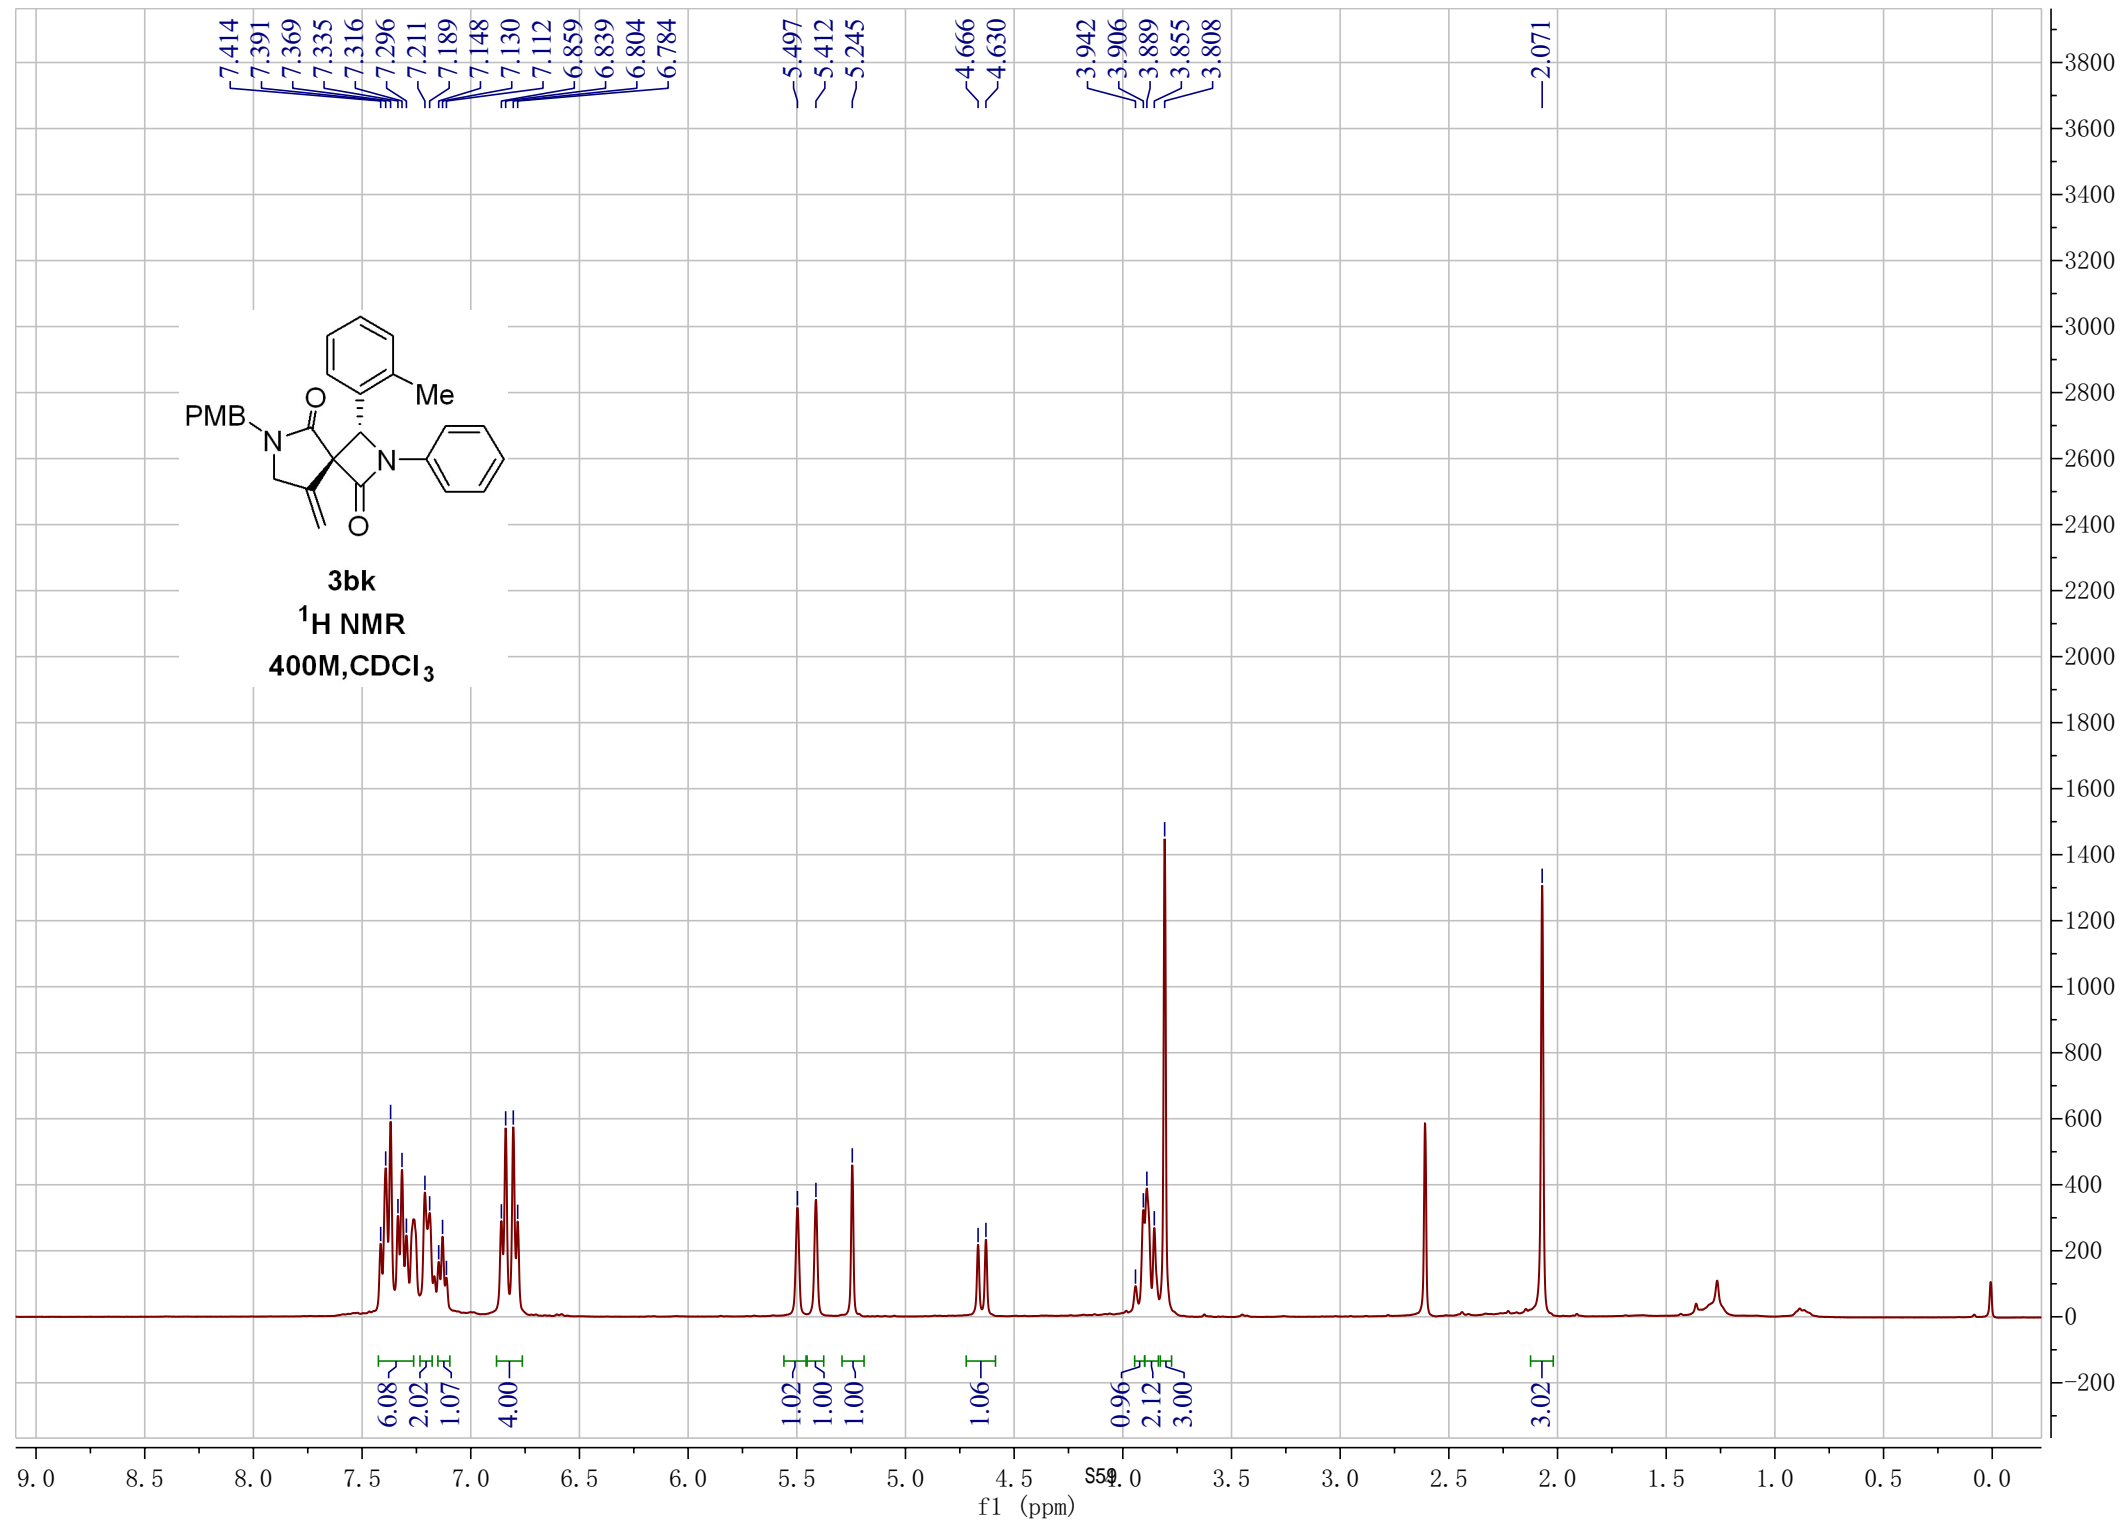

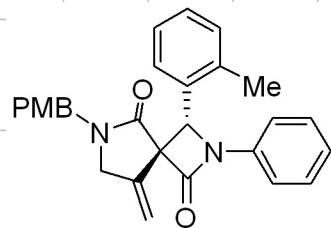

**3bk**  
**<sup>13</sup>C NMR**  
**100M, CDCl<sub>3</sub>**

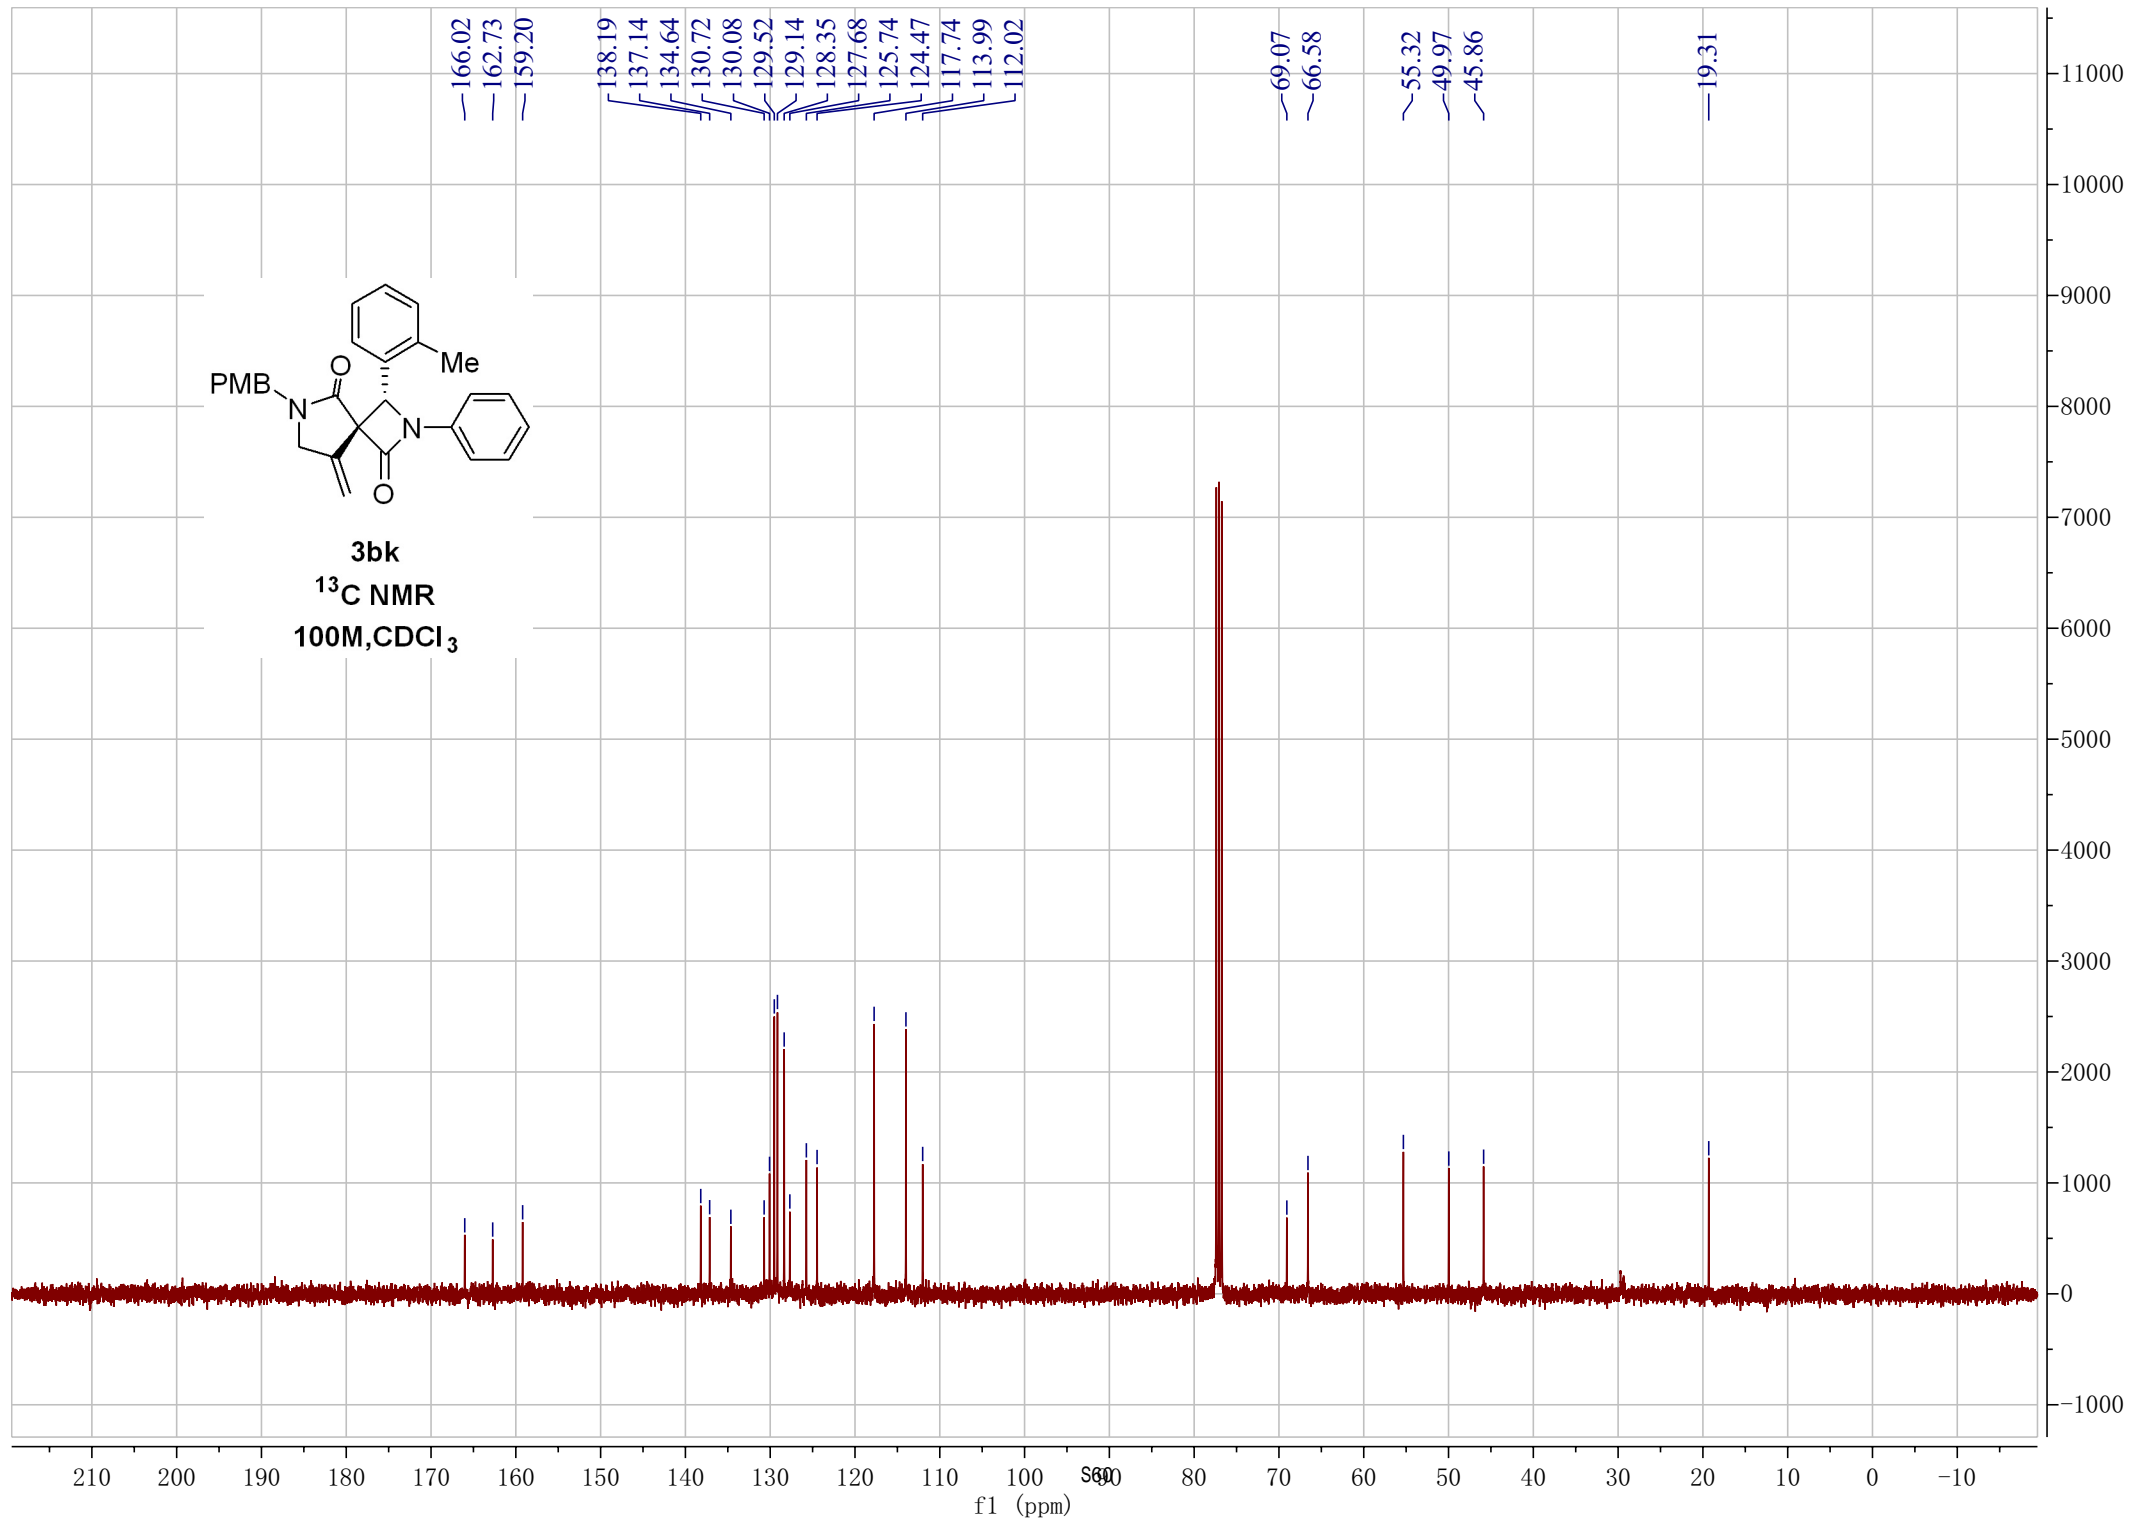

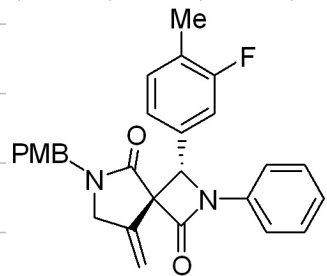

3bl  
<sup>1</sup>H NMR  
400M, CDCl<sub>3</sub>

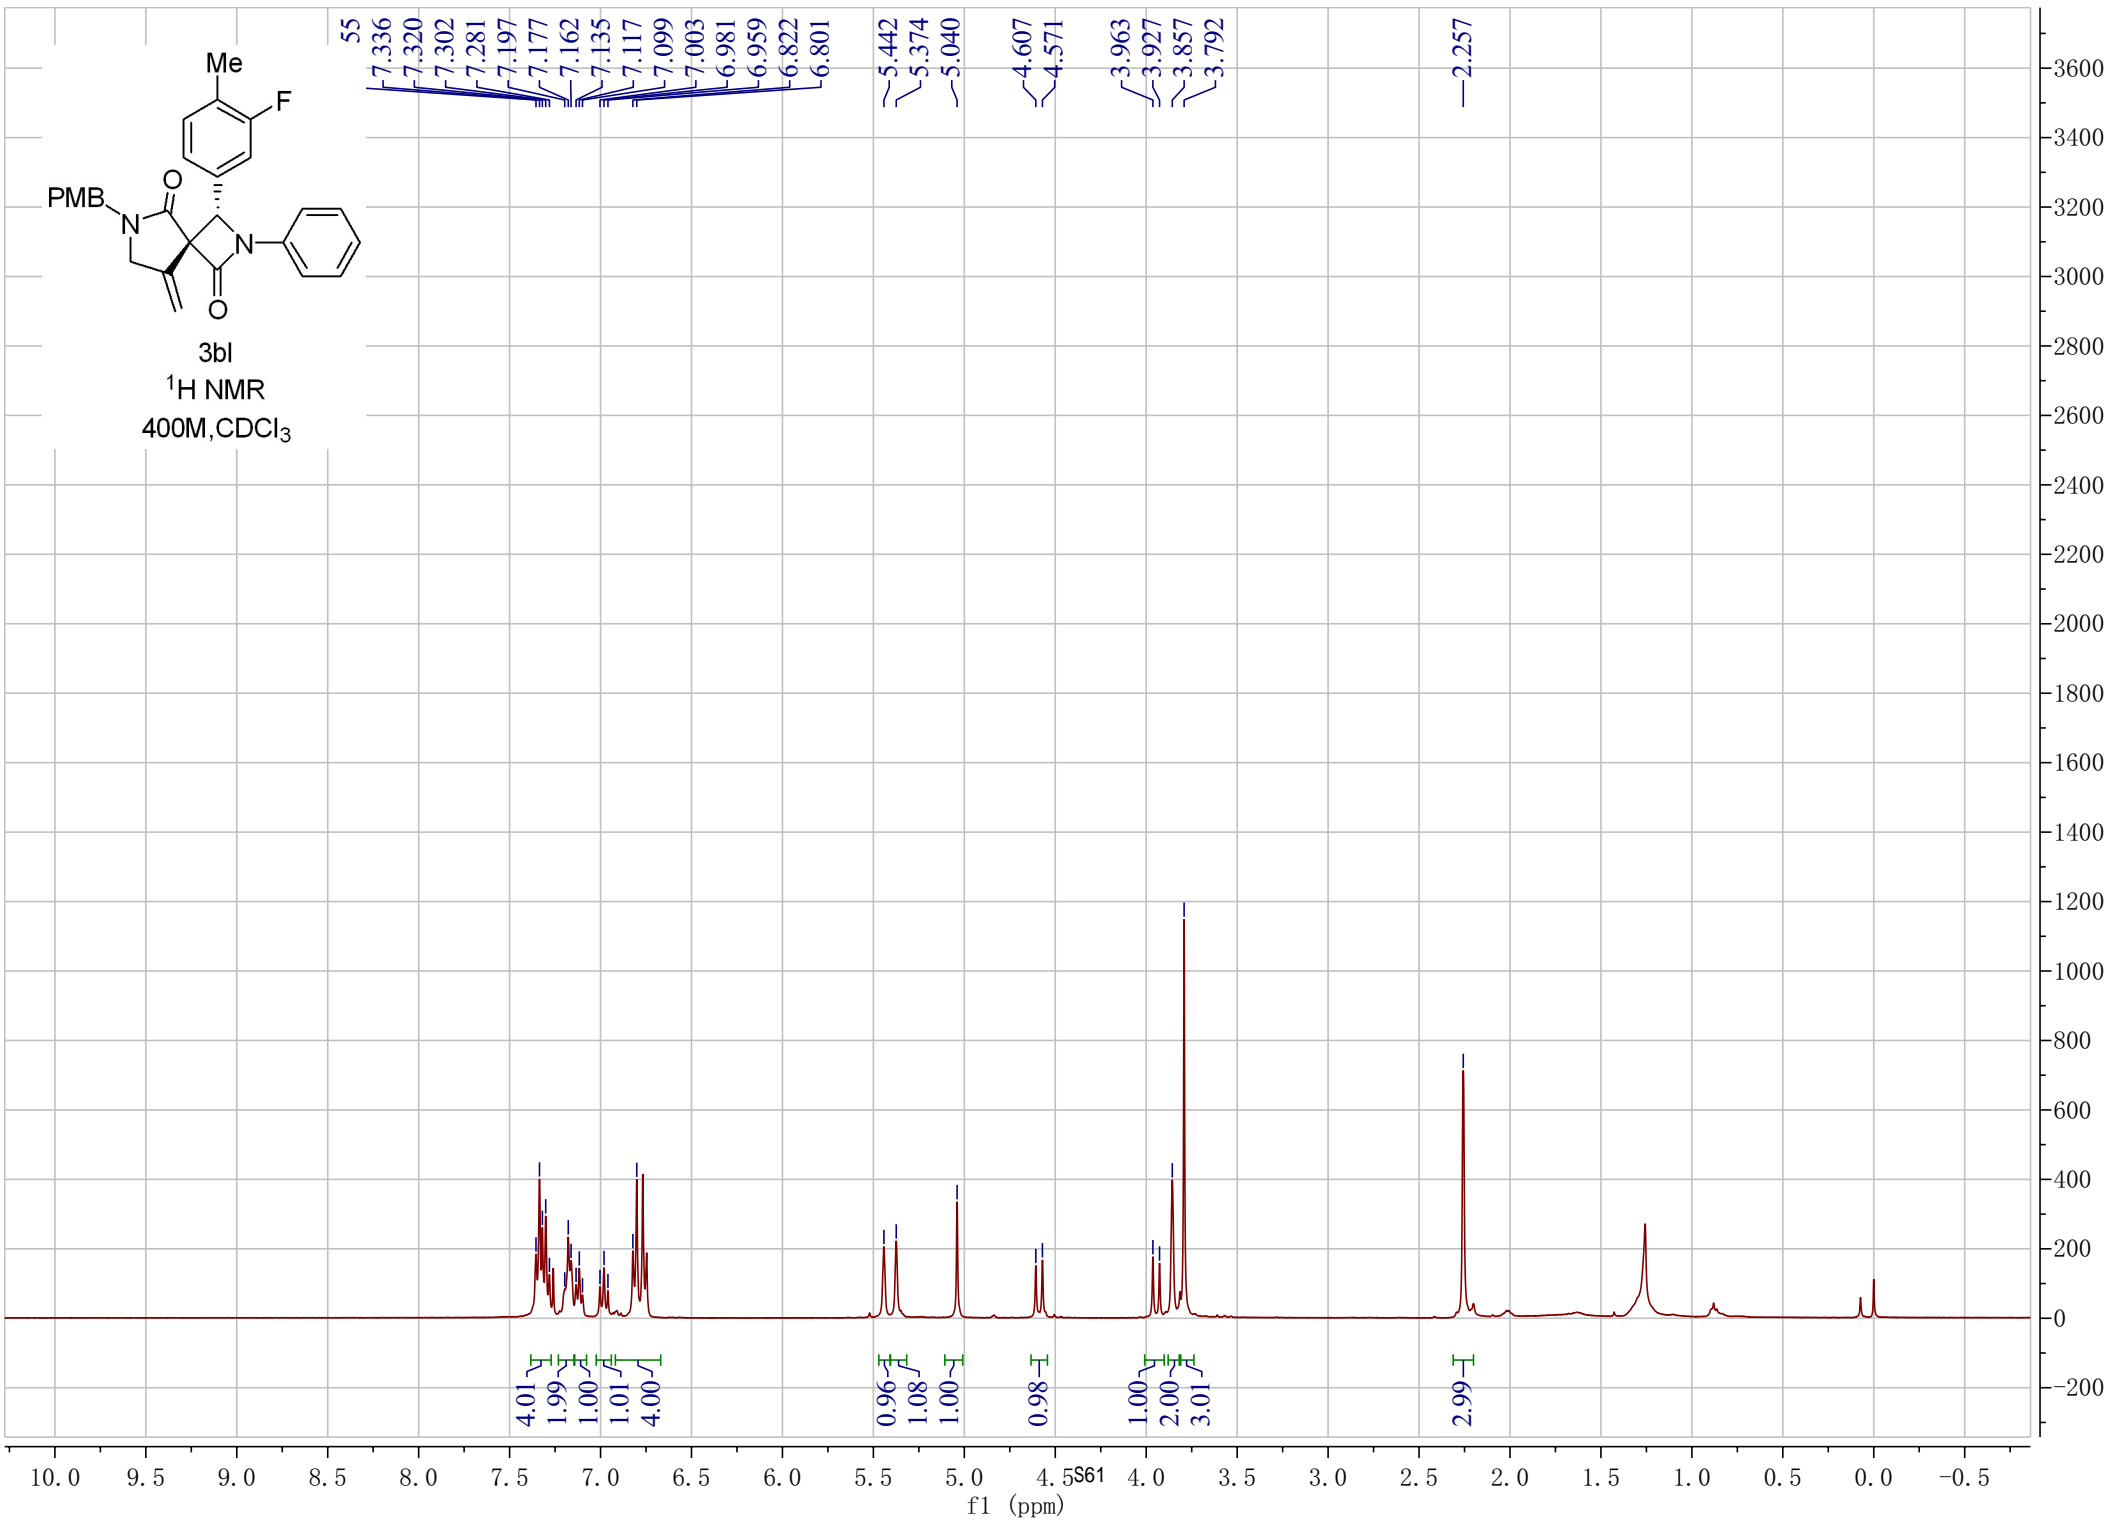

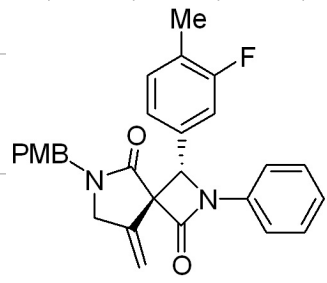

3bl  
<sup>13</sup>CNMR  
100M, CDCl<sub>3</sub>

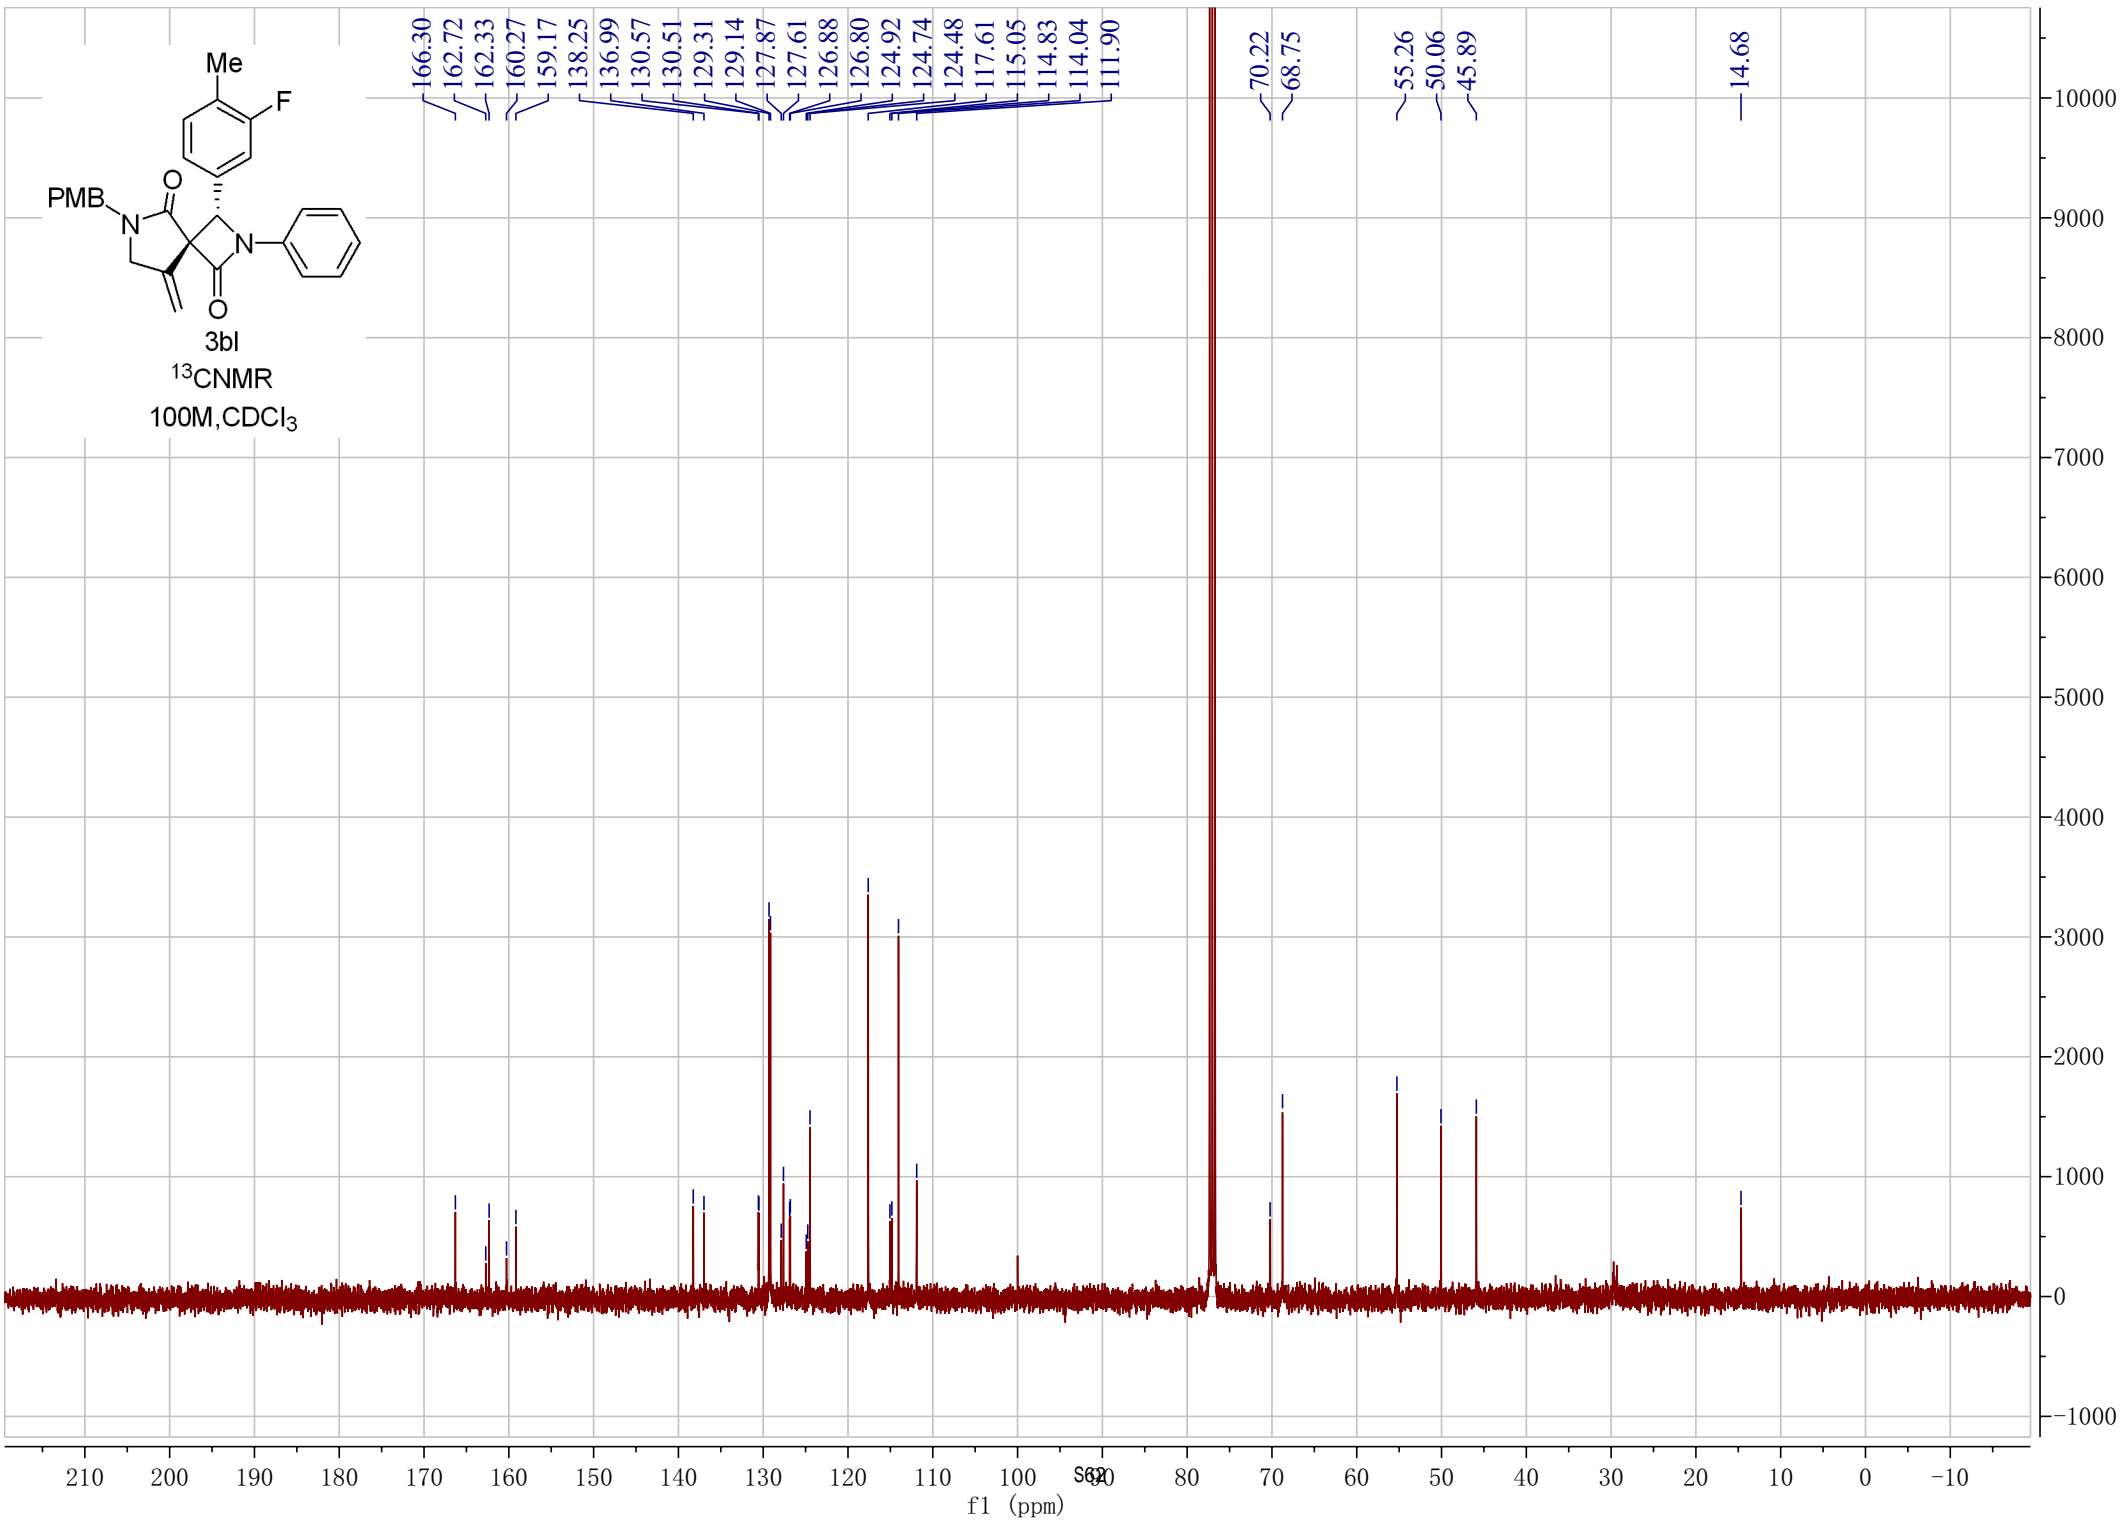

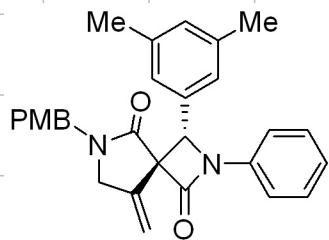

3bm  
<sup>1</sup>H NMR  
400M, CDCl<sub>3</sub>

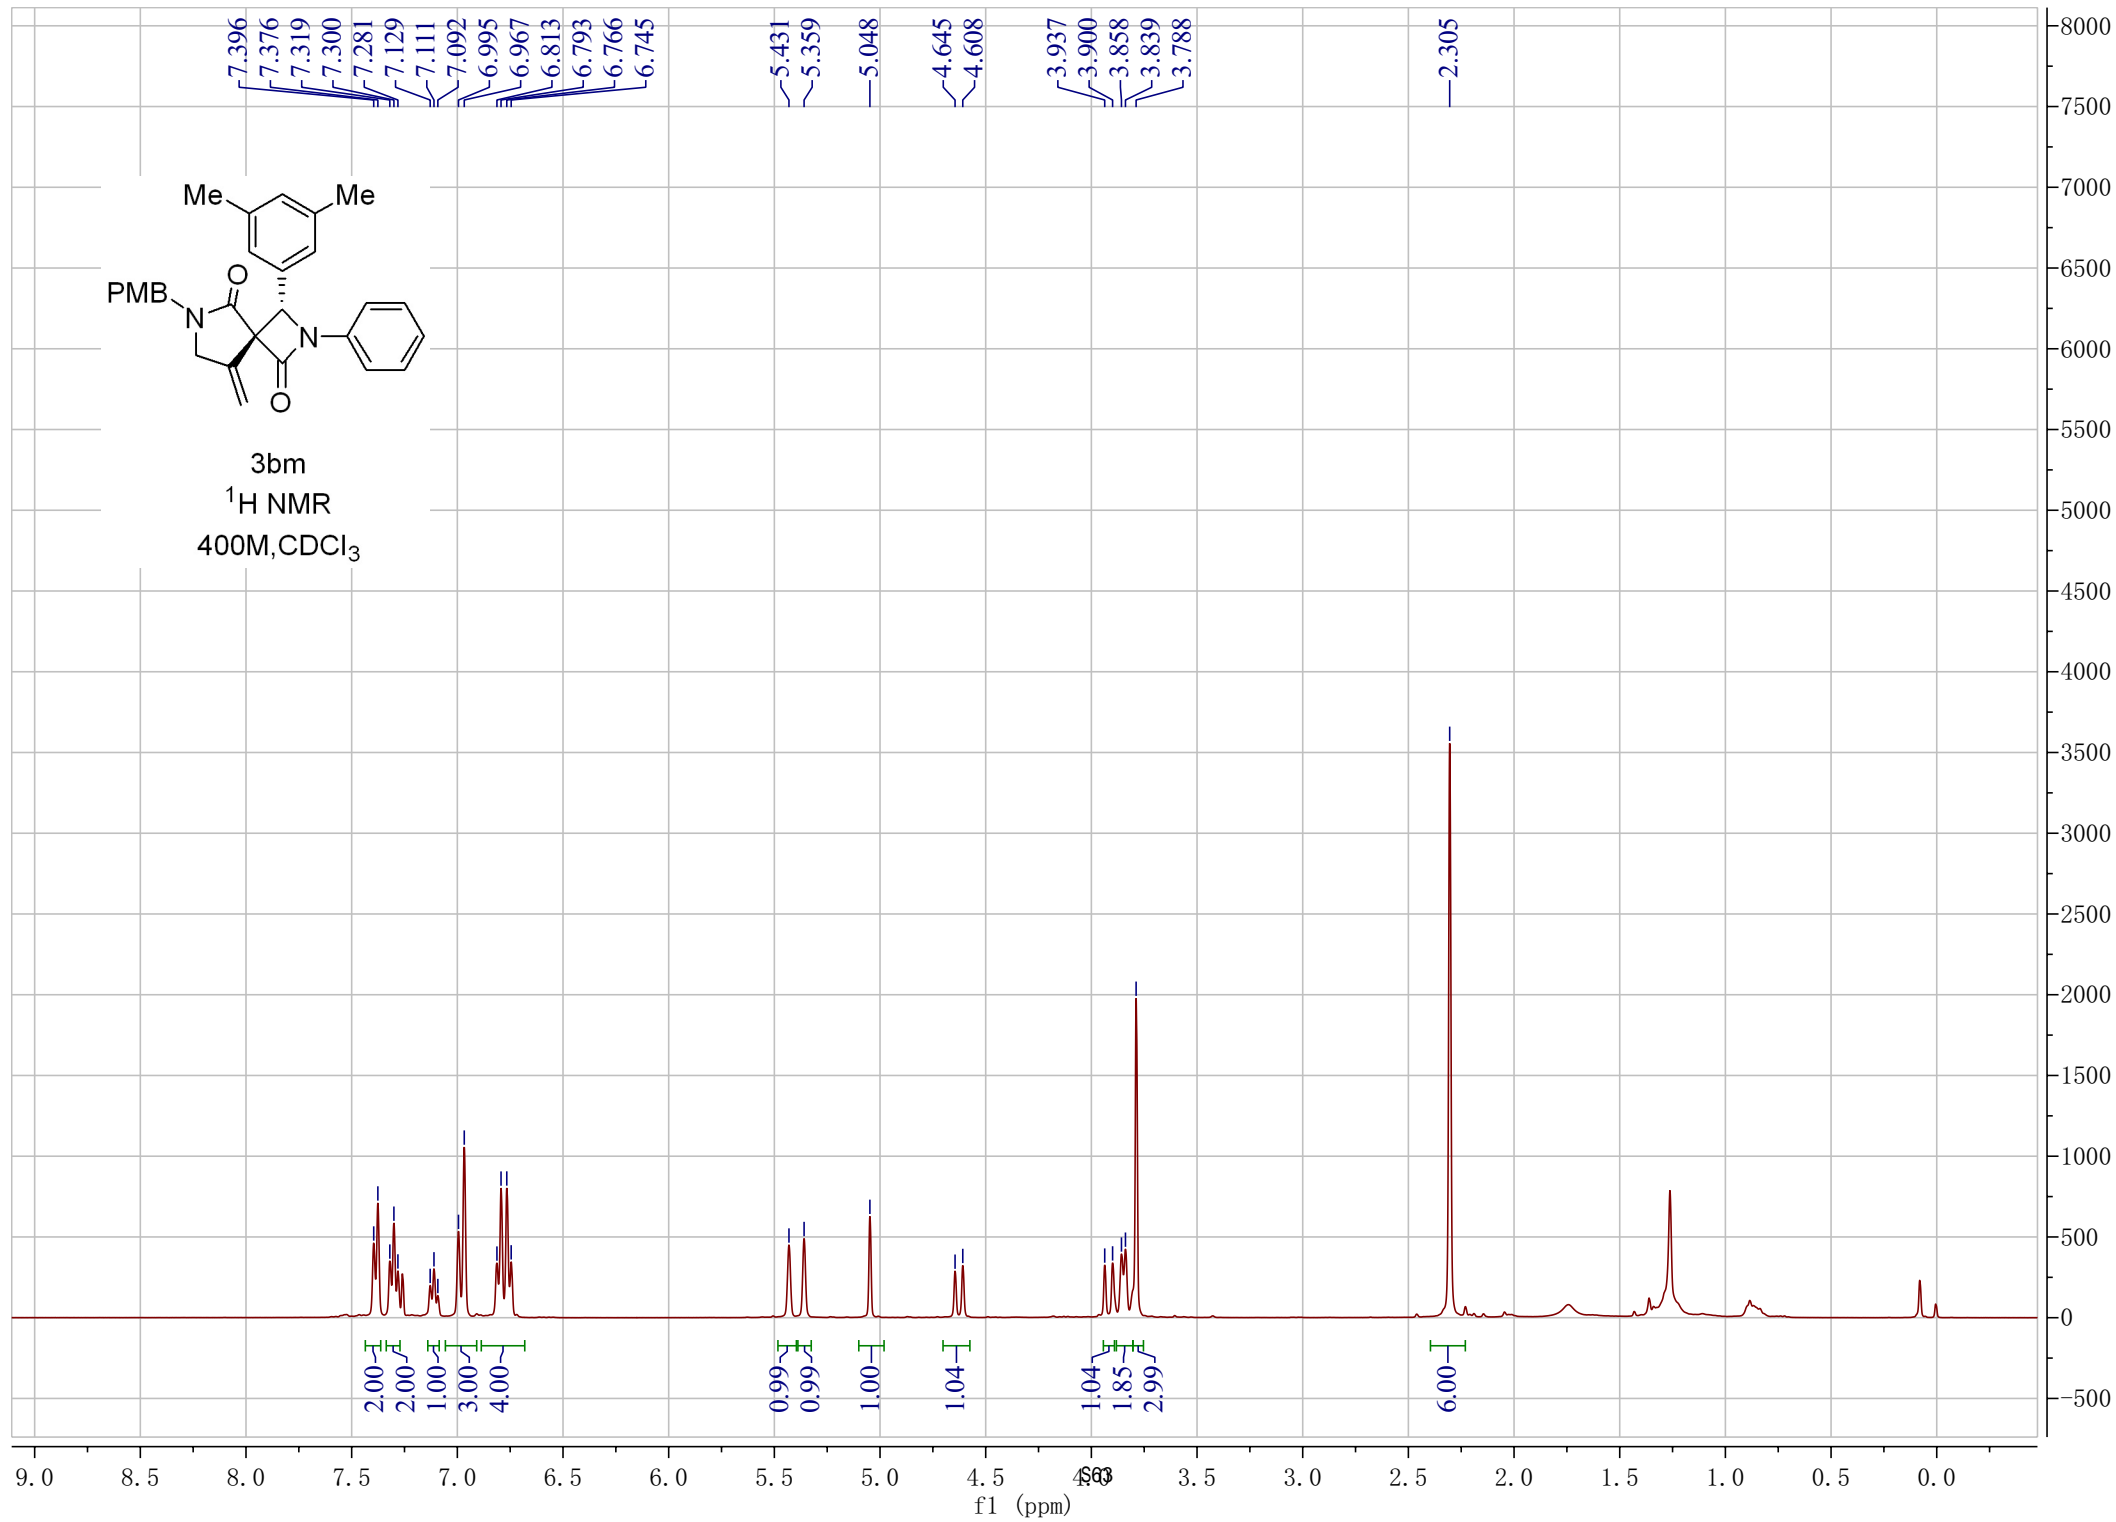

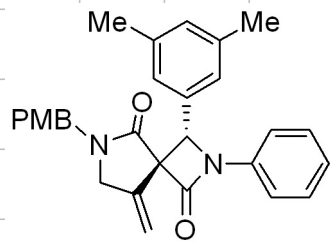

3bm  
<sup>13</sup>CNMR  
100M, CDCl<sub>3</sub>

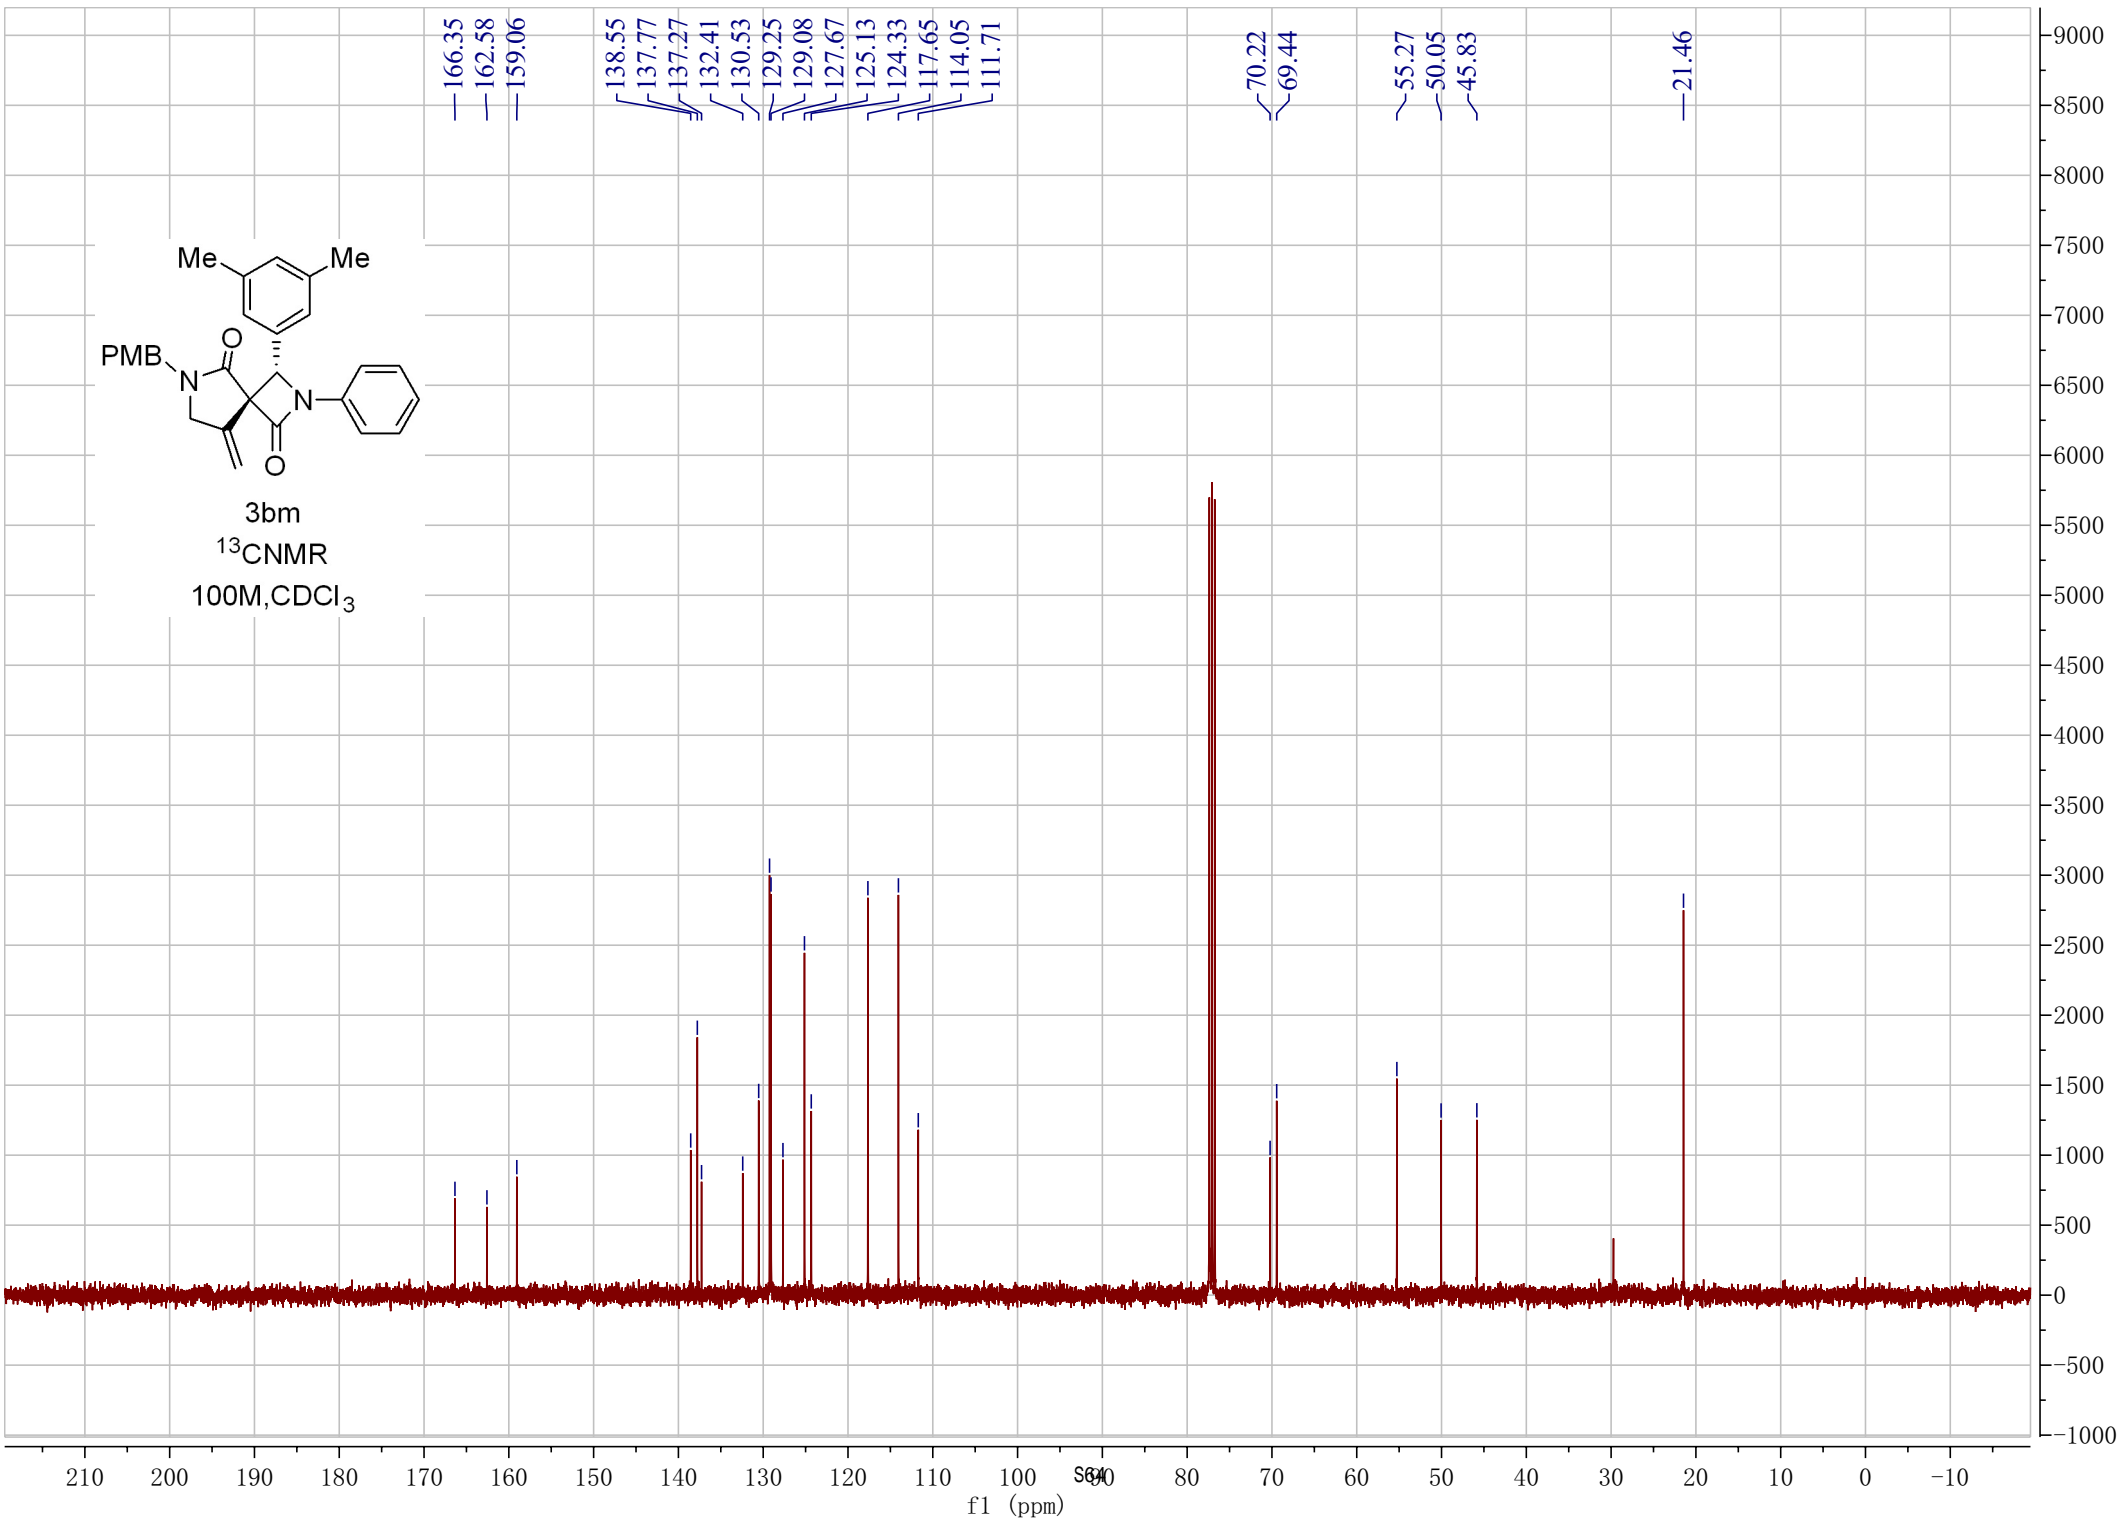



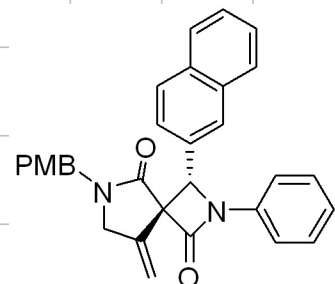

3bn  
<sup>1</sup>H NMR  
400M, CDCl<sub>3</sub>

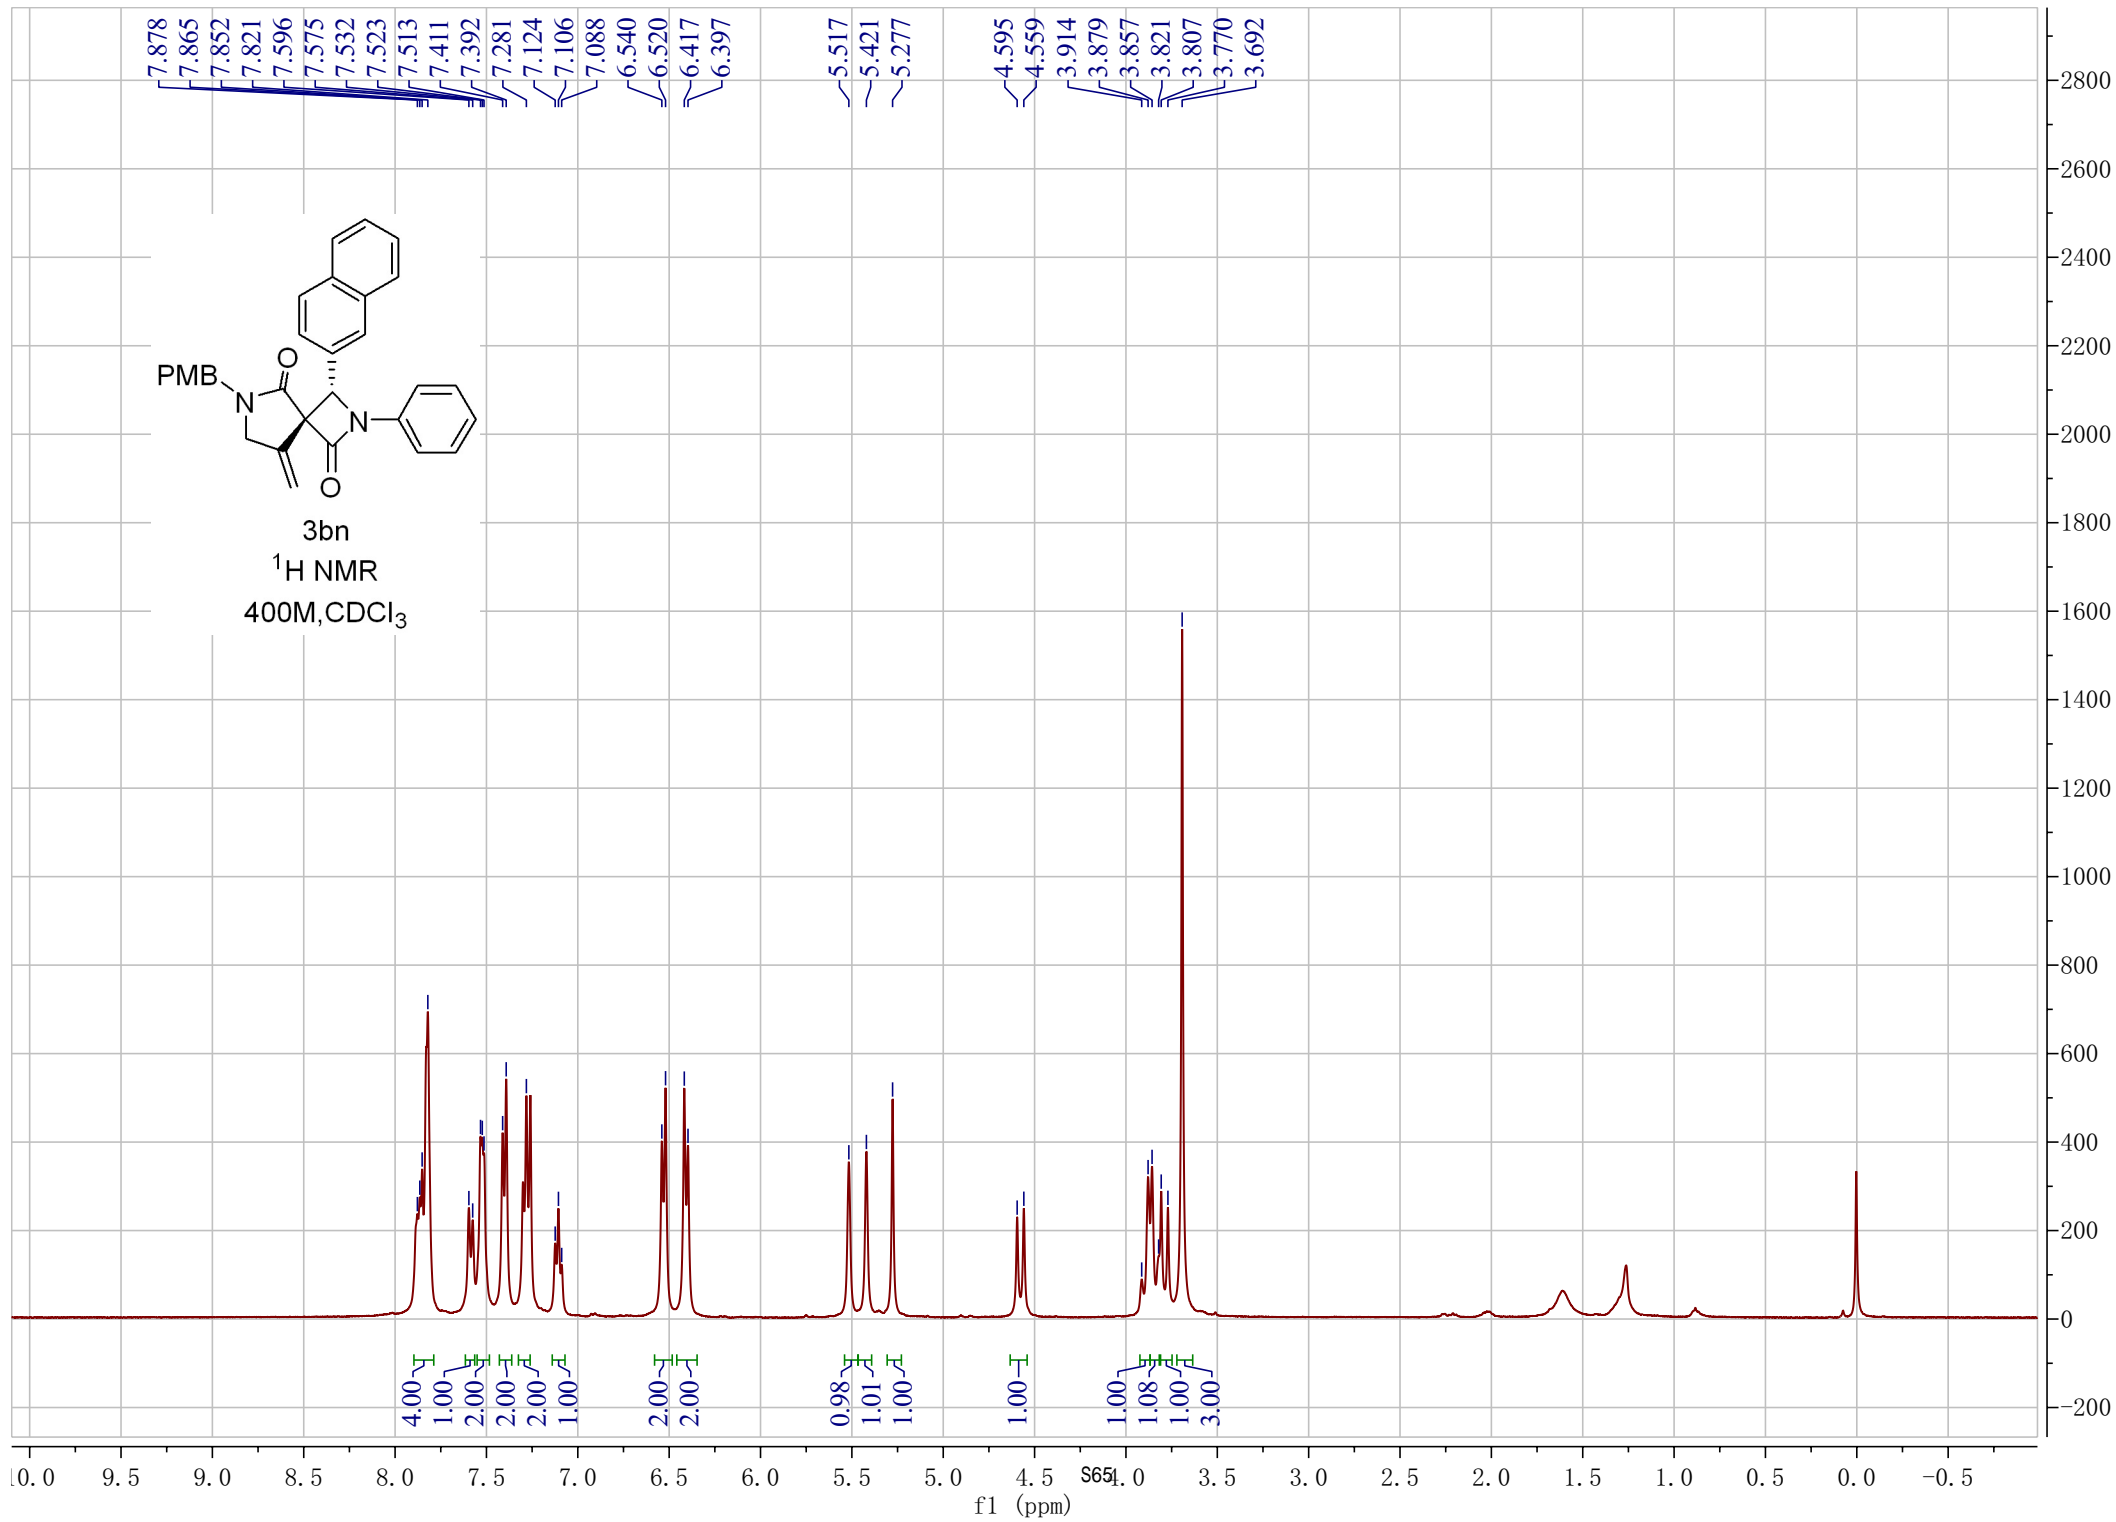

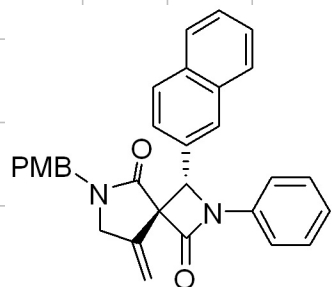

3bn  
 $^{13}\text{C}$ NMR  
100M,  $\text{CDCl}_3$

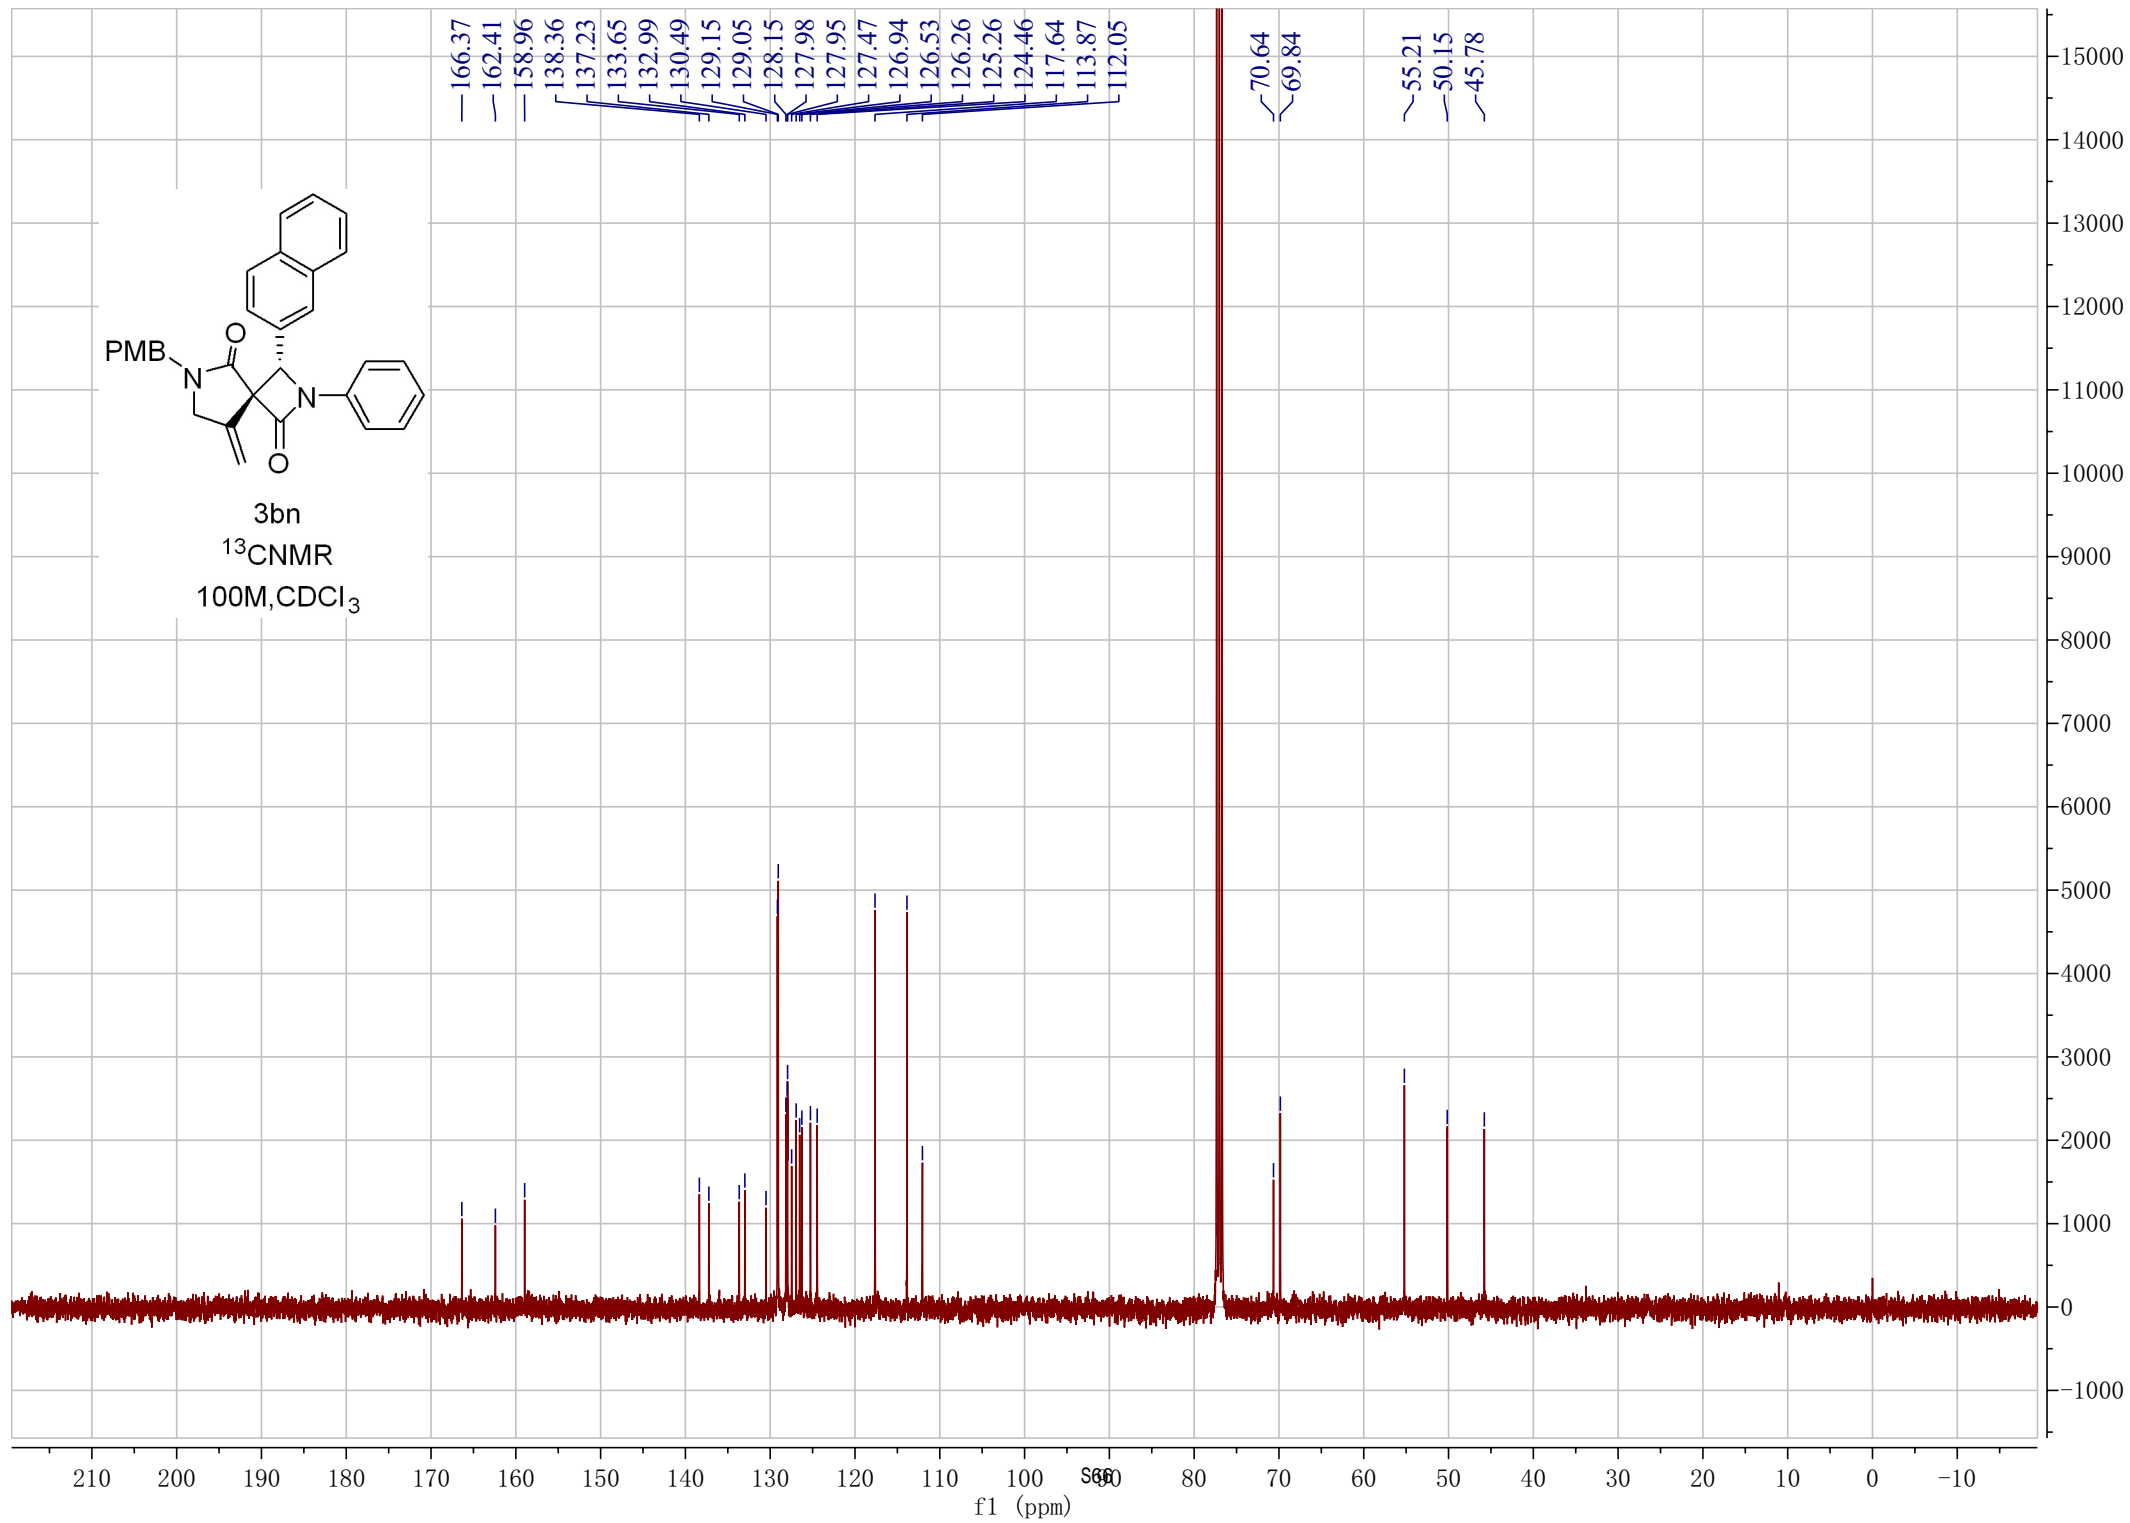

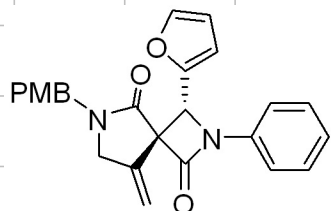

3bo  
<sup>1</sup>H NMR  
400M, CDCl<sub>3</sub>

7.363  
7.304  
7.284  
7.259  
7.241  
7.221  
7.067  
7.049  
7.031  
6.930  
6.909  
6.757  
6.736  
6.465  
6.458  
6.346  
6.339  
5.342  
5.287  
5.056  
4.546  
4.509  
4.098  
4.062  
3.850  
3.806  
3.770  
3.717

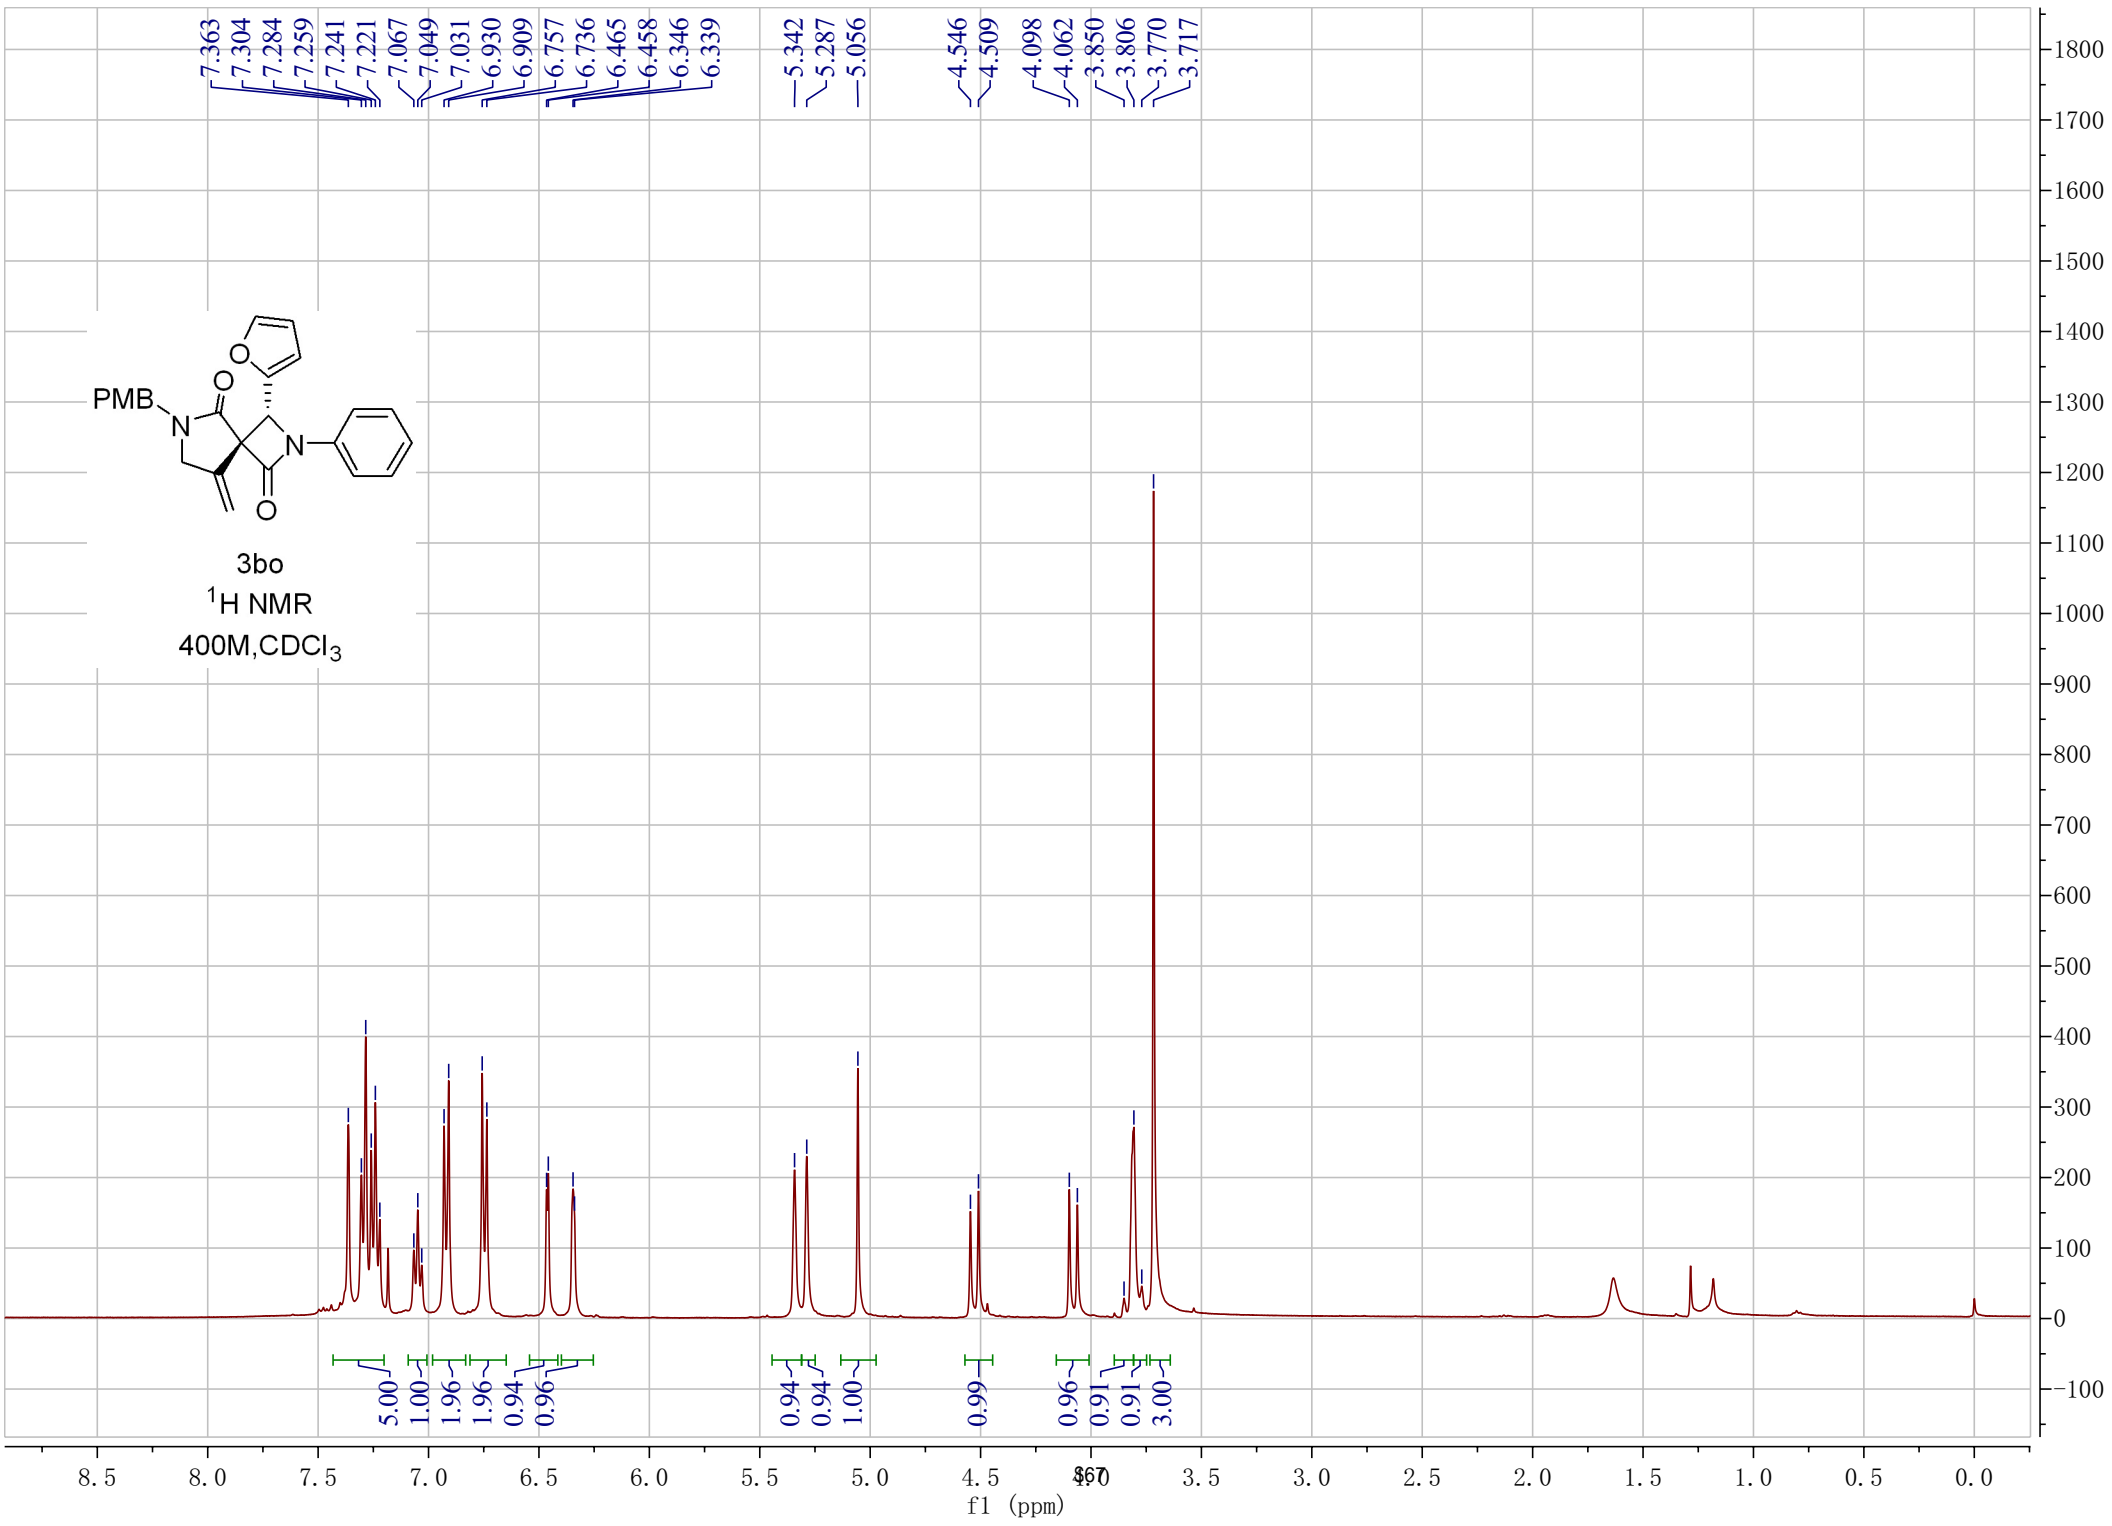

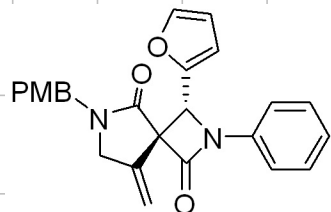

3bo  
<sup>13</sup>CNMR  
100M, CDCl<sub>3</sub>

166.11  
161.91  
159.20  
146.63  
142.69  
137.71  
136.62  
129.39  
129.10  
127.56  
124.62  
117.53  
114.12  
111.97  
111.25  
111.02

69.58  
62.05  
55.31  
49.93  
45.99

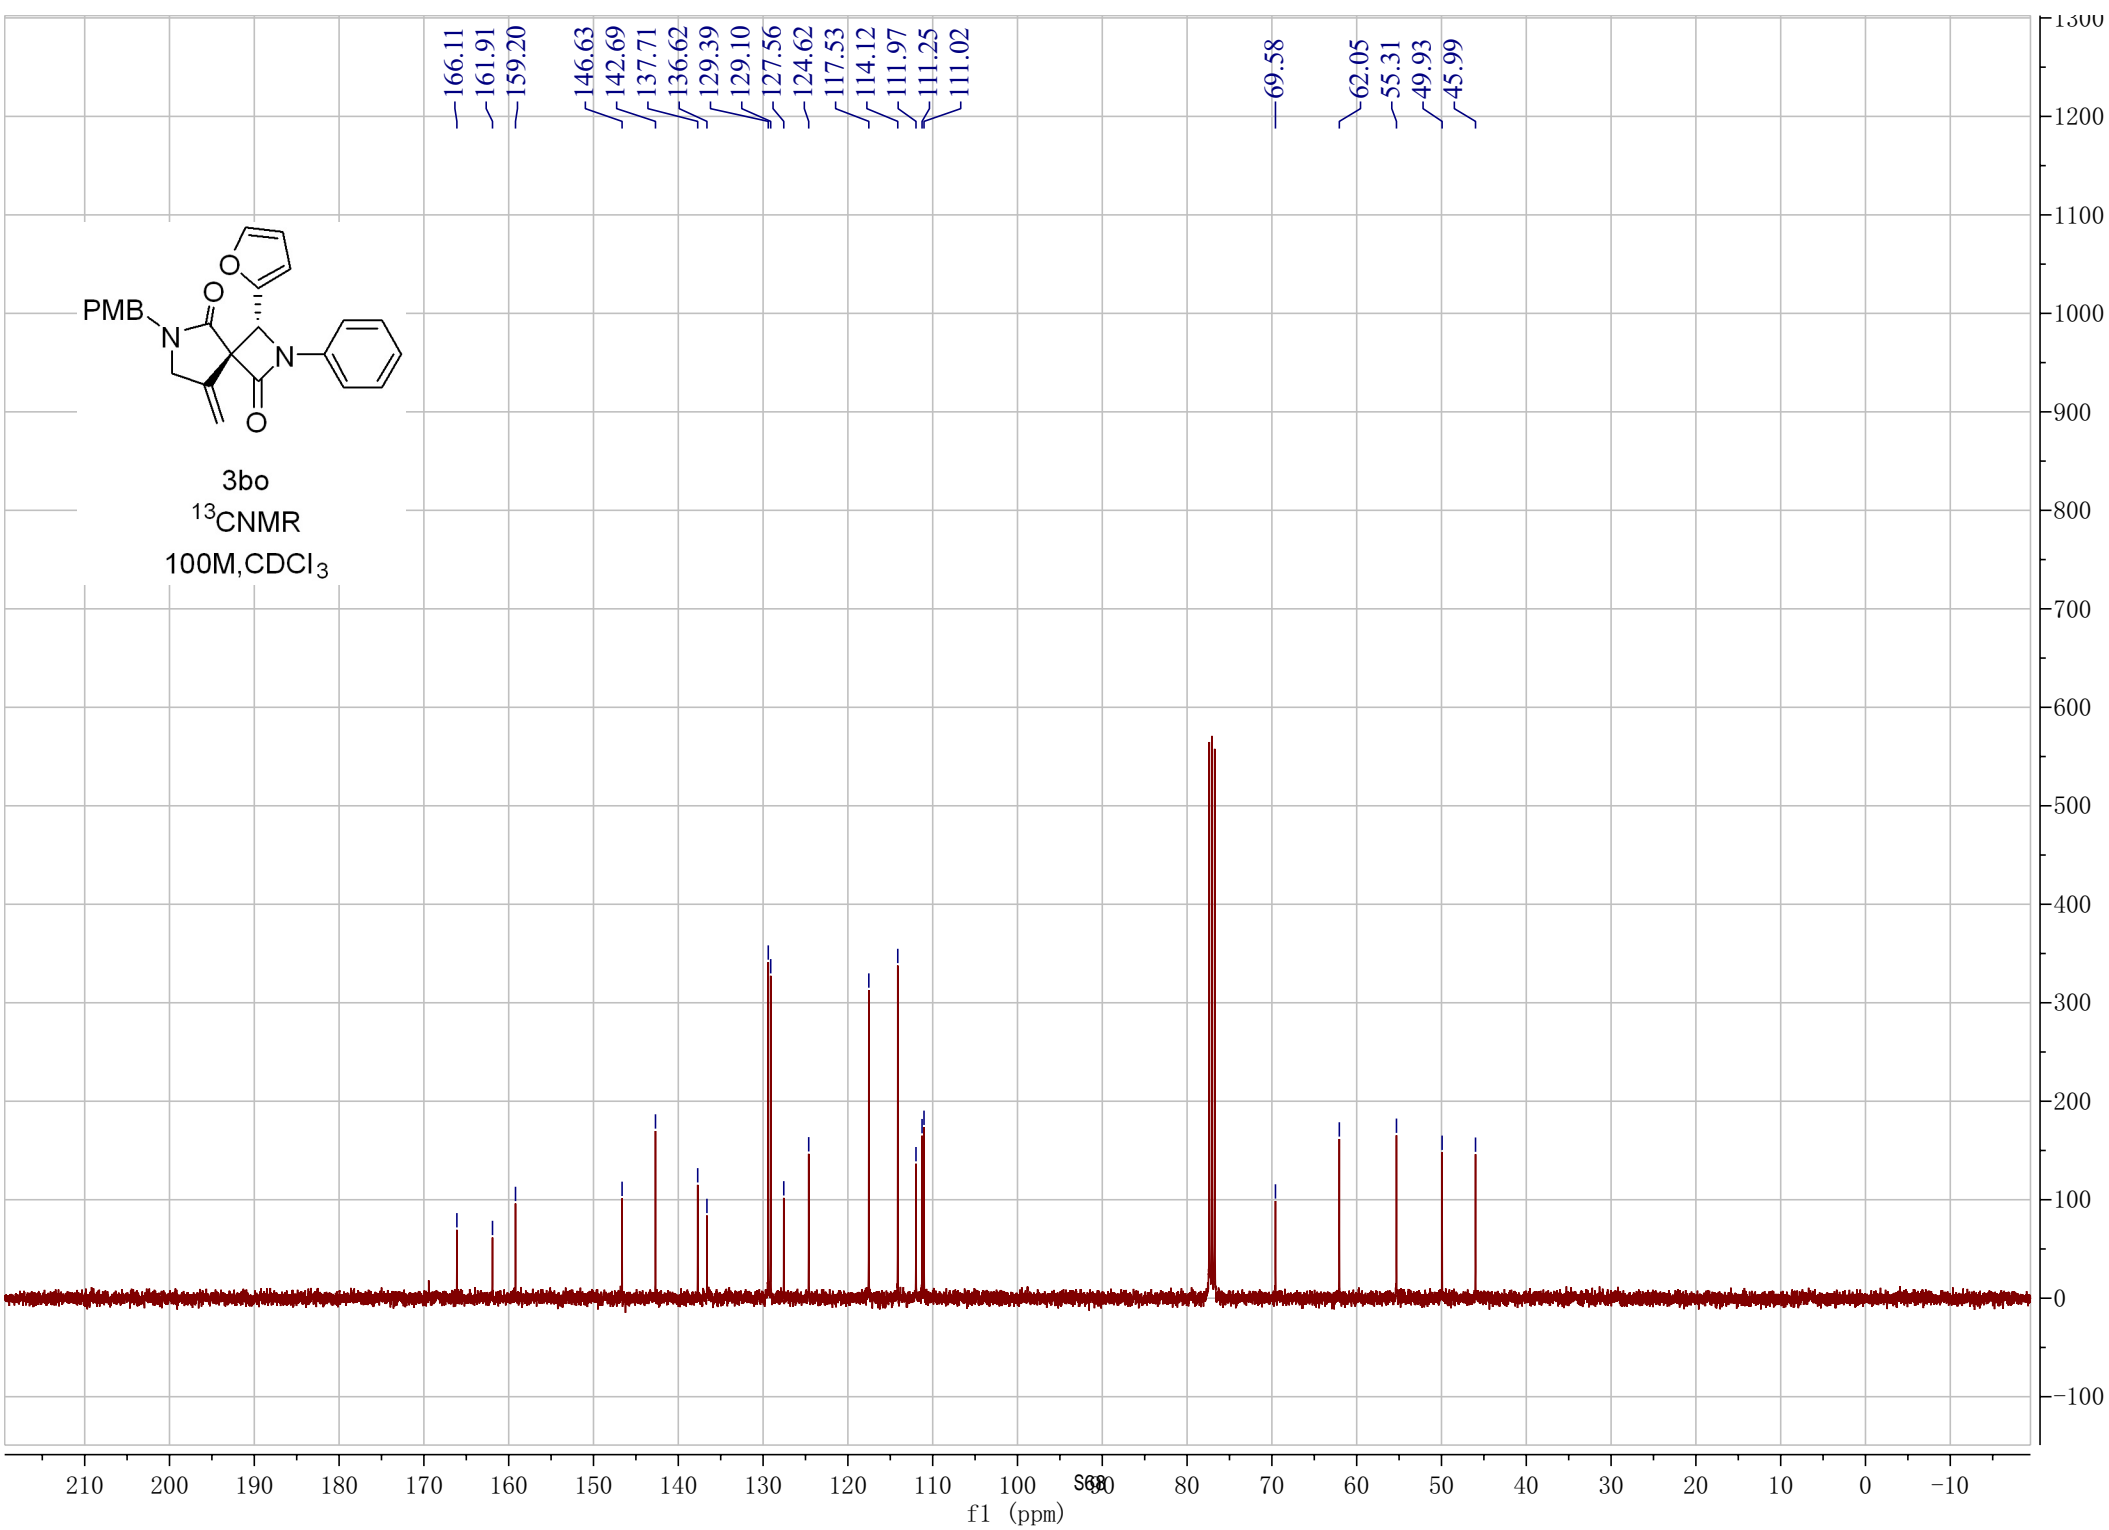

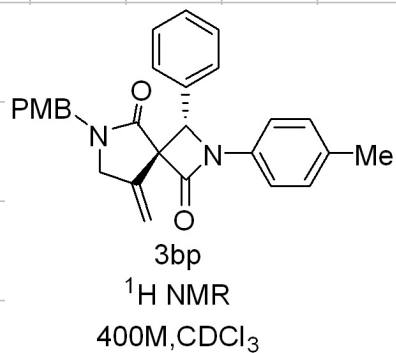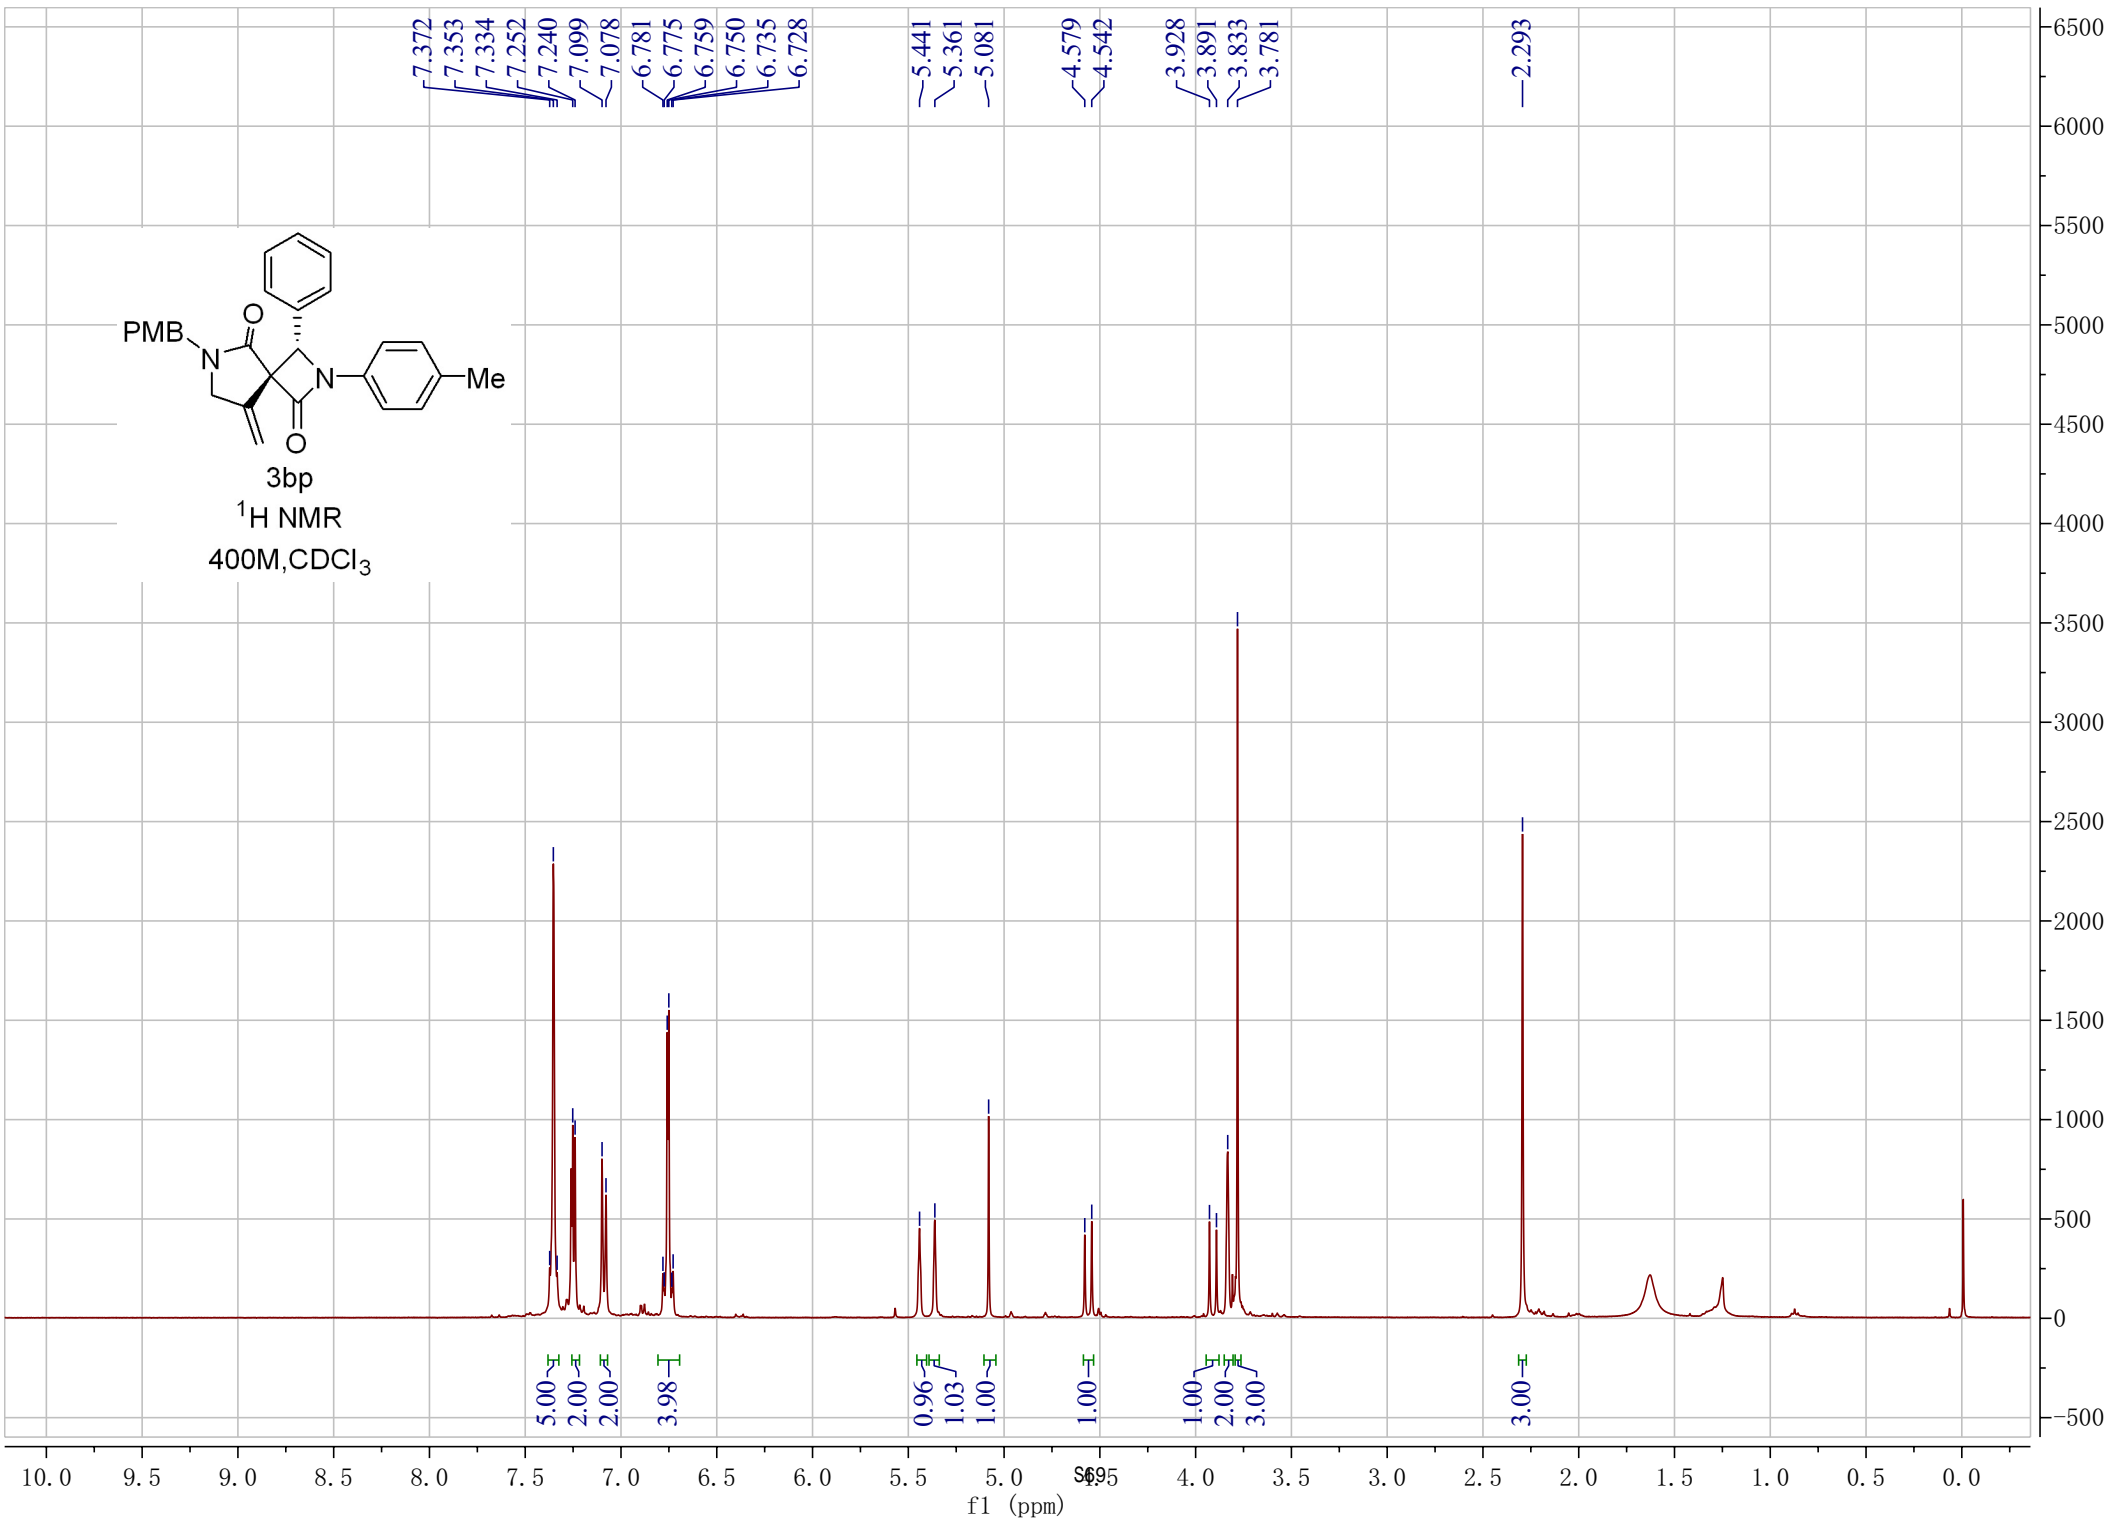

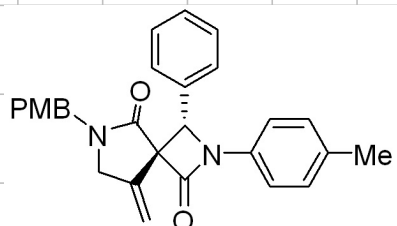

3bp  
<sup>13</sup>CNMR  
100M, CDCl<sub>3</sub>

166.37  
162.12  
159.08  
138.33  
134.63  
134.13  
132.58  
129.61  
129.37  
128.77  
128.27  
127.63  
127.56  
117.59  
114.01  
111.88

70.14  
69.25

55.29  
50.00  
45.83

20.95

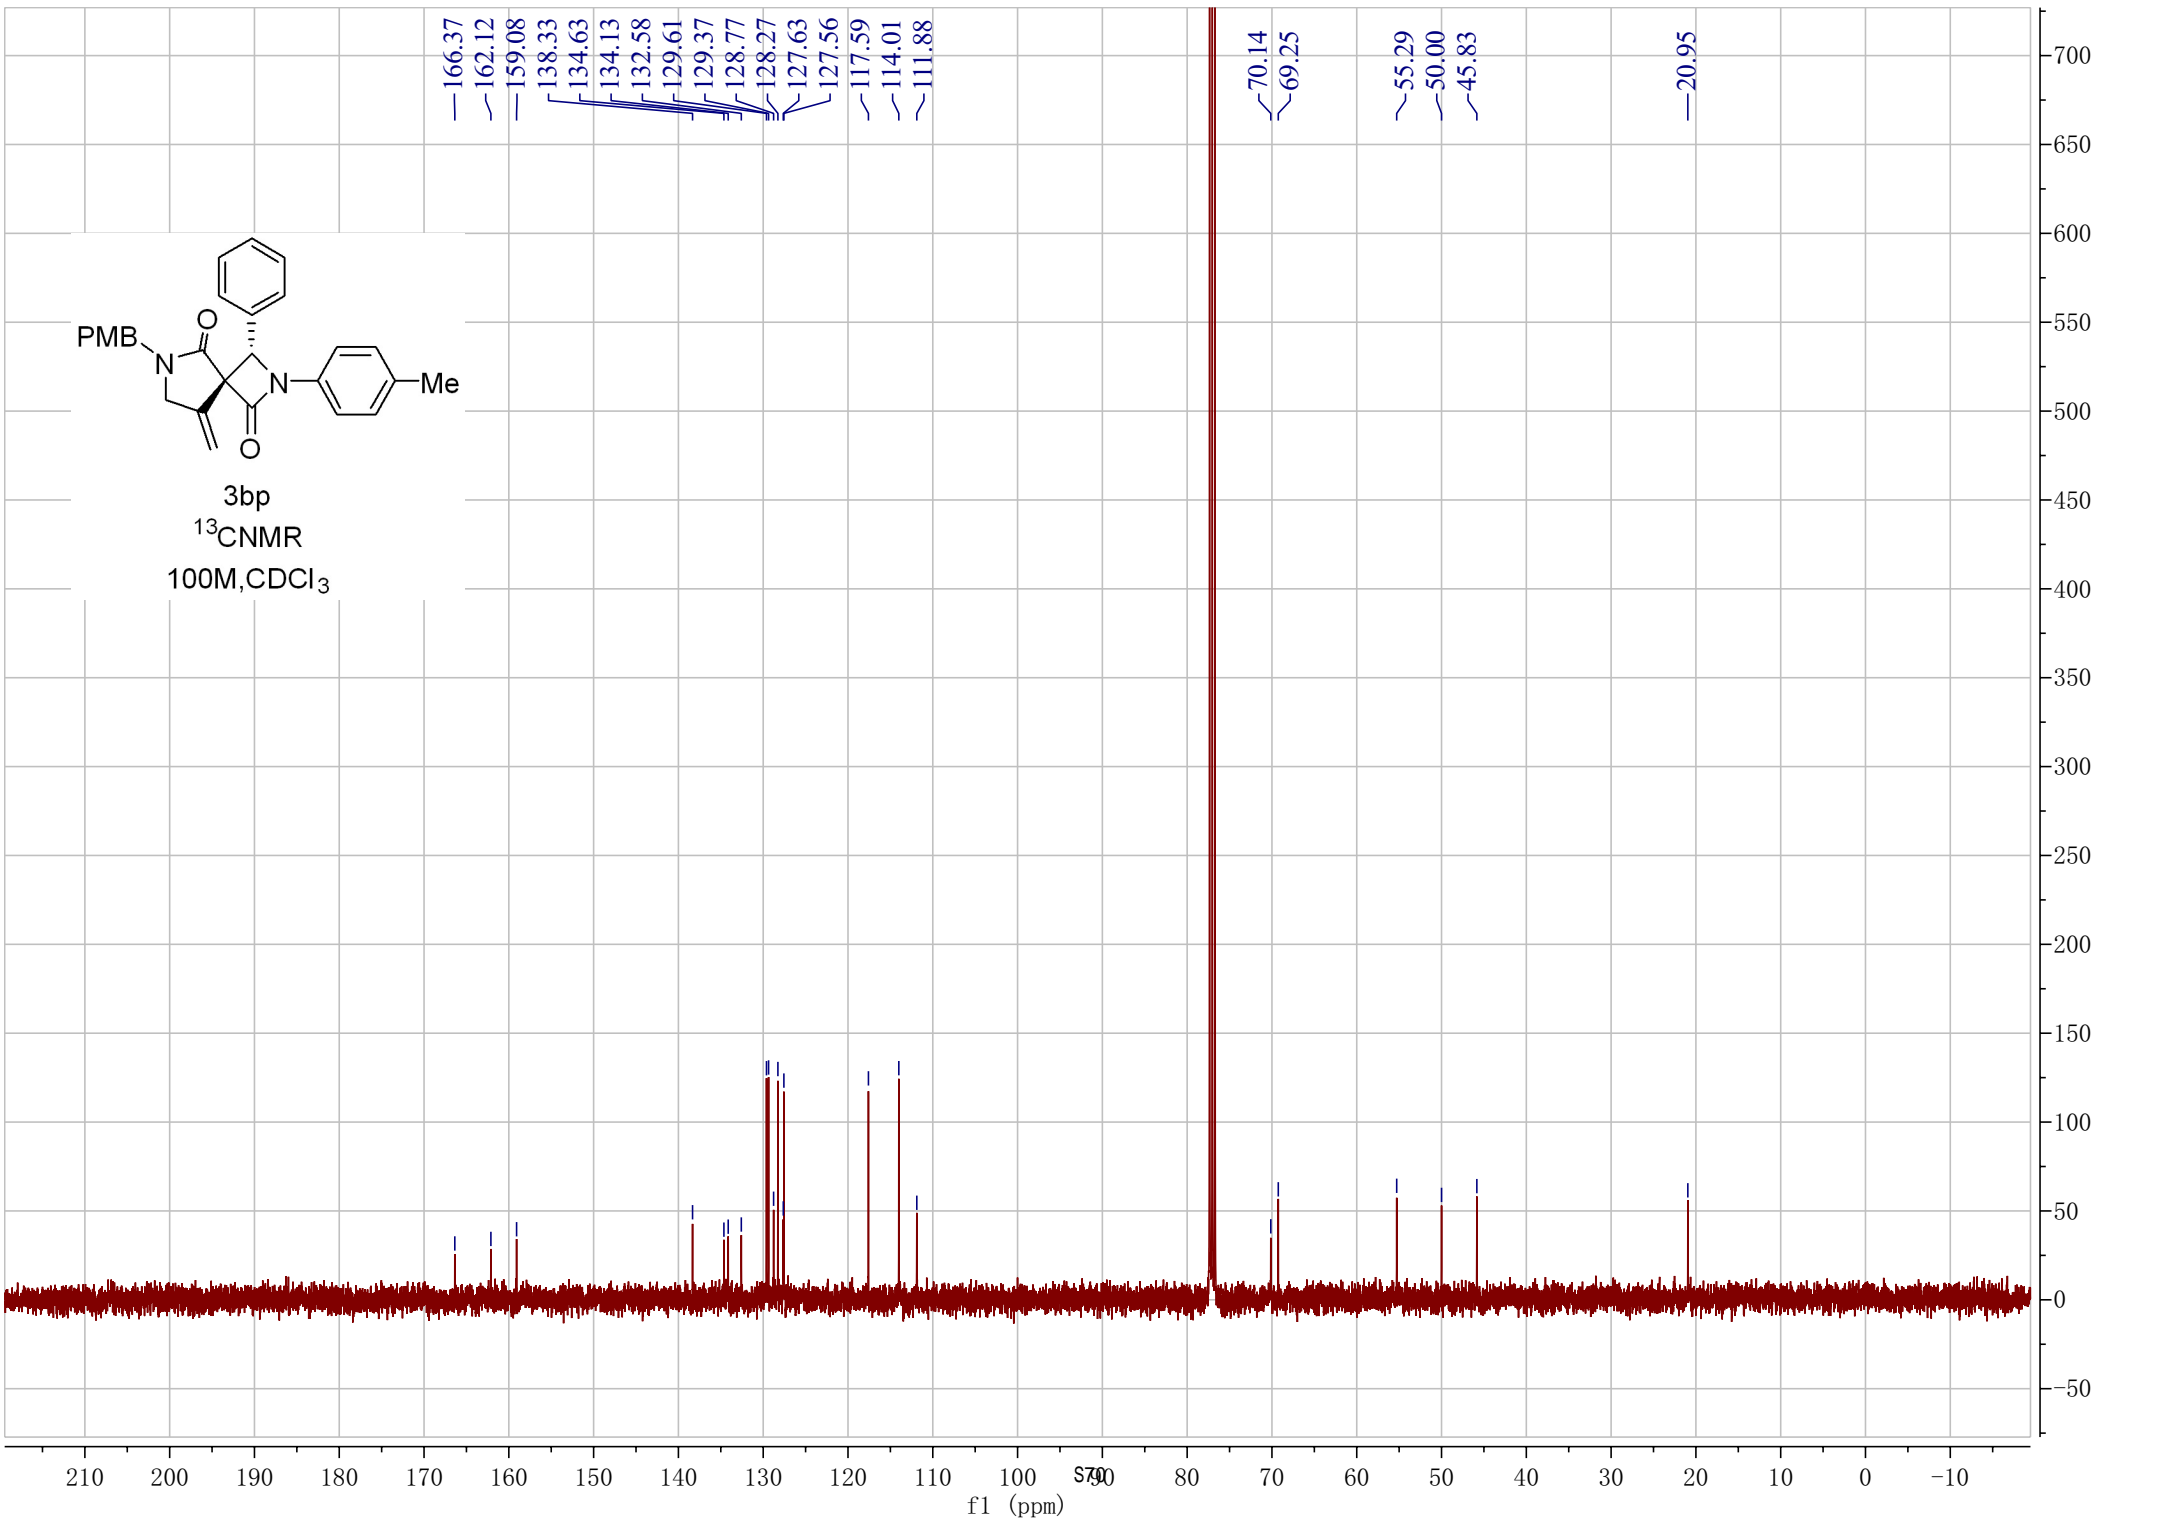

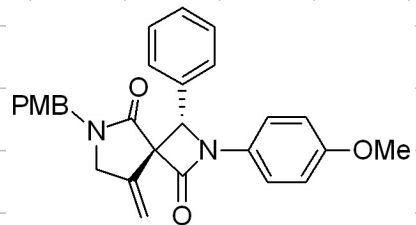

3bq

<sup>1</sup>H NMR  
400M, CDCl<sub>3</sub>

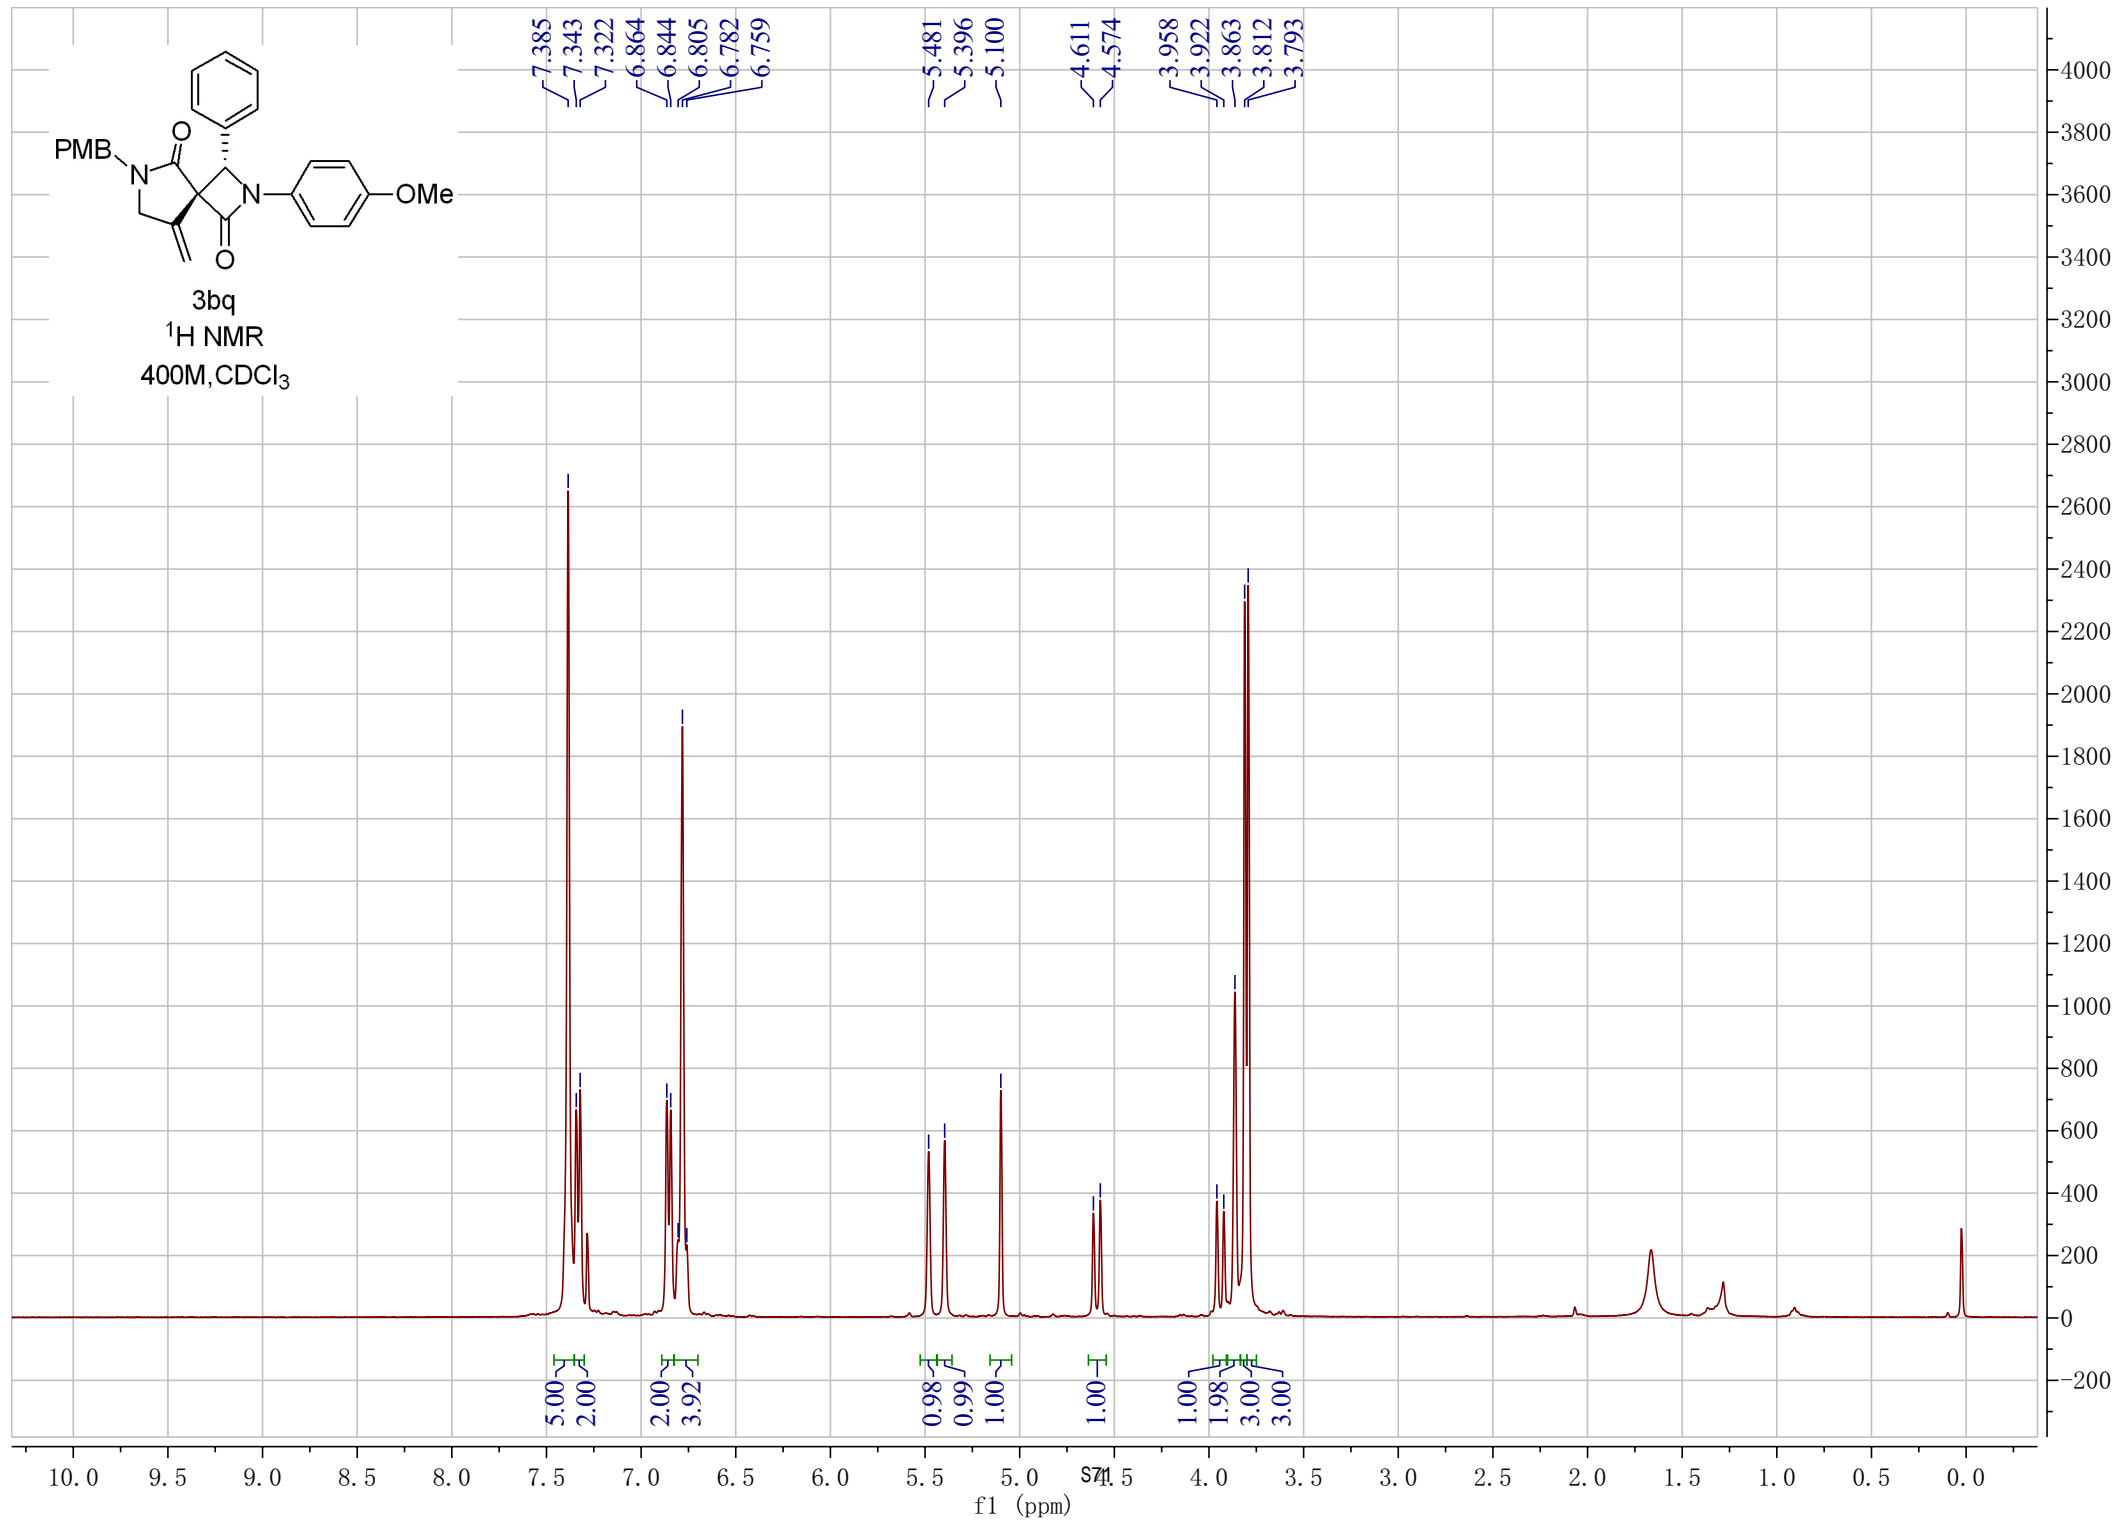

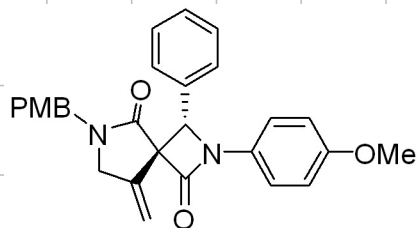

3bq  
 $^{13}\text{C}$ NMR  
100M,  $\text{CDCl}_3$

166.40  
161.84  
159.08  
156.41  
138.32  
132.57  
130.60  
129.36  
128.80  
128.27  
127.62  
118.98  
114.36  
114.00  
111.88

70.19  
69.38  
55.49  
55.29  
49.99  
45.83

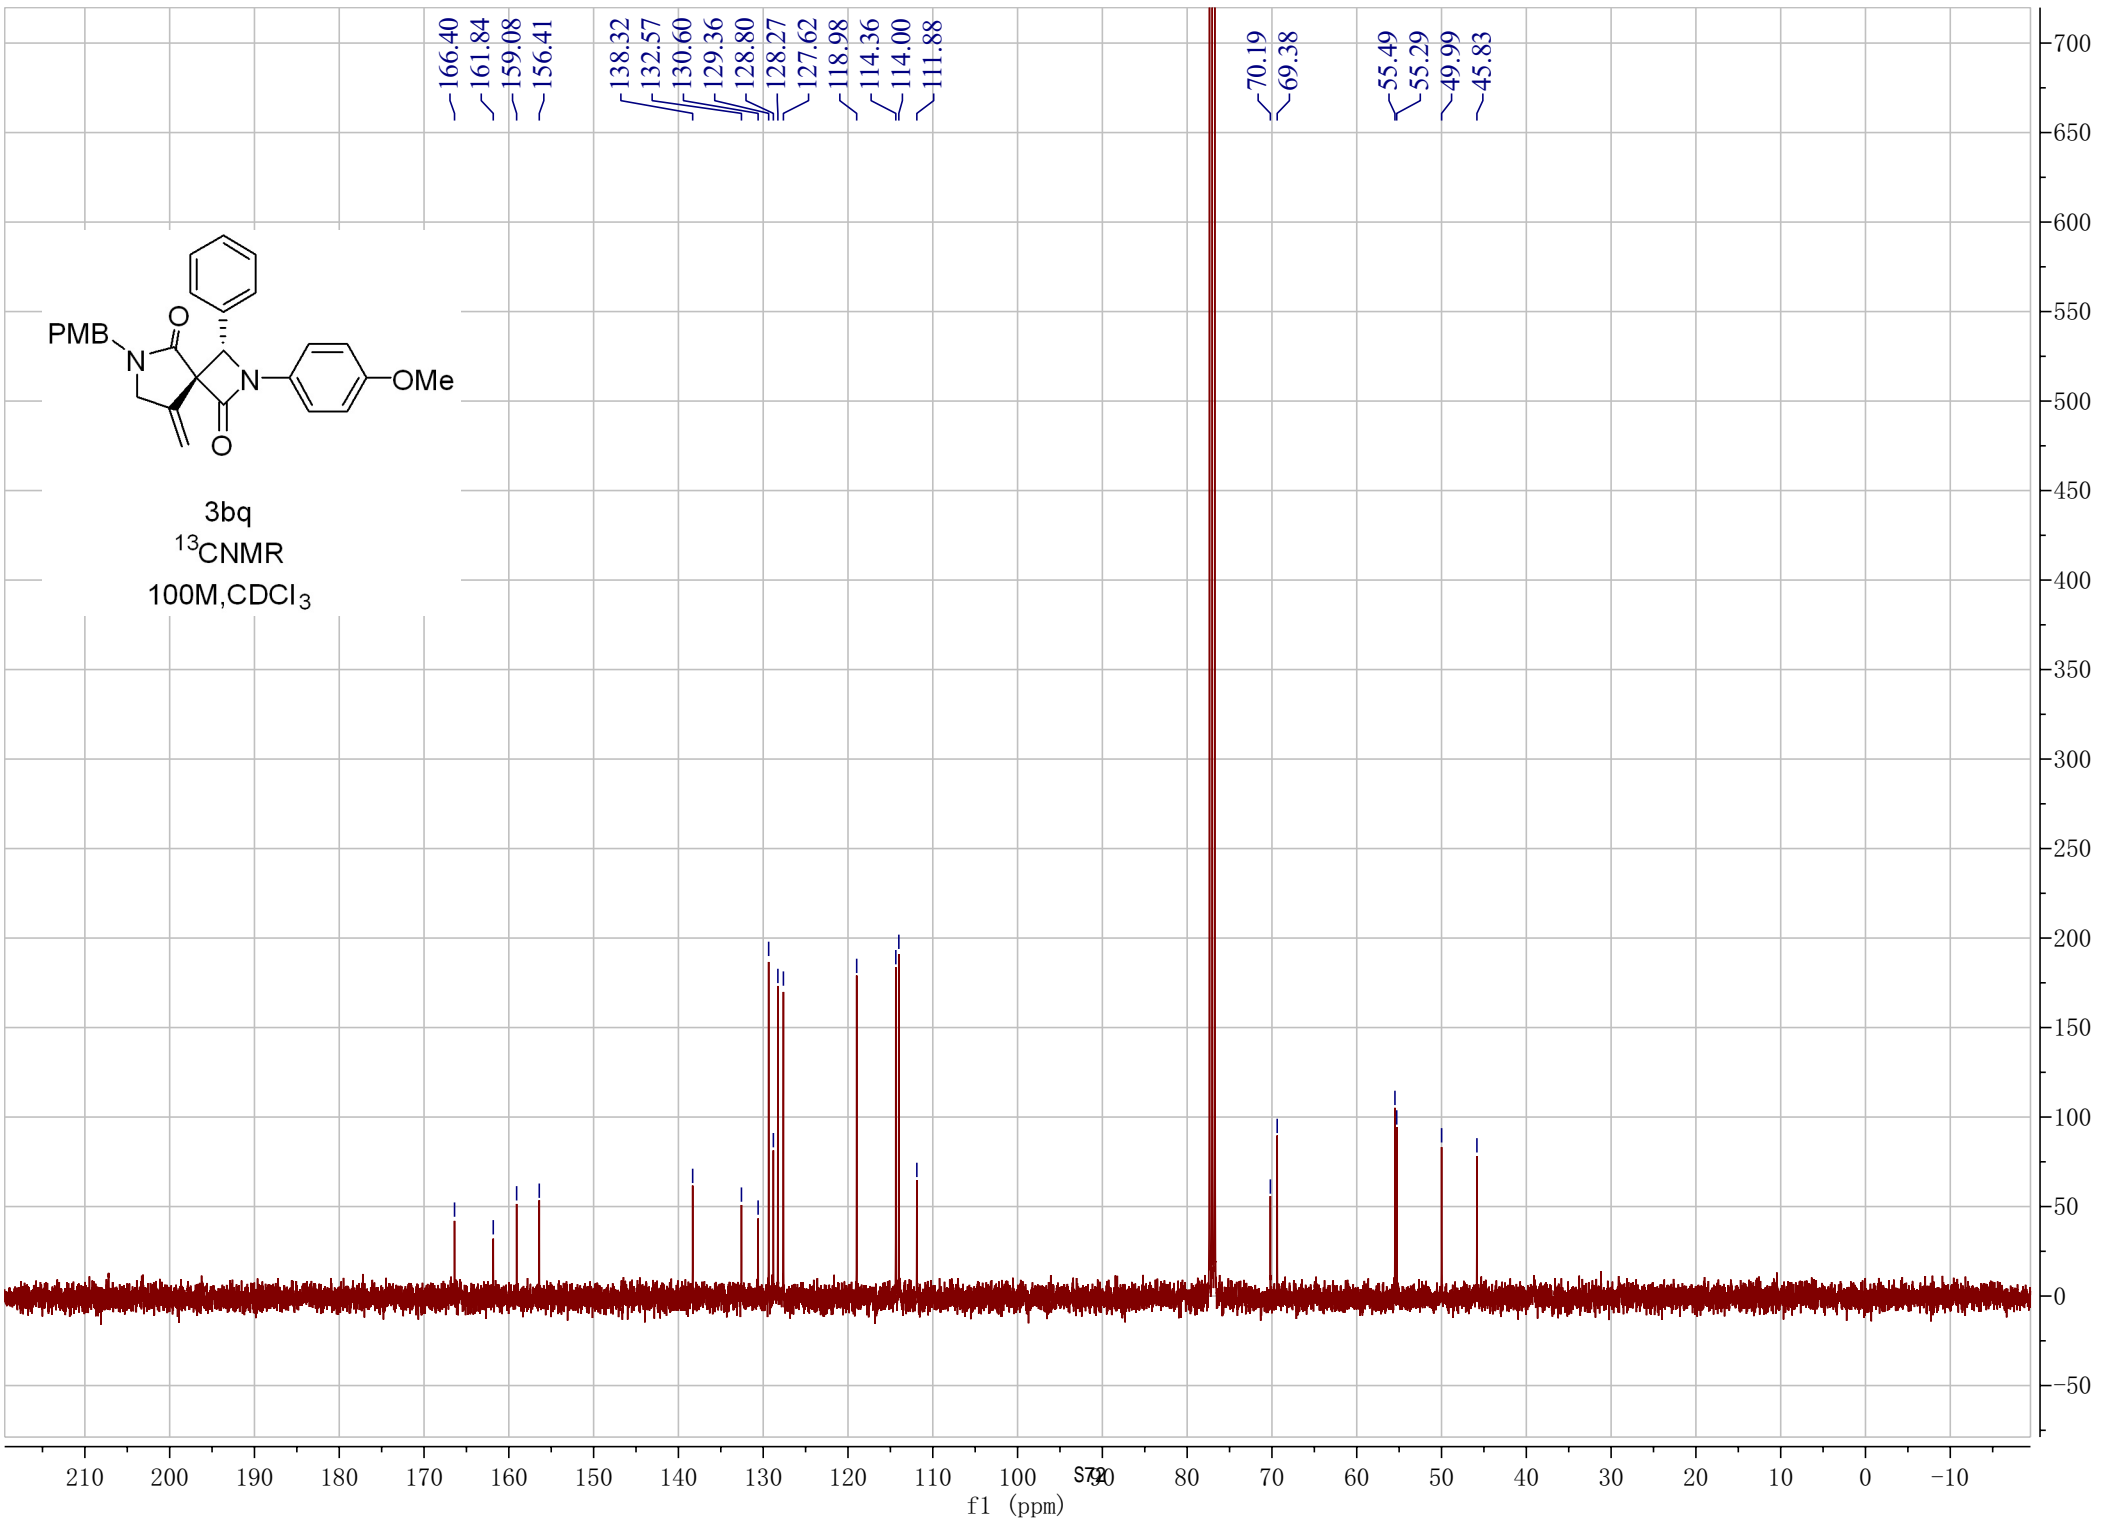



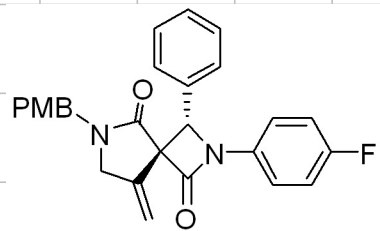

3br  
<sup>1</sup>H NMR  
 400M, CDCl<sub>3</sub>

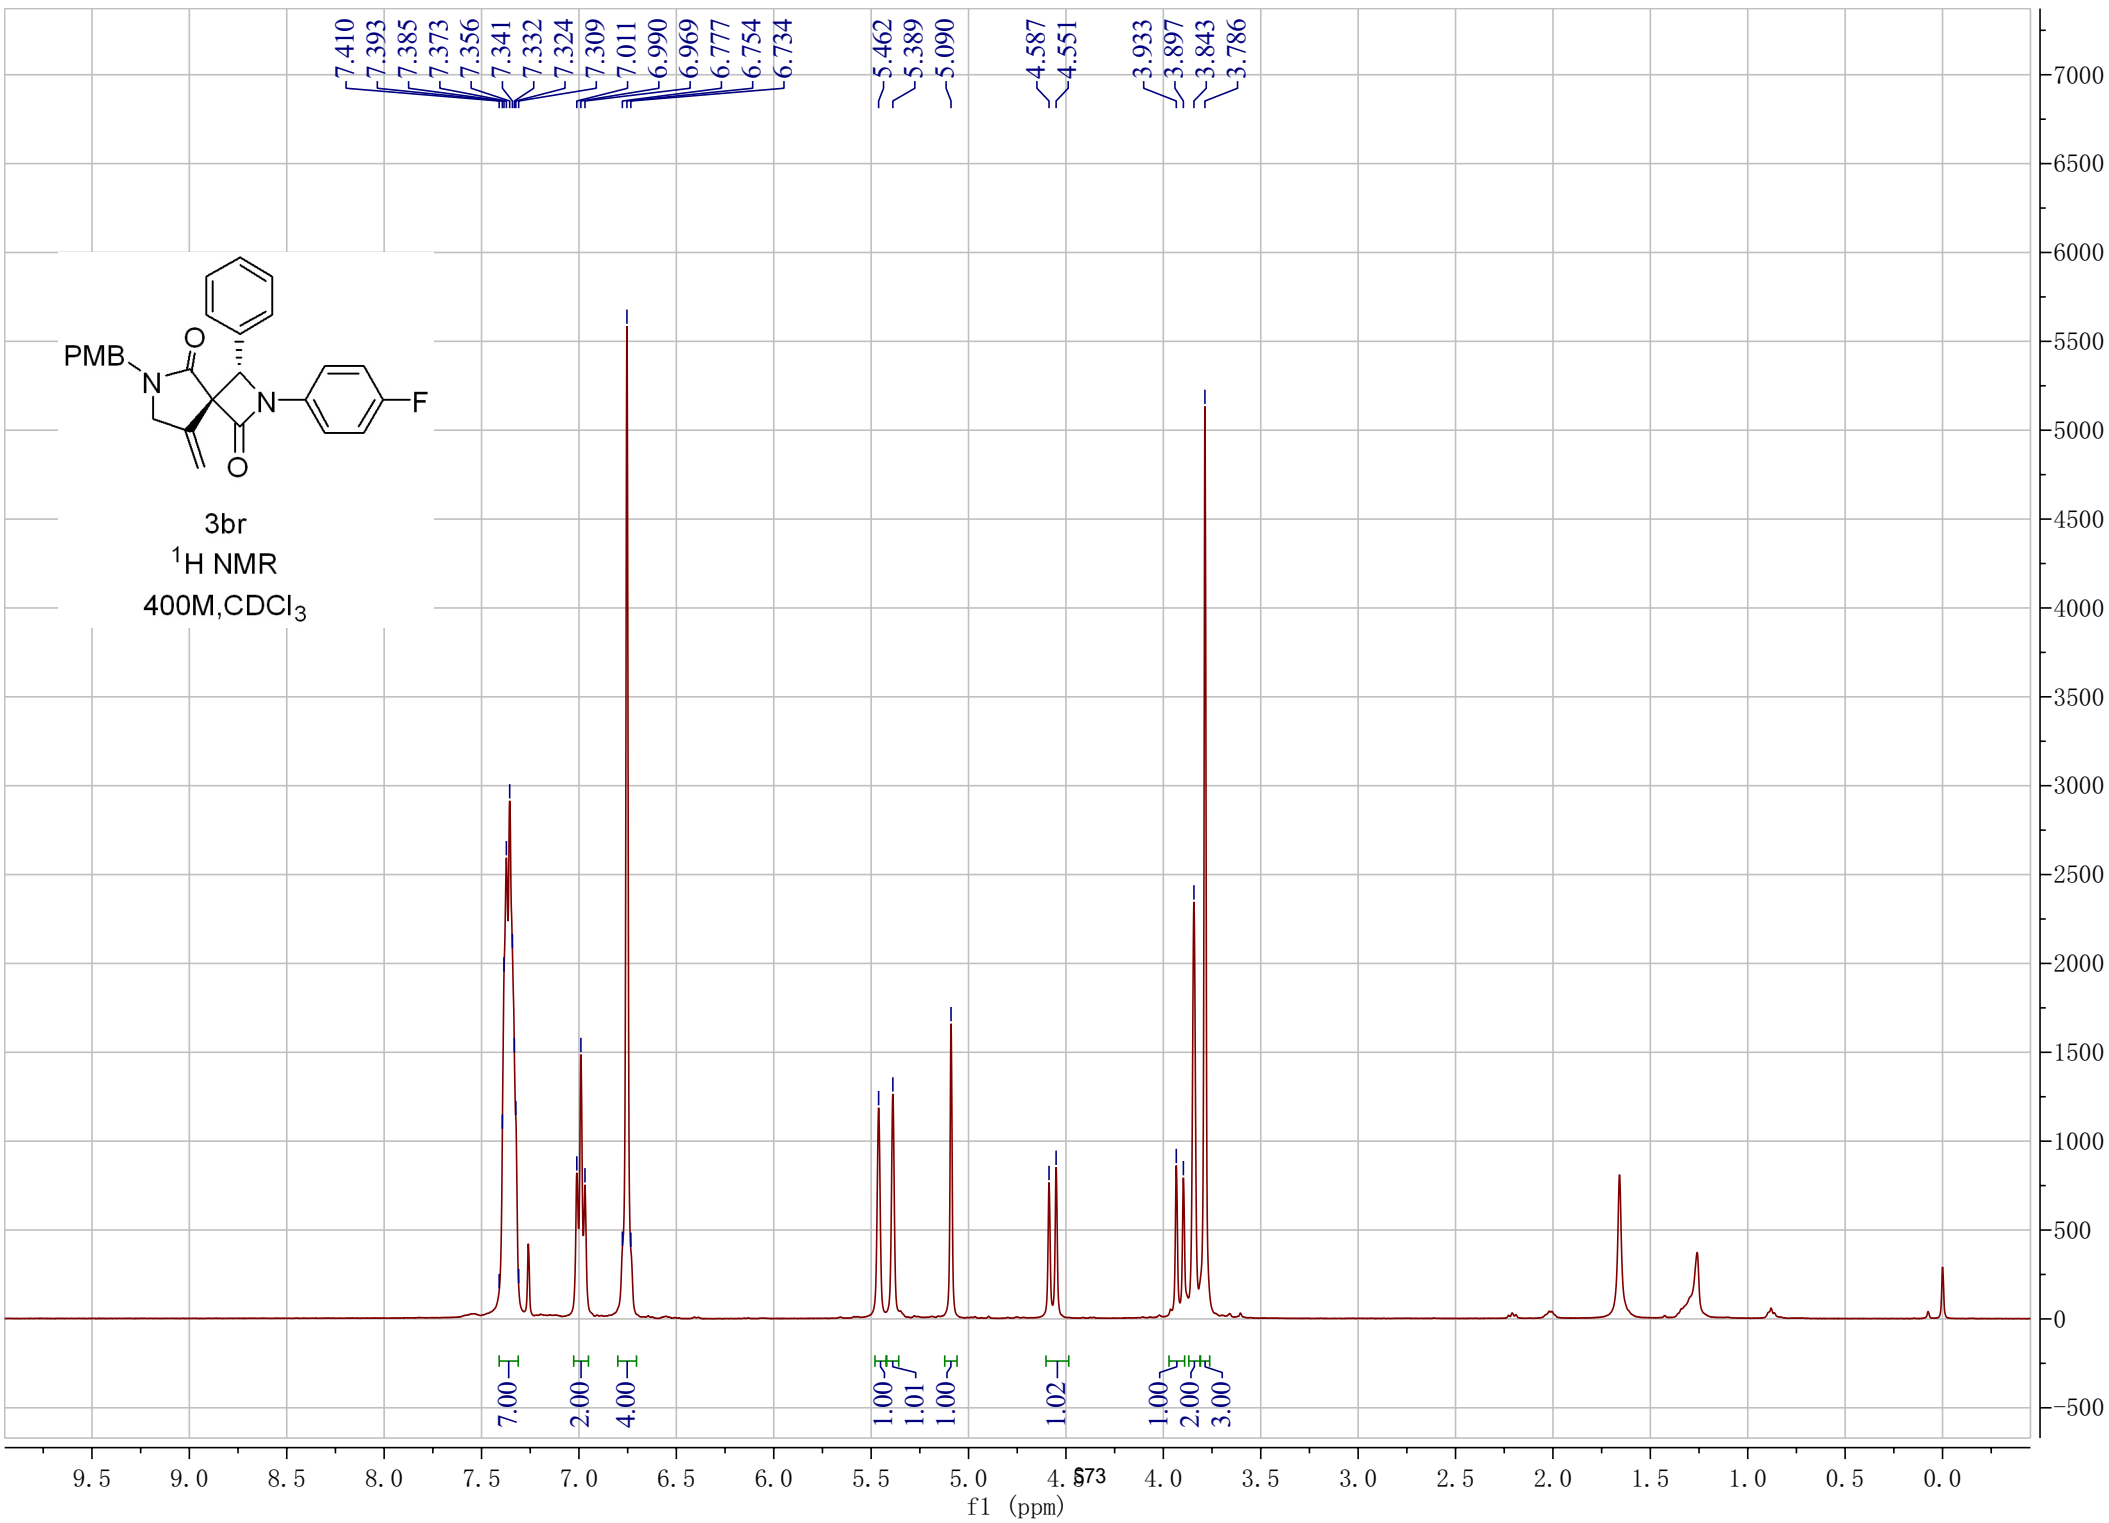

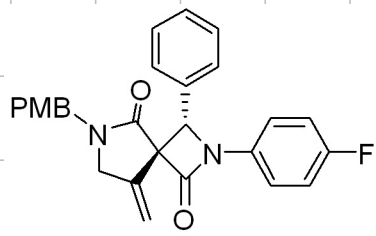

3br

<sup>13</sup>CNMR  
100M, CDCl<sub>3</sub>

- 166.19
- 162.18
- 160.57
- 159.11
- 158.15
- 138.14
- 133.27
- 132.14
- 129.35
- 128.97
- 128.37
- 127.58
- 127.17
- 119.09
- 116.08
- 115.85
- 114.02
- 112.09

- 70.40
- 69.54

- 55.29
- 49.99
- 45.85

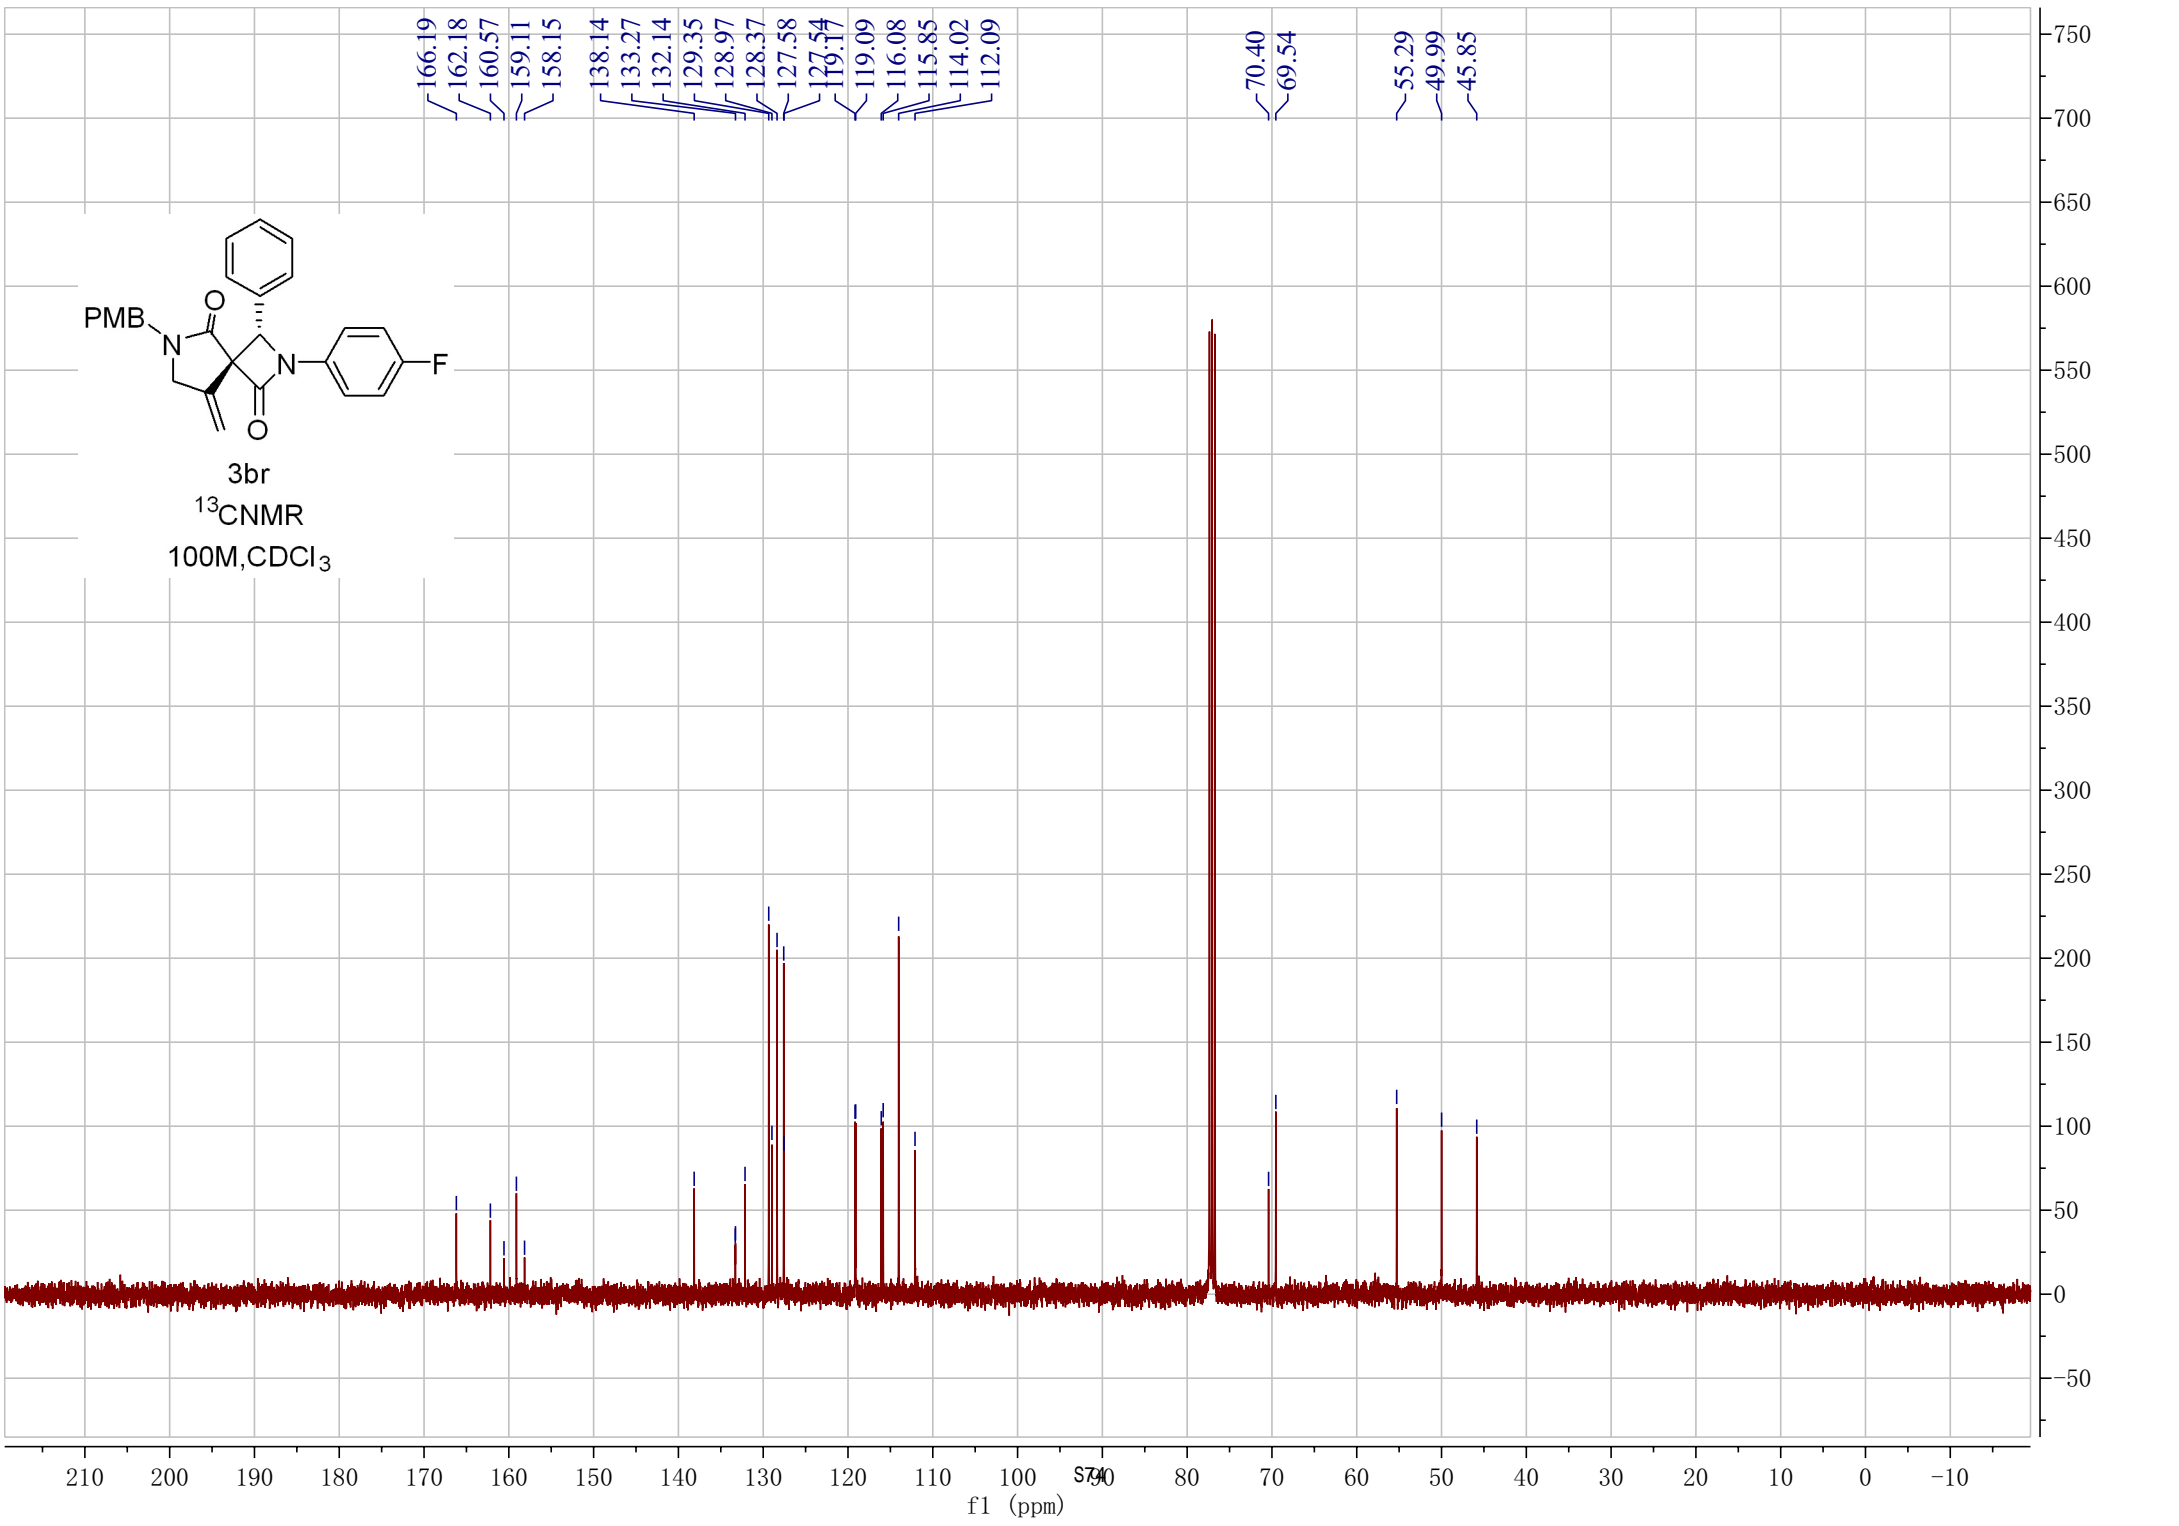

f1 (ppm)

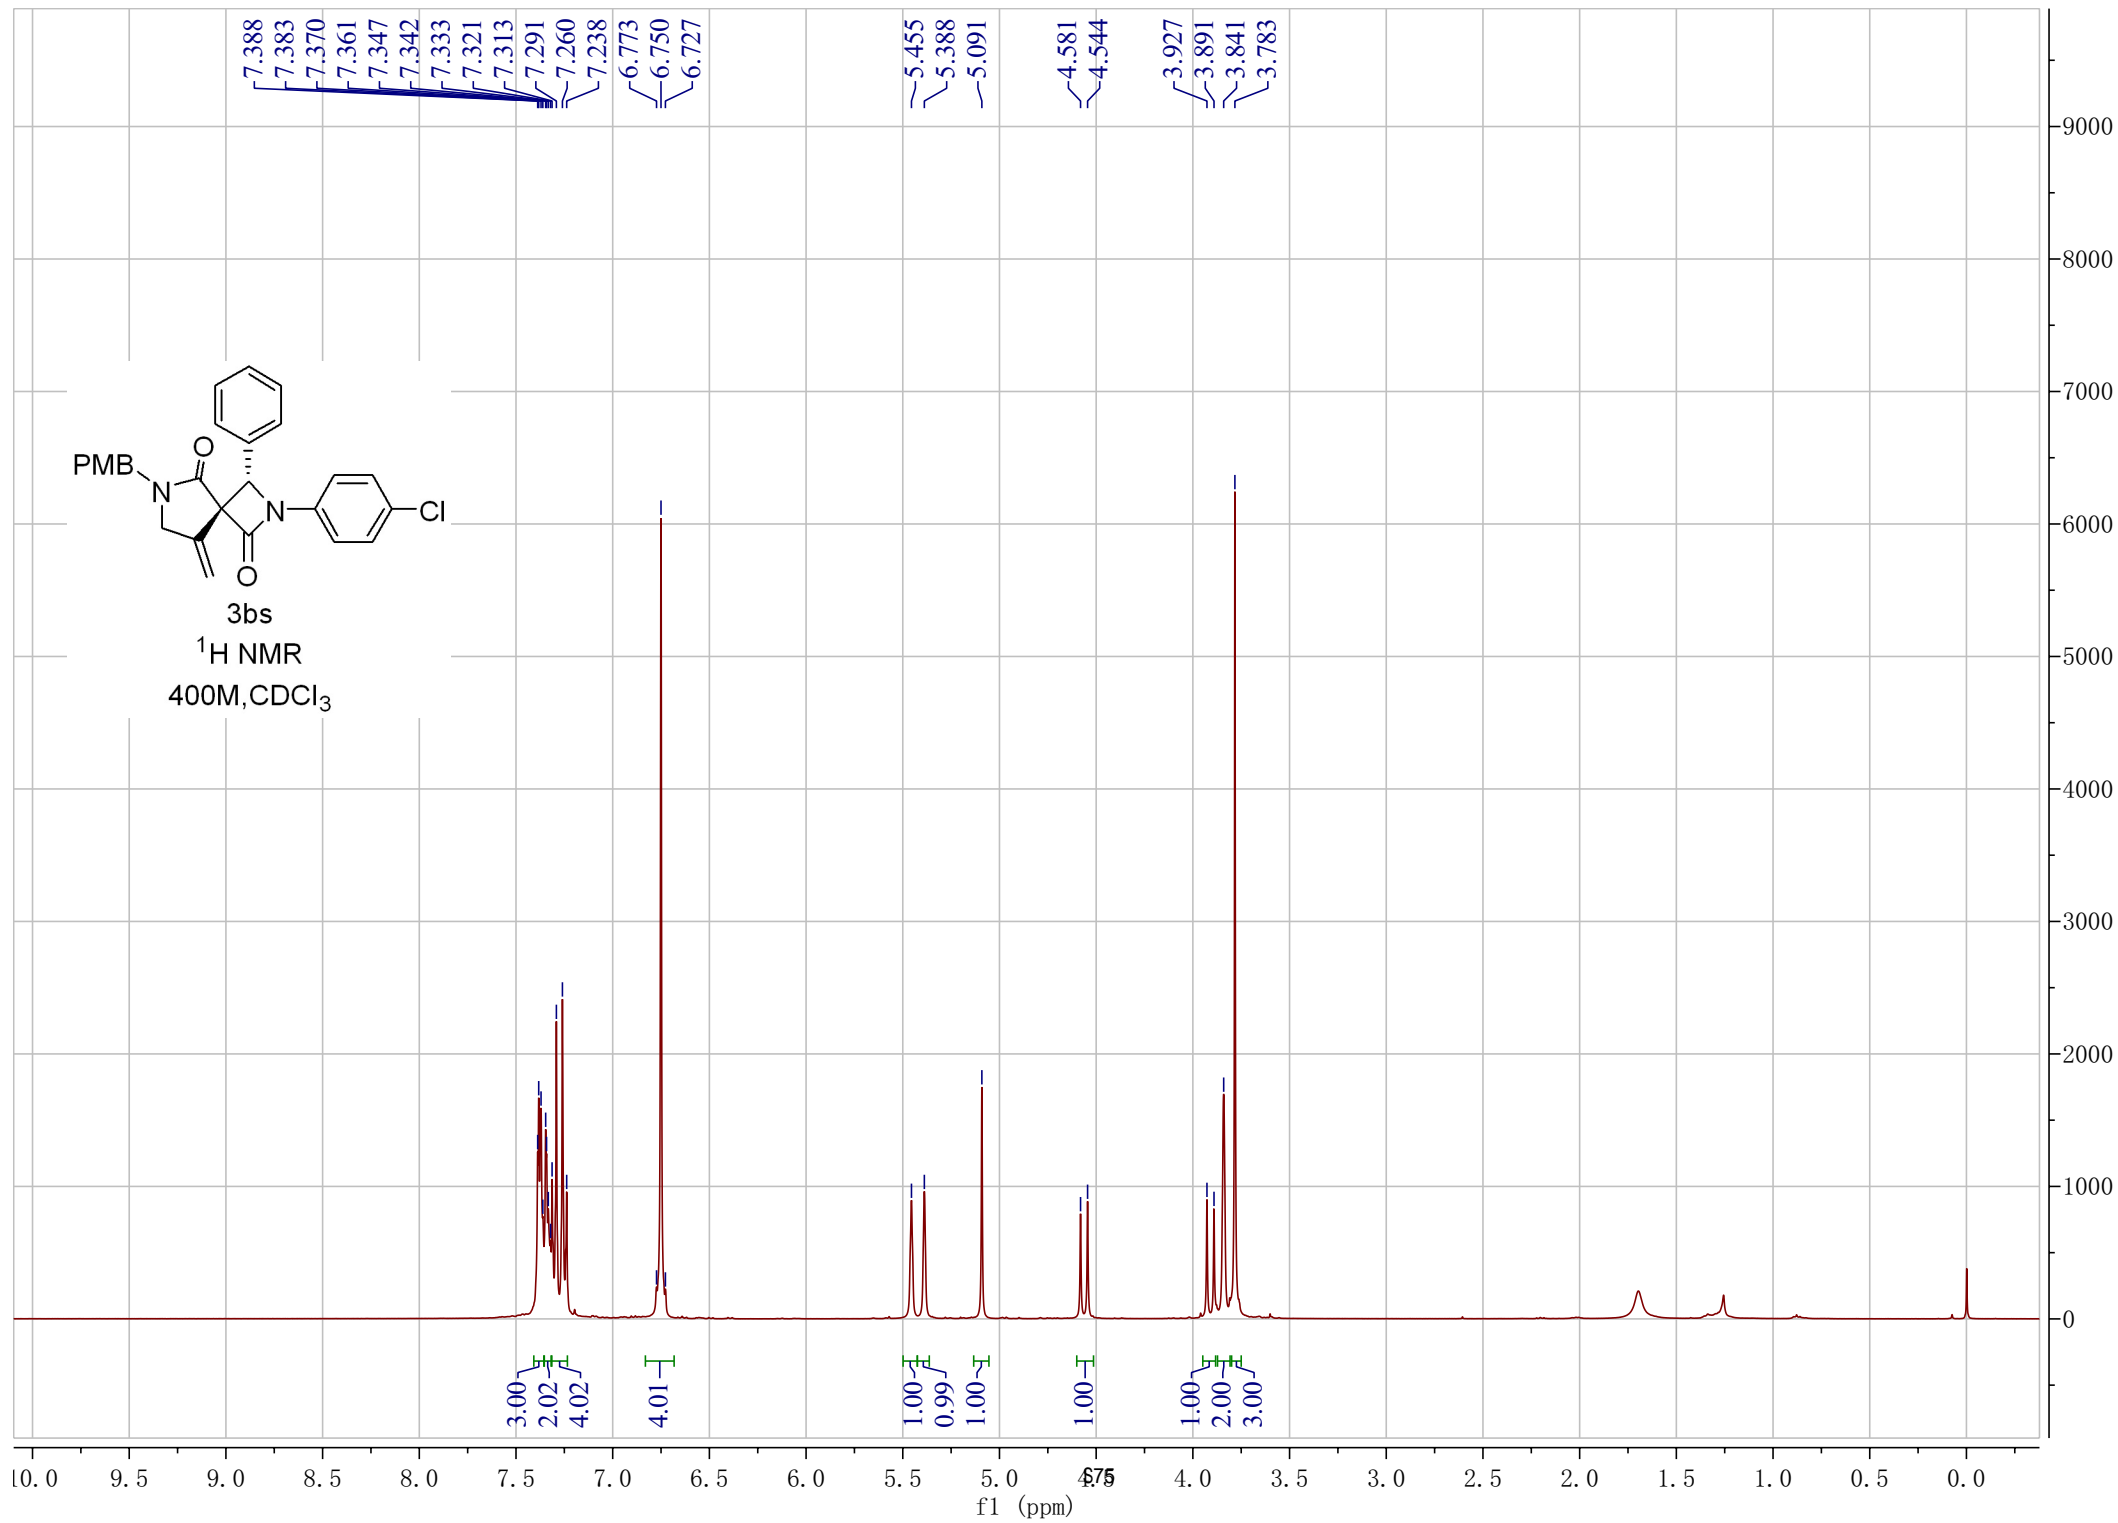

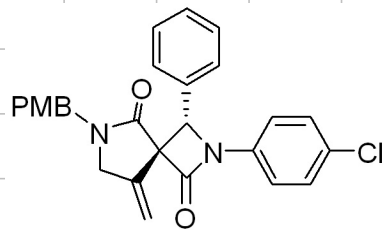

3bs

$^{13}\text{C}$ NMR

100M,  $\text{CDCl}_3$

166.11  
162.34  
159.12  
138.08  
135.54  
132.00  
129.61  
129.35  
129.24  
129.02  
128.40  
127.54  
127.50  
118.89  
114.03  
112.18

70.46  
69.48

55.29  
50.00  
45.86

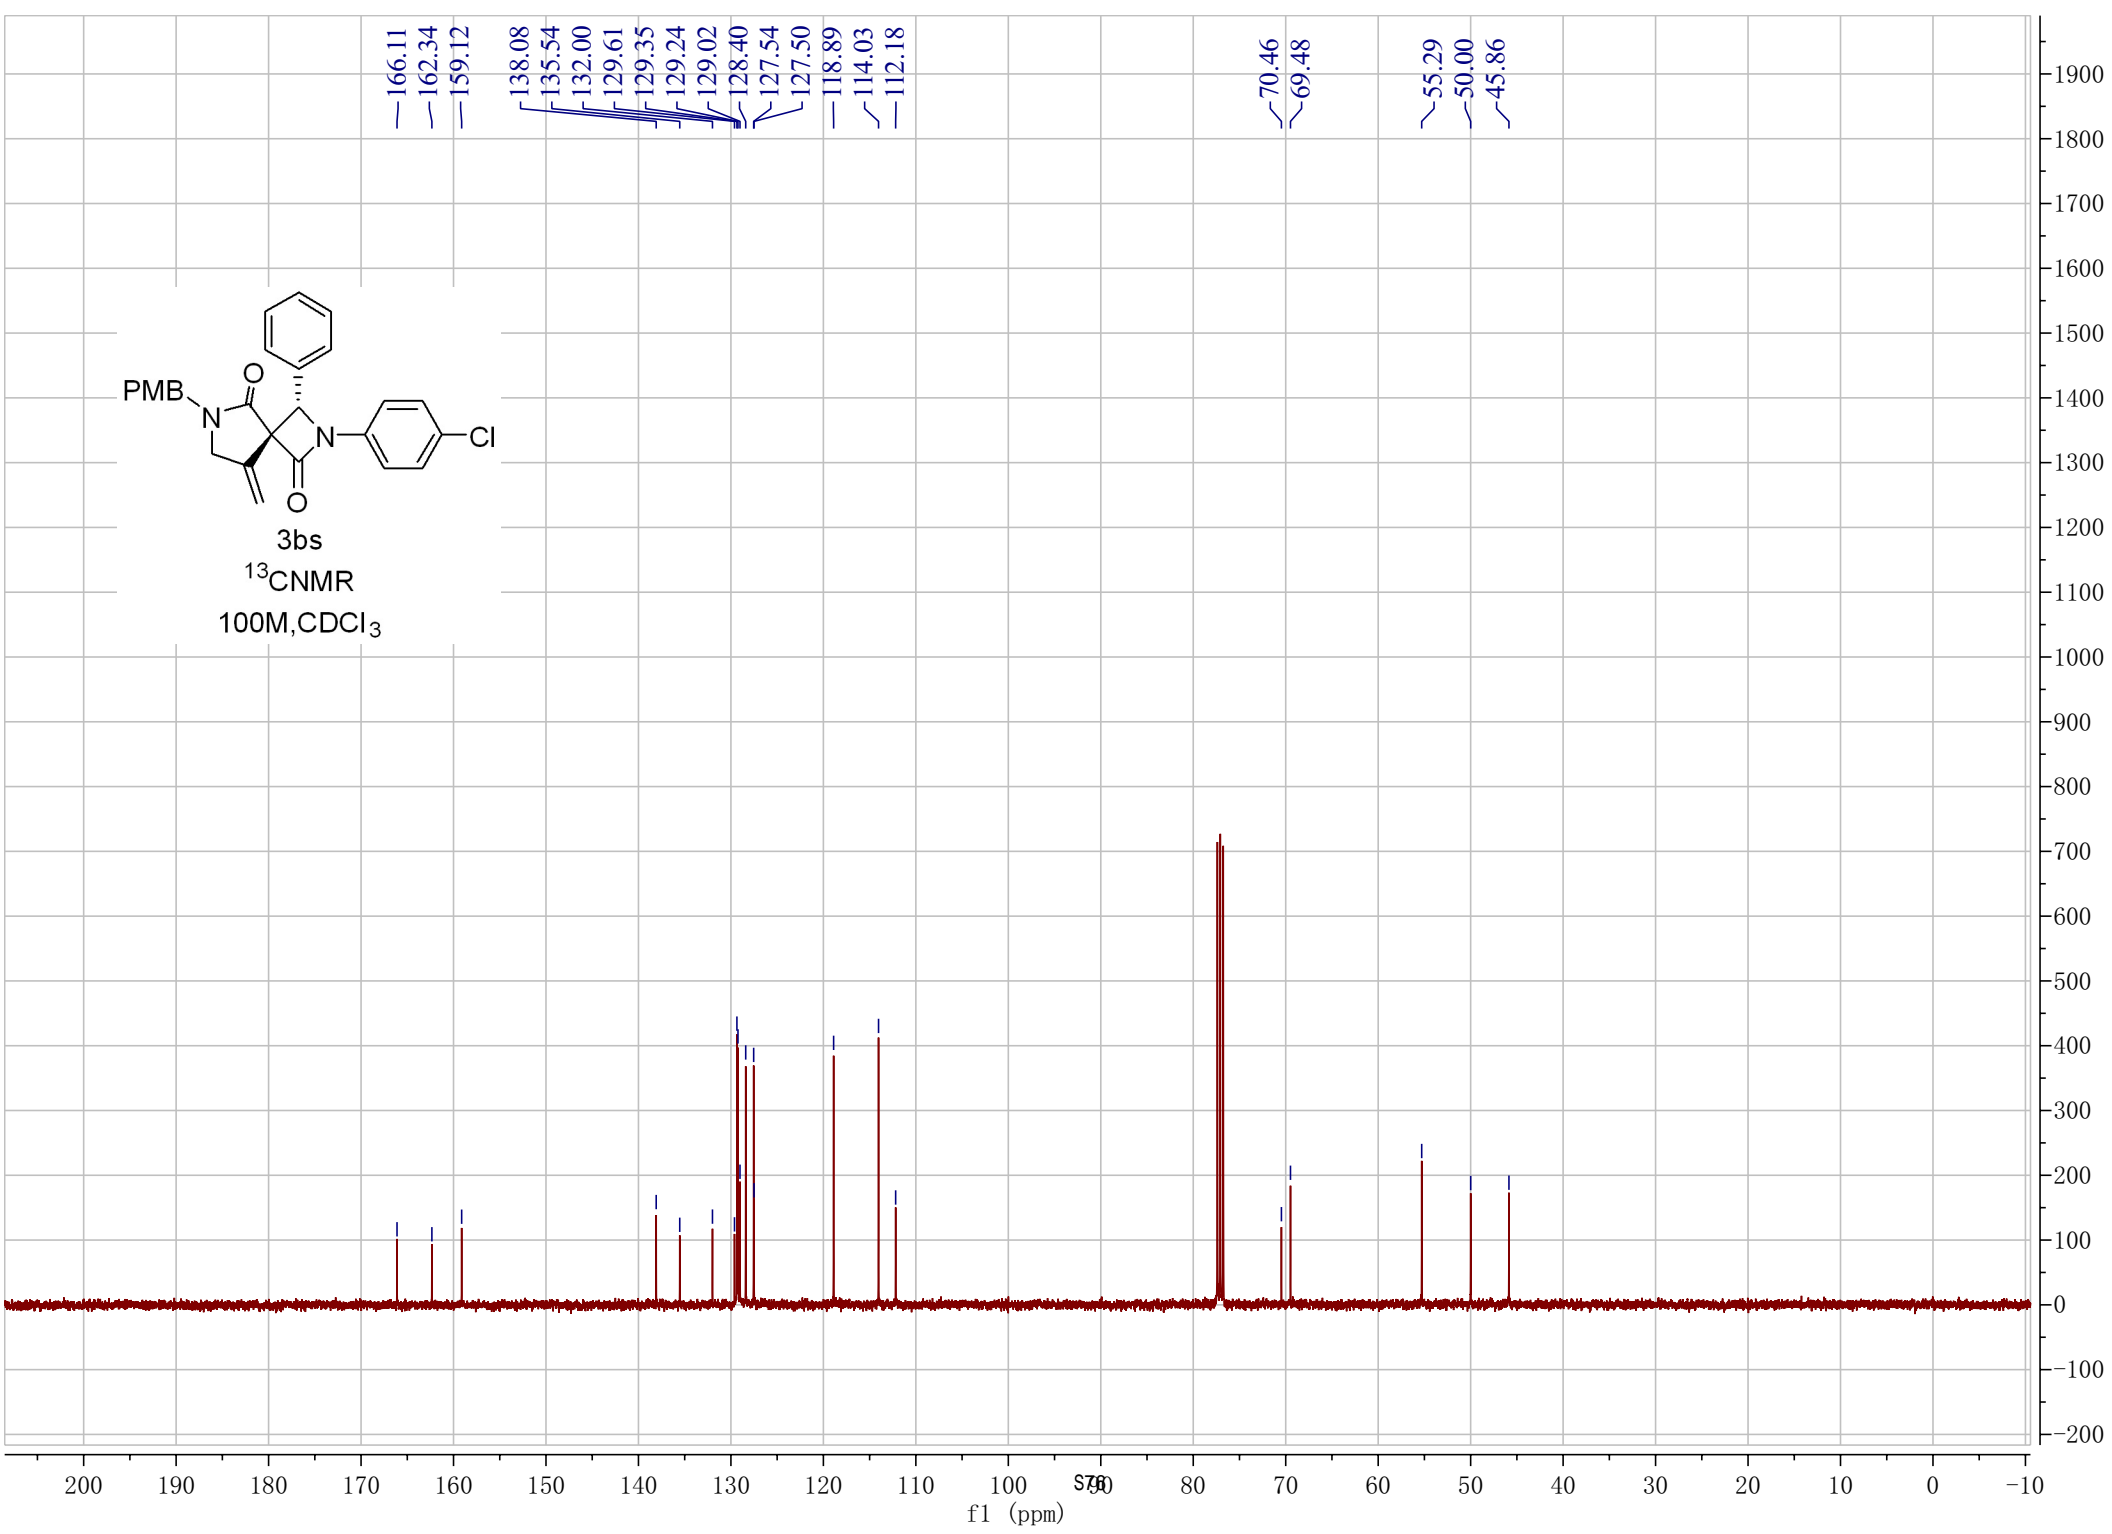

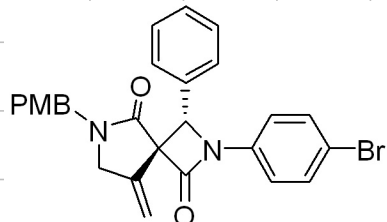

3bt

<sup>1</sup>H NMR  
400M, CDCl<sub>3</sub>

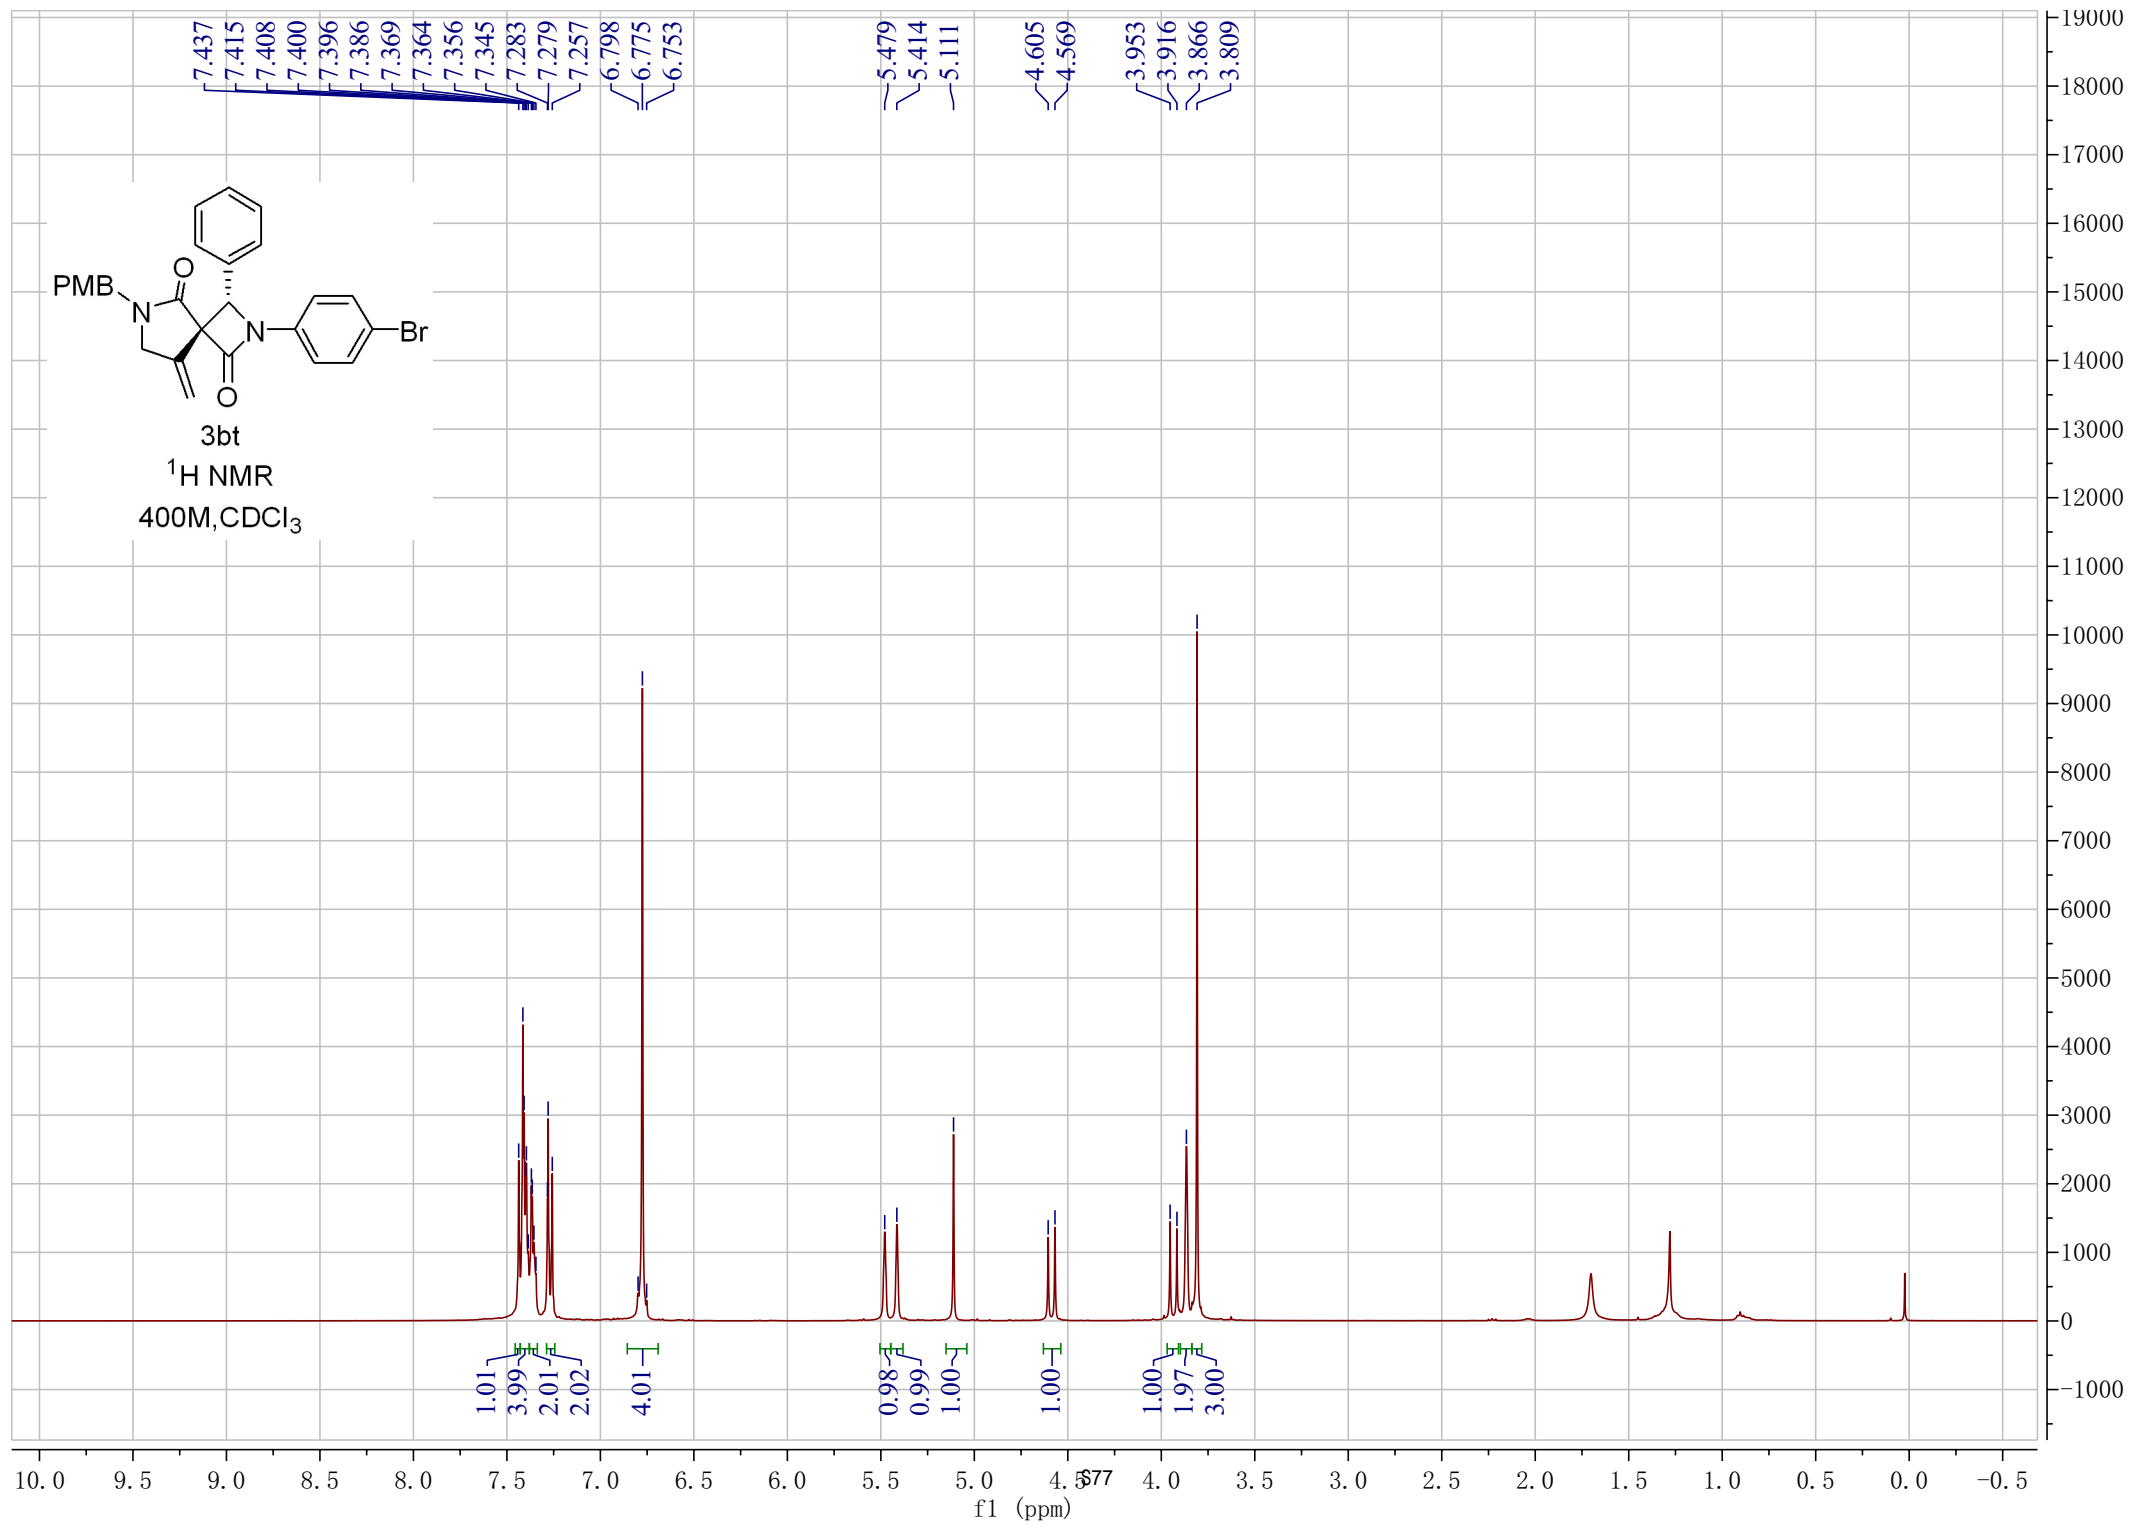

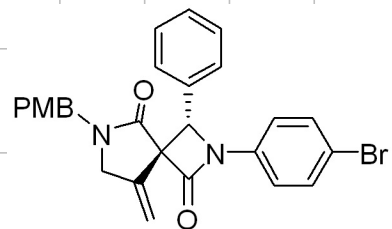

3bt

$^{13}\text{C}$ NMR  
100M,  $\text{CDCl}_3$

166.08  
162.36  
159.12  
138.06  
135.99  
132.16  
131.95  
129.35  
129.03  
128.41  
127.53  
127.50  
119.23  
117.27  
114.04  
112.20

70.48  
69.46

55.30  
50.00  
45.86

210 200 190 180 170 160 150 140 130 120 110 100 90 80 70 60 50 40 30 20 10 0 -10

f1 (ppm)

S78

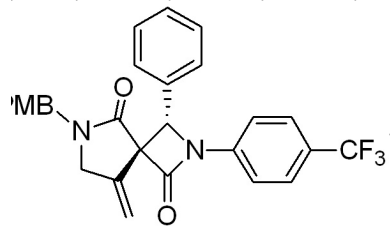

3bu  
<sup>1</sup>H NMR  
400M, CDCl<sub>3</sub>

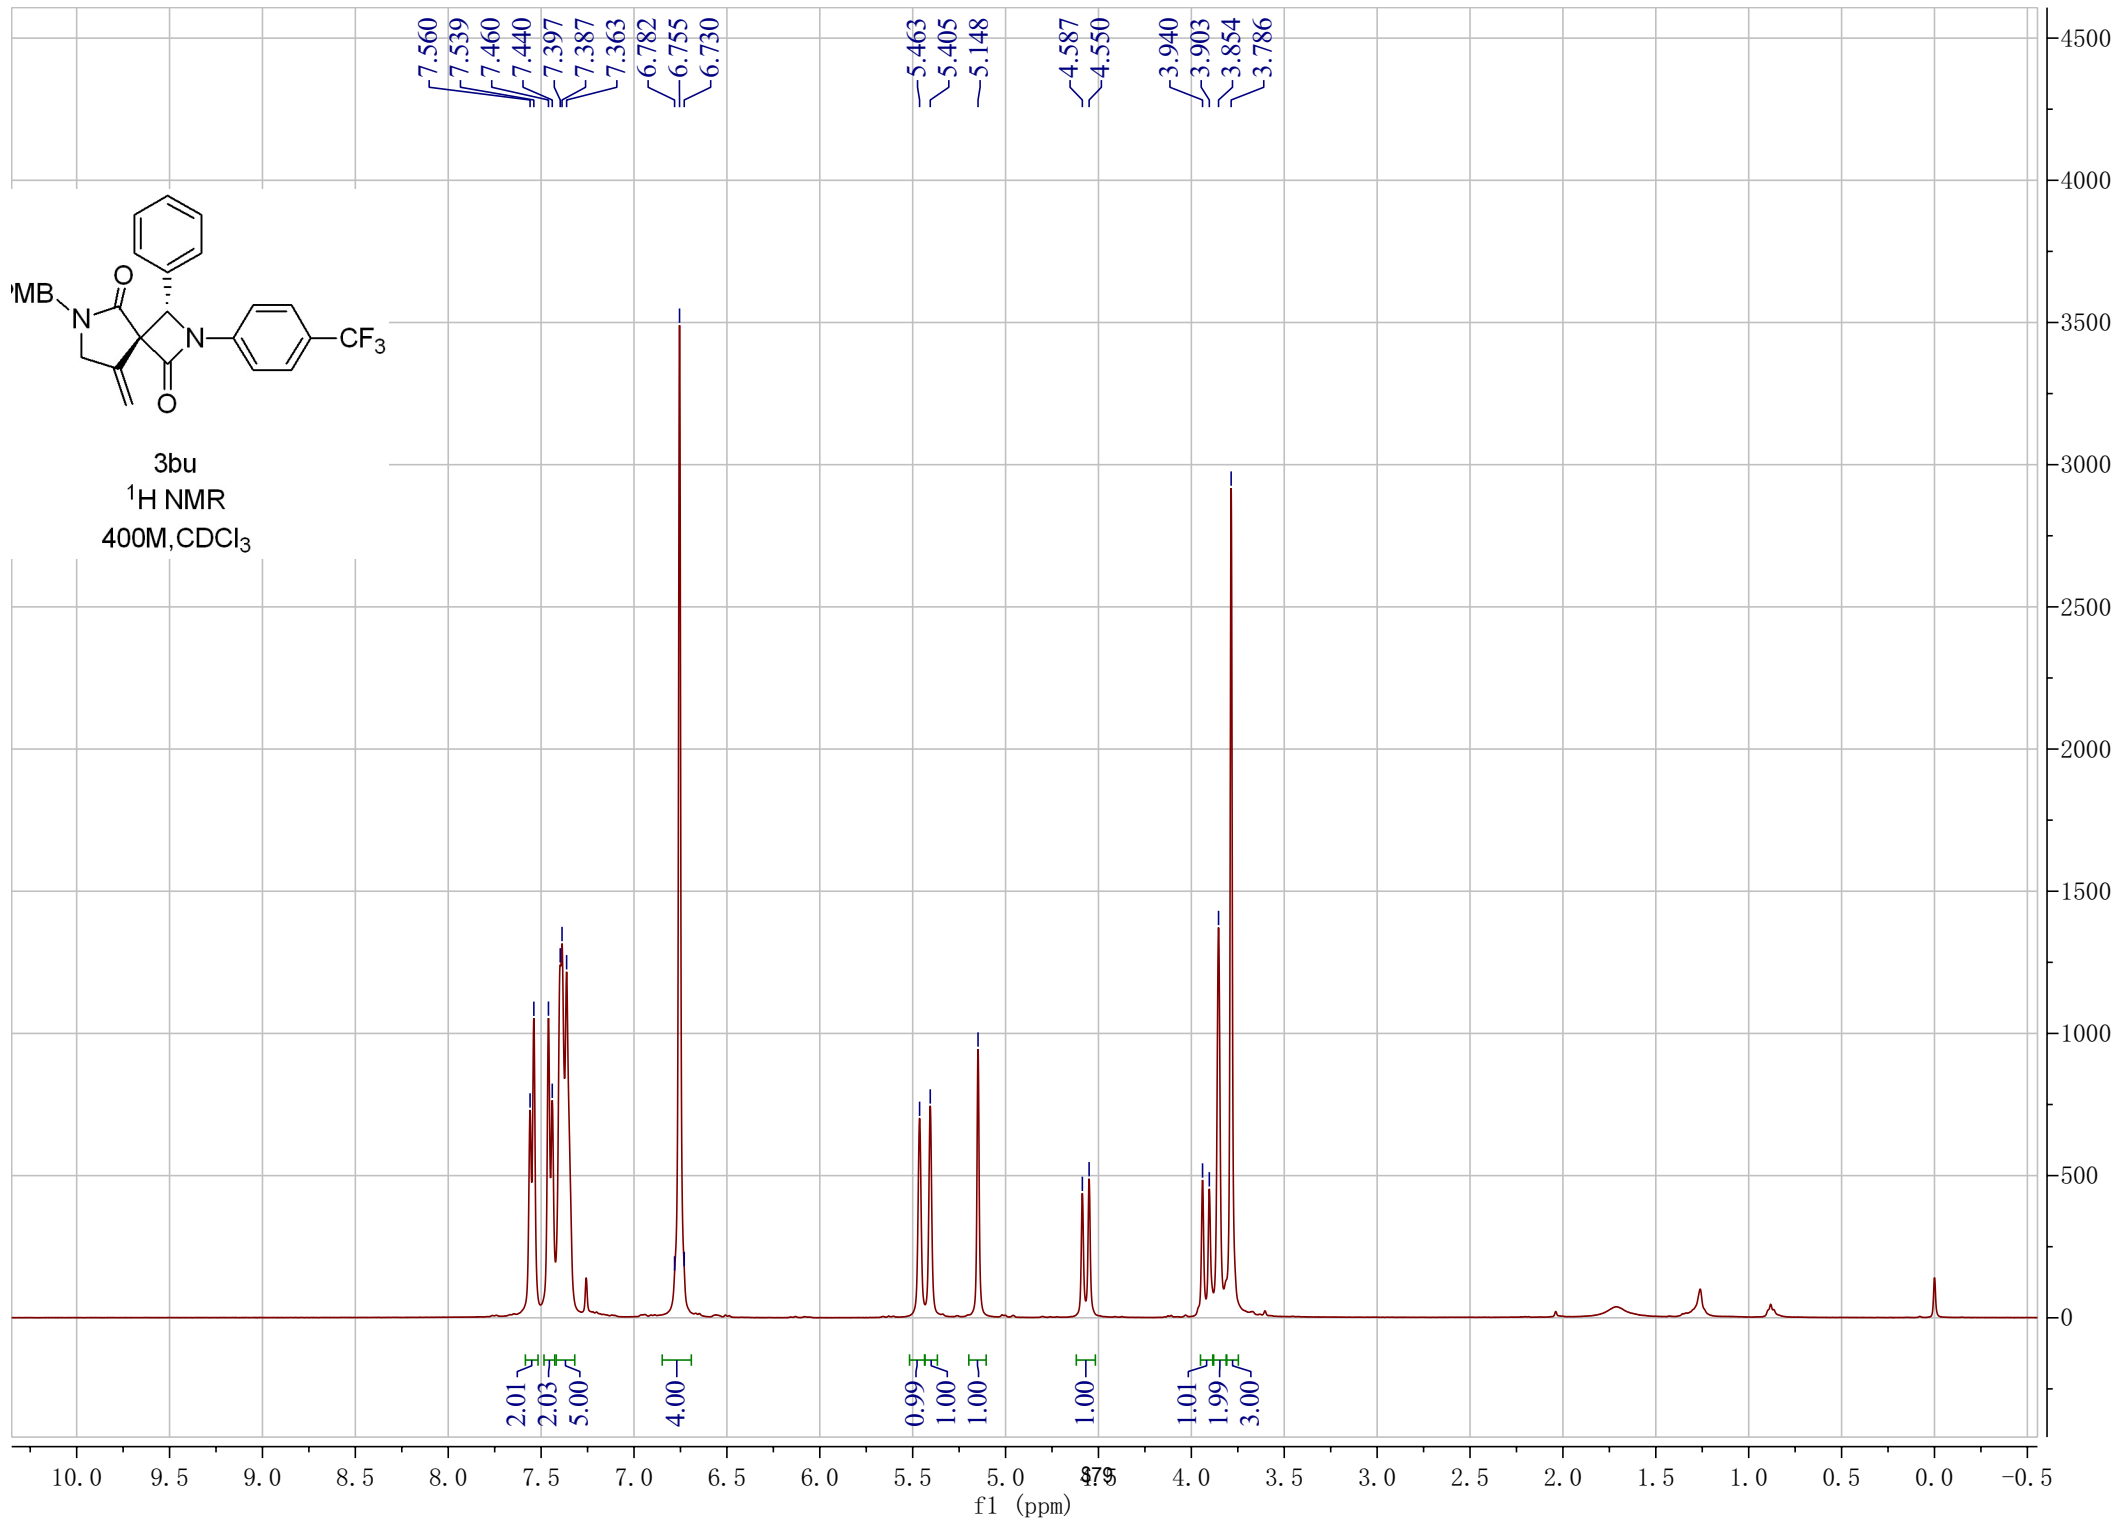

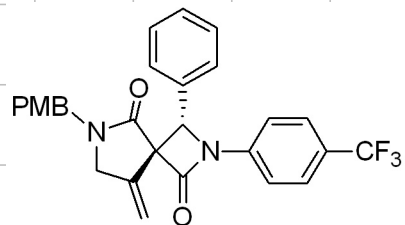

3bu  
<sup>13</sup>CNMR  
100M, CDCl<sub>3</sub>

- 165.95
- 162.77
- 159.15
- 139.71
- 138.01
- 131.77
- 129.35
- 129.14
- 128.48
- 128.03
- 127.52
- 127.44
- 126.50
- 126.47
- 126.43
- 126.34
- 126.08
- 125.32
- 122.62
- 117.57
- 114.05
- 112.33
- 70.60
- 69.61
- 55.29
- 50.00
- 45.87

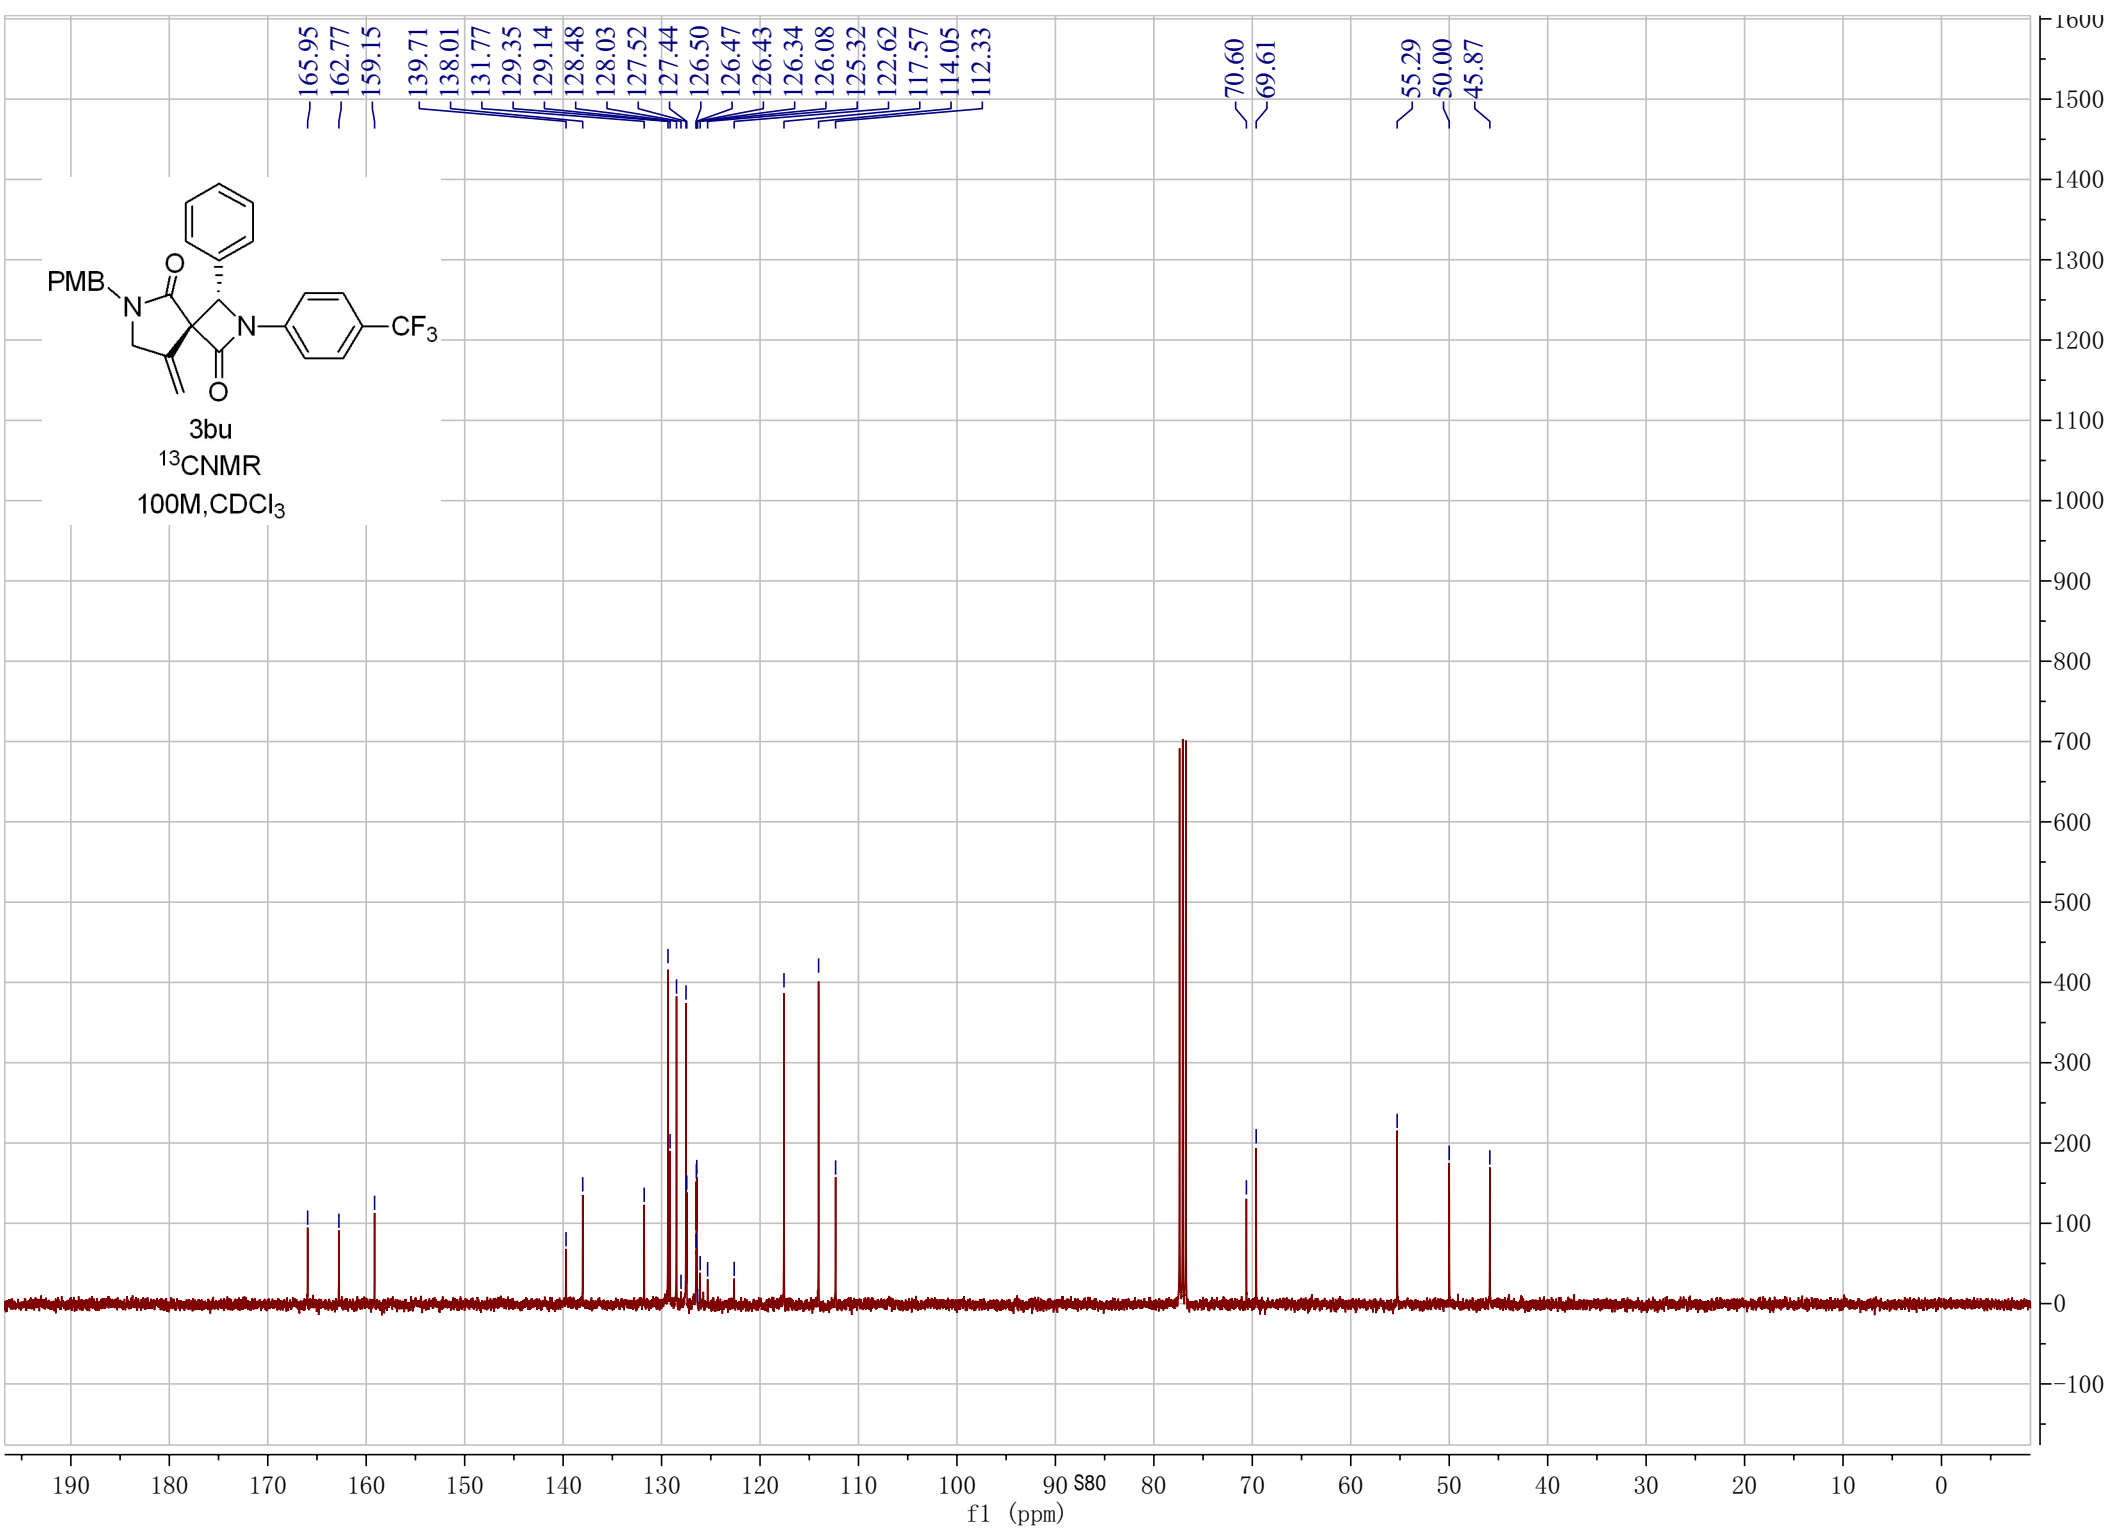



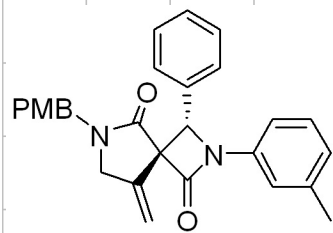

3b  
<sup>1</sup>H NMR  
400MHz CDCl<sub>3</sub>

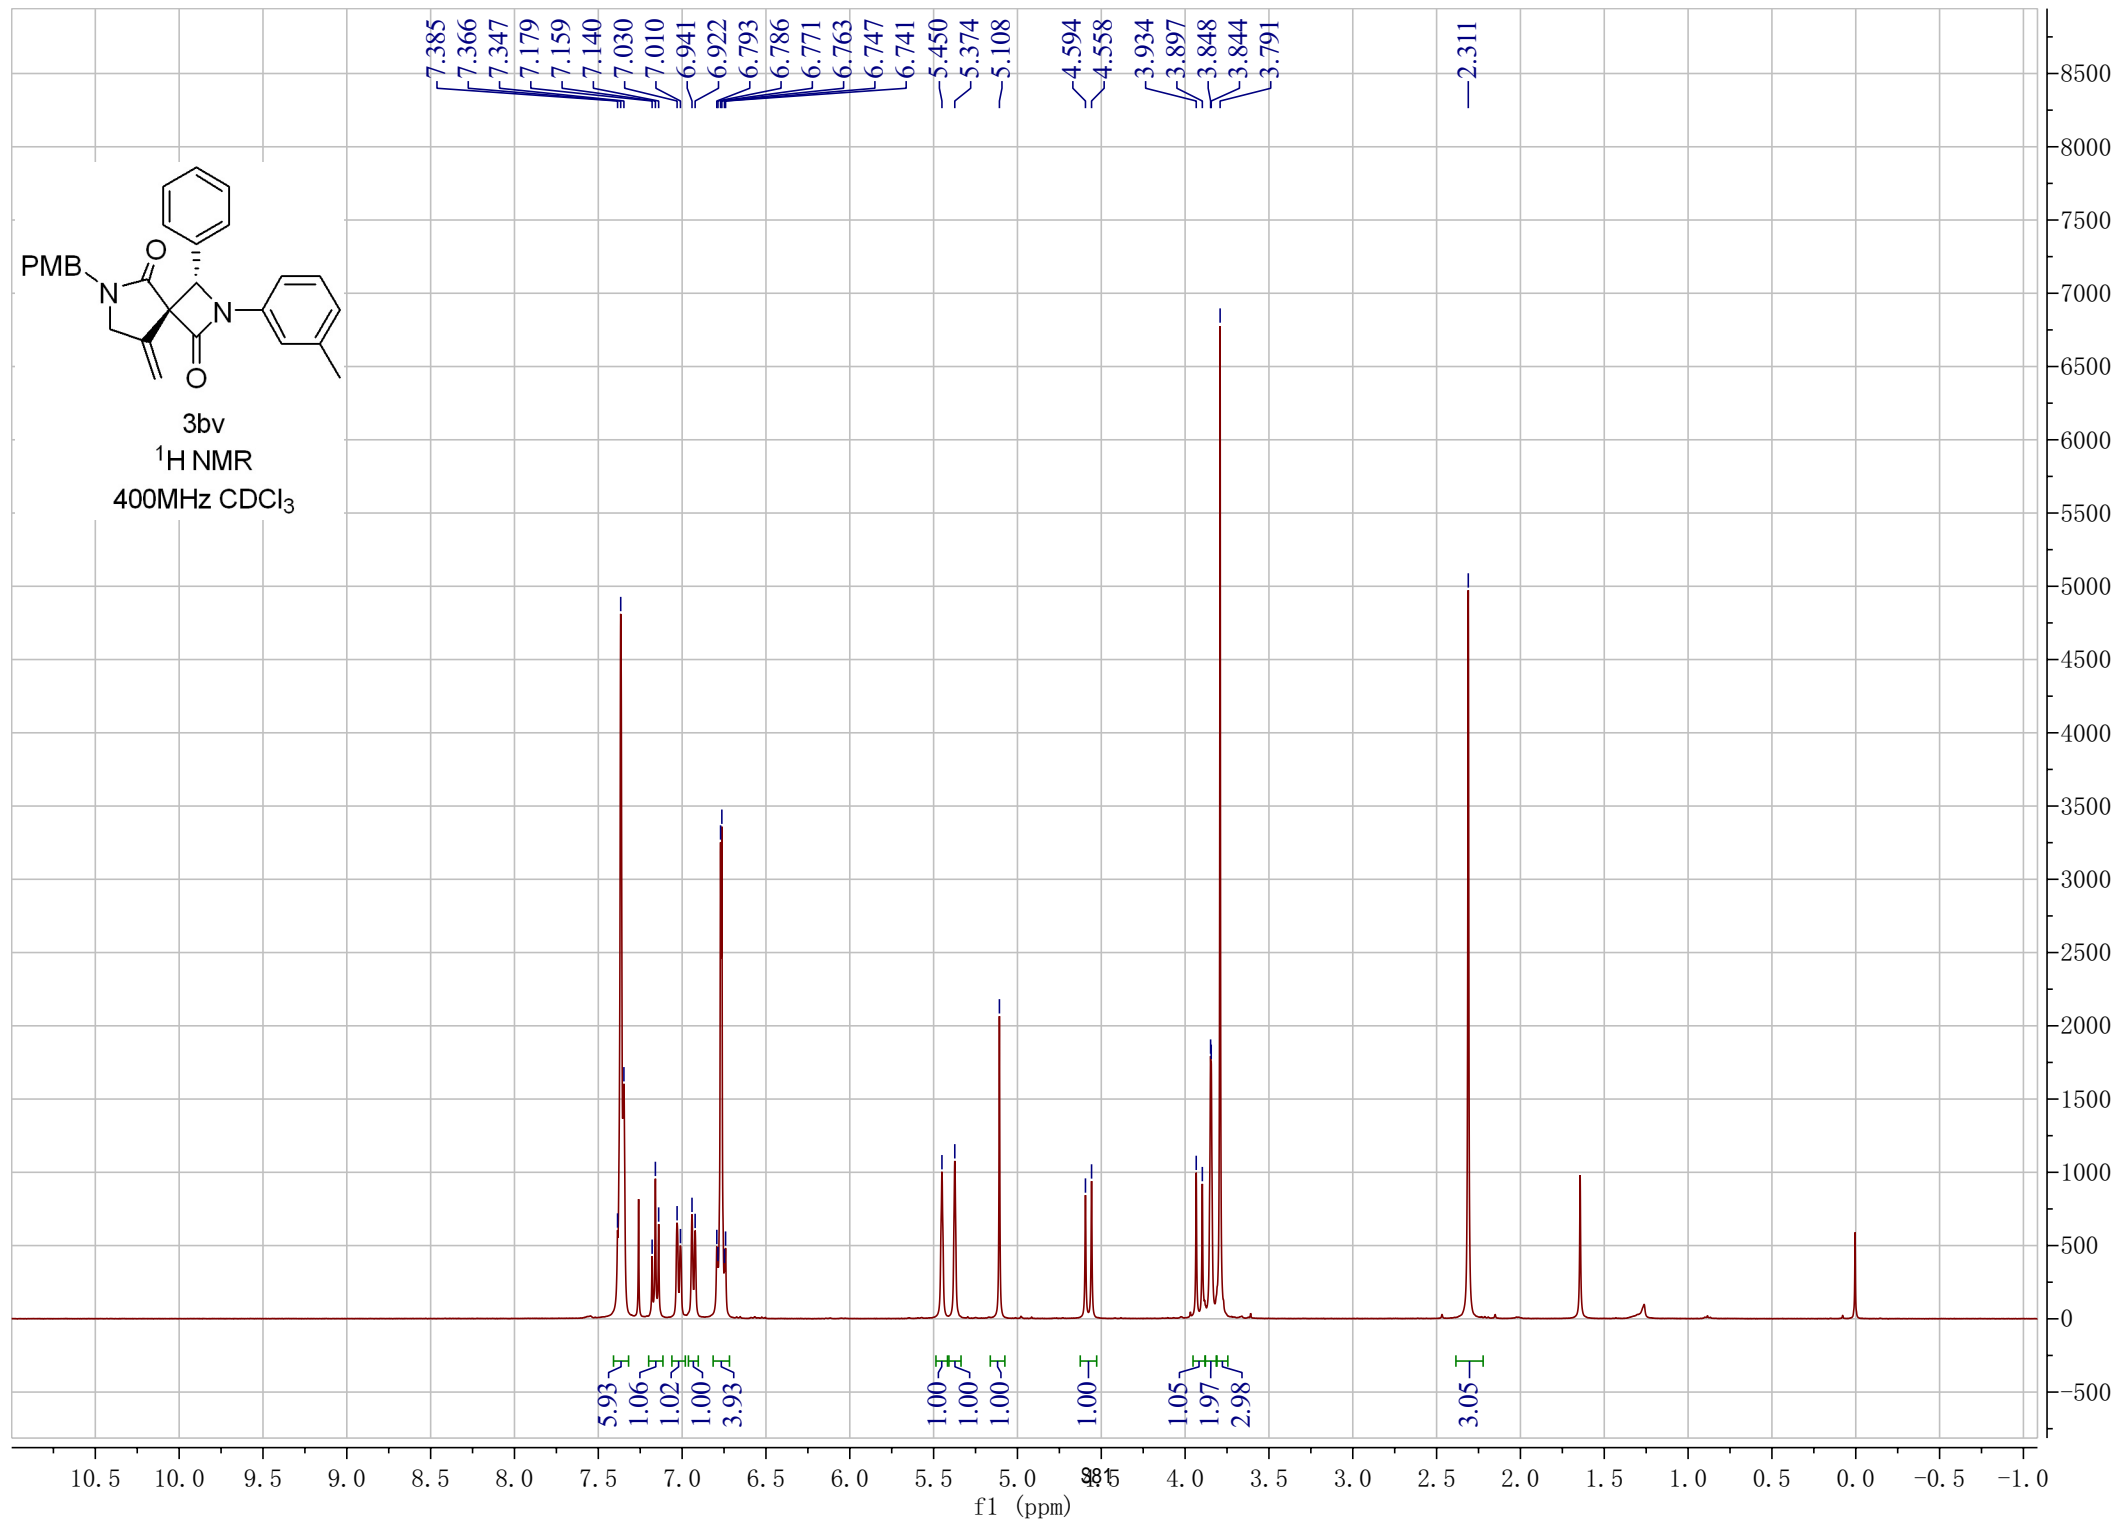

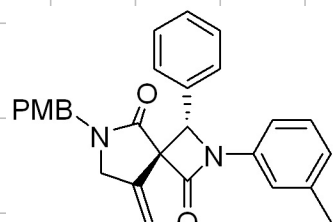

3bv  
 $^{13}\text{C}$  NMR  
100MHz  $\text{CDCl}_3$

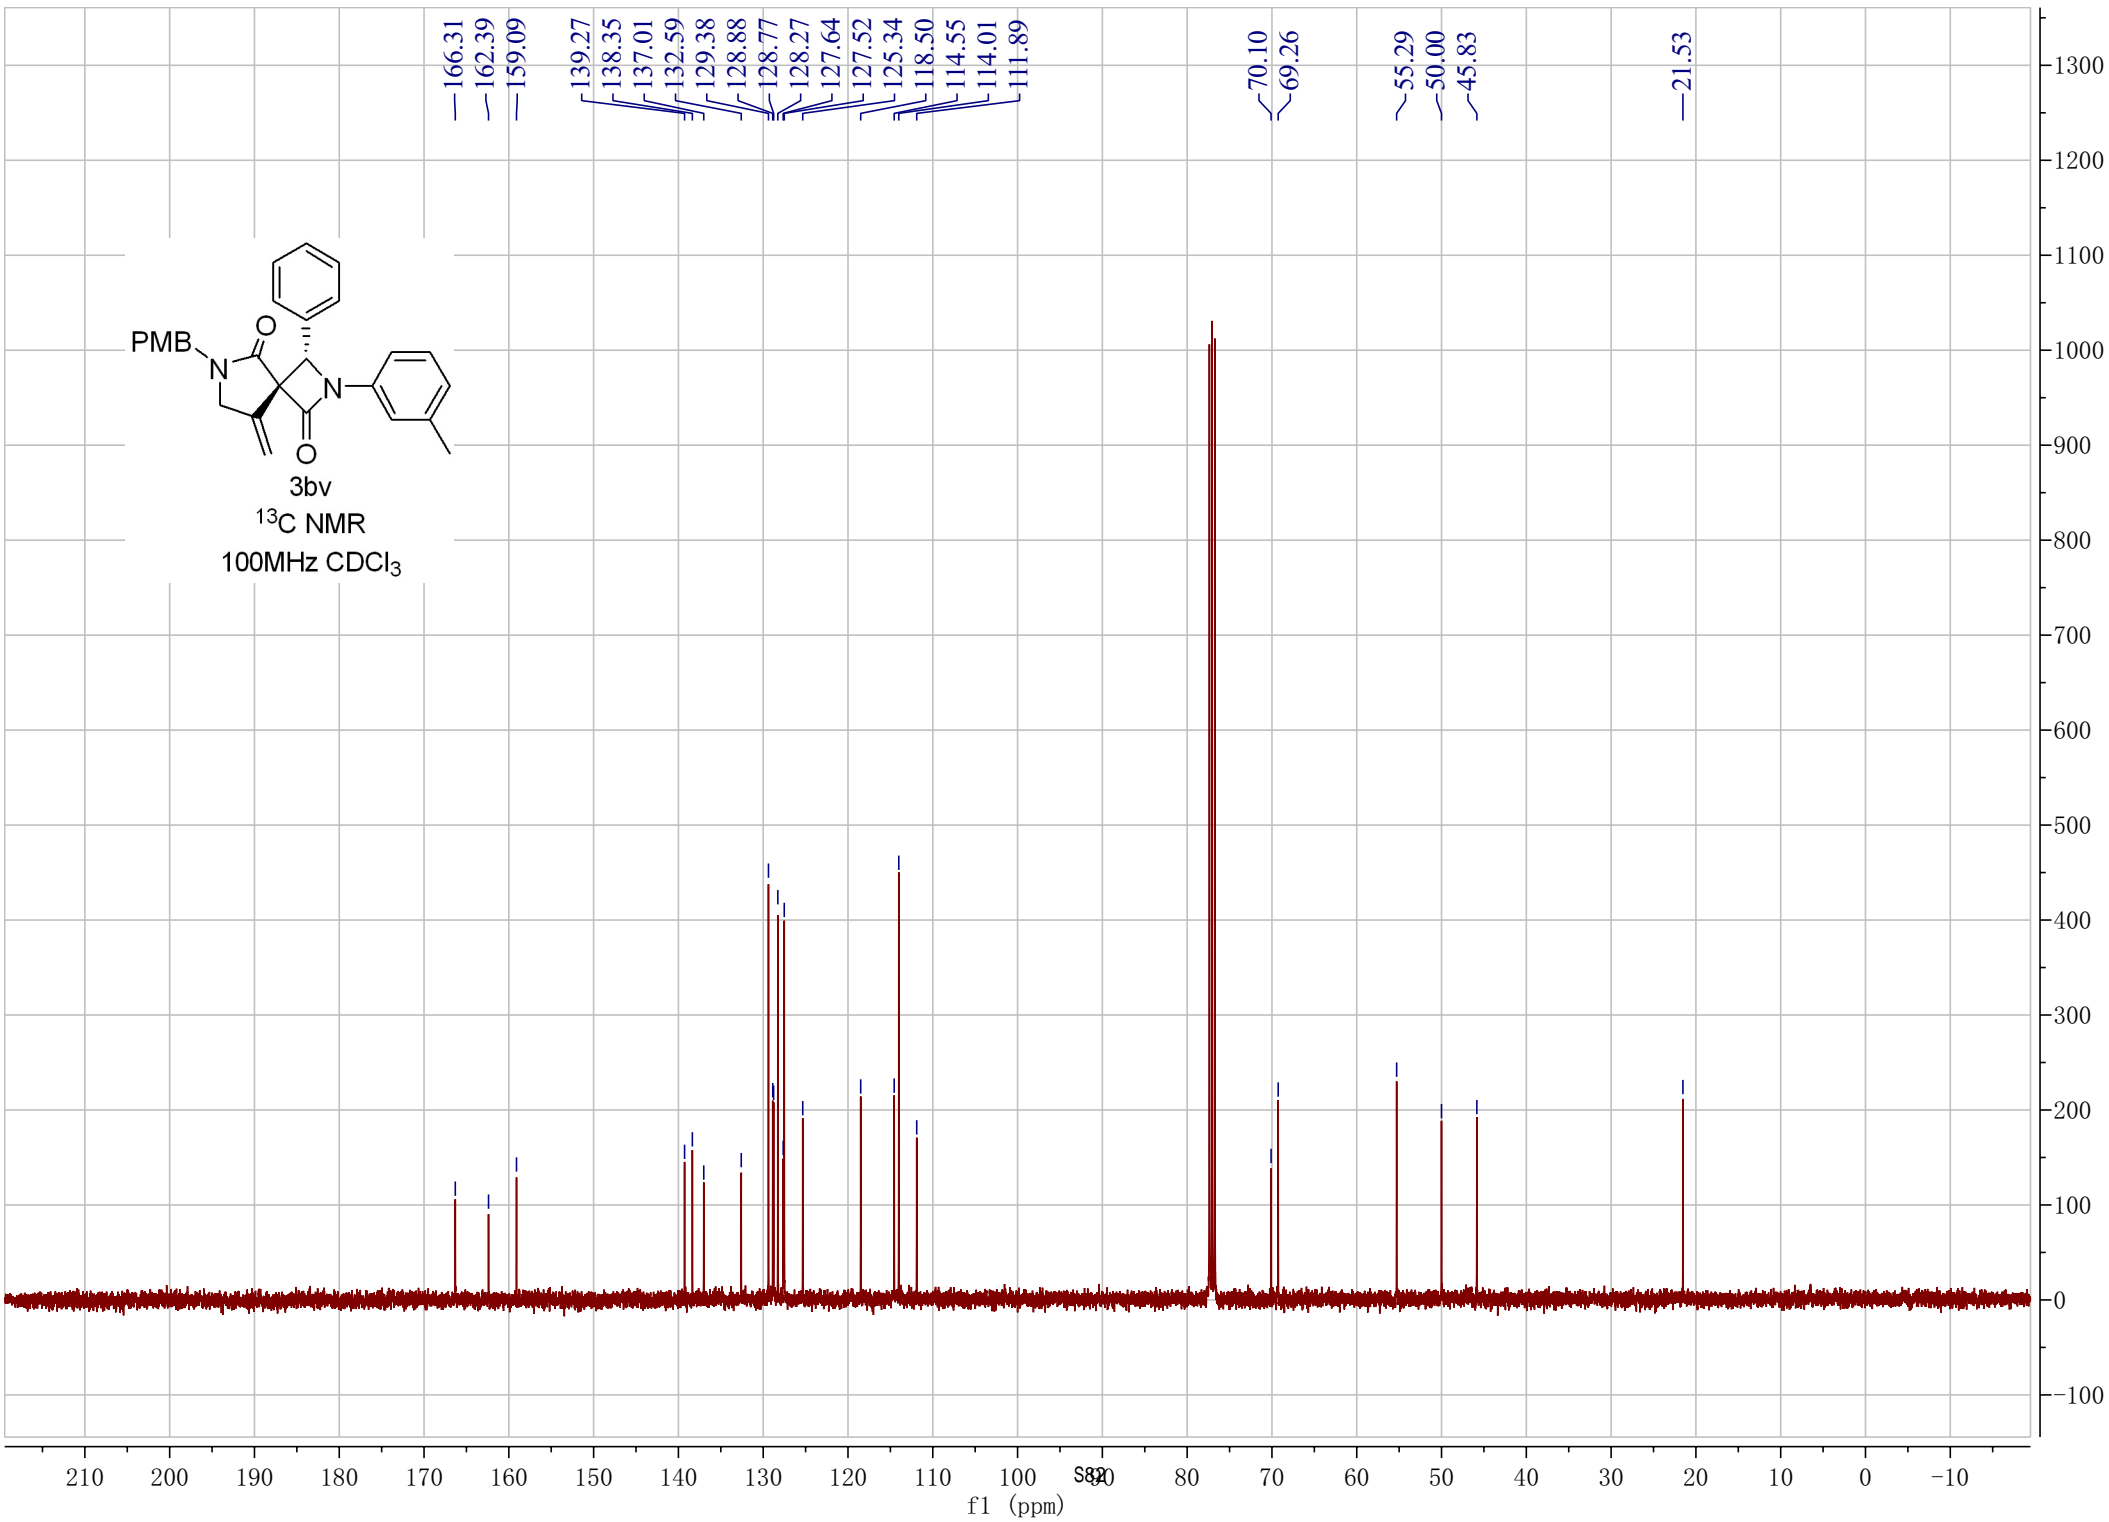

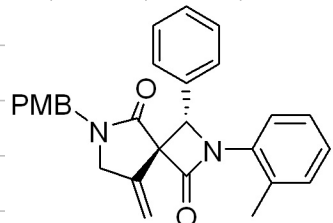

3bw  
<sup>1</sup>H NMR  
400MHz CDCl<sub>3</sub>

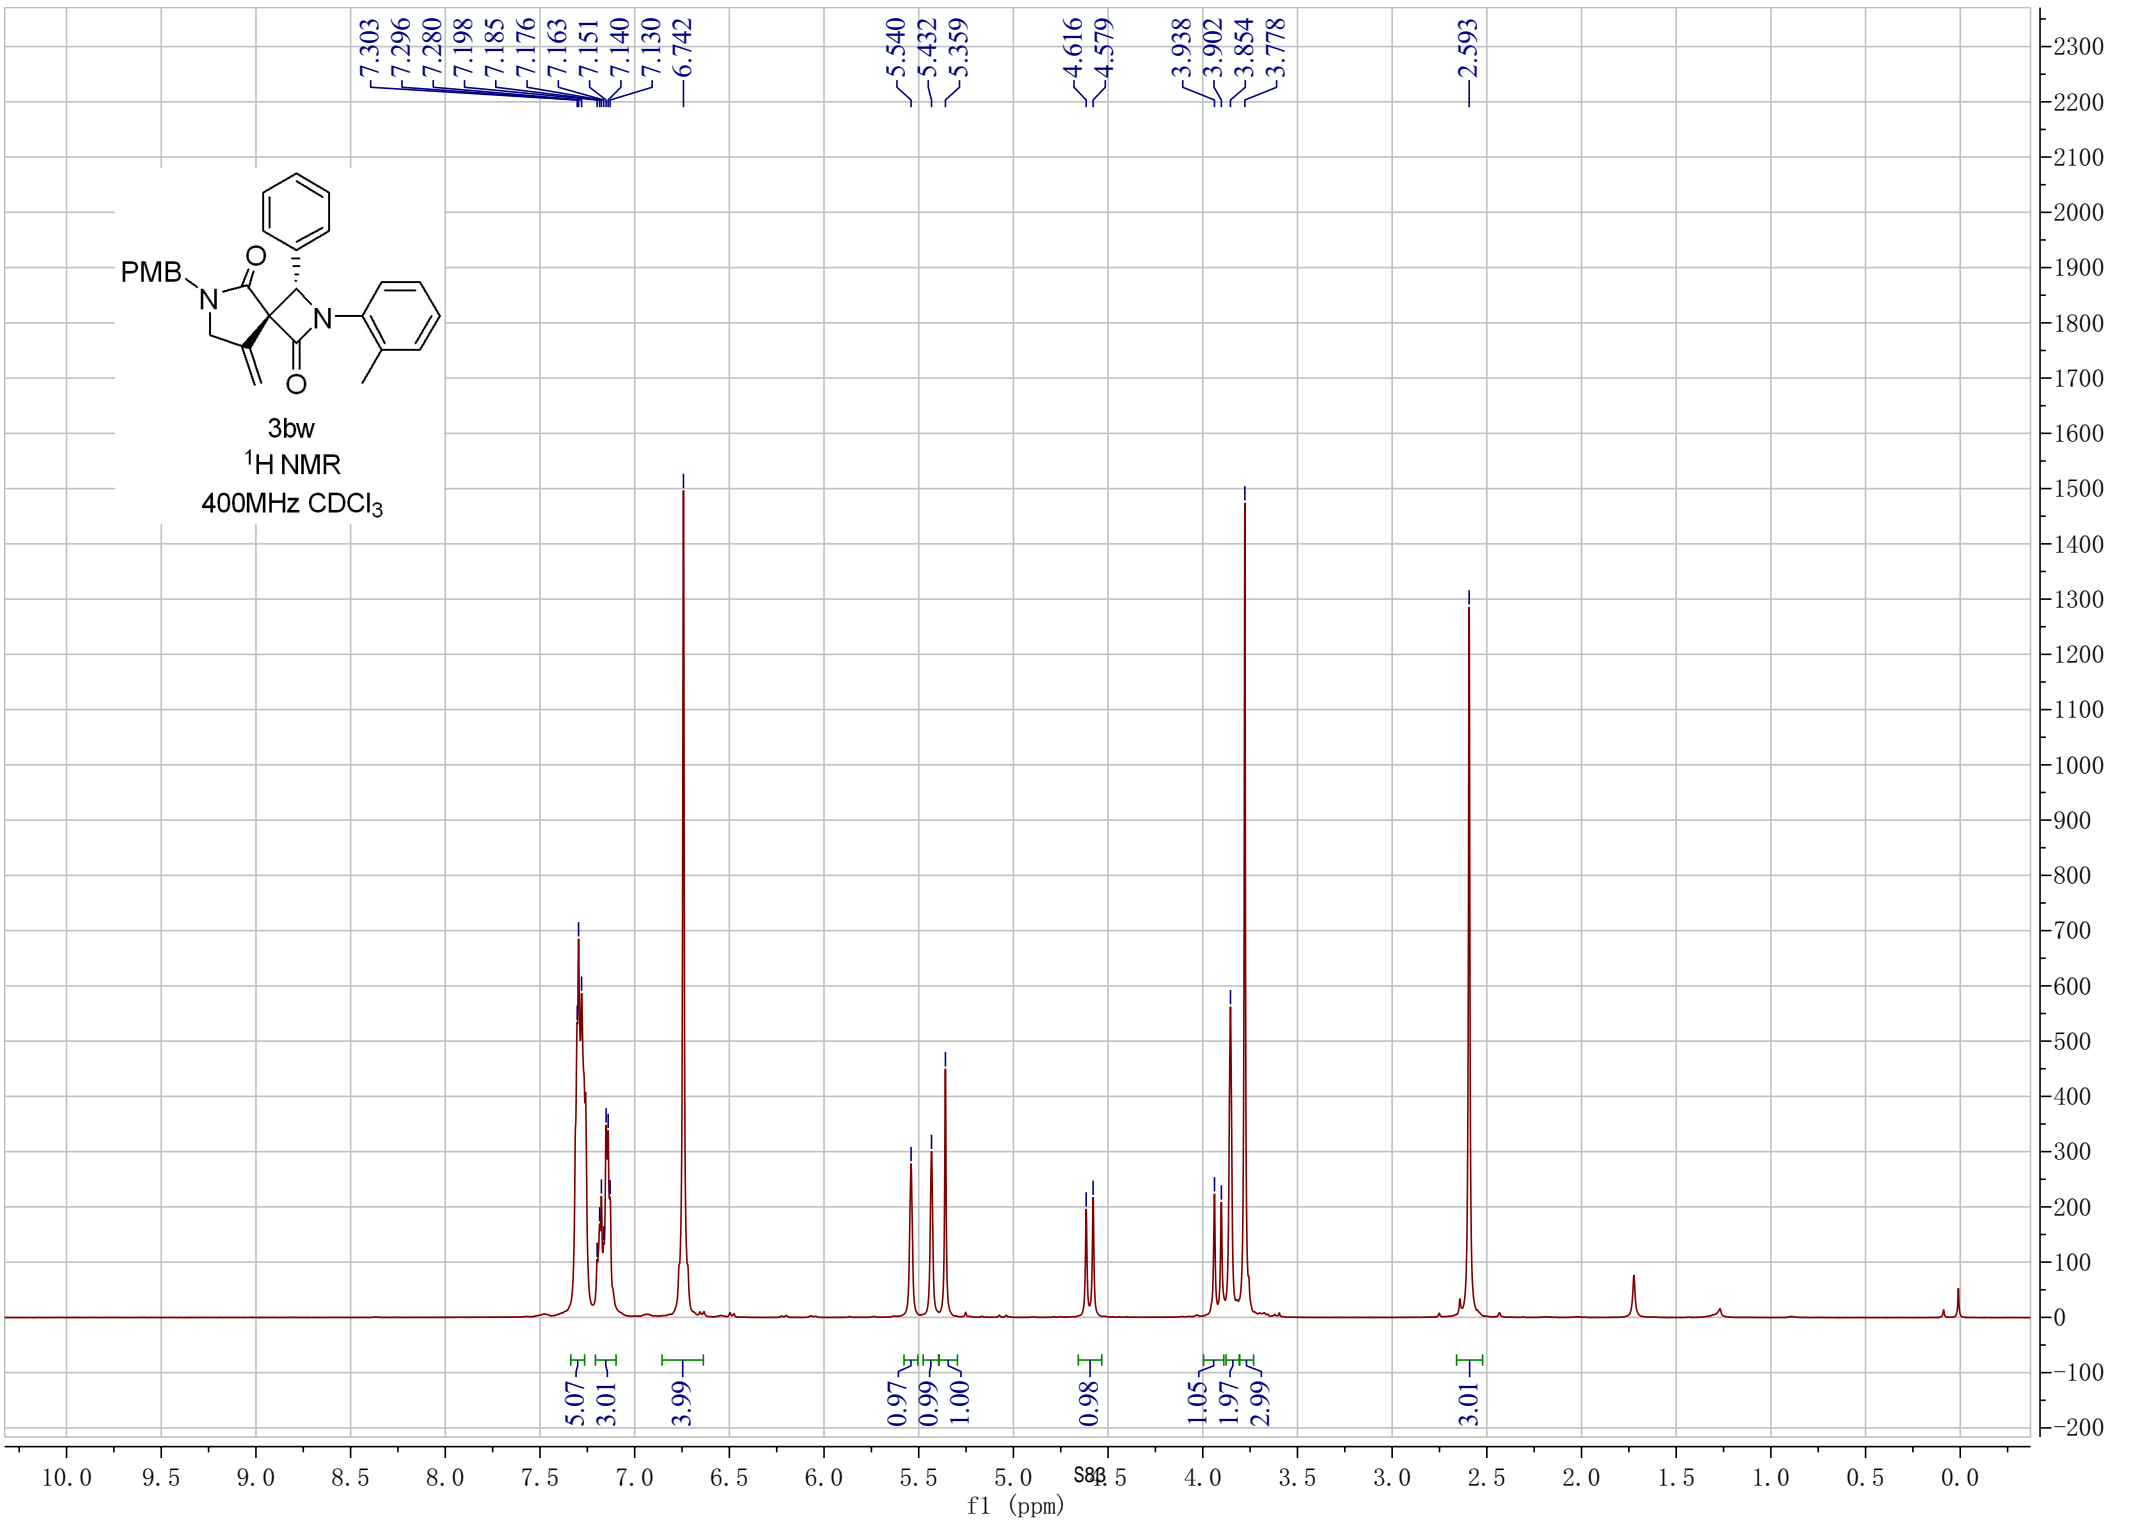

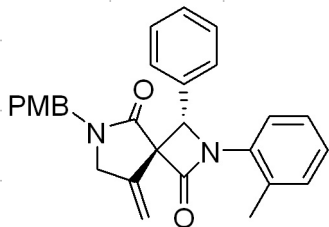

3bw  
<sup>13</sup>C NMR  
100MHz CDCl<sub>3</sub>

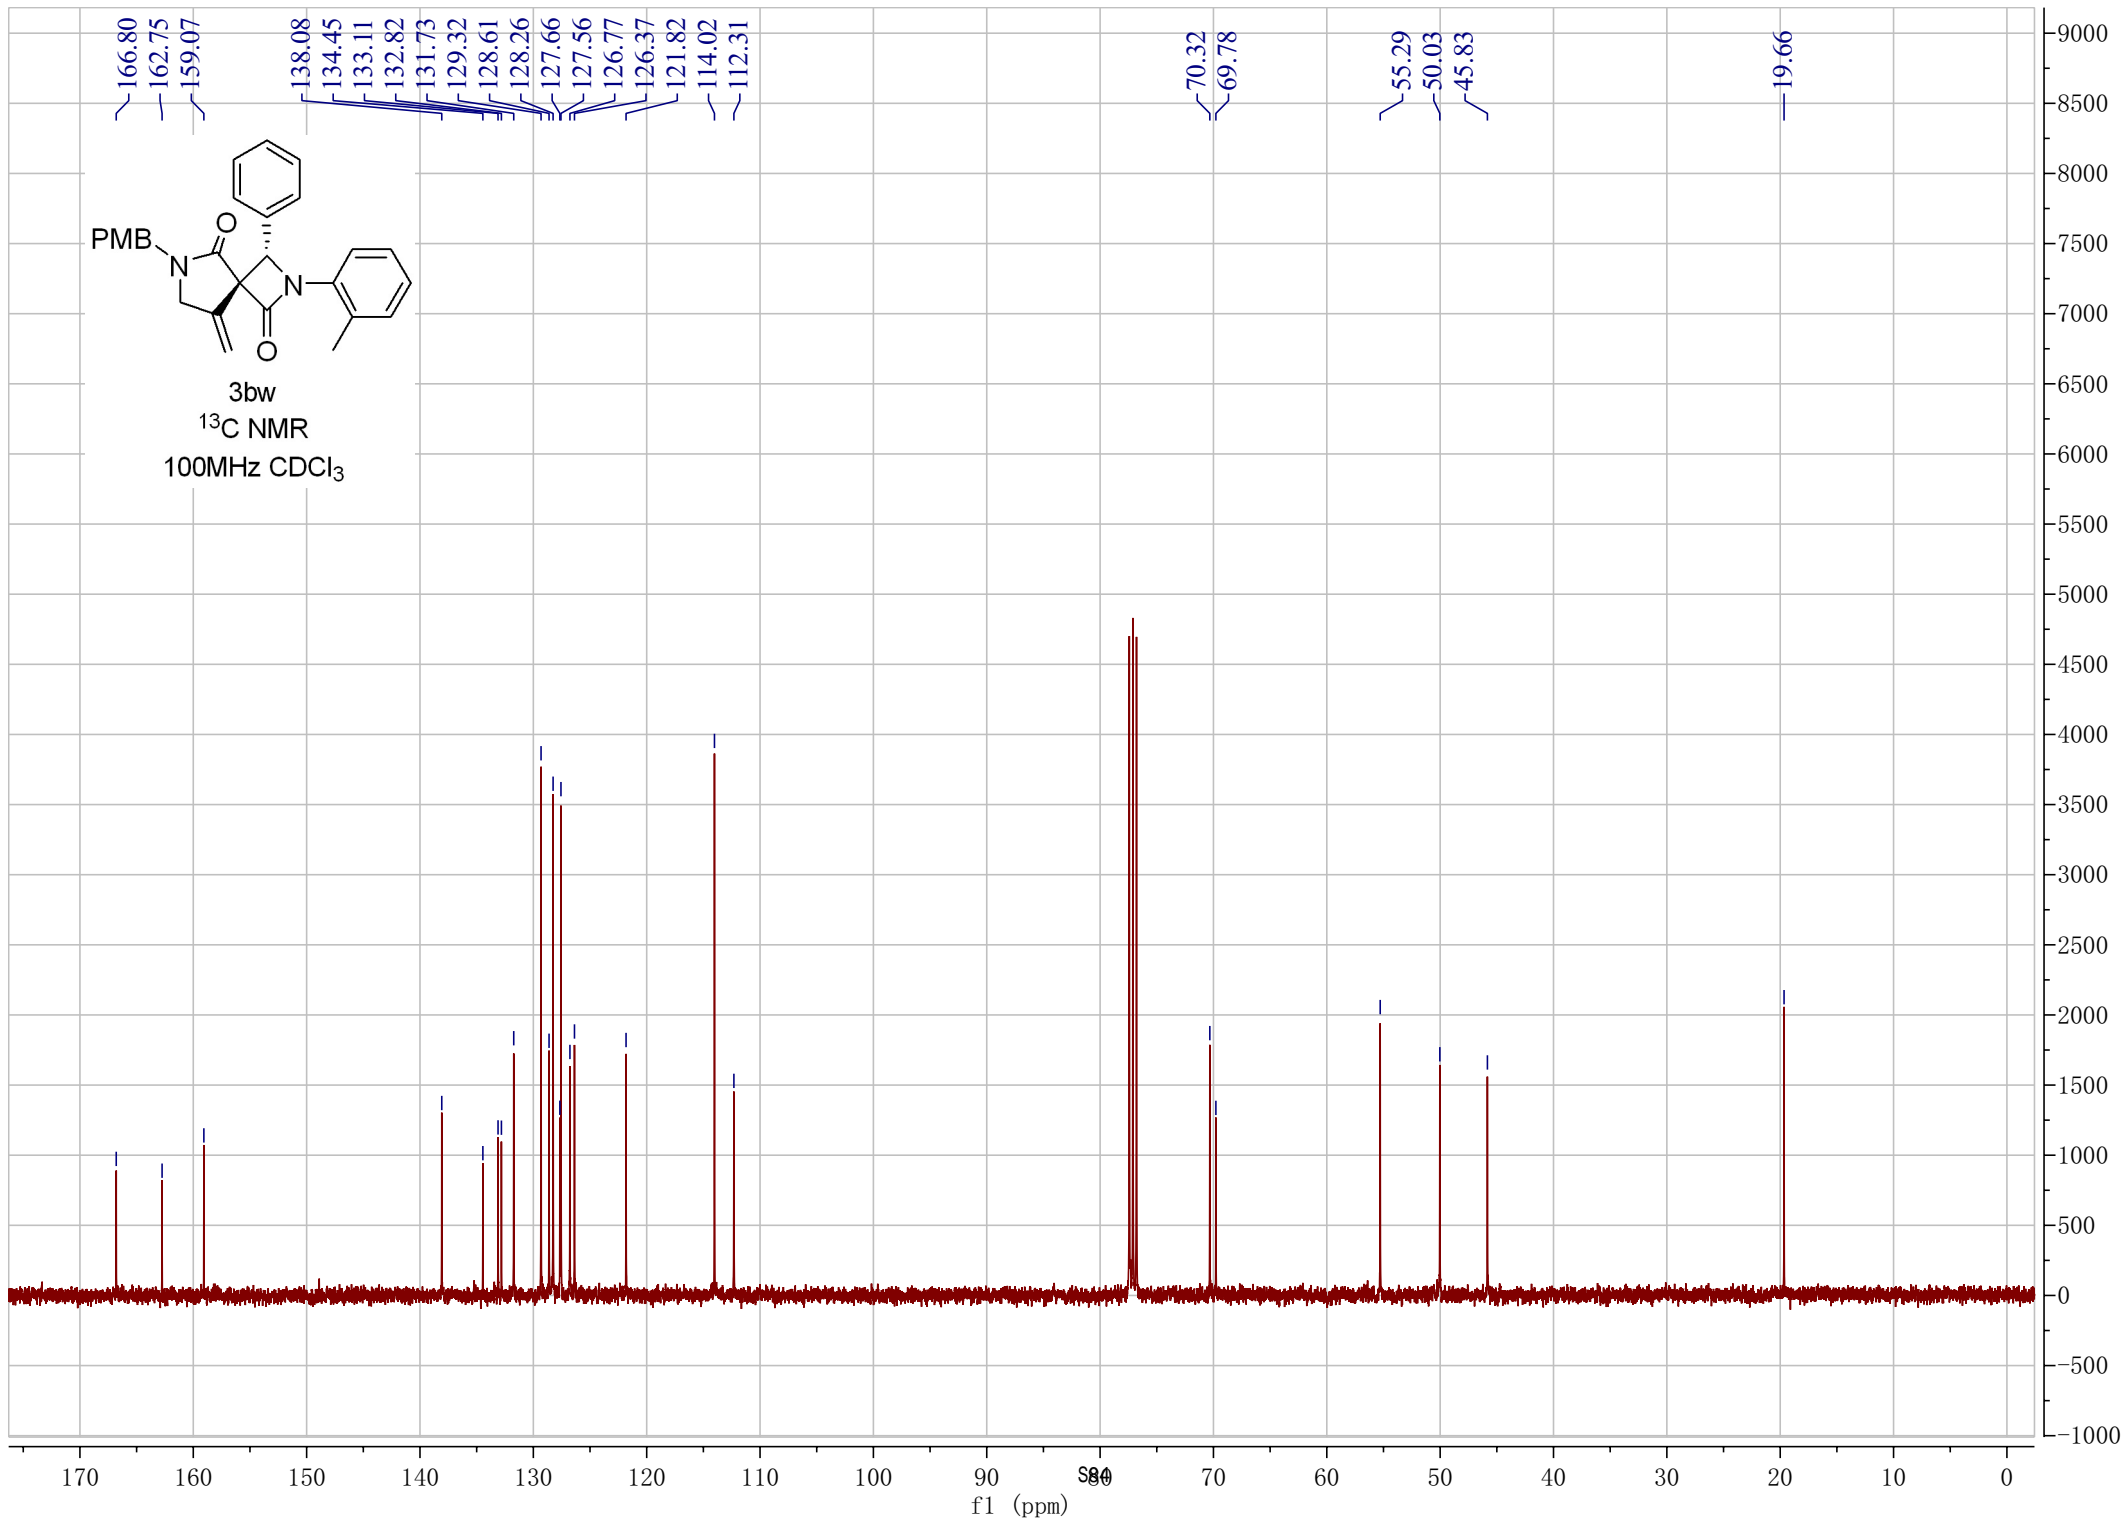

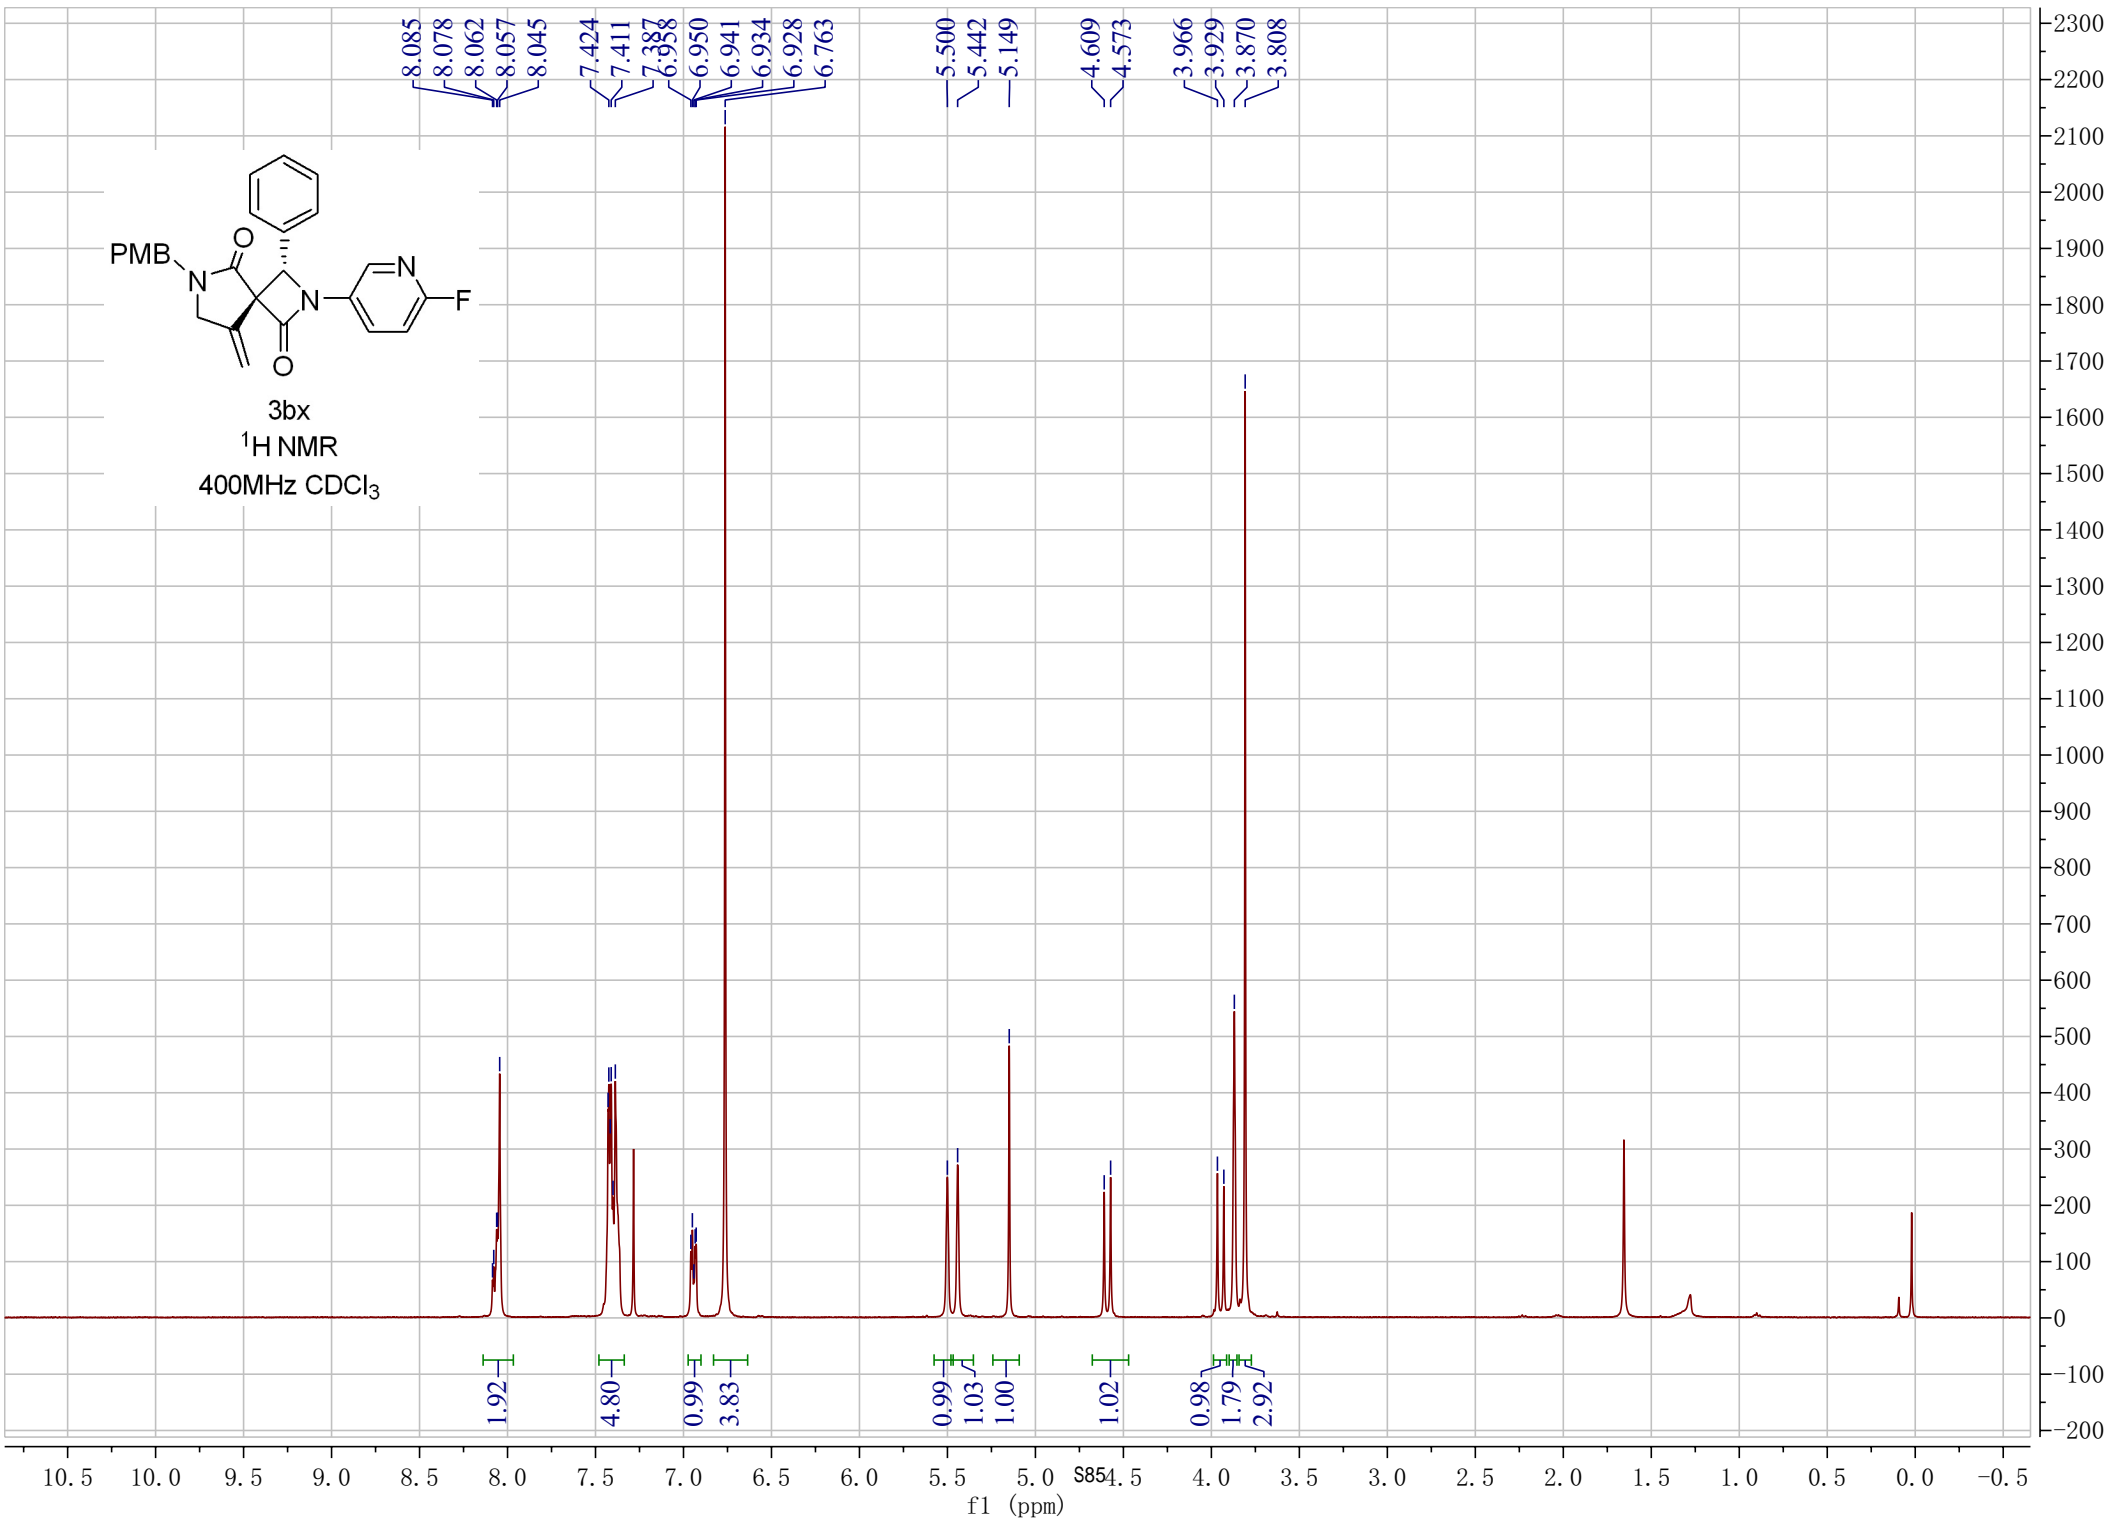

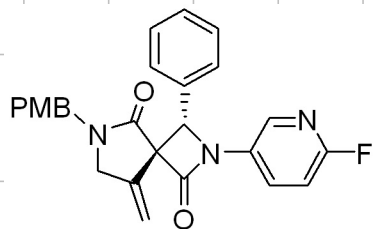

3bx  
<sup>13</sup>C NMR  
100MHz CDCl<sub>3</sub>

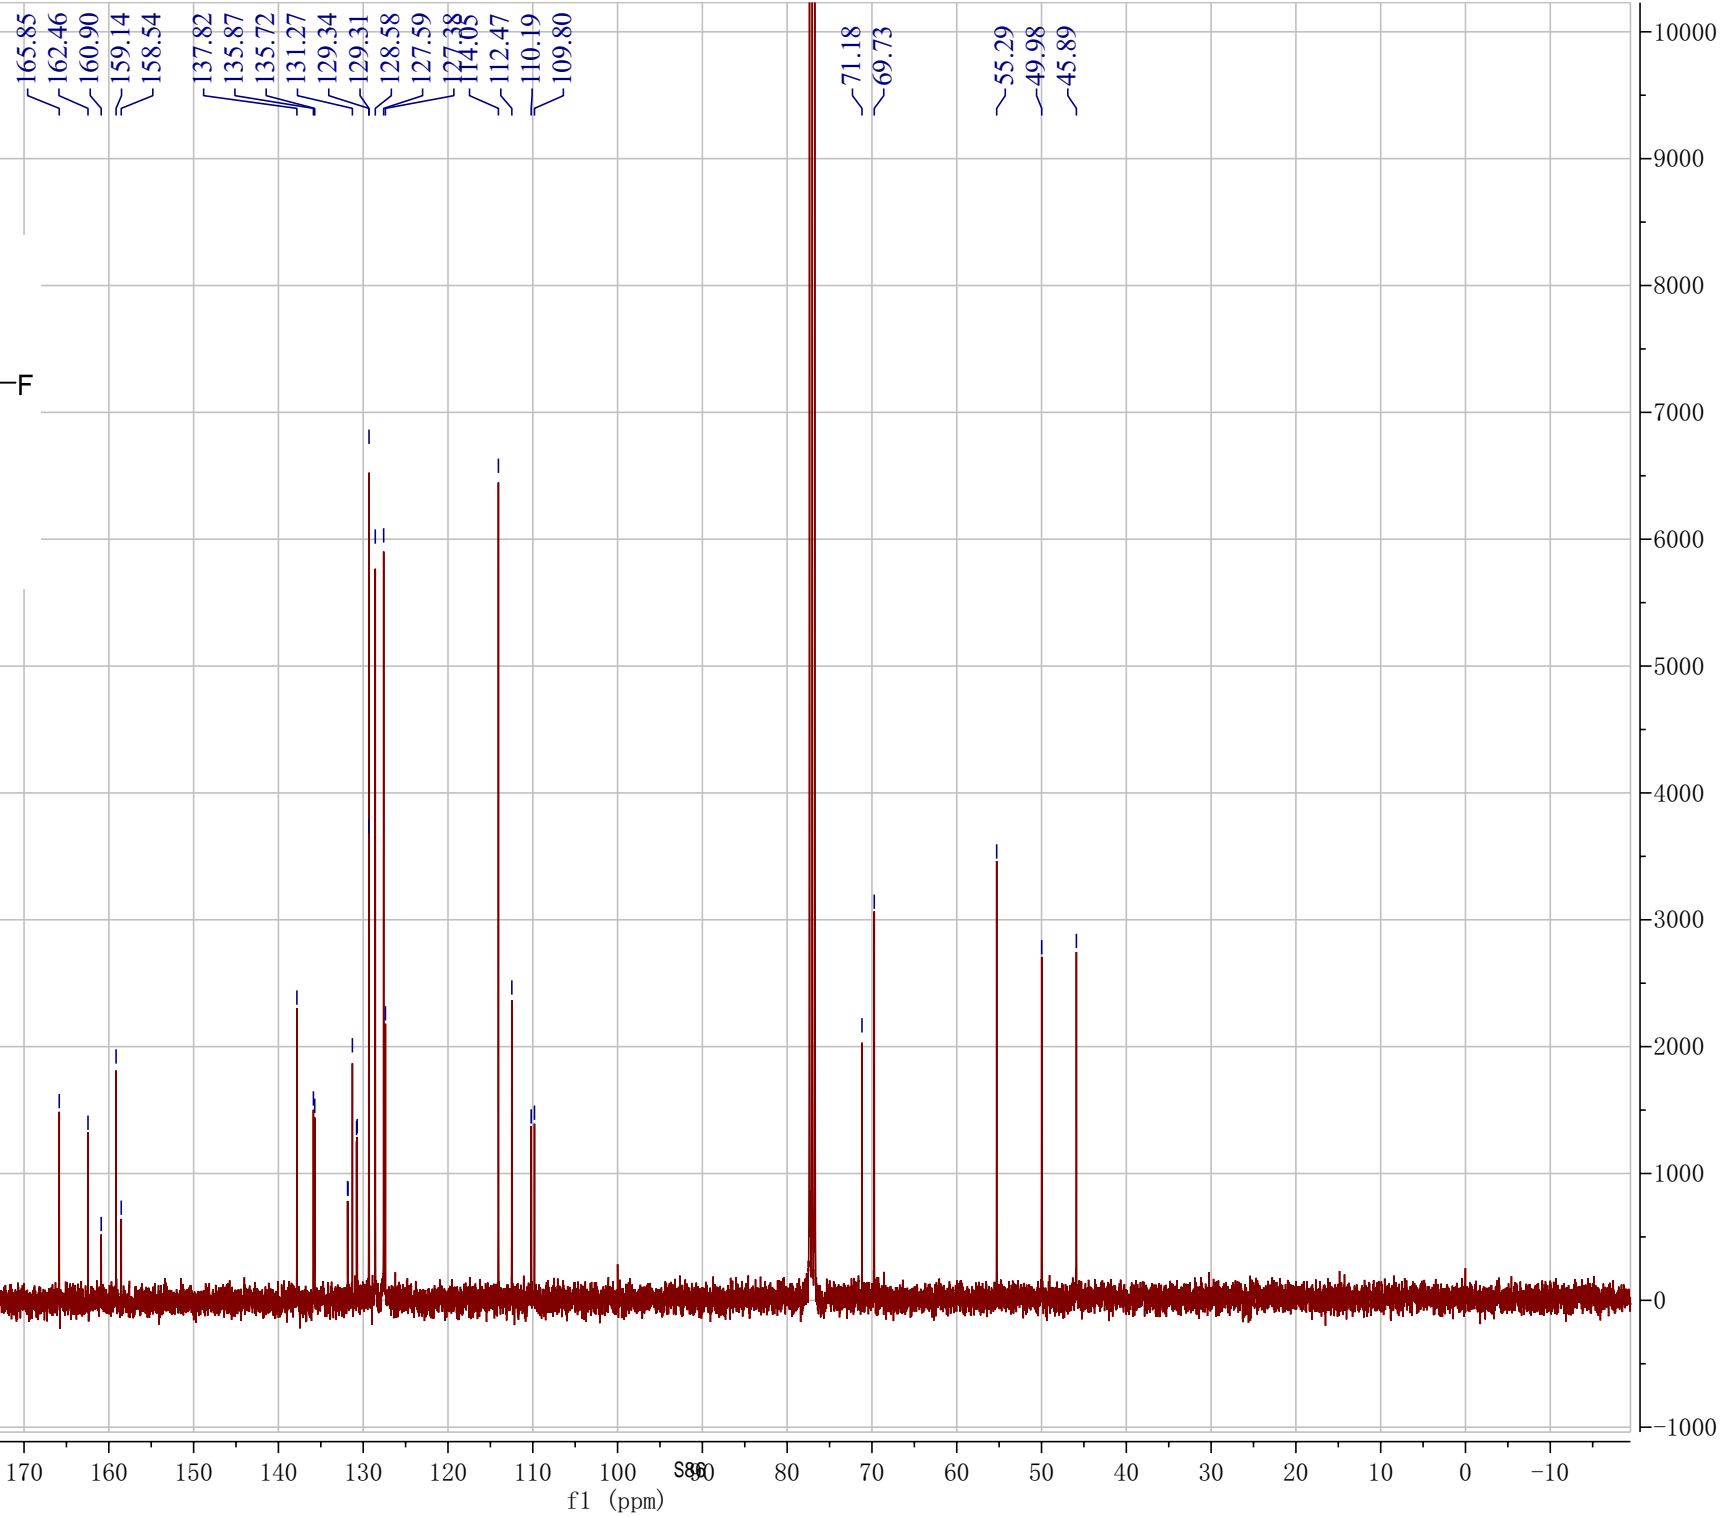

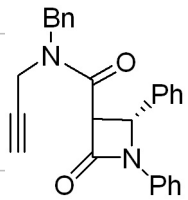

7  
<sup>1</sup>H NMR  
400M, CDCl<sub>3</sub>

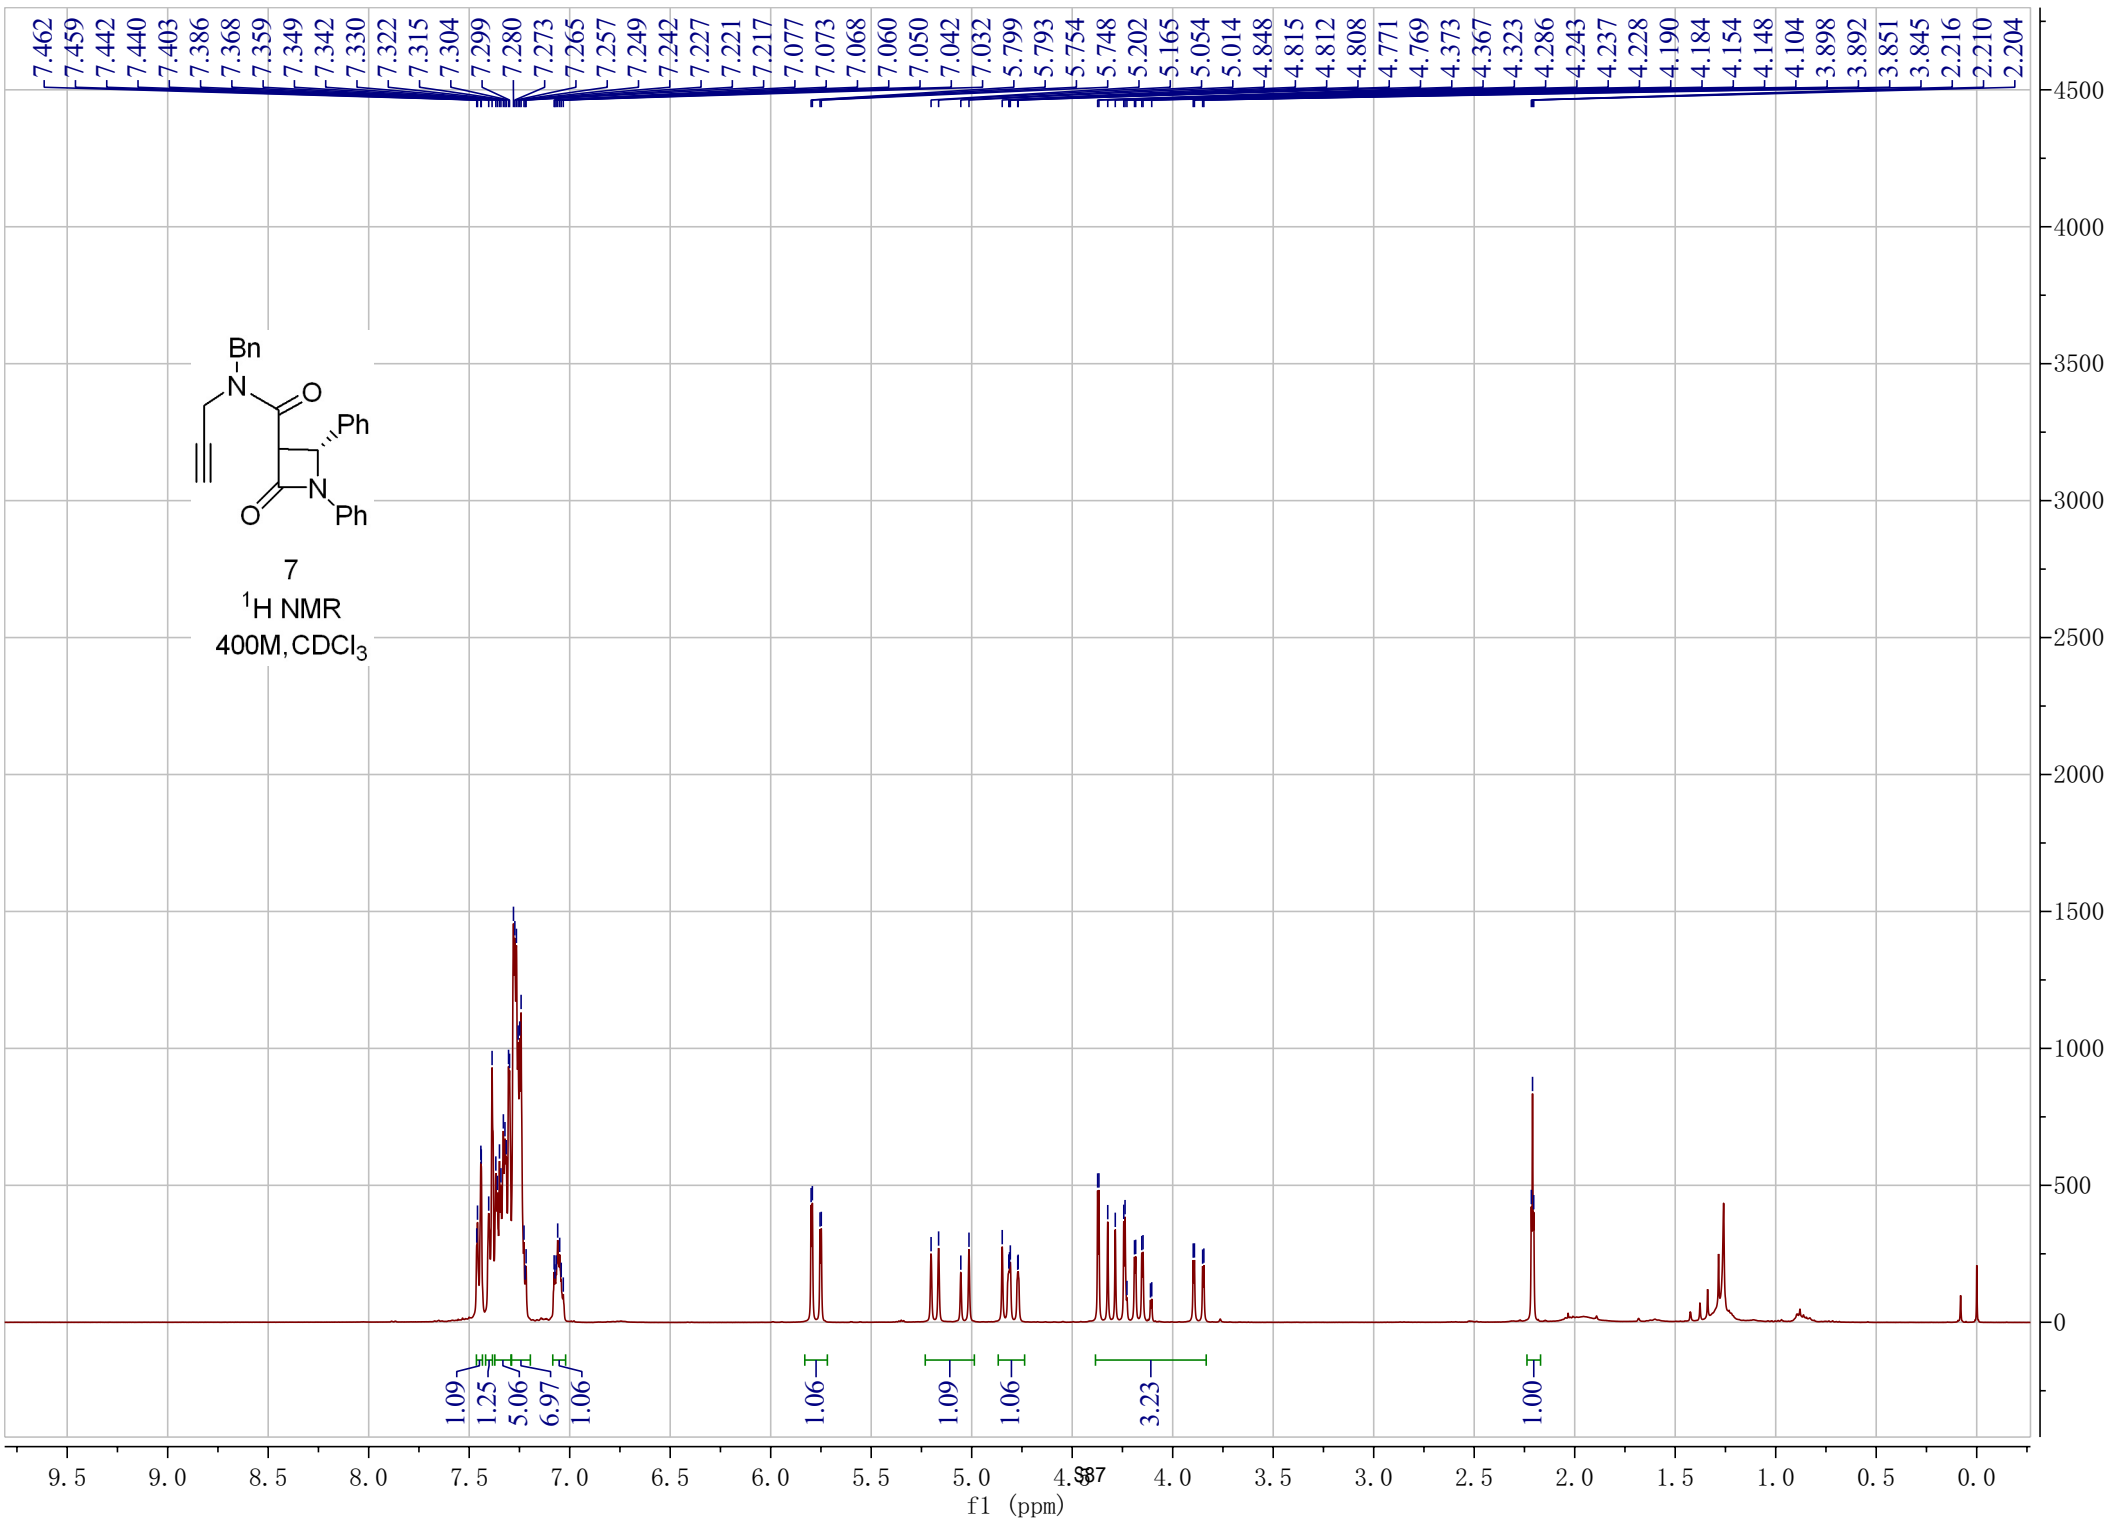

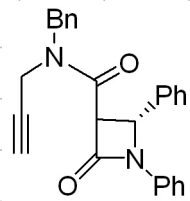

7

<sup>13</sup>C NMR  
100MHz CDCl<sub>3</sub>

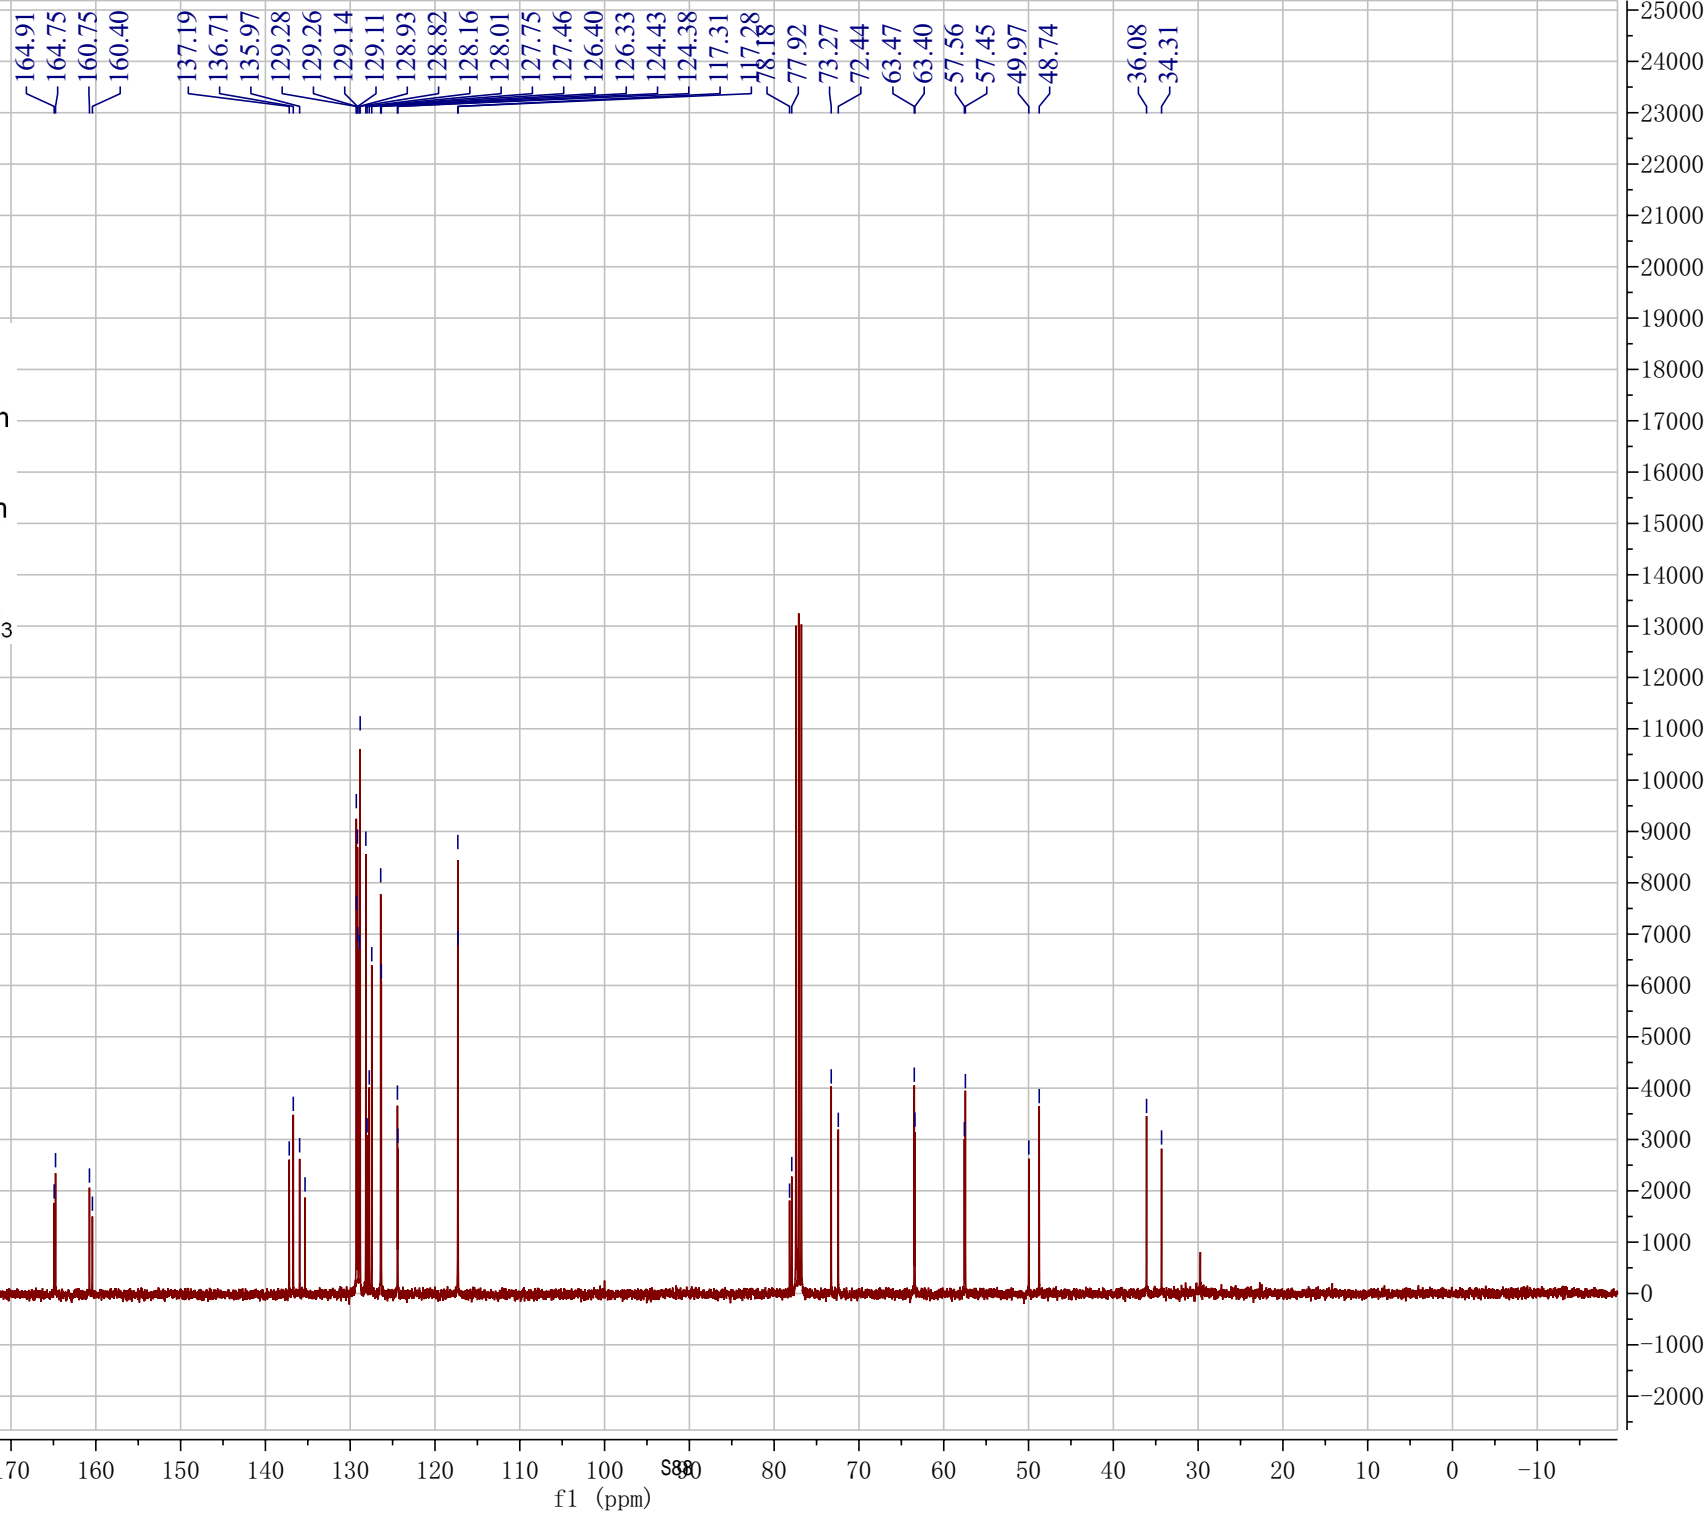



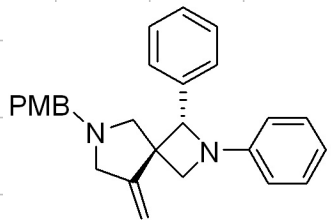

4

<sup>1</sup>H NMR  
400MHz CDCl<sub>3</sub>

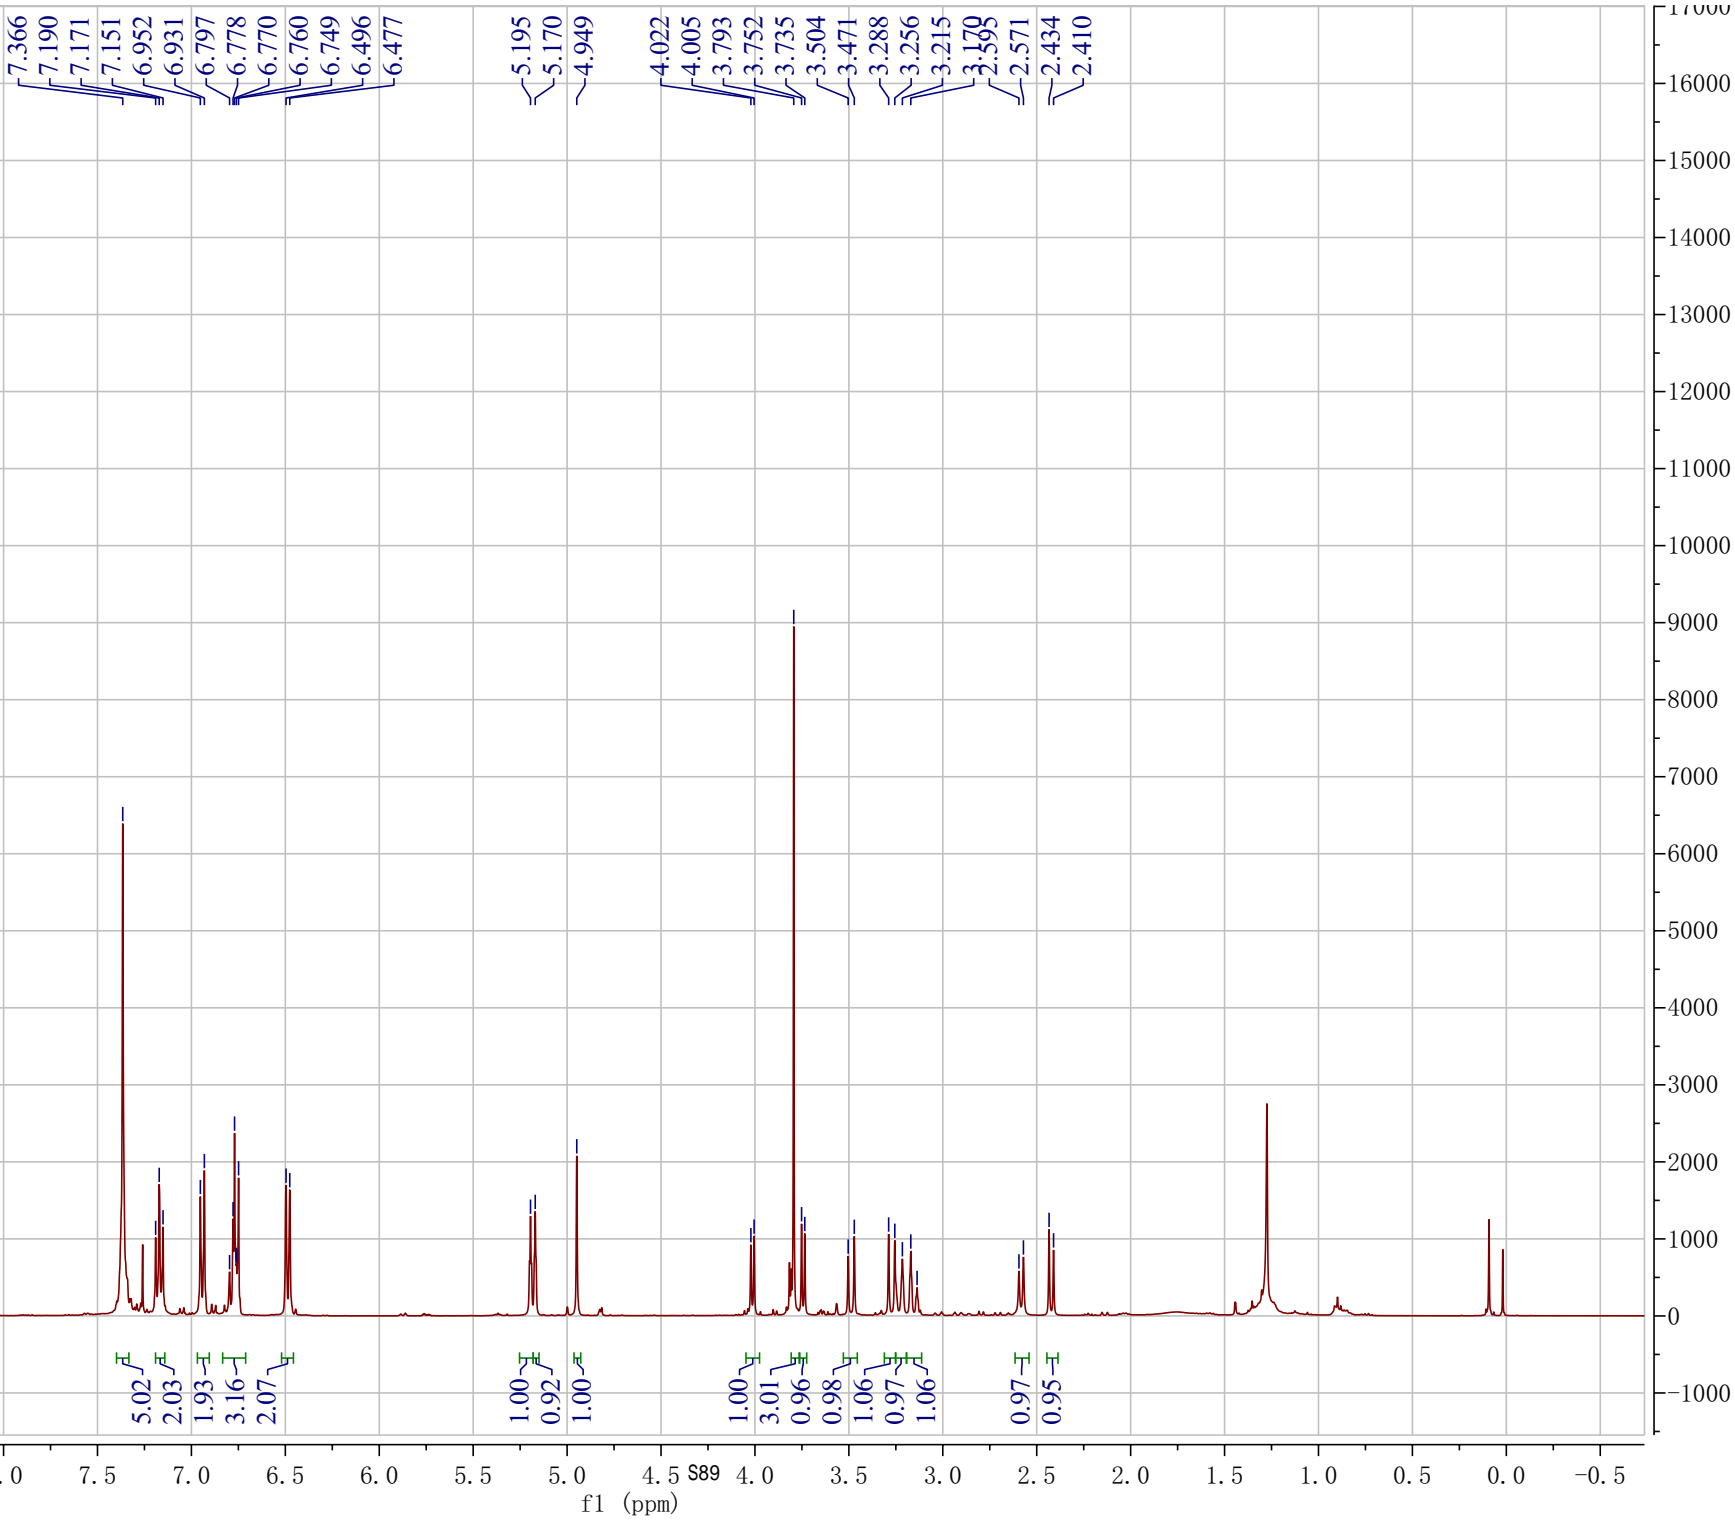

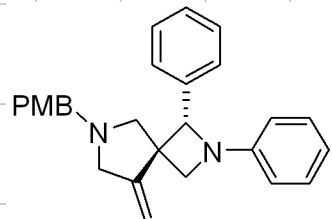

4

$^1\text{H}$  NMR  
400MHz  $\text{CDCl}_3$

158.45  
151.75  
138.70  
129.33  
128.86  
128.31  
126.72  
118.36  
113.55  
112.92  
106.52  
63.28  
61.52  
59.53  
59.29  
55.25  
49.83  
29.74

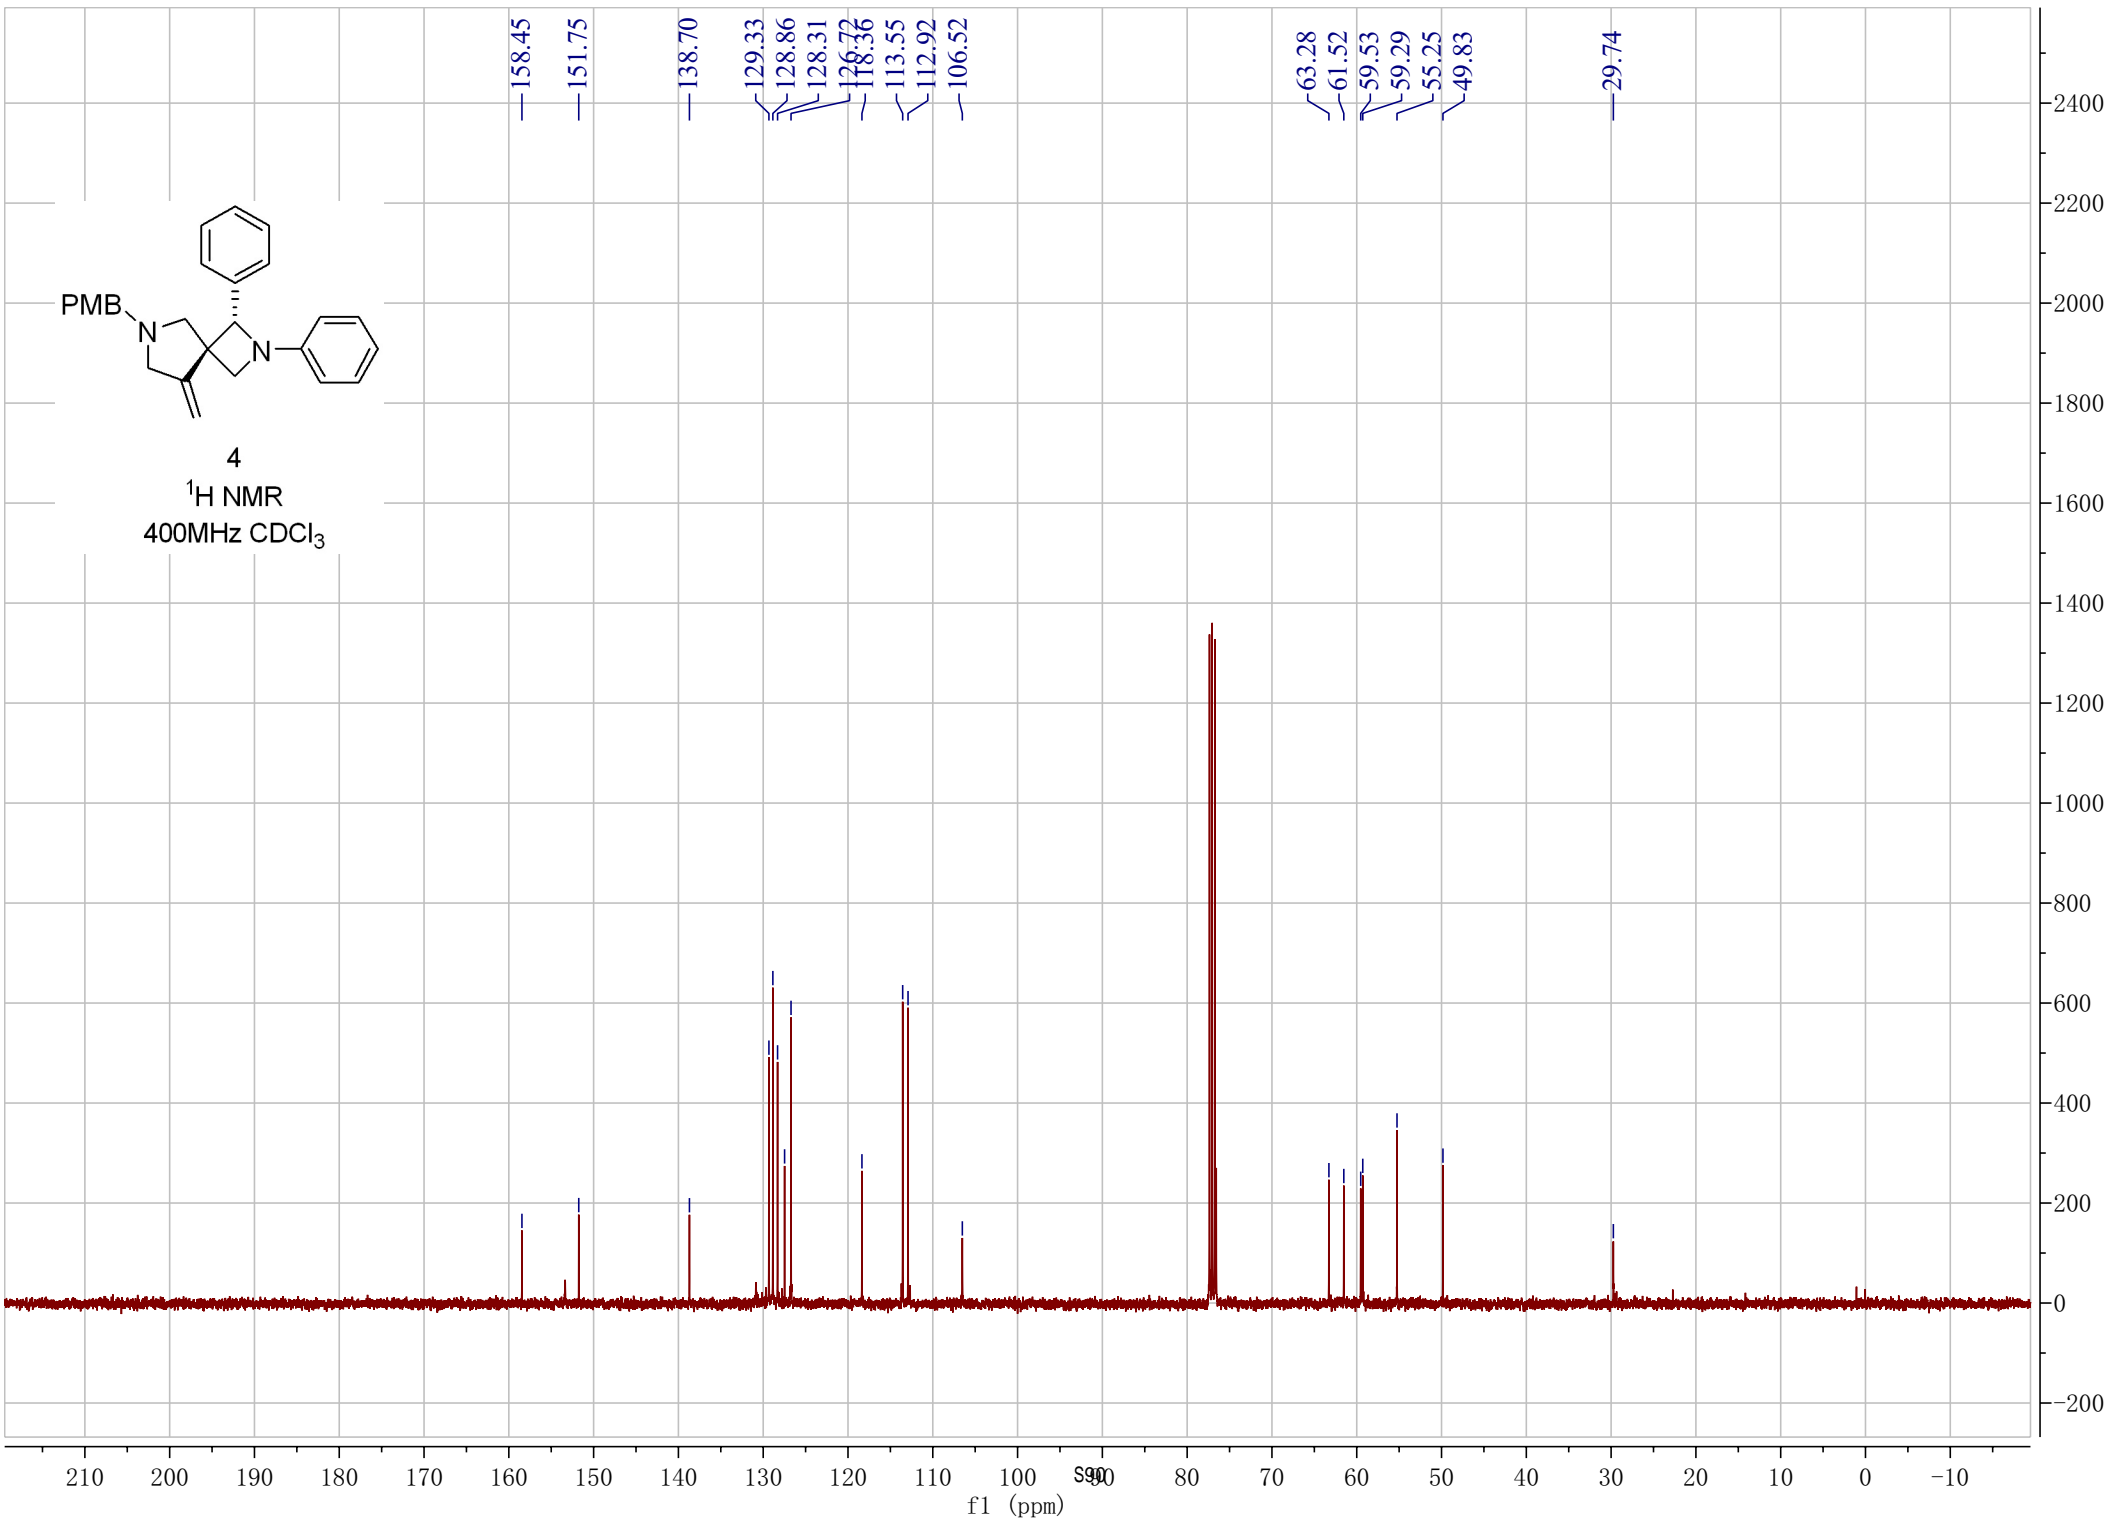

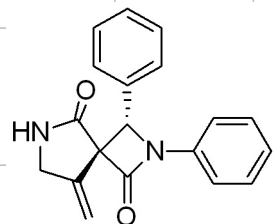

5  
<sup>1</sup>H NMR  
400M, CDCl<sub>3</sub>

8.094  
7.372  
7.352  
7.333  
7.319  
7.286  
7.278  
7.143  
7.125

5.459  
5.404

3.988  
3.952  
3.936  
3.900

1.00

9.12

1.05

2.00

0.98

2.00

f1 (ppm)

9000  
8000  
7000  
6000  
5000  
4000  
3000  
2000  
1000  
0

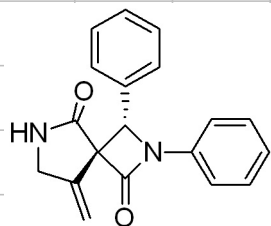

5  
<sup>13</sup>CNMR  
100M, CDCl<sub>3</sub>

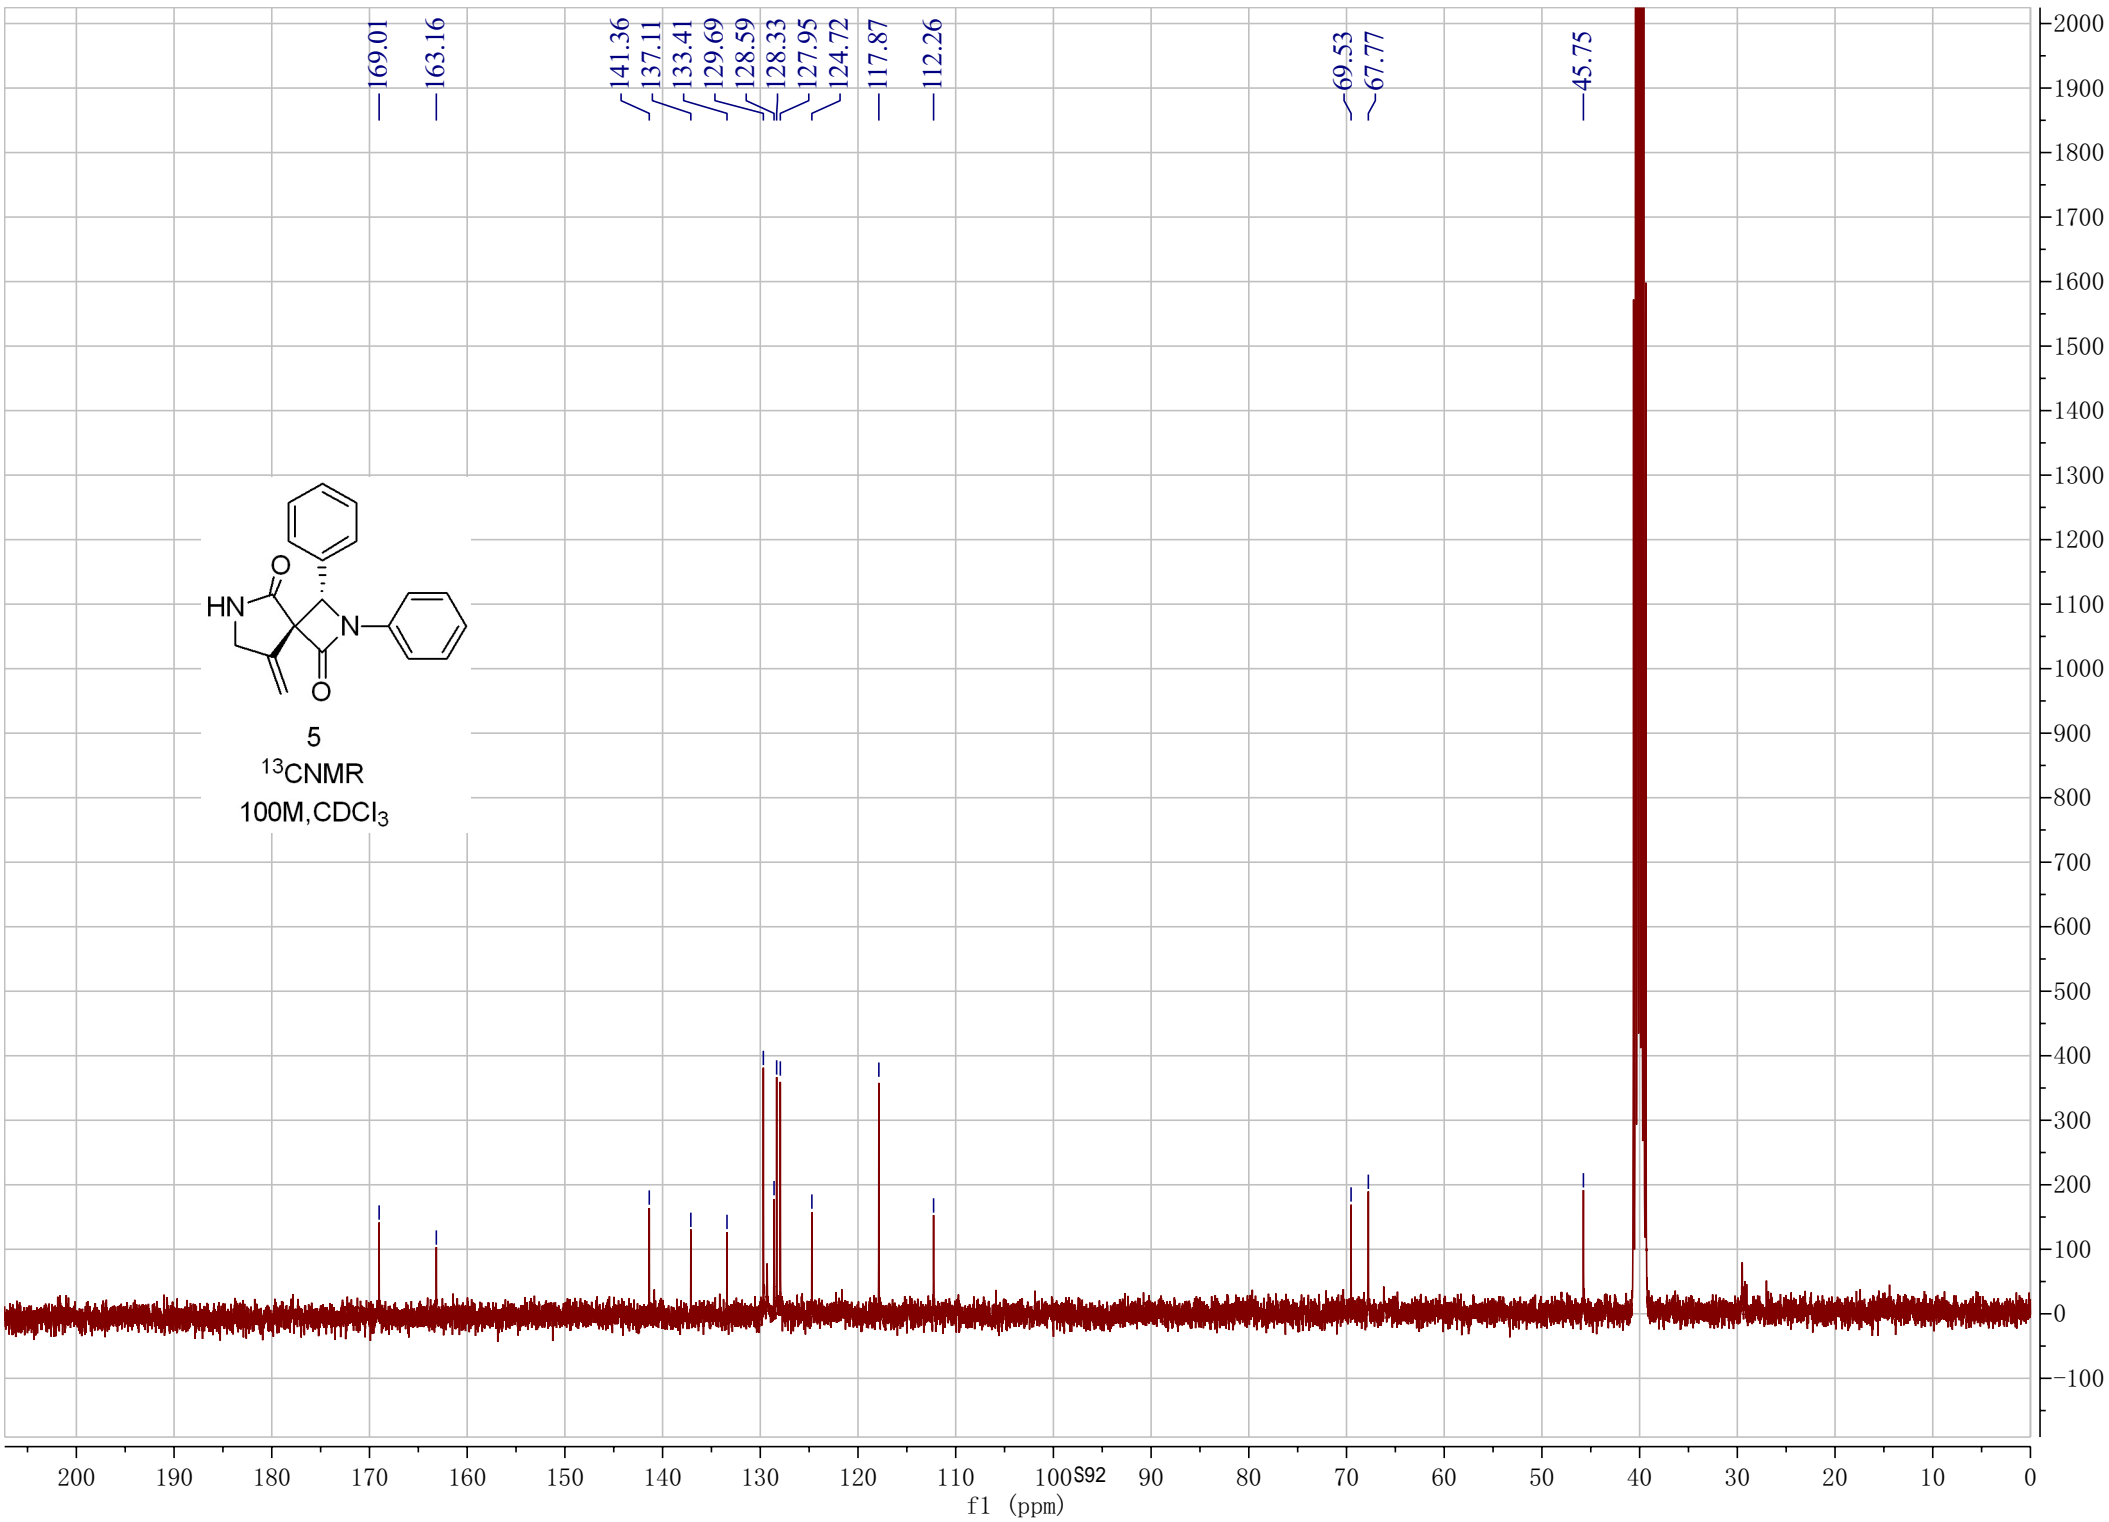

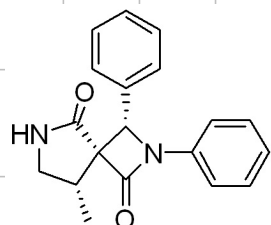

6

$^1\text{H NMR}$   
400M,  $\text{CDCl}_3$

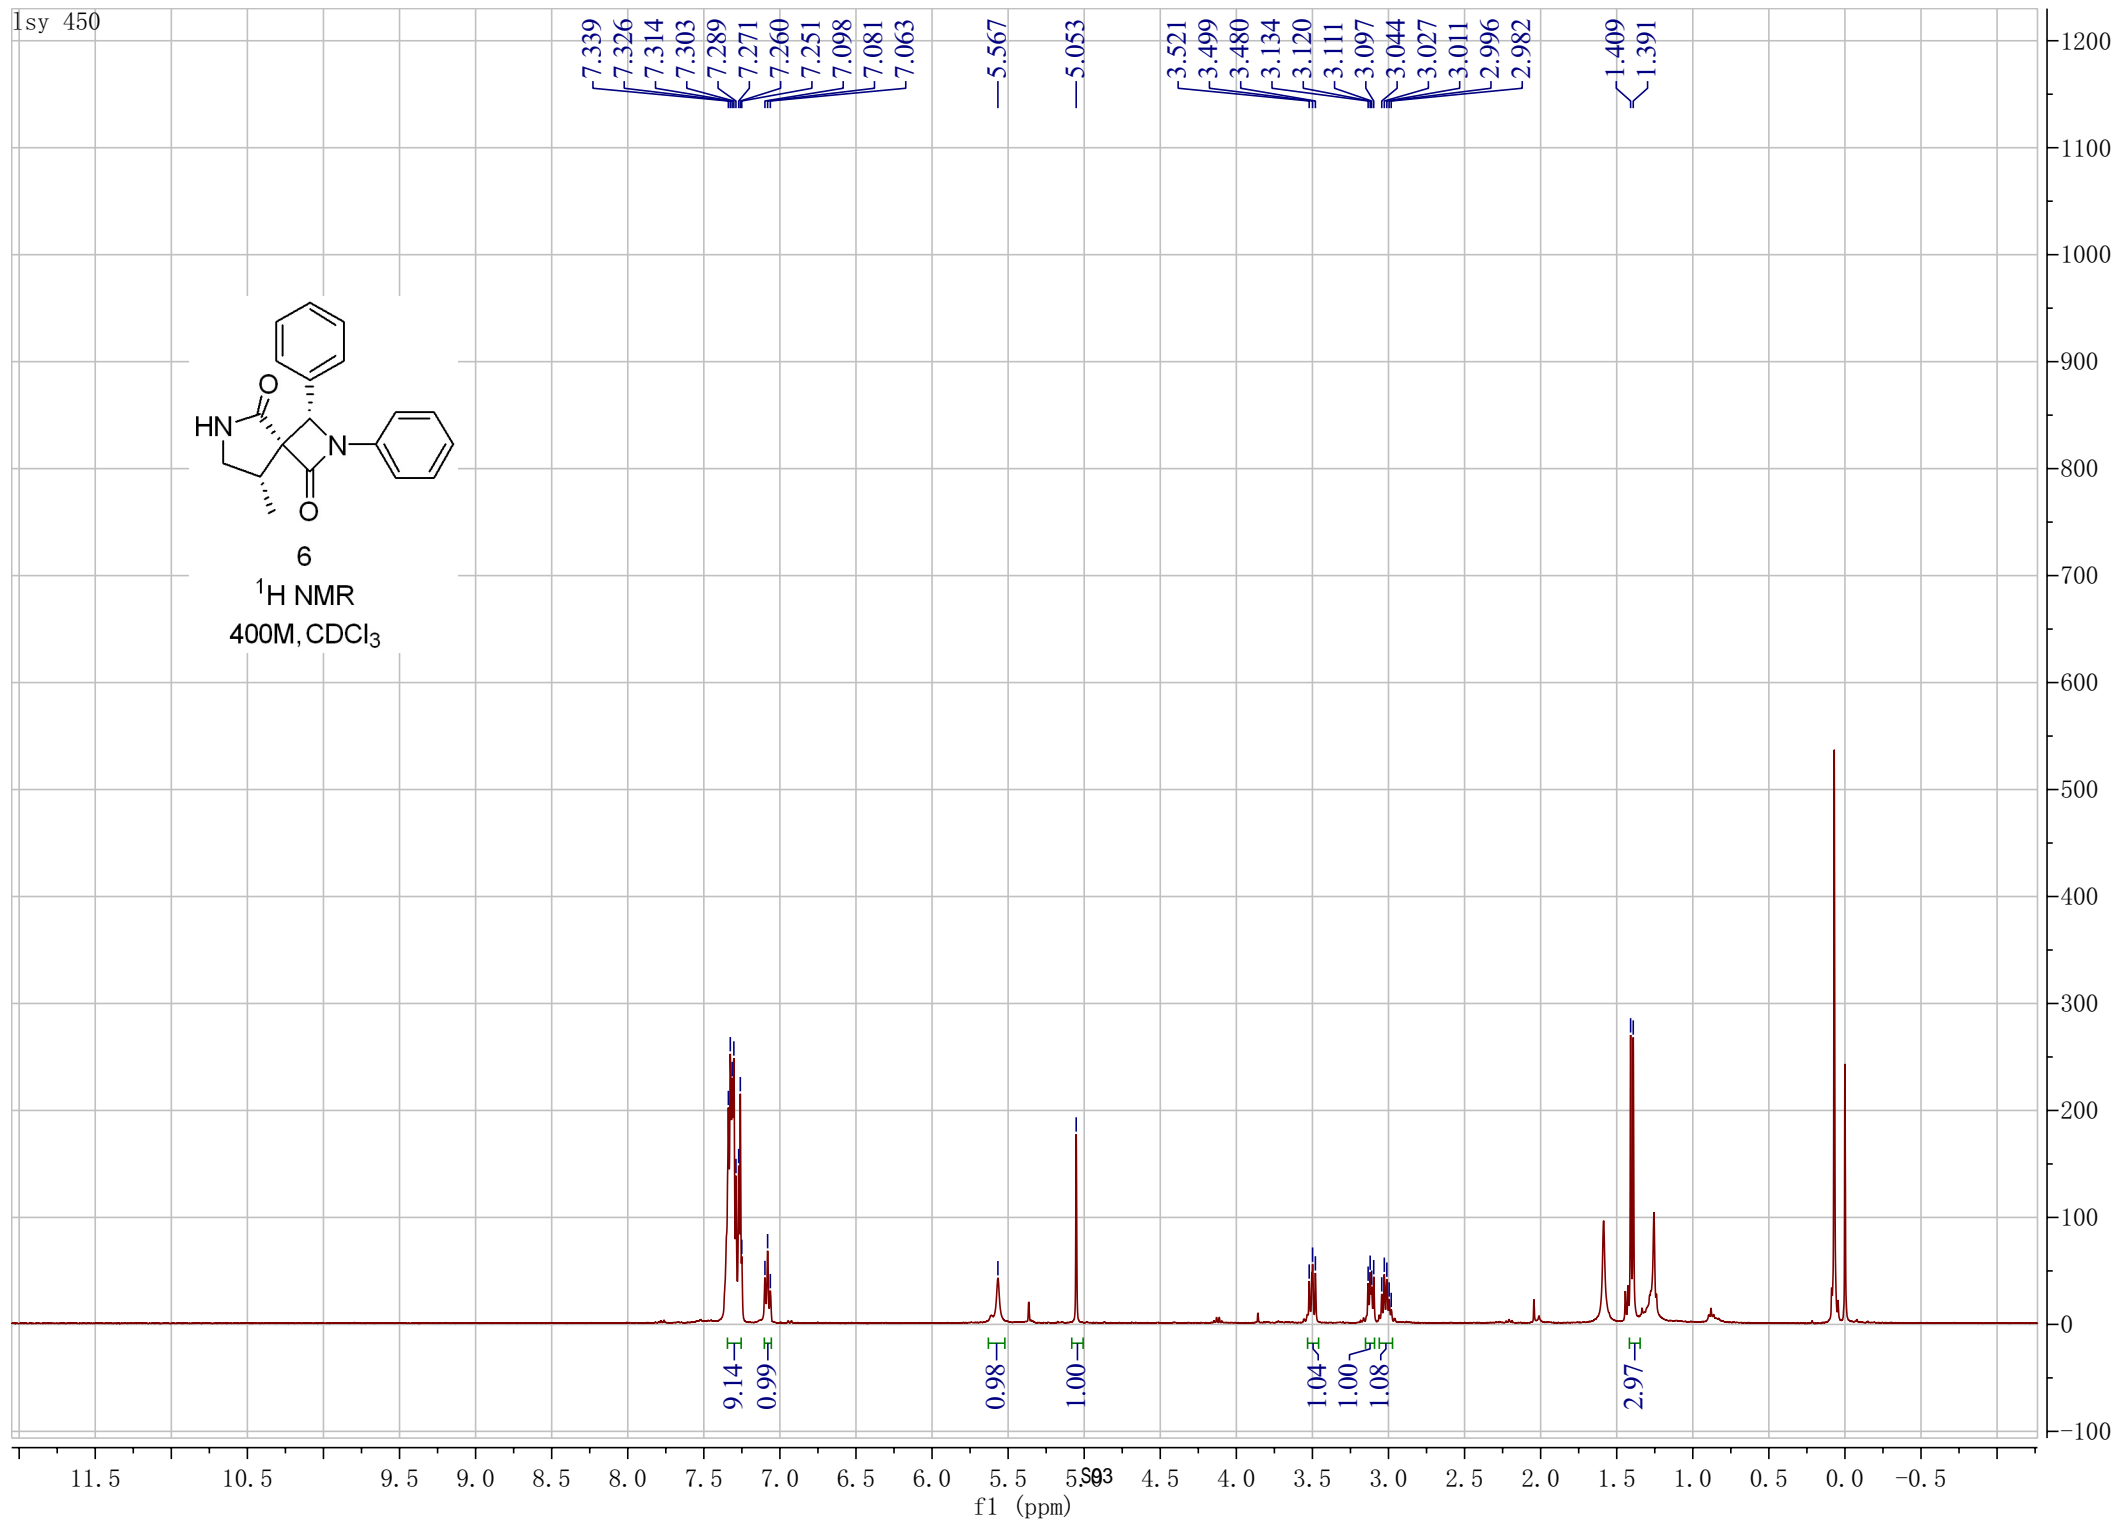

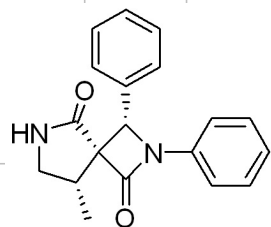

6

<sup>13</sup>CNMR  
100M, CDCl<sub>3</sub>

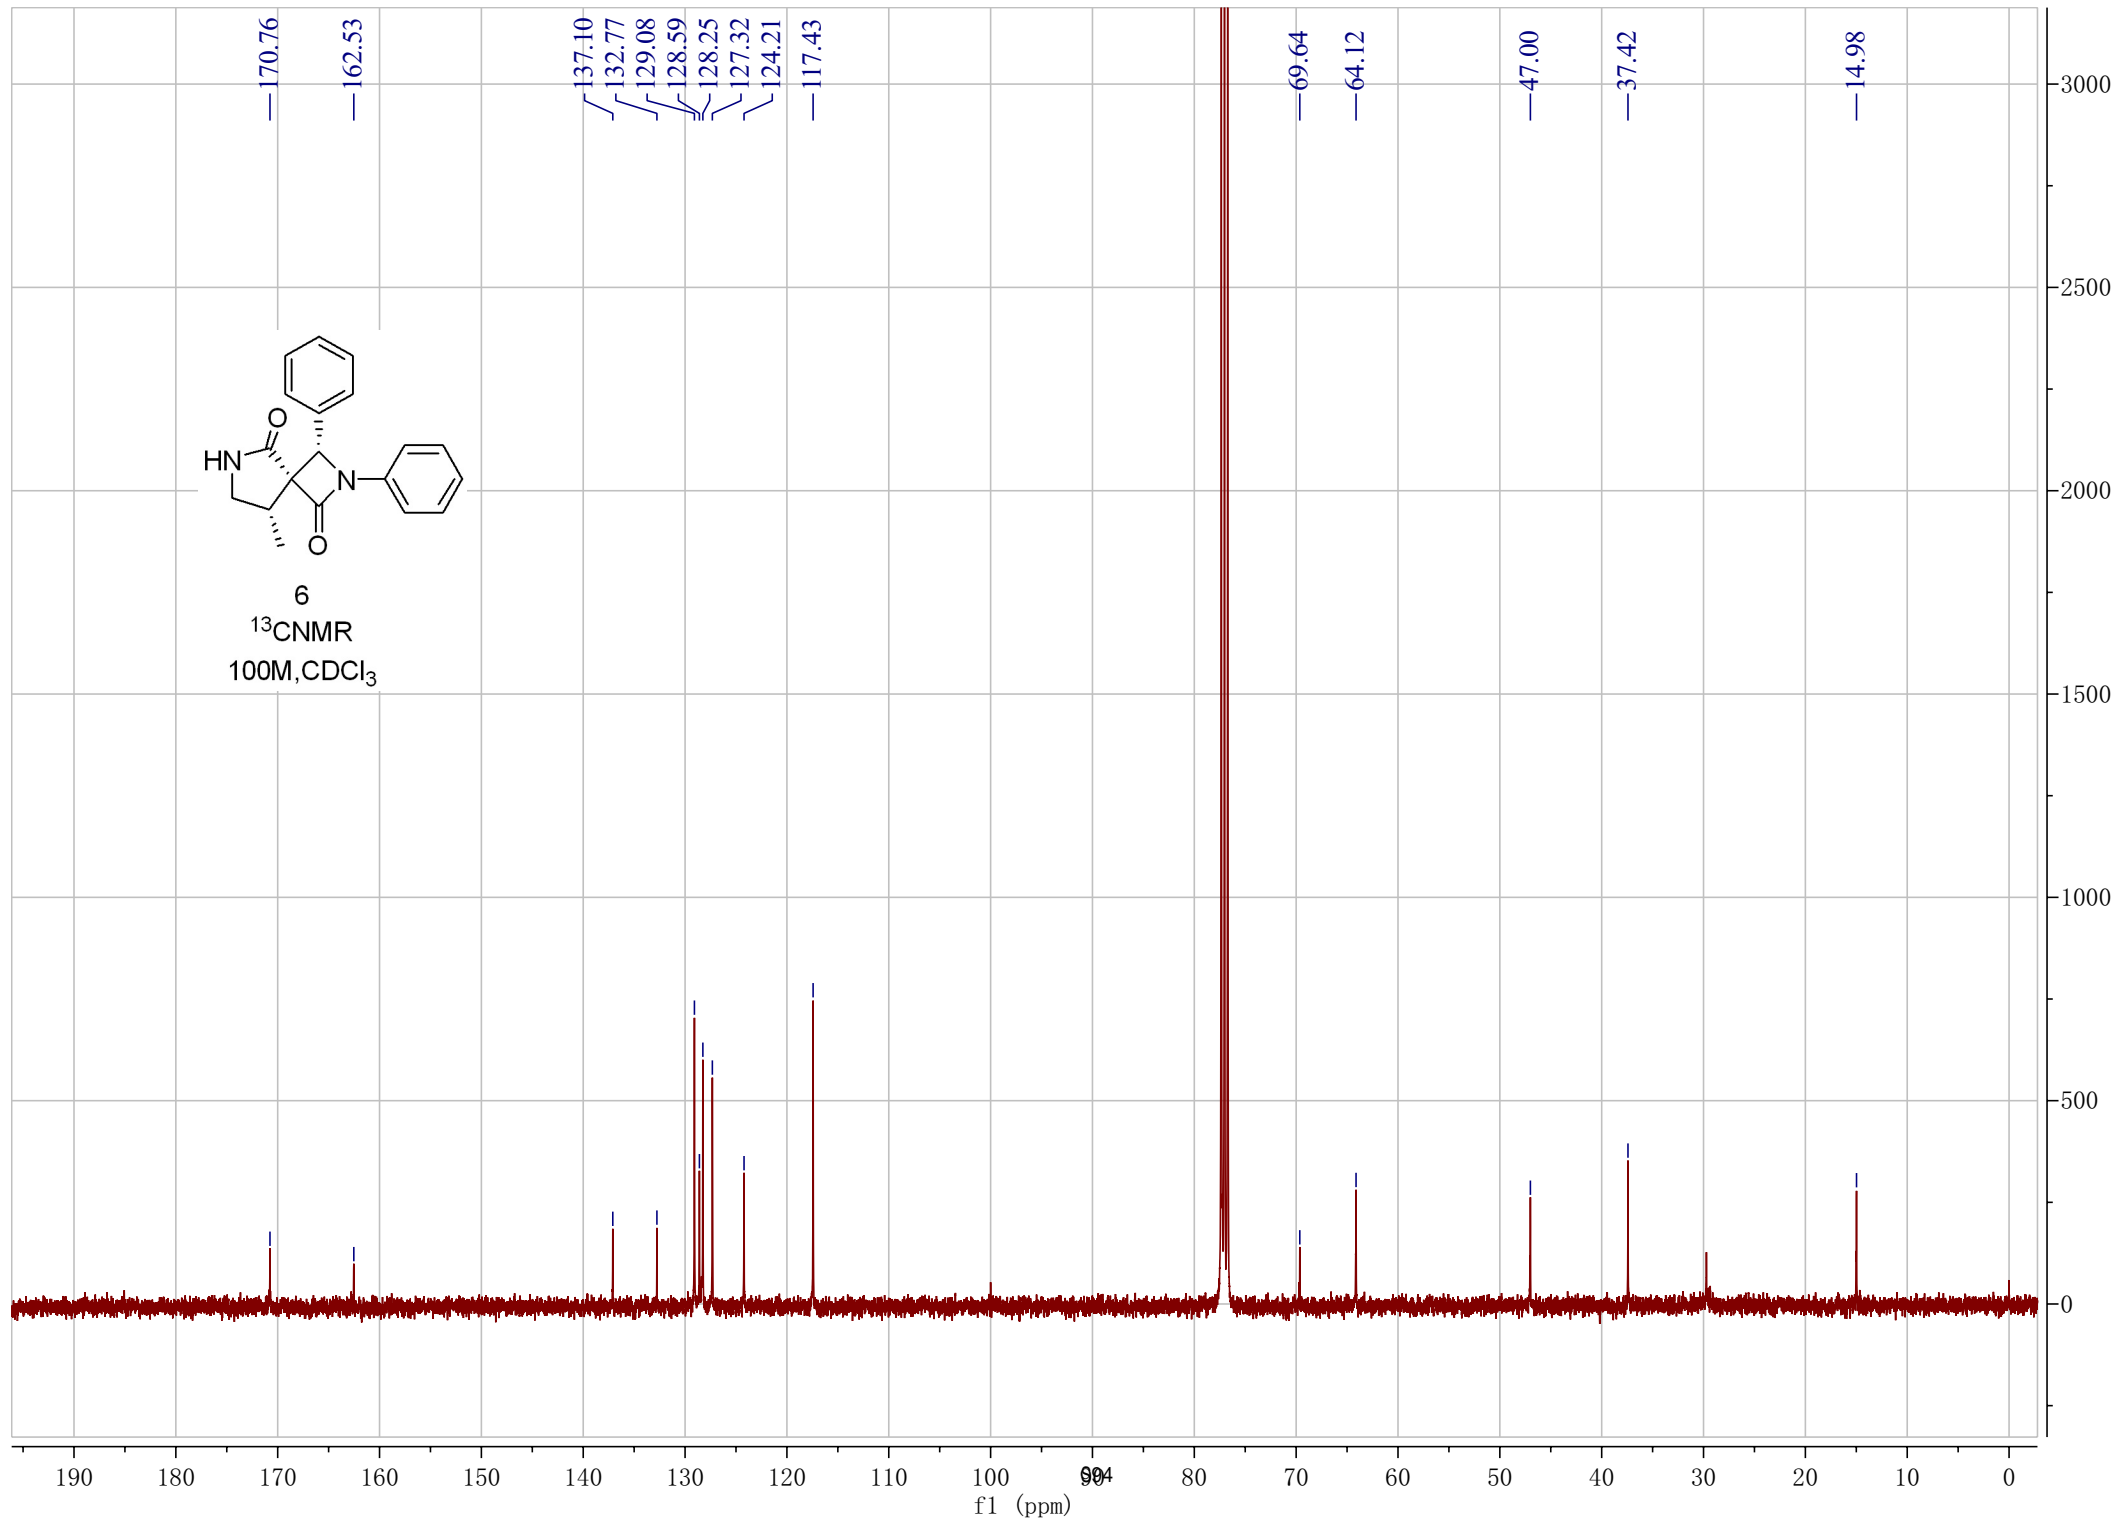

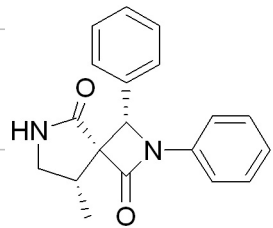

6

NOESY  
400M, CDCl<sub>3</sub>

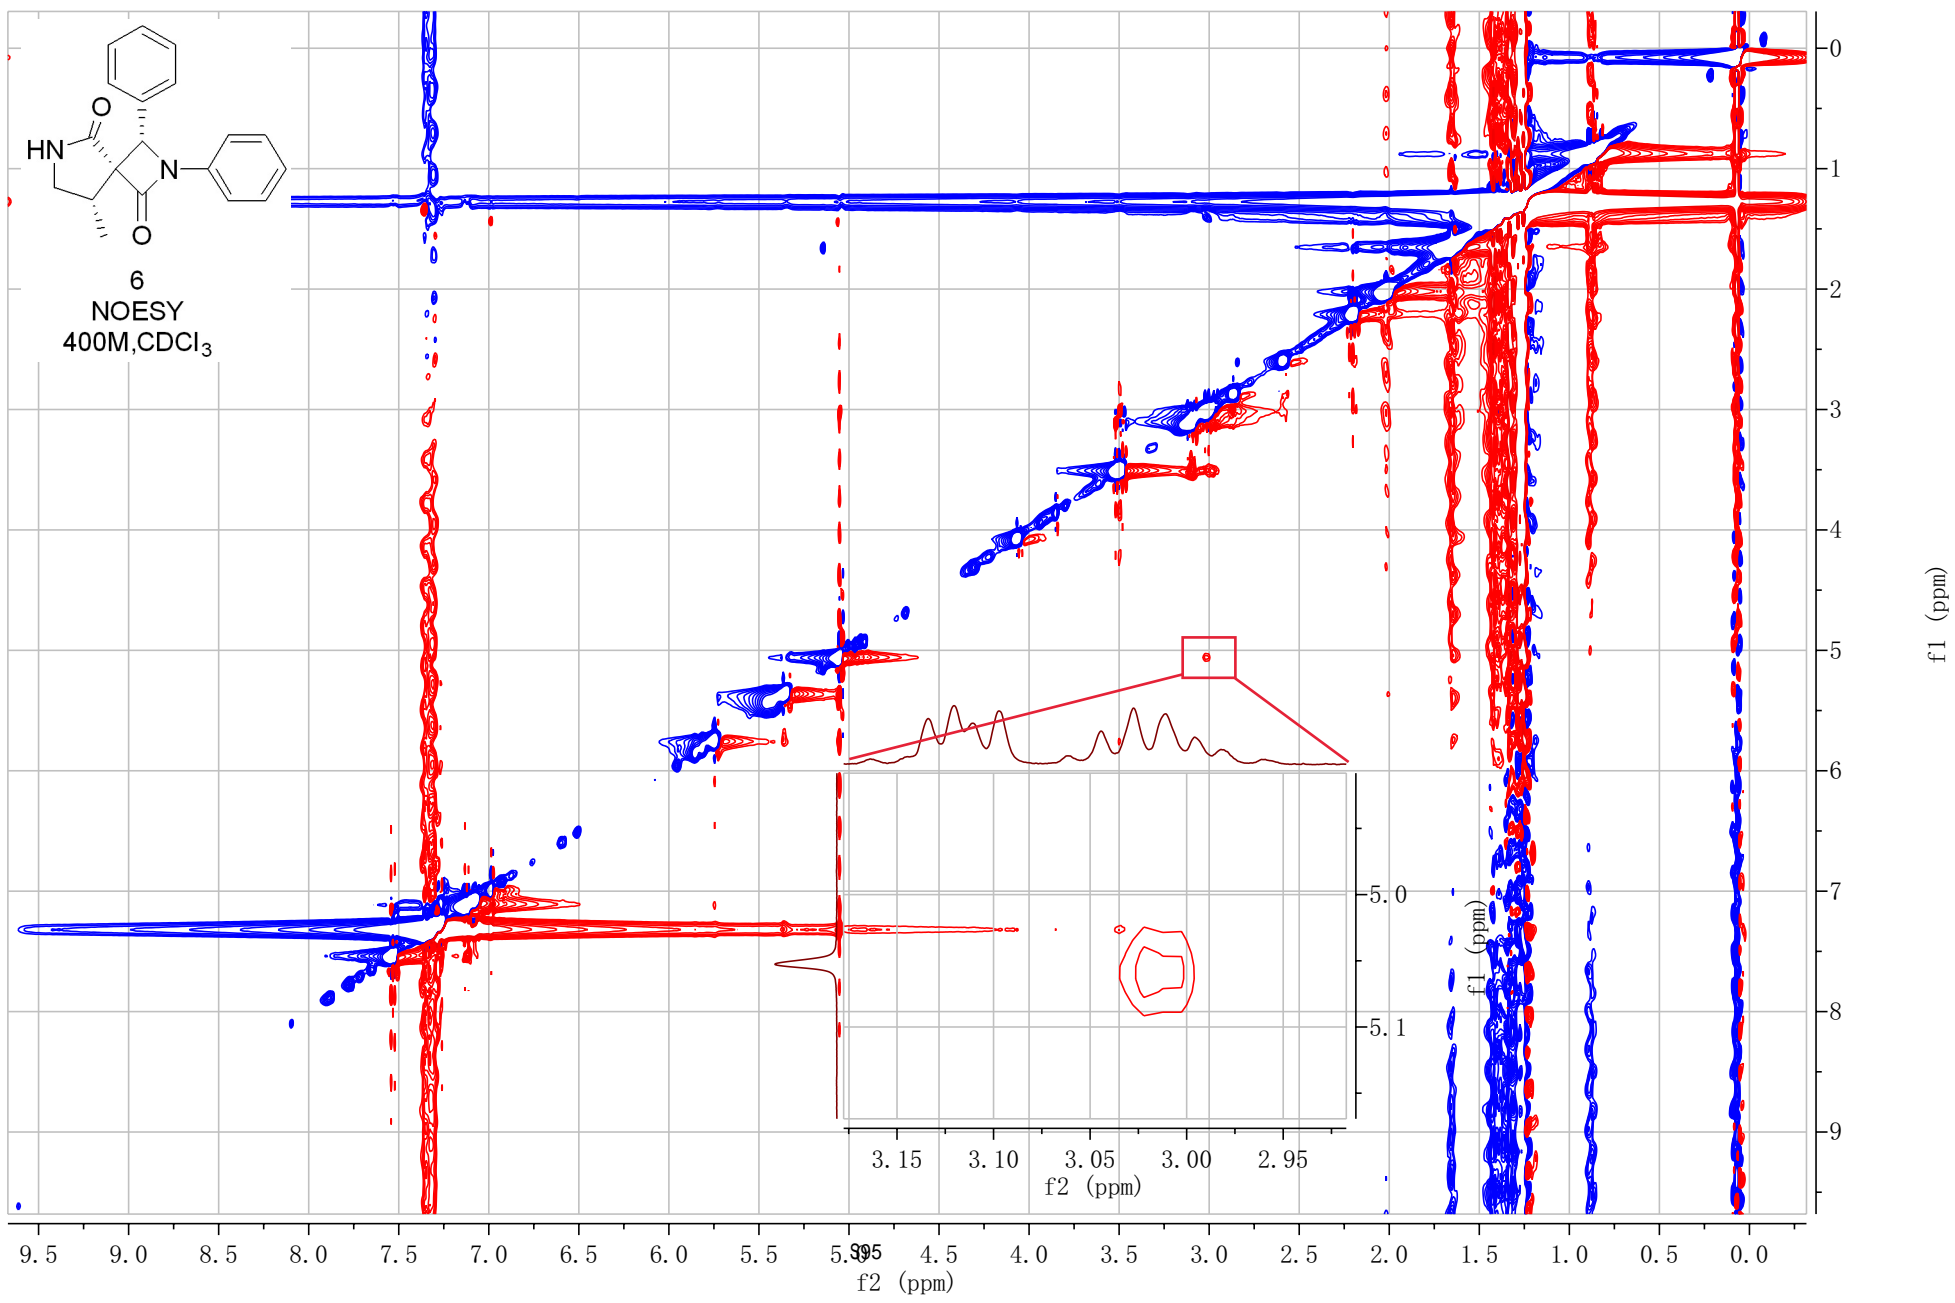

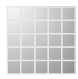

SHIMADZU

LabSolutions

## HPLC Replot

## &lt;Sample Information&gt;

Sample name : Isy-Bn-X-0701-AS20%

Data name : Isy-Bn-X-0701-AS20%.lcd

Acq. name : AS-H-20%.lcm

Location : 1-1  
: 1 uL

Sample Type : unknown

Ana. Date : 2023/7/1 10:56:48

Analyst : System Administrator

Pro. Date : 2023/7/1 11:18:32

Processor : System Administrator

mV

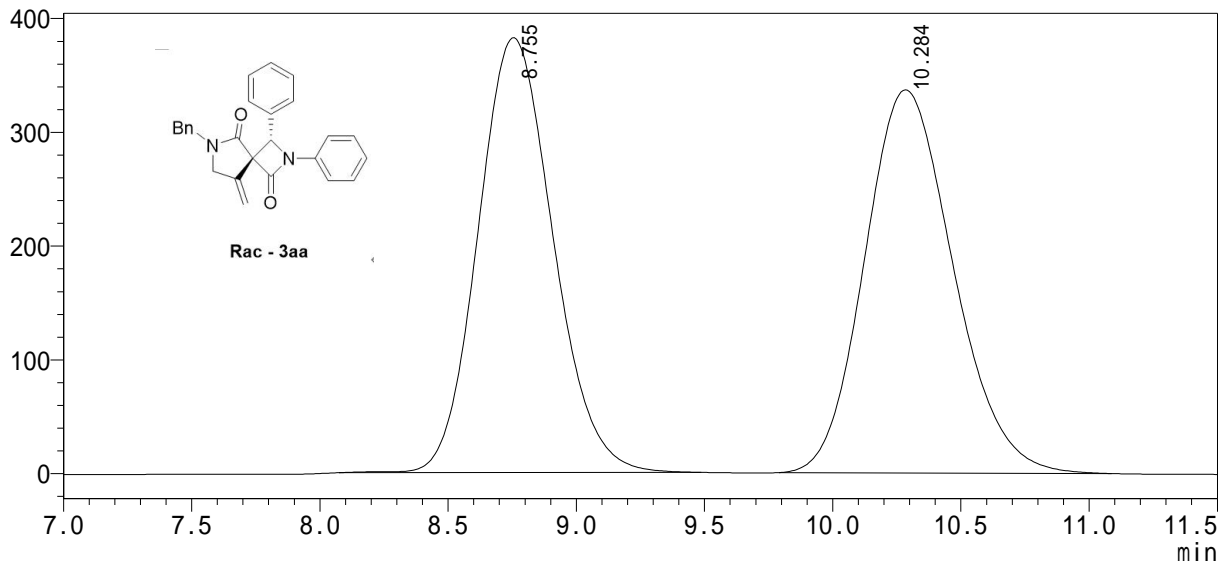

SPD-20A

| Entry | RT[min] | Area     | Height | Area%  |  |   |  |
|-------|---------|----------|--------|--------|--|---|--|
| 1     | 8.755   | 7771542  | 382132 | 49.011 |  | M |  |
| 2     | 10.284  | 8085096  | 336711 | 50.989 |  | M |  |
| Sum   |         | 15856639 | 718843 |        |  |   |  |





SHIMADZU

LabSolutions

## HPLC Replot

## &lt;Sample Information&gt;

Sample name : LSY-0711-L23-Bn-AS20%

Data name : LSY-0711-L23-Bn-AS20%.lcd

Acq. name : AS-H-20%.lcm

Location : 1-1  
: 1 uL

Sample Type : unknown

Ana. Date : 2023/7/11 21:35:04

Analyst : System Administrator

Pro. Date : 2023/7/14 16:38:00

Processor : System Administrator

mV

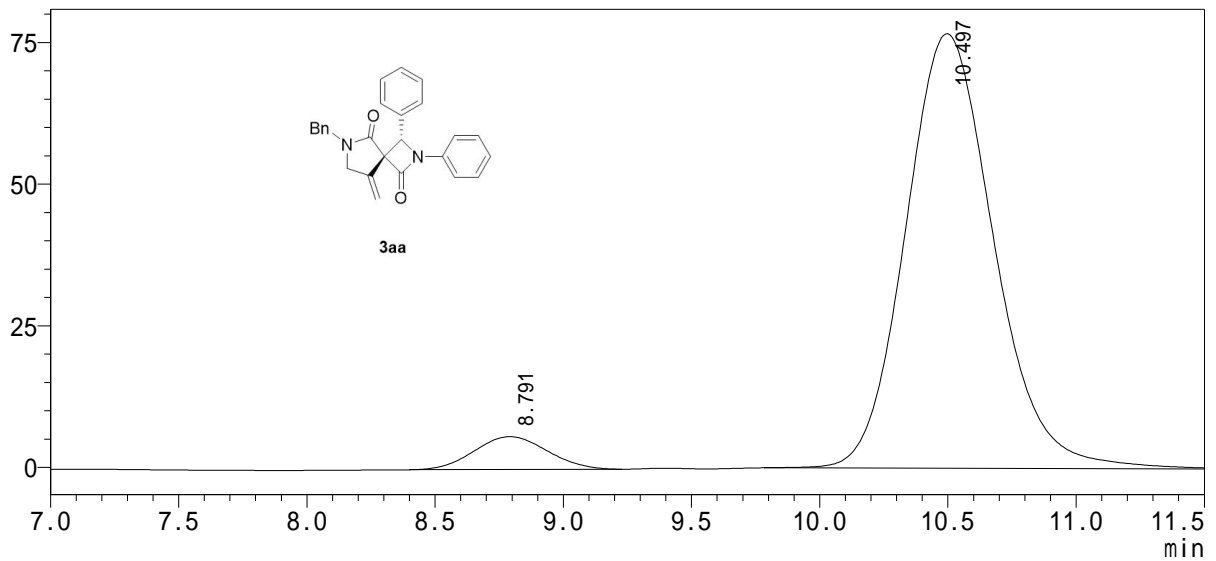

SPD-20A

| Entry | RT[min] | Area    | Height | Area%  |  |   |  |
|-------|---------|---------|--------|--------|--|---|--|
| 1     | 8.791   | 114070  | 5791   | 5.857  |  | M |  |
| 2     | 10.497  | 1833433 | 76706  | 94.143 |  | M |  |
| Sum   |         | 1947502 | 82498  |        |  |   |  |

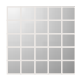

SHIMADZU

LabSolutions

## HPLC Replot

## &lt;Sample Information&gt;

Sample name : LSY0-0708-AS20%

Data name : LSY0-0708-AS20%.lcd

Acq. name : AS-H-20%.lcm

Location : 1-1  
: 1 uL

Sample Type : unknown

Ana. Date : 2023/7/8 20:07:17

Analyst : System Administrator

Pro. Date : 2024/7/8 9:04:37

Processor : System Administrator

mV

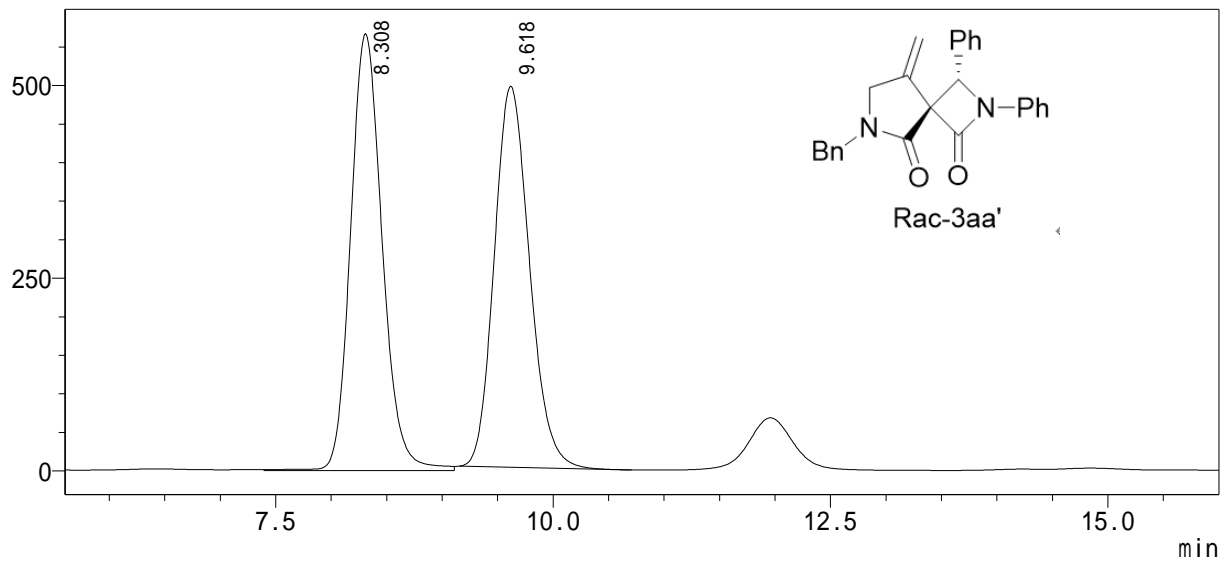

SPD-20A

| Entry | RT[min] | Area     | Height  | Area%  |  |   |  |
|-------|---------|----------|---------|--------|--|---|--|
| 1     | 8.308   | 11253183 | 567000  | 50.758 |  |   |  |
| 2     | 9.618   | 10916930 | 494375  | 49.242 |  | M |  |
| Sum   |         | 22170113 | 1061376 |        |  |   |  |



SHIMADZU

LabSolutions

## HPLC Replot

## &lt;Sample Information&gt;

Sample name : LSY-Bn-118-B1-AS20%-0705

Data name : LSY-Bn-118-B1-AS20%-0705.lcd

Acq. name : AS-H-20%.lcm

Location : 1-1  
: 1 uL

Sample Type : unknown

Ana. Date : 2023/7/5 19:18:27

Analyst : System Administrator

Pro. Date : 2024/7/9 11:30:46

Processor : System Administrator

mV

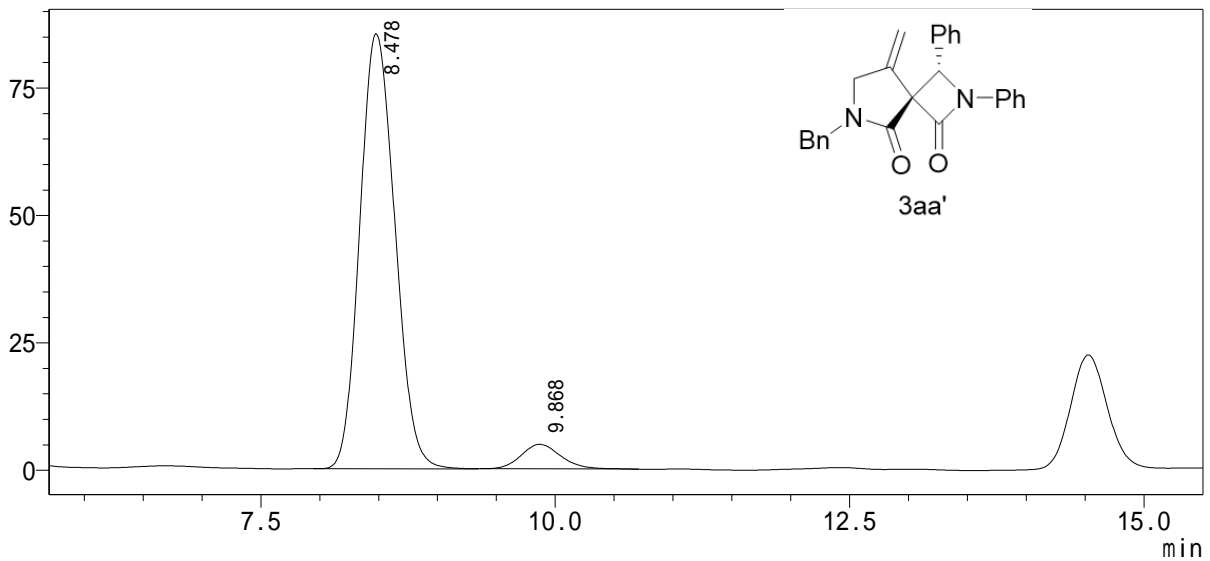

SPD-20A

| Entry | RT[min] | Area    | Height | Area%  |   |  |
|-------|---------|---------|--------|--------|---|--|
| 1     | 8.478   | 1770862 | 85362  | 93.995 |   |  |
| 2     | 9.868   | 113127  | 4832   | 6.005  | M |  |
| Sum   |         | 1883989 | 90195  |        |   |  |



SHIMADZU

LabSolutions

## HPLC Replot

## &lt;Sample Information&gt;

Sample name : LSY-0722-PMB-290-1-AS20%

Data name : LSY-0722-PMB-290-1-AS20%.lcd

Acq. name : AS-H-20%.lcm

Location : 1-1  
: 1 uL

Sample Type : unknown

Ana. Date : 2023/7/22 20:02:29

Analyst : System Administrator

Pro. Date : 2024/5/29 15:10:43

Processor : System Administrator

mV

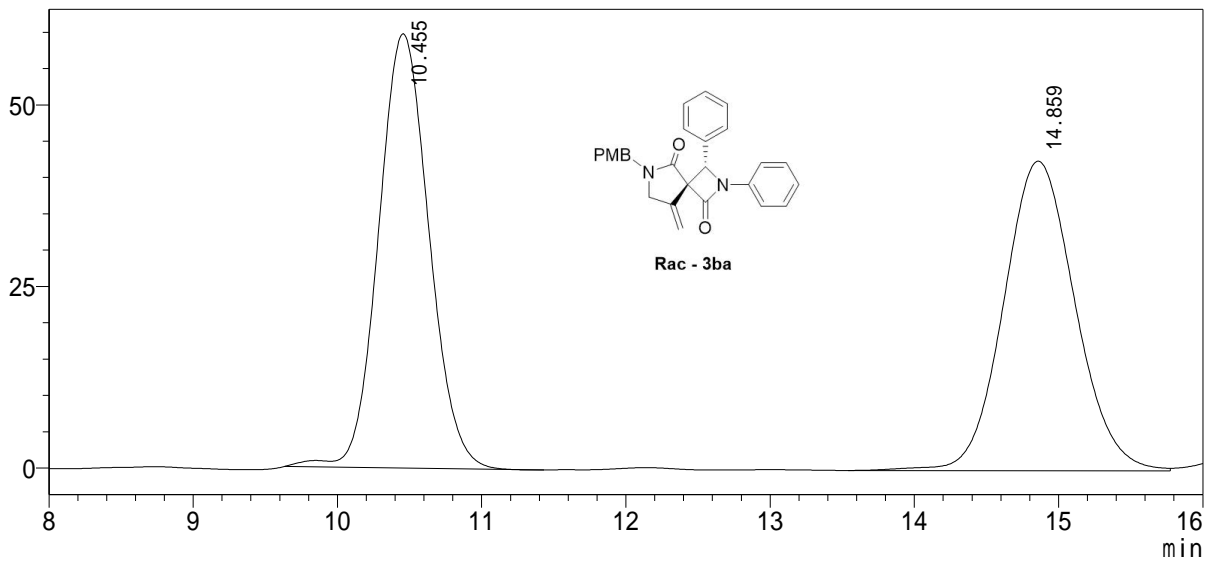

SPD-20A

| Entry | RT[min] | Area    | Height | Area%  |  |   |
|-------|---------|---------|--------|--------|--|---|
| 1     | 10.455  | 1457084 | 59812  | 49.862 |  | M |
| 2     | 14.859  | 1465135 | 42640  | 50.138 |  |   |
| Sum   |         | 2922219 | 102452 |        |  |   |



SHIMADZU

LabSolutions

# HPLC Replot

## <Sample Information>

Sample name : LSY-PMB-0720-289-1-S-AS20%  
Data name : LSY-PMB-0720-289-1-S-AS20%.lcd  
Acq. name : AS-H-20%.lcm  
Location : 1-1  
Sample Type : unknown  
Ana. Date : 2023/7/20 20:57:27  
Pro. Date : 2024/6/25 16:17:34  
Analyst : System Administrator  
Processor : System Administrator

mV

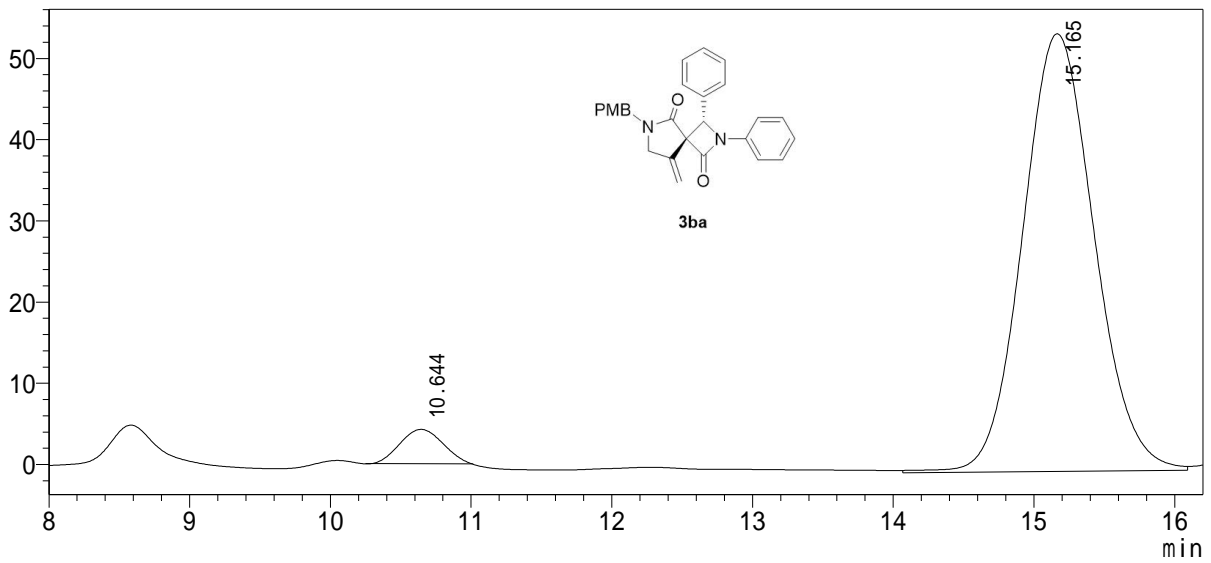

SPD-20A

| Entry | RT[min] | Area    | Height | Area%  |  |   |  |
|-------|---------|---------|--------|--------|--|---|--|
| 1     | 10.644  | 89049   | 4212   | 4.470  |  | M |  |
| 2     | 15.165  | 1902995 | 53896  | 95.530 |  | M |  |
| Sum   |         | 1992044 | 58108  |        |  |   |  |



SHIMADZU

LabSolutions

# HPLC Replot

## <Sample Information>

Sample name : LSY-0725-299-A-AS20%  
Data name : LSY-0725-299-x-AS20%.lcd  
Acq. name : AS-H-20%.lcm  
Location : 1-1  
Sample Type : unknown  
Ana. Date : 2023/7/25 15:02:50  
Analyst : System Administrator  
Pro. Date : 2023/7/25 15:24:18  
Processor : System Administrator

mV

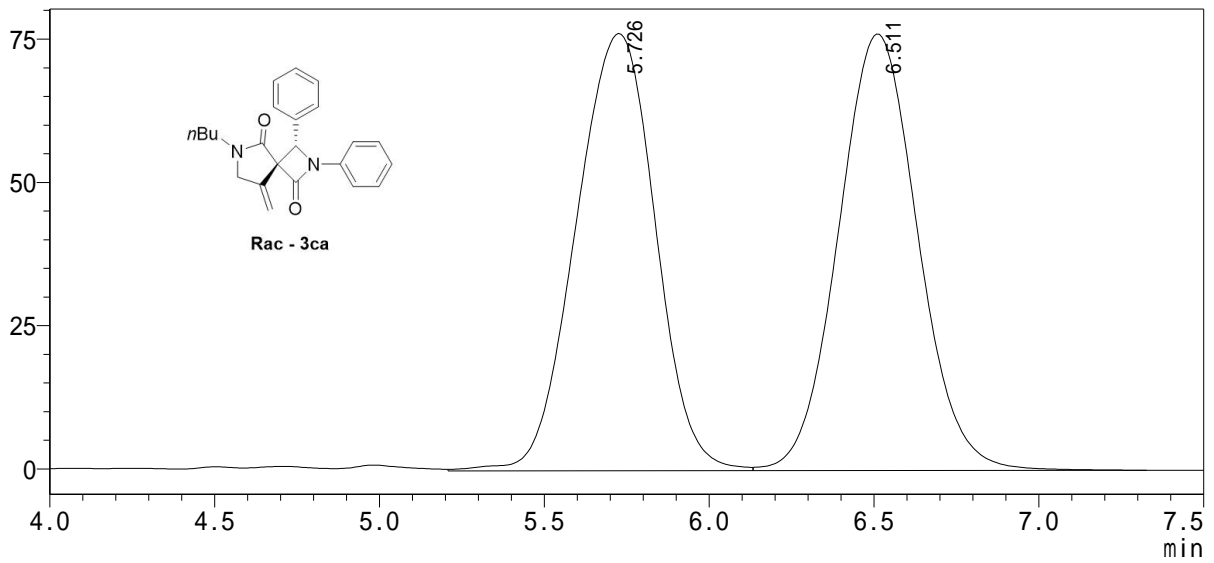

SPD-20A

| Entry | RT[min] | Area    | Height | Area%  |  |   |  |
|-------|---------|---------|--------|--------|--|---|--|
| 1     | 5.726   | 1275072 | 76291  | 50.072 |  |   |  |
| 2     | 6.511   | 1271409 | 76171  | 49.928 |  | V |  |
| Sum   |         | 2546481 | 152462 |        |  |   |  |



SHIMADZU

LabSolutions

## HPLC Replot

## &lt;Sample Information&gt;

Sample name : LSY-303-A1  
Data name : LSY-0727-299-s-AS20%.lcm  
Acq. name : AS-H-20%.lcm  
Location : 1-1  
Sample Type : unknown  
Ana. Date : 2023/7/27 15:58:20  
Pro. Date : 2023/7/27 16:15:47  
Analyst : System Administrator  
Processor : System Administrator

mV

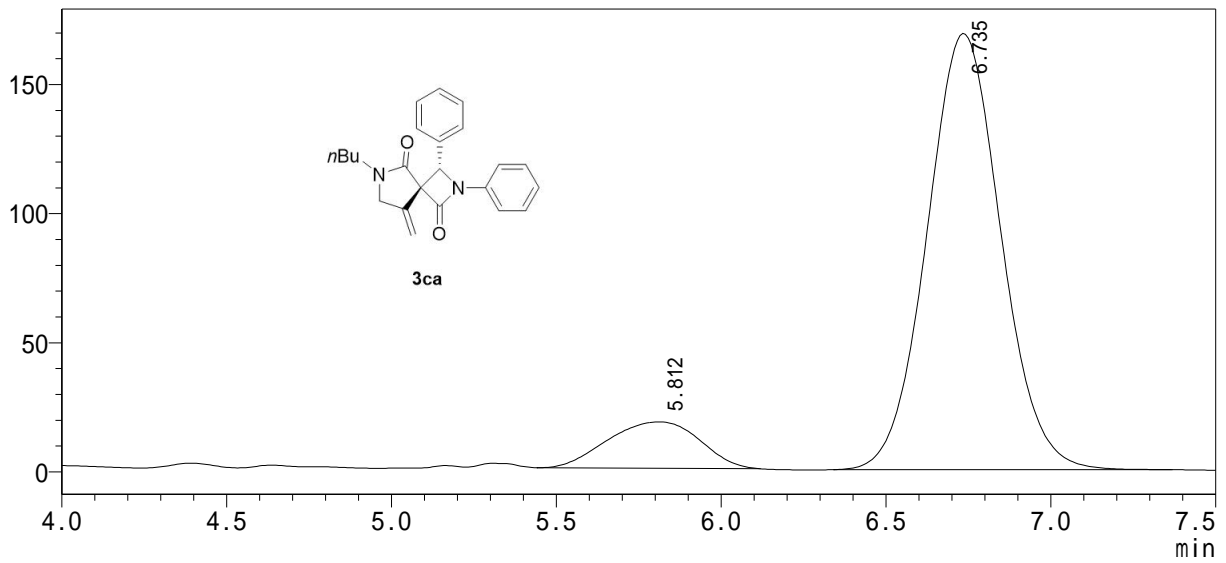

SPD-20A

| Entry | RT[min] | Area    | Height | Area%  |  |   |
|-------|---------|---------|--------|--------|--|---|
| 1     | 5.812   | 347867  | 17974  | 11.686 |  | M |
| 2     | 6.735   | 2628919 | 168940 | 88.314 |  | M |
| Sum   |         | 2976786 | 186914 |        |  |   |



SHIMADZU

LabSolutions

## HPLC Reprot

## &lt;Sample Information&gt;

Sample name : LSY-0819-310-b2-X-AS20%  
Data name : LSY-0819-310-b1-X-AS20%.lcd  
Acq. name : AS-H-20%.lcm  
Location : 1-1  
Sample Type : unknown  
Ana. Date : 2023/8/19 15:29:17  
Pro. Date : 2023/8/19 15:57:56  
Analyst : System Administrator  
Processor : System Administrator

mV

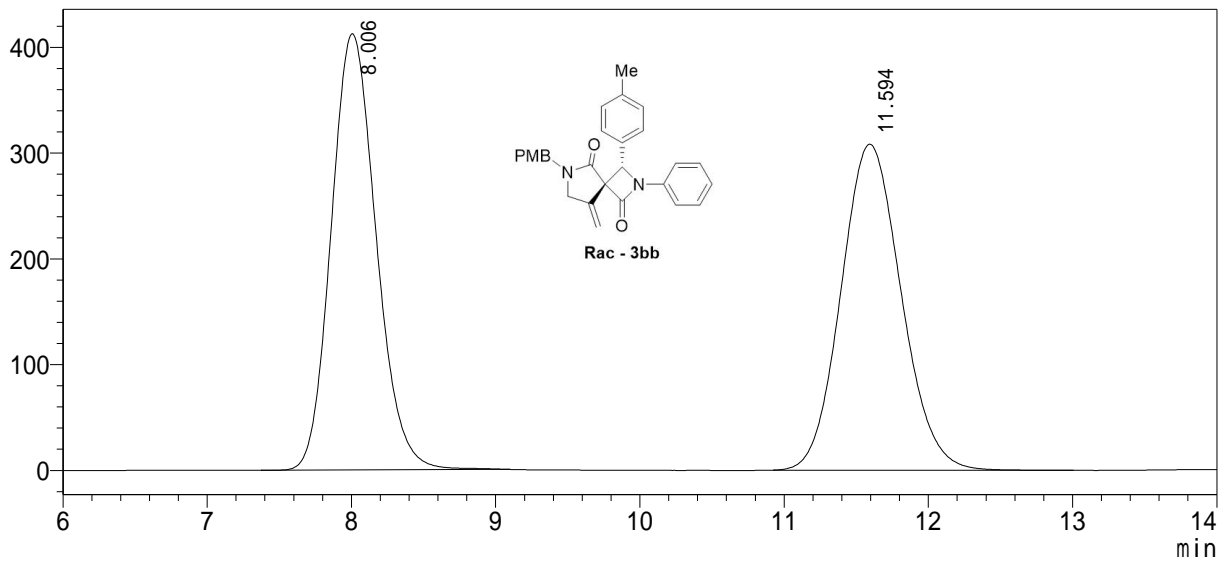

SPD-20A

| Entry | RT[min] | Area     | Height | Area%  |  |   |  |
|-------|---------|----------|--------|--------|--|---|--|
| 1     | 8.006   | 8927607  | 412434 | 50.007 |  | M |  |
| 2     | 11.594  | 8925212  | 308237 | 49.993 |  | M |  |
| Sum   |         | 17852819 | 720671 |        |  |   |  |





SHIMADZU

LabSolutions

# HPLC Replot

## <Sample Information>

Sample name : LSY-0818-314-b2-s-AS20%  
Data name : LSY-0818-314-b2-s-AS20%.lcd  
Acq. name : AS-H-20%.lcm  
Location : 1-1  
Sample Type : unknown  
Ana. Date : 2023/8/18 18:31:03  
Pro. Date : 2023/11/1 17:14:20  
Analyst : System Administrator  
Processor : System Administrator

mV

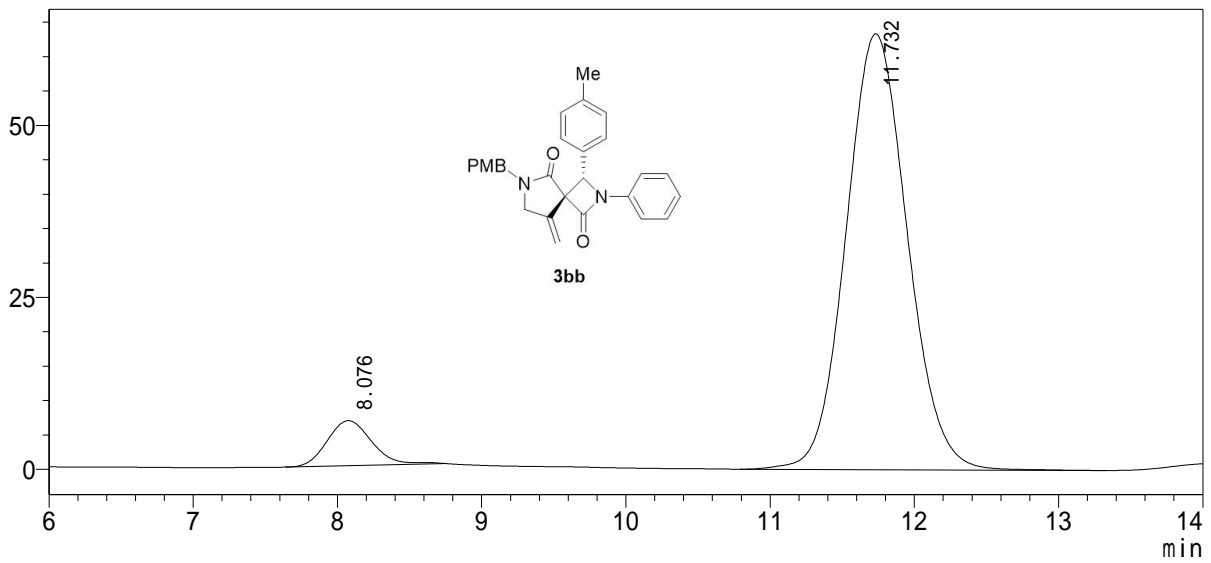

SPD-20A

| Entry | RT[min] | Area    | Height | Area%  |  |   |
|-------|---------|---------|--------|--------|--|---|
| 1     | 8.076   | 140103  | 6537   | 6.974  |  | M |
| 2     | 11.732  | 1868754 | 63346  | 93.026 |  |   |
| Sum   |         | 2008857 | 69883  |        |  |   |



SHIMADZU

LabSolutions

## HPLC Replot

## &lt;Sample Information&gt;

Sample name : ISY-1031-419-ipr-AS20 %  
Data name : ISY-1031-419-ipr-AS20 %.lcd  
Acq. name : AS-H-20%.lcm  
Location : 1-1  
Sample Type : unknown  
Ana. Date : 2023/10/31 15:50:29  
Pro. Date : 2023/11/1 16:06:24  
Analyst : System Administrator  
Processor : System Administrator

mV

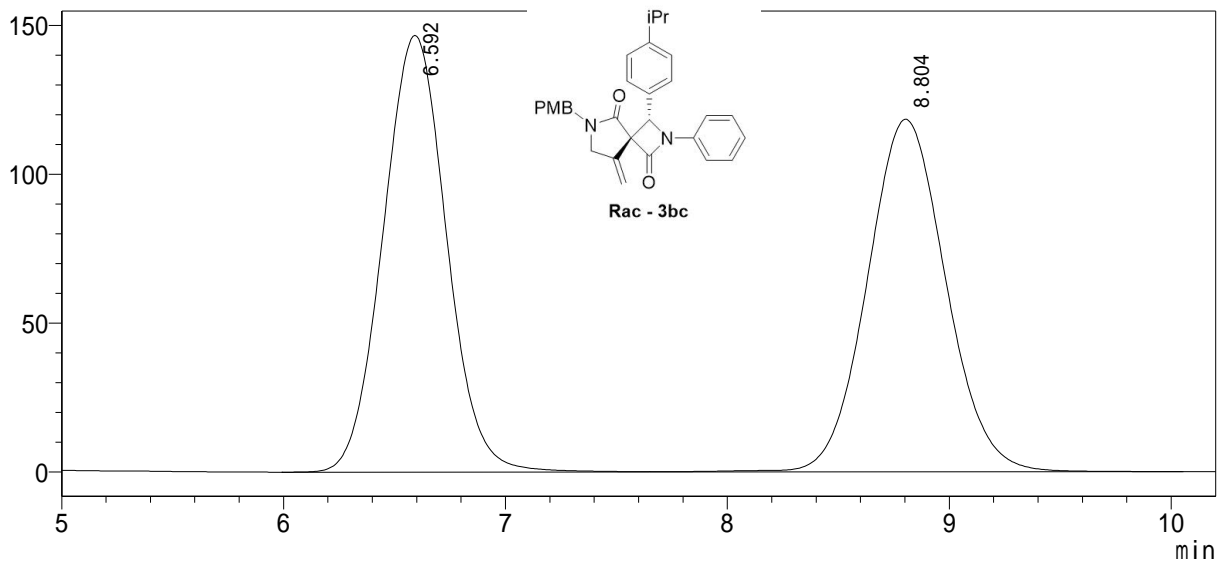

SPD-20A

| Entry | RT[min] | Area    | Height | Area%  |  |   |  |
|-------|---------|---------|--------|--------|--|---|--|
| 1     | 6.592   | 2917819 | 146700 | 50.023 |  |   |  |
| 2     | 8.804   | 2915078 | 118452 | 49.977 |  | V |  |
| Sum   |         | 5832897 | 265152 |        |  |   |  |

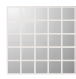

SHIMADZU

LabSolutions

## HPLC Replot

## &lt;Sample Information&gt;

Sample name : LSY-0914-S-354-B2-AS20%

Data name : LSY-0914-S-354-B2-AS20%.lcd

Acq. name : AS-H-20%.lcm

Location : 1-1  
: 1 uL

Sample Type : unknown

Ana. Date : 2023/9/14 16:59:16

Analyst : System Administrator

Pro. Date : 2023/9/14 17:10:10

Processor : System Administrator

mV

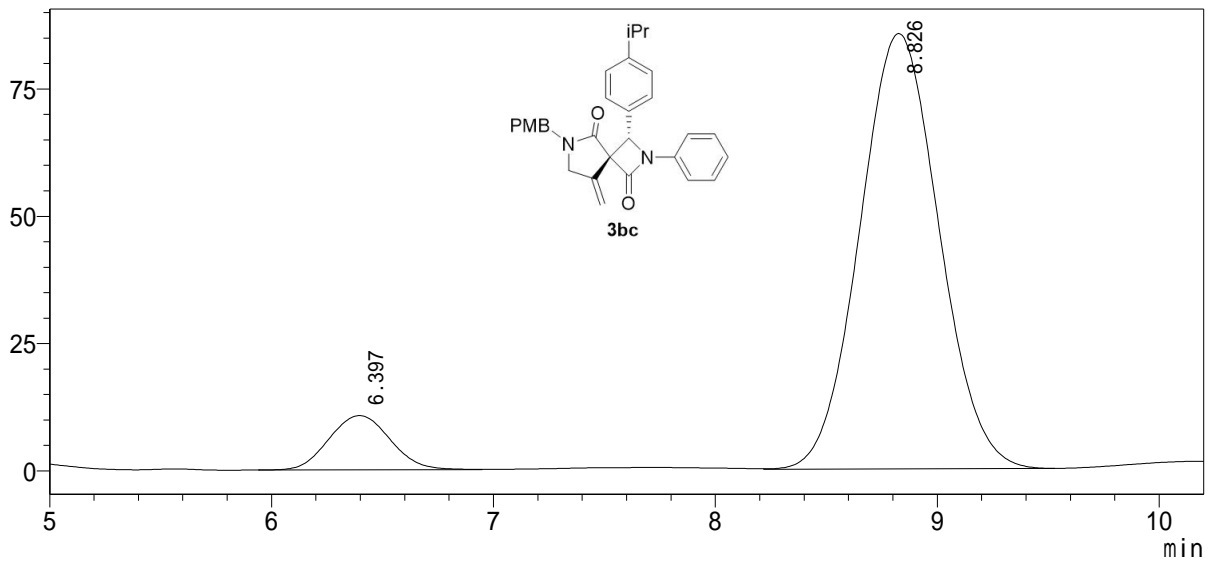

SPD-20A

| Entry | RT[min] | Area    | Height | Area%  |   |  |
|-------|---------|---------|--------|--------|---|--|
| 1     | 6.397   | 204444  | 10662  | 8.791  | V |  |
| 2     | 8.826   | 2121062 | 85522  | 91.209 |   |  |
| Sum   |         | 2325506 | 96185  |        |   |  |



SHIMADZU

LabSolutions

# HPLC Replot

## <Sample Information>

Sample name : LSY-0921-361-B1-X-AS20%  
Data name : LSY-0921-361-B1-X-AS20%.lcd  
Acq. name : AS-H-20%.lcm  
Location : 1-1  
Sample Type : unknown  
Ana. Date : 2023/9/21 15:06:46  
Pro. Date : 2024/5/29 15:14:52  
Analyst : System Administrator  
Processor : System Administrator

mV

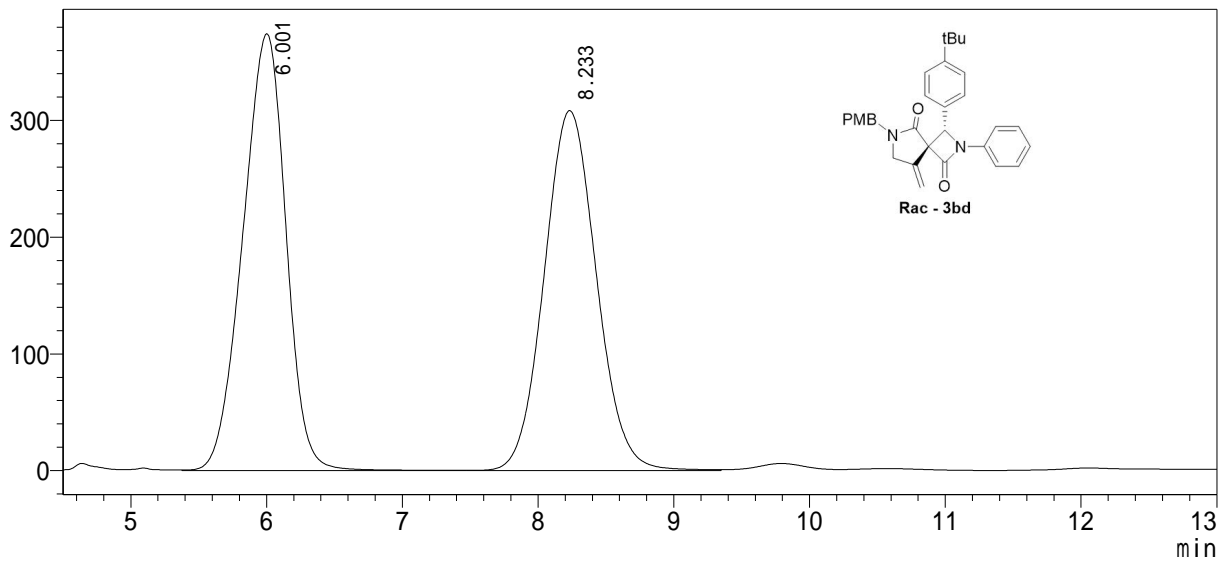

SPD-20A

| Entry | RT[min] | Area     | Height | Area%  |   |  |  |
|-------|---------|----------|--------|--------|---|--|--|
| 1     | 6.001   | 8246536  | 374286 | 50.046 |   |  |  |
| 2     | 8.233   | 8231454  | 308448 | 49.954 | V |  |  |
| Sum   |         | 16477990 | 682734 |        |   |  |  |



SHIMADZU

LabSolutions

# HPLC Reprot

## <Sample Information>

Sample name : LSY-0921-362-B1-1-AS20%  
Data name : LSY-0921-362-B1-1-AS20%.lcd  
Acq. name : AS-H-20%.lcm  
Location : 1-1  
Sample Type : unknown  
Ana. Date : 2023/9/21 16:52:50  
Analyst : System Administrator  
Pro. Date : 2024/5/29 15:14:25  
Processor : System Administrator

mV

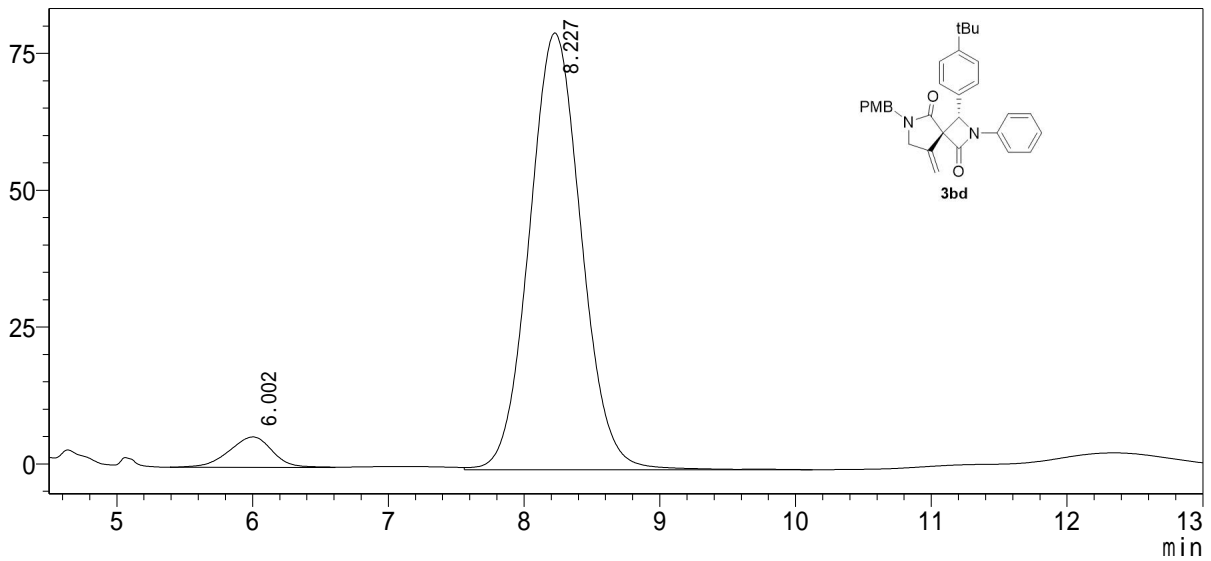

SPD-20A

| Entry | RT[min] | Area    | Height | Area%  |   |  |
|-------|---------|---------|--------|--------|---|--|
| 1     | 6.002   | 123807  | 5564   | 5.517  |   |  |
| 2     | 8.227   | 2120319 | 79787  | 94.483 | S |  |
| Sum   |         | 2244126 | 85352  |        |   |  |



SHIMADZU

LabSolutions

## HPLC Reprot

## &lt;Sample Information&gt;

Sample name : LSY-0927-367-B1-X-AS20%

Data name : LSY-0927-367-B1-X-AS20%001.lcd

Acq. name : AS-H-20%.lcm

Location : 1-1  
: 1 uL

Sample Type : unknown

Ana. Date : 2023/9/27 16:11:38

Analyst : System Administrator

Pro. Date : 2023/9/27 17:21:50

Processor : System Administrator

mV

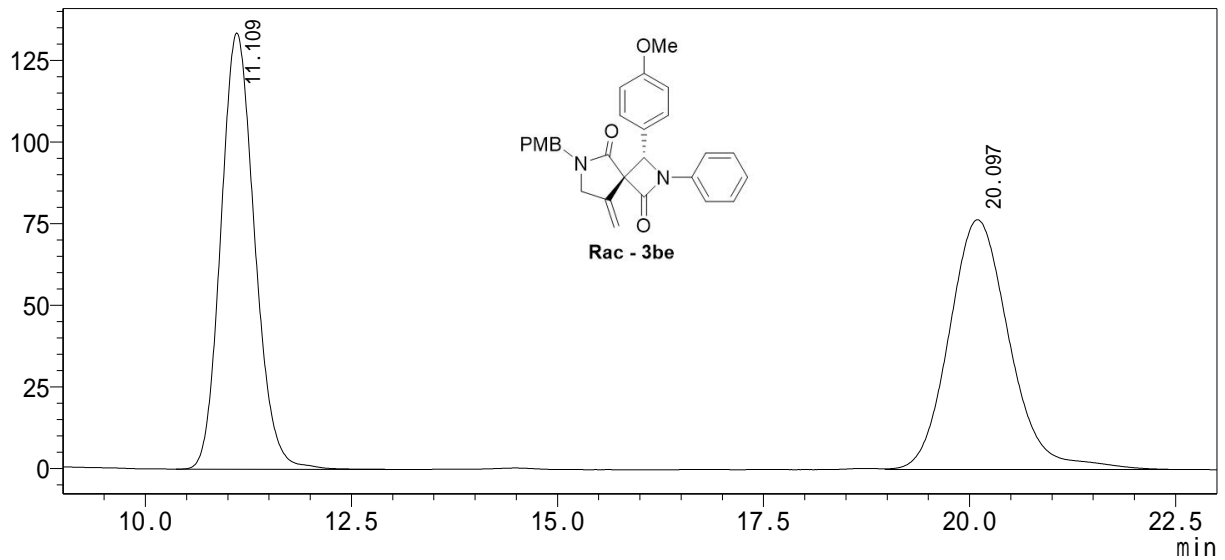

SPD-20A

| Entry | RT[min] | Area    | Height | Area%  |  |  |  |
|-------|---------|---------|--------|--------|--|--|--|
| 1     | 11.109  | 3805717 | 133589 | 49.416 |  |  |  |
| 2     | 20.097  | 3895707 | 76526  | 50.584 |  |  |  |
| Sum   |         | 7701424 | 210115 |        |  |  |  |



SHIMADZU

LabSolutions

# HPLC Reprot

## <Sample Information>

Sample name : ISY-0928-370-B1-AS20%  
Data name : ISY-0928-370-B1-AS20%.lcd  
Acq. name : AS-H-20%.lcm  
Location : 1-1  
Sample Type : unknown  
Ana. Date : 2023/9/28 14:30:29  
Analyst : System Administrator  
Pro. Date : 2023/9/28 15:09:09  
Processor : System Administrator

mV

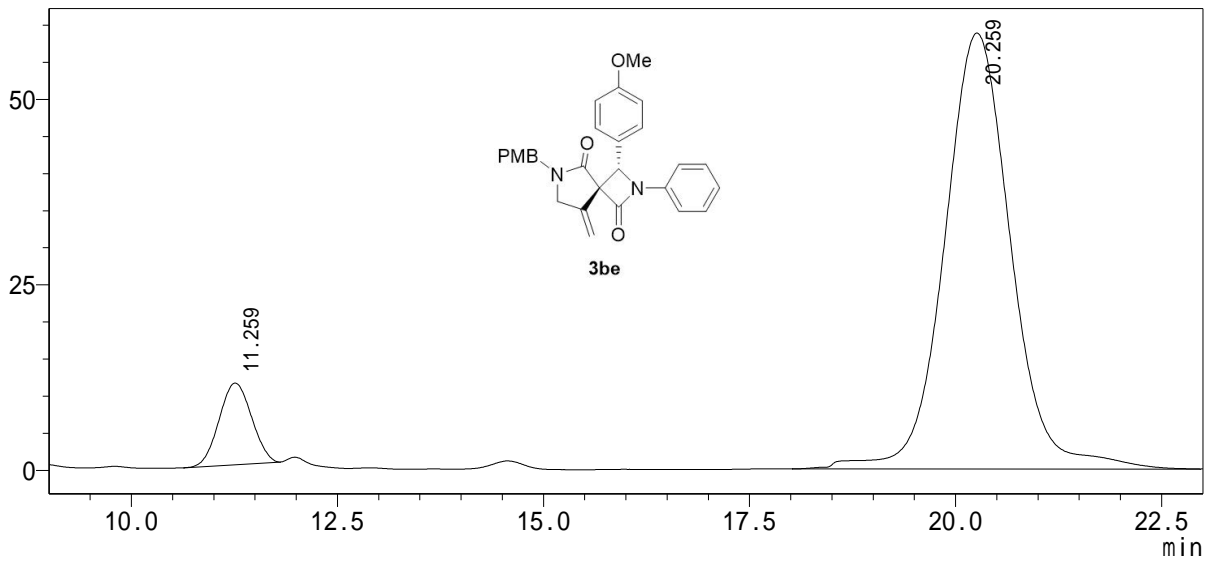

SPD-20A

| Entry | RT[min] | Area    | Height | Area%  |  |   |
|-------|---------|---------|--------|--------|--|---|
| 1     | 11.259  | 301942  | 11010  | 8.386  |  | M |
| 2     | 20.259  | 3298402 | 58784  | 91.614 |  |   |
| Sum   |         | 3600343 | 69794  |        |  |   |



SHIMADZU

LabSolutions

## HPLC Reprot

## &lt;Sample Information&gt;

Sample name : LSY-0921-361-B2-X-AS20%

Data name : LSY-0921-361-B2-X-AS20%.lcd

Acq. name : AS-H-20%.lcm

Location : 1-1  
: 1 uL

Sample Type : unknown

Ana. Date : 2023/9/21 15:34:42

Analyst : System Administrator

Pro. Date : 2023/9/21 21:59:33

Processor : System Administrator

mV

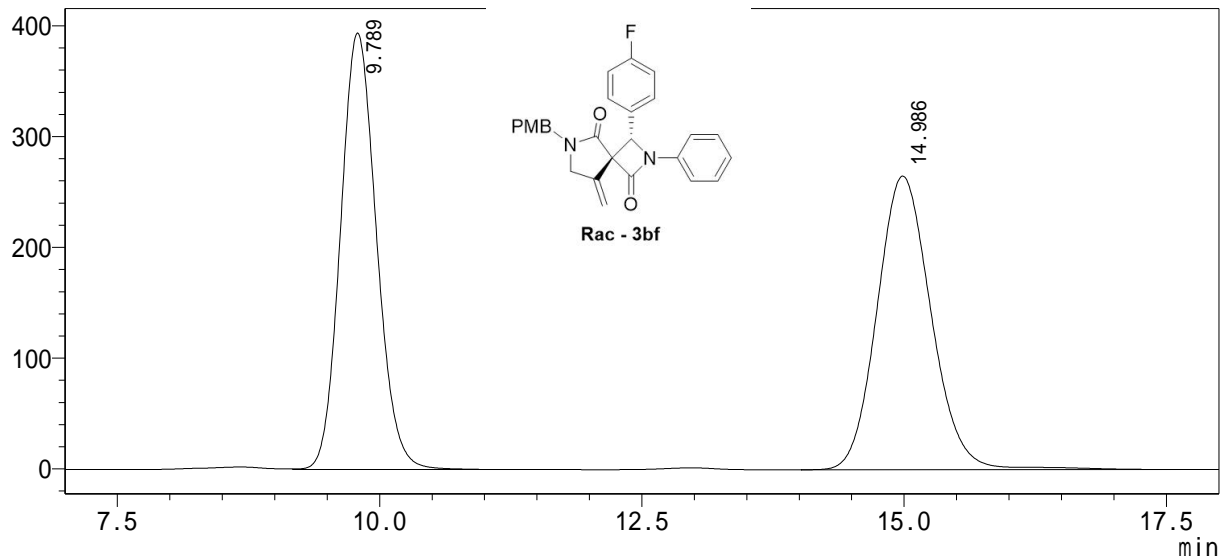

SPD-20A

| Entry | RT[min] | Area     | Height | Area%  |  |  |  |
|-------|---------|----------|--------|--------|--|--|--|
| 1     | 9.789   | 9395084  | 394122 | 49.739 |  |  |  |
| 2     | 14.986  | 9493682  | 265028 | 50.261 |  |  |  |
| Sum   |         | 18888766 | 659150 |        |  |  |  |





SHIMADZU

LabSolutions

# HPLC Replot

## <Sample Information>

Sample name : LSY-0921-362-B2-S-AS20%  
Data name : LSY-0921-362-B2-S-AS20%.lcd  
Acq. name : AS-H-20%.lcm  
Location : 1-1  
Sample Type : unknown  
Ana. Date : 2023/9/21 16:21:23  
Pro. Date : 2023/9/21 16:48:57  
Analyst : System Administrator  
Processor : System Administrator

mV

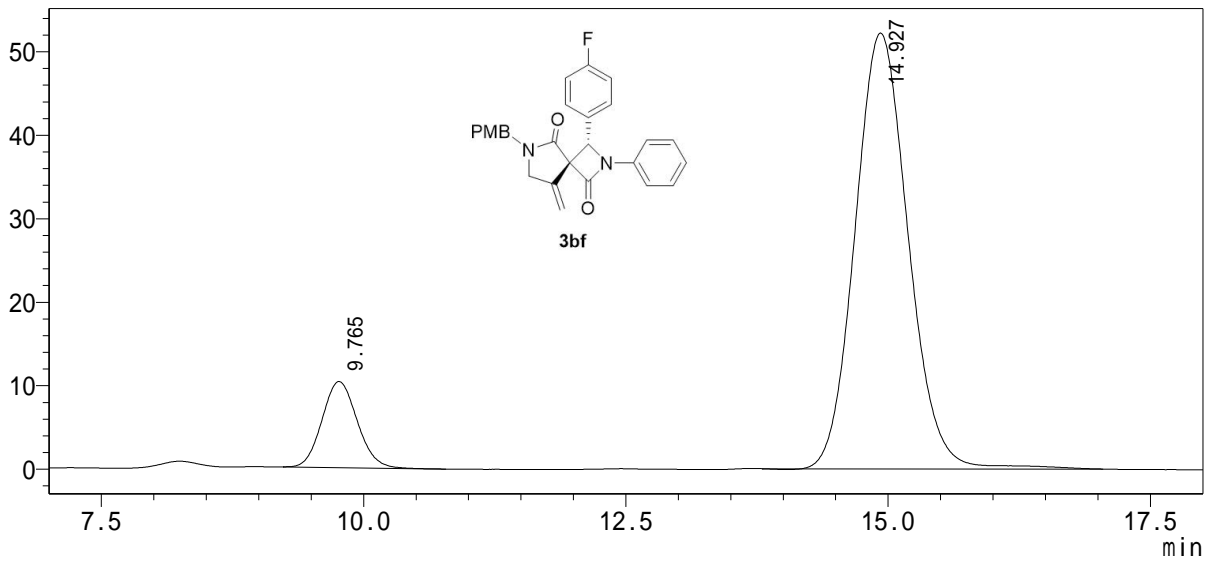

SPD-20A

| Entry | RT[min] | Area    | Height | Area%  |  |   |  |
|-------|---------|---------|--------|--------|--|---|--|
| 1     | 9.765   | 240746  | 10311  | 11.588 |  |   |  |
| 2     | 14.927  | 1836717 | 52208  | 88.412 |  | M |  |
| Sum   |         | 2077463 | 62519  |        |  |   |  |



SHIMADZU

LabSolutions

# HPLC Reprot

## <Sample Information>

Sample name : LSY-0921-363-B3-X-AS20%  
Data name : LSY-0921-363-B3-X-AS20%.lcd  
Acq. name : AS-H-20%.lcm  
Location : 1-1  
Sample Type : unknown  
Ana. Date : 2023/9/21 17:13:10  
Pro. Date : 2023/9/22 15:53:18  
Analyst : System Administrator  
Processor : System Administrator

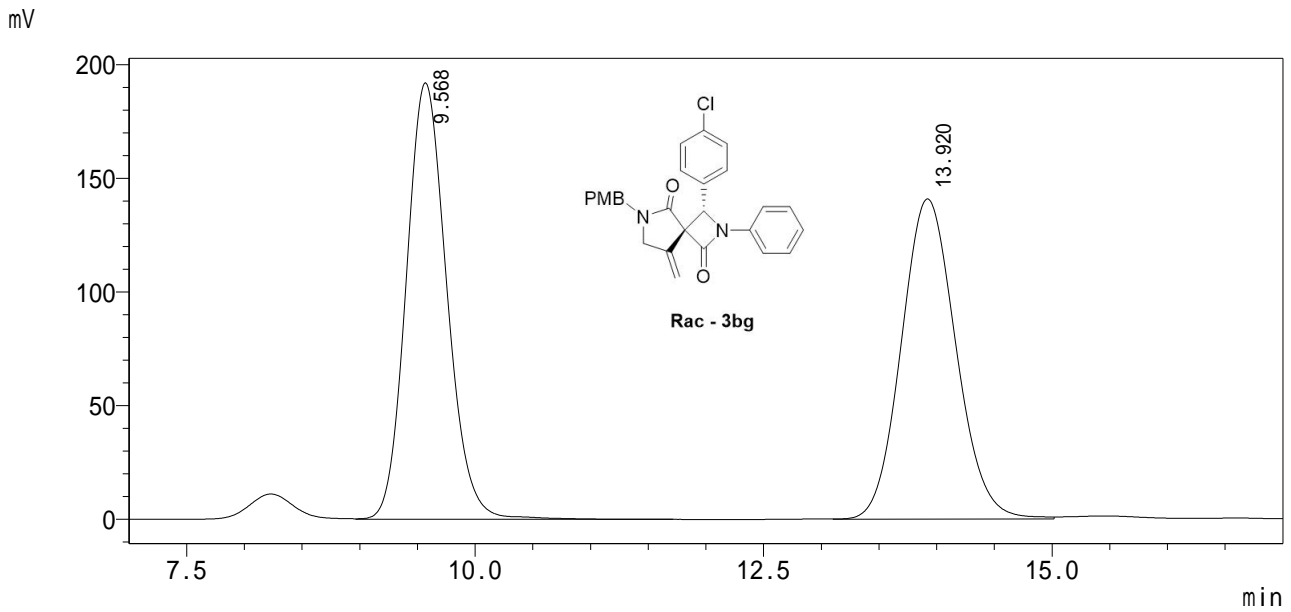

SPD-20A

| Entry | RT[min] | Area    | Height | Area%  |  |  |  |
|-------|---------|---------|--------|--------|--|--|--|
| 1     | 9.568   | 4694542 | 192076 | 50.286 |  |  |  |
| 2     | 13.920  | 4641093 | 140948 | 49.714 |  |  |  |
| Sum   |         | 9335635 | 333025 |        |  |  |  |



SHIMADZU

LabSolutions

# HPLC Reprot

## <Sample Information>

Sample name : ISY-1102-425-B1-AS20 %  
Data name : ISY-1102-425-B1-AS20 %.lcd  
Acq. name : AS-H-20%.lcm  
Location : 1-1  
Sample Type : unknown  
Ana. Date : 2023/11/2 15:53:54  
Pro. Date : 2024/5/6 15:31:33  
Analyst : System Administrator  
Processor : System Administrator

mV

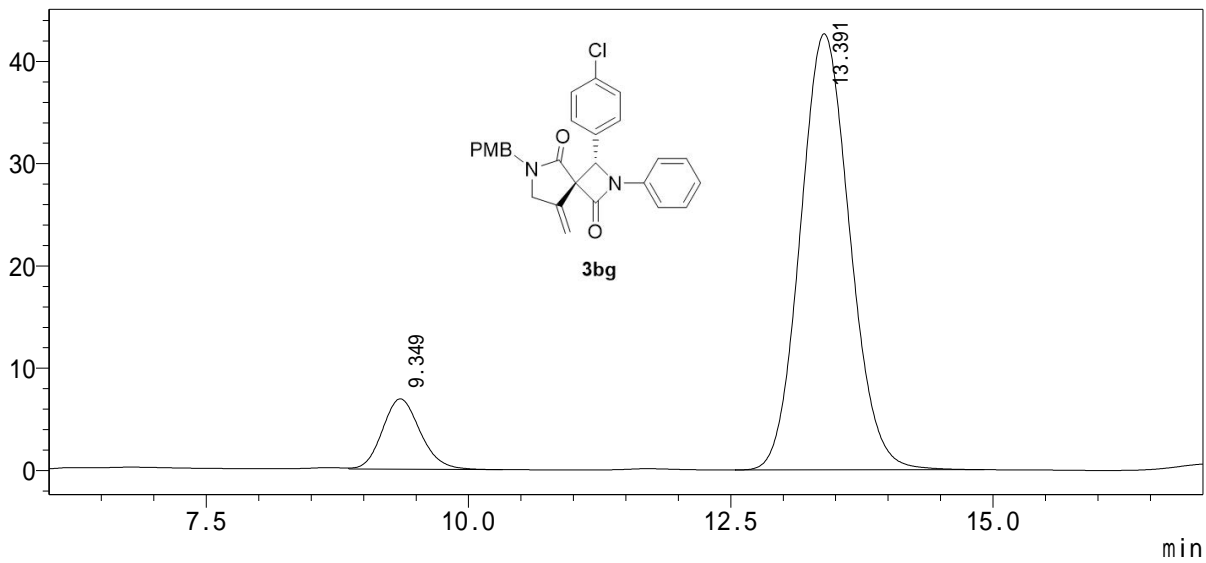

SPD-20A

| Entry | RT[min] | Area    | Height | Area%  |  |  |  |
|-------|---------|---------|--------|--------|--|--|--|
| 1     | 9.349   | 173200  | 6871   | 11.013 |  |  |  |
| 2     | 13.391  | 1399543 | 42650  | 88.987 |  |  |  |
| Sum   |         | 1572743 | 49521  |        |  |  |  |



SHIMADZU

LabSolutions

## HPLC Reprot

## &lt;Sample Information&gt;

Sample name : LSY-0907-334-B1-X-AS20%

Data name : LSY-0907-334-B1-X-AS20%.lcd

Acq. name : AS-H-20%.lcm

Location : 1-1  
: 1 uL

Sample Type : unknown

Ana. Date : 2023/9/7 15:49:12

Analyst : System Administrator

Pro. Date : 2023/11/1 16:31:42

Processor : System Administrator

mV

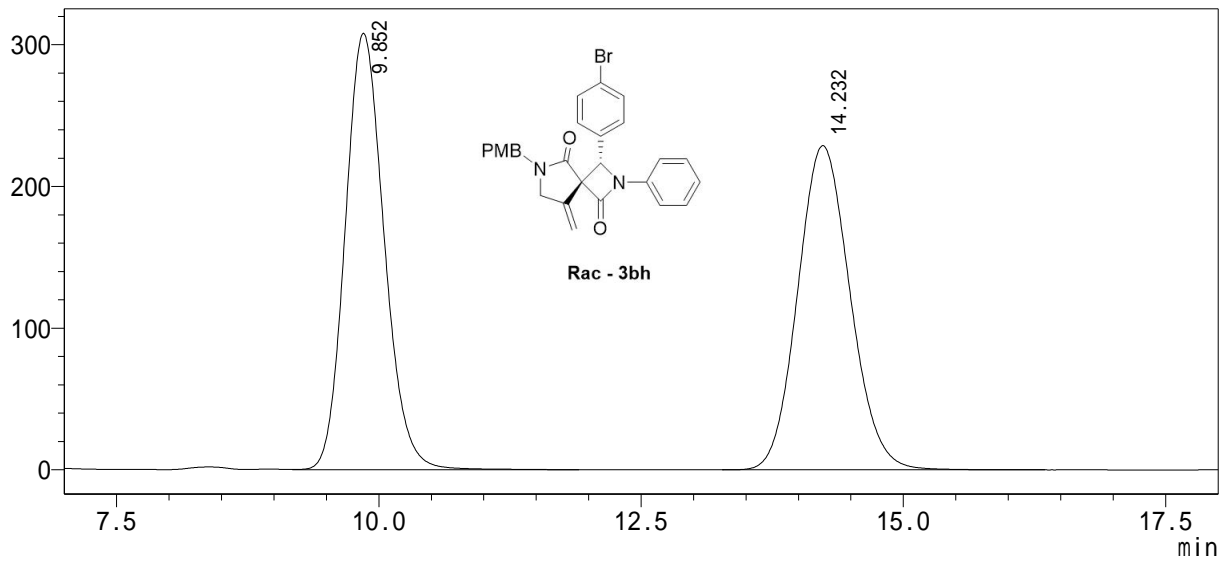

SPD-20A

| Entry | RT[min] | Area     | Height | Area%  |  |  |  |
|-------|---------|----------|--------|--------|--|--|--|
| 1     | 9.852   | 7968900  | 308126 | 50.057 |  |  |  |
| 2     | 14.232  | 7950609  | 228865 | 49.943 |  |  |  |
| Sum   |         | 15919509 | 536991 |        |  |  |  |



SHIMADZU

LabSolutions

# HPLC Reprot

## <Sample Information>

Sample name : LSY-0907-348-B1-S-AS20%  
Data name : LSY-0907-348-B1-S-AS20%.lcd  
Acq. name : AS-H-20%.lcm  
Location : 1-1  
Sample Type : unknown  
Ana. Date : 2023/9/7 16:11:01  
Analyst : System Administrator  
Pro. Date : 2023/9/7 16:32:31  
Processor : System Administrator

mV

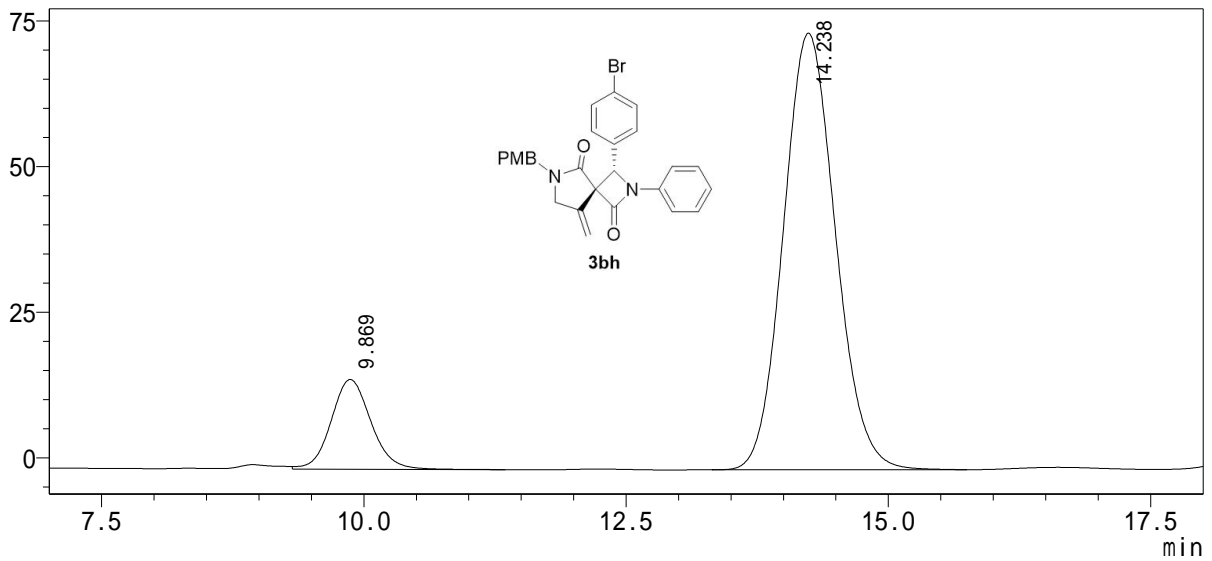

SPD-20A

| Entry | RT[min] | Area    | Height | Area%  |  |  |  |
|-------|---------|---------|--------|--------|--|--|--|
| 1     | 9.869   | 407679  | 15418  | 13.599 |  |  |  |
| 2     | 14.238  | 2590203 | 74968  | 86.401 |  |  |  |
| Sum   |         | 2997882 | 90386  |        |  |  |  |



SHIMADZU

LabSolutions

## HPLC Replot

## &lt;Sample Information&gt;

Sample name : LSY-0824-320-B1-AS20%

Data name : LSY-0824-320-B1-AS20%.lcd

Acq. name : AS-H-20%.lcm

Location : 1-1  
: 1 uL

Sample Type : unknown

Ana. Date : 2023/8/24 15:46:54

Analyst : System Administrator

Pro. Date : 2023/8/24 16:19:02

Processor : System Administrator

mV

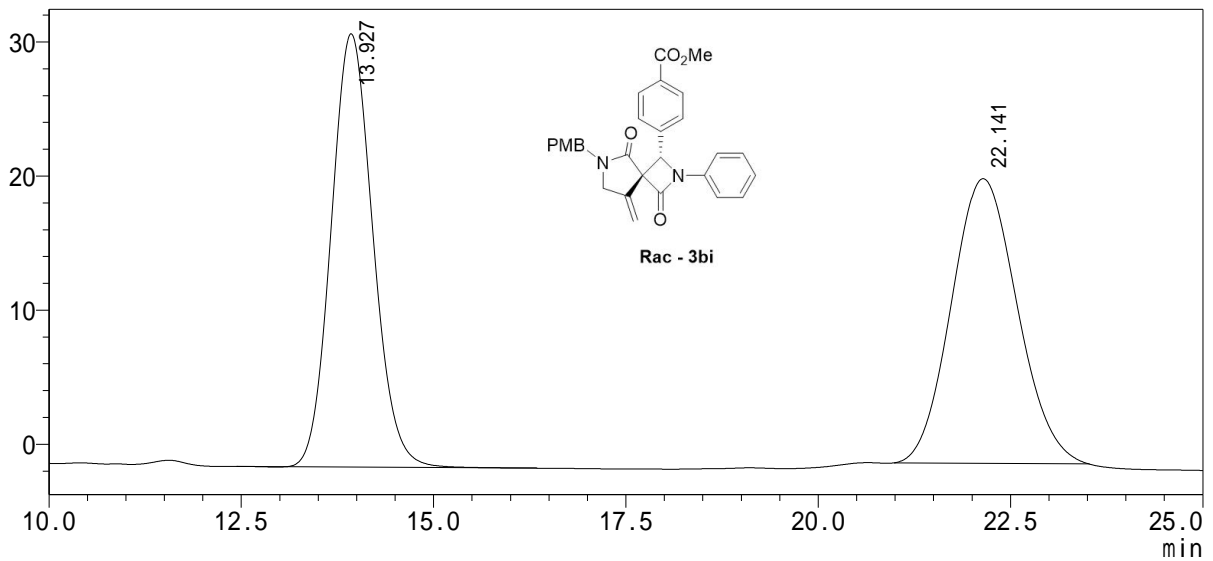

SPD-20A

| Entry | RT[min] | Area    | Height | Area%  |  |   |  |
|-------|---------|---------|--------|--------|--|---|--|
| 1     | 13.927  | 1220408 | 32316  | 49.211 |  | M |  |
| 2     | 22.141  | 1259532 | 21231  | 50.789 |  | M |  |
| Sum   |         | 2479940 | 53547  |        |  |   |  |



SHIMADZU

LabSolutions

## HPLC Replot

## &lt;Sample Information&gt;

Sample name : LSY-0829-S-330-b1-AS20%

Data name : LSY-0829-S-330-b1-AS20%.lcd

Acq. name : AS-H-20%.lcm

Location : 1-1  
: 1 uL

Sample Type : unknown

Ana. Date : 2023/8/29 16:33:48

Analyst : System Administrator

Pro. Date : 2023/11/1 16:34:59

Processor : System Administrator

mV

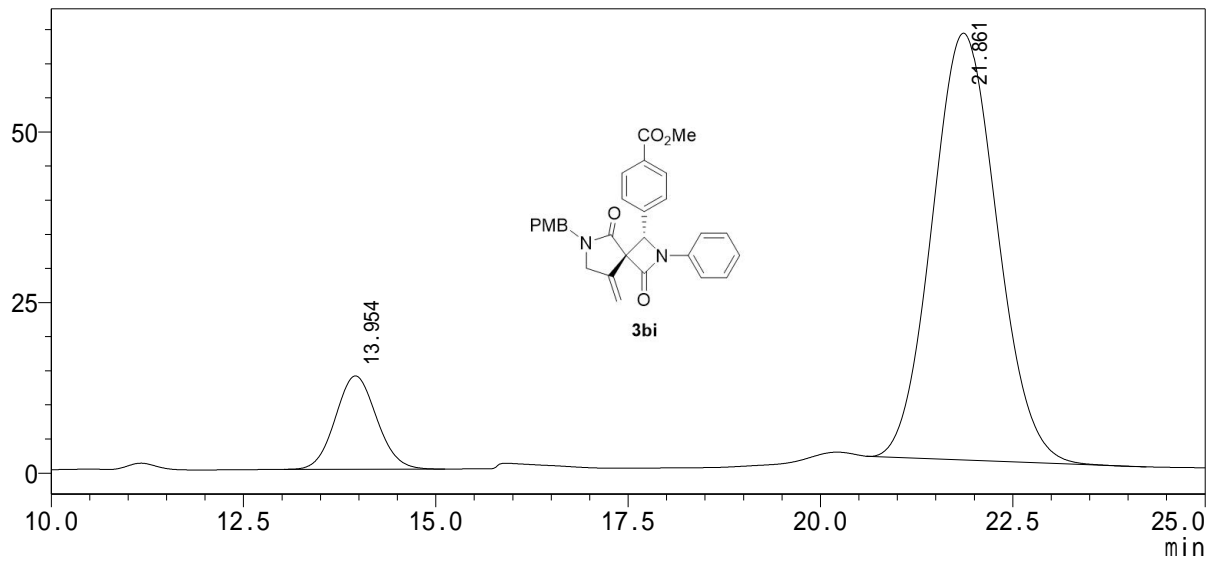

SPD-20A

| Entry | RT[min] | Area    | Height | Area%  |  |   |  |
|-------|---------|---------|--------|--------|--|---|--|
| 1     | 13.954  | 511532  | 13669  | 12.240 |  |   |  |
| 2     | 21.861  | 3667612 | 62537  | 87.760 |  | M |  |
| Sum   |         | 4179144 | 76206  |        |  |   |  |



SHIMADZU

LabSolutions

# HPLC Reprot

## <Sample Information>

Sample name : LSY-0906-343-B2-AS20%

Data name : LSY-0906-343-B2-AS20%.lcd

Acq. name : AS-H-20%.lcm

Location : 1-1  
: 1 uL

Sample Type : unknown

Ana. Date : 2023/9/6 16:18:58

Analyst : System Administrator

Pro. Date : 2024/5/29 14:25:25

Processor : System Administrator

mV

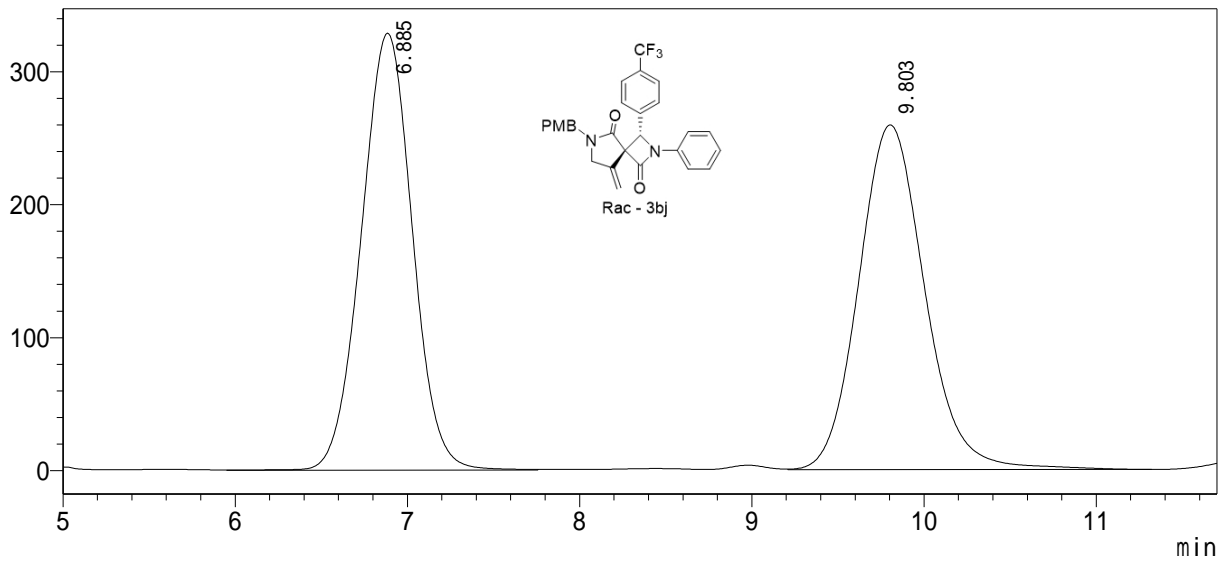

SPD-20A

| Entry | RT[min] | Area     | Height | Area%  |  |  |  |
|-------|---------|----------|--------|--------|--|--|--|
| 1     | 6.885   | 6774490  | 328850 | 49.458 |  |  |  |
| 2     | 9.803   | 6922952  | 259554 | 50.542 |  |  |  |
| Sum   |         | 13697442 | 588405 |        |  |  |  |





SHIMADZU

LabSolutions

# HPLC Replot

## <Sample Information>

Sample name : LSY-0915-S-357-B1-AS20%  
Data name : LSY-0915-S-357-B1-AS20%.lcd  
Acq. name : AS-H-20%.lcm  
Location : 1-1  
Sample Type : unknown  
Ana. Date : 2023/9/16 15:50:36  
Pro. Date : 2024/5/29 11:31:06  
Analyst : System Administrator  
Processor : System Administrator

mV

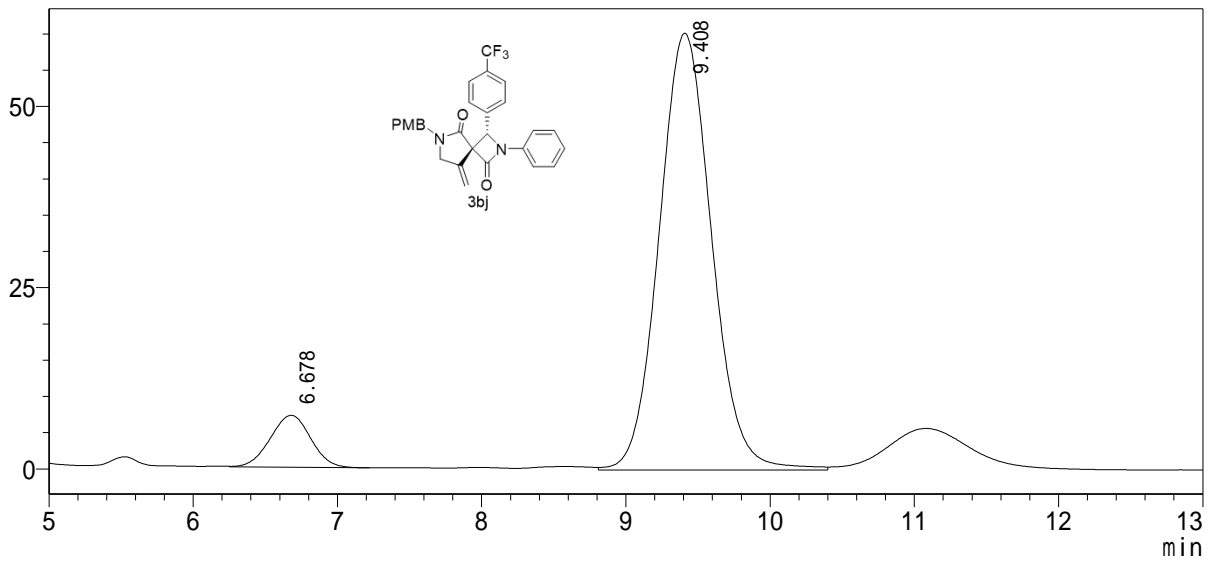

SPD-20A

| Entry | RT[min] | Area    | Height | Area%  |   |  |
|-------|---------|---------|--------|--------|---|--|
| 1     | 6.678   | 140081  | 7171   | 8.432  | V |  |
| 2     | 9.408   | 1521151 | 60232  | 91.568 |   |  |
| Sum   |         | 1661232 | 67403  |        |   |  |



SHIMADZU

LabSolutions

# HPLC Reprot

## <Sample Information>

Sample name : LSY-0726-301-A-AS20%  
Data name : LSY-0726-301-A-AS20%.lcd  
Acq. name : AS-H-20%.lcm  
Location : 1-1  
Sample Type : unknown  
Ana. Date : 2023/7/26 19:55:37  
Pro. Date : 2023/7/26 20:52:38  
Analyst : System Administrator  
Processor : System Administrator

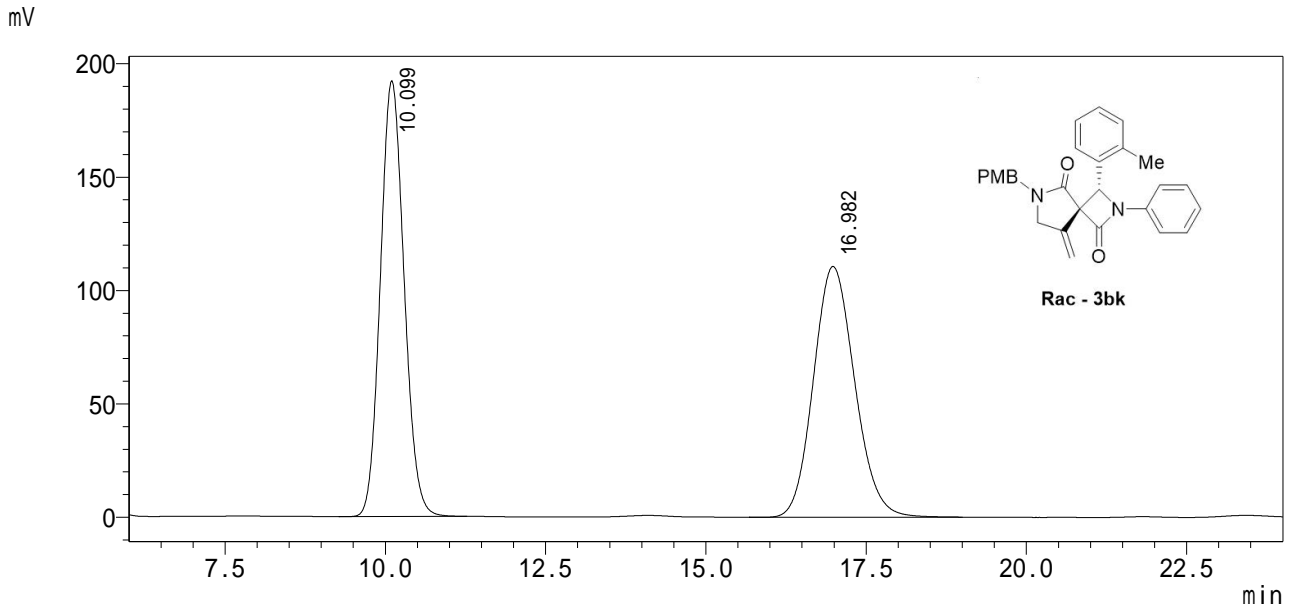

SPD-20A

| Entry | RT[min] | Area    | Height | Area%  |   |  |
|-------|---------|---------|--------|--------|---|--|
| 1     | 10.099  | 4953103 | 192207 | 50.023 |   |  |
| 2     | 16.982  | 4948507 | 110621 | 49.977 | M |  |
| Sum   |         | 9901610 | 302828 |        |   |  |



SHIMADZU

LabSolutions

# HPLC Replot

## <Sample Information>

Sample name : LSY-0726-301-B-AS20%  
Data name : LSY-0726-301-B-AS20%.lcd  
Acq. name : AS-H-20%.lcm  
Location : 1-1  
Sample Type : unknown  
Ana. Date : 2023/7/26 20:24:01  
Pro. Date : 2024/5/9 14:34:02  
Analyst : System Administrator  
Processor : System Administrator

mV

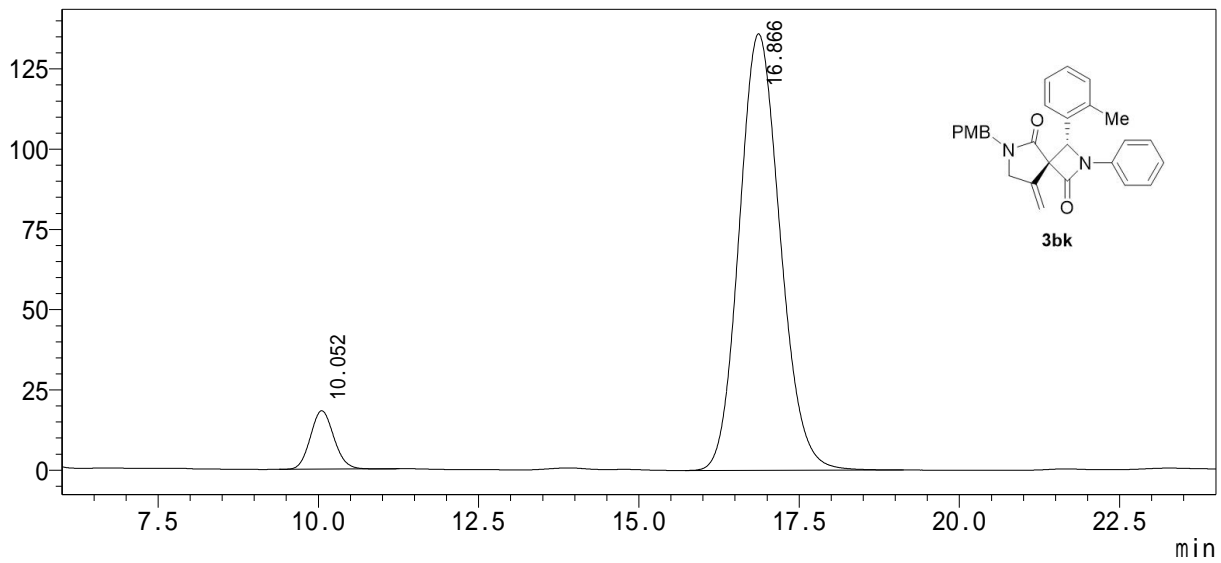

SPD-20A

| Entry | RT[min] | Area    | Height | Area%  |  |   |
|-------|---------|---------|--------|--------|--|---|
| 1     | 10.052  | 463505  | 18177  | 7.131  |  | M |
| 2     | 16.866  | 6036796 | 136014 | 92.869 |  |   |
| Sum   |         | 6500301 | 154191 |        |  |   |



SHIMADZU

LabSolutions

# HPLC Replot

## <Sample Information>

Sample name : LSY-0818-308-b1-AS20%  
Data name : LSY-0818-308-b1-X-AS20%.lcd  
Acq. name : AS-H-20%.lcm  
Location : 1-1  
Sample Type : unknown  
Ana. Date : 2023/8/18 16:31:07  
Pro. Date : 2023/8/18 17:14:58  
Analyst : System Administrator  
Processor : System Administrator

mV

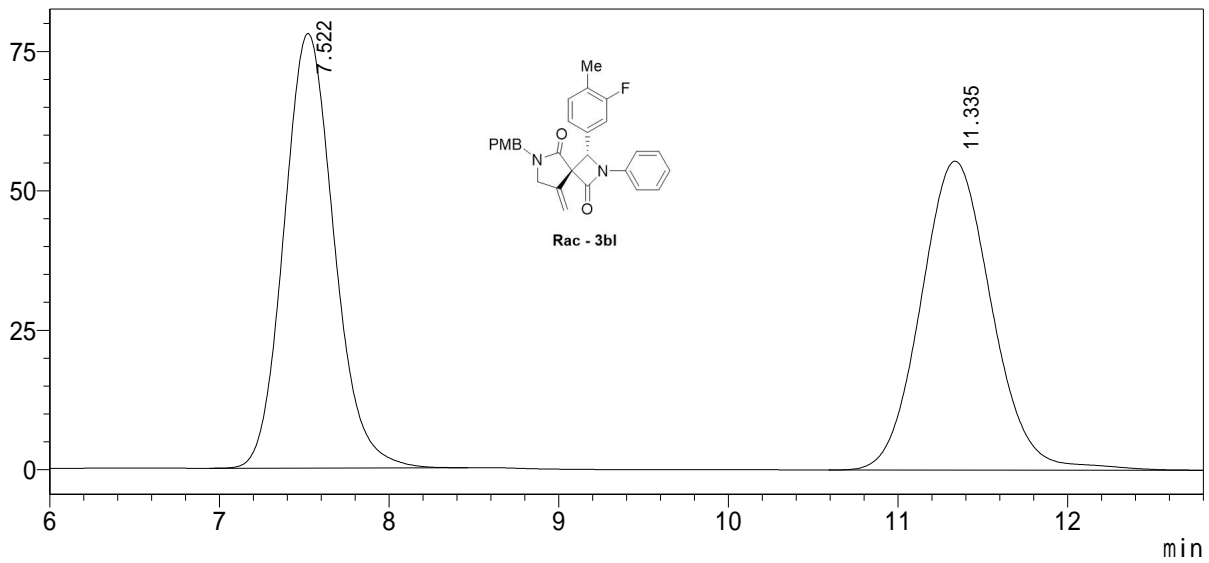

SPD-20A

| Entry | RT[min] | Area    | Height | Area%  |  |  |  |
|-------|---------|---------|--------|--------|--|--|--|
| 1     | 7.522   | 1598310 | 77925  | 49.957 |  |  |  |
| 2     | 11.335  | 1601061 | 55410  | 50.043 |  |  |  |
| Sum   |         | 3199371 | 133335 |        |  |  |  |



SHIMADZU

LabSolutions

## HPLC Reprot

## &lt;Sample Information&gt;

Sample name : LSY-0818-314-b1-AS20%

Data name : LSY-0818-314-b1-S-AS20%.lcd

Acq. name : AS-H-20%.lcm

Location : 1-1  
: 1 uL

Sample Type : unknown

Ana. Date : 2023/8/18 16:51:31

Analyst : System Administrator

Pro. Date : 2023/8/18 17:14:25

Processor : System Administrator

mV

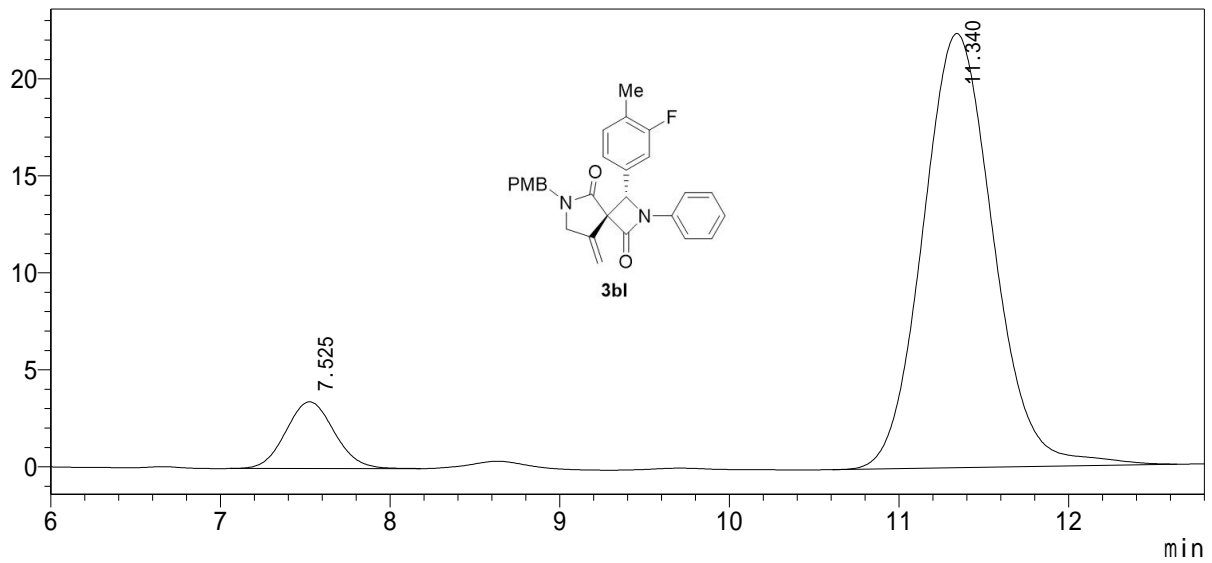

SPD-20A

| Entry | RT[min] | Area   | Height | Area%  |  |  |  |
|-------|---------|--------|--------|--------|--|--|--|
| 1     | 7.525   | 68392  | 3442   | 9.574  |  |  |  |
| 2     | 11.340  | 645952 | 22382  | 90.426 |  |  |  |
| Sum   |         | 714343 | 25824  |        |  |  |  |



SHIMADZU

LabSolutions

# HPLC Reprot

## <Sample Information>

Sample name : LSY-0927-367-B2-X-AS20%  
Data name : LSY-0927-367-B2-X-AS20%.lcd  
Acq. name : AS-H-20%.lcm  
Location : 1-1  
Sample Type : unknown  
Ana. Date : 2023/9/27 15:27:08  
Analyst : System Administrator  
Pro. Date : 2023/9/28 12:29:28  
Processor : System Administrator

mV

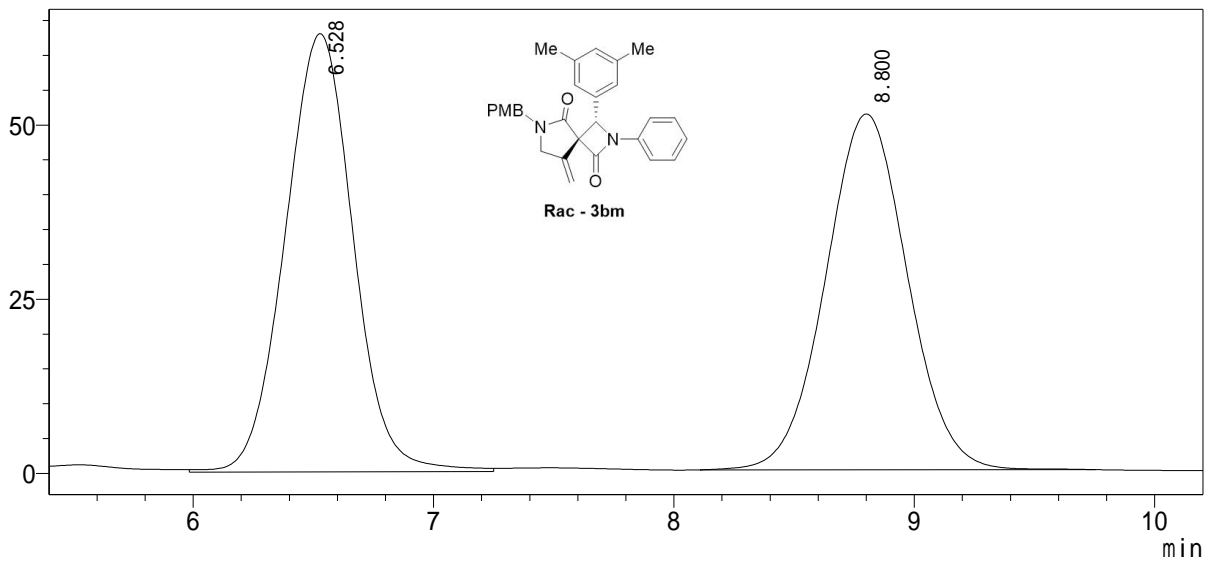

SPD-20A

| Entry | RT[min] | Area    | Height | Area%  |  |   |  |
|-------|---------|---------|--------|--------|--|---|--|
| 1     | 6.528   | 1235258 | 62887  | 50.567 |  |   |  |
| 2     | 8.800   | 1207560 | 51084  | 49.433 |  | M |  |
| Sum   |         | 2442818 | 113971 |        |  |   |  |



SHIMADZU

LabSolutions

## HPLC Replot

## &lt;Sample Information&gt;

Sample name : LSY-0927-369-B2-S-AS20%  
Data name : LSY-0927-369-B2-S-AS20%.lcd  
Acq. name : AS-H-20%.lcm  
Location : 1-1  
Sample Type : unknown  
Ana. Date : 2023/9/27 15:46:29  
Analyst : System Administrator  
Pro. Date : 2023/9/27 16:56:27  
Processor : System Administrator

mV

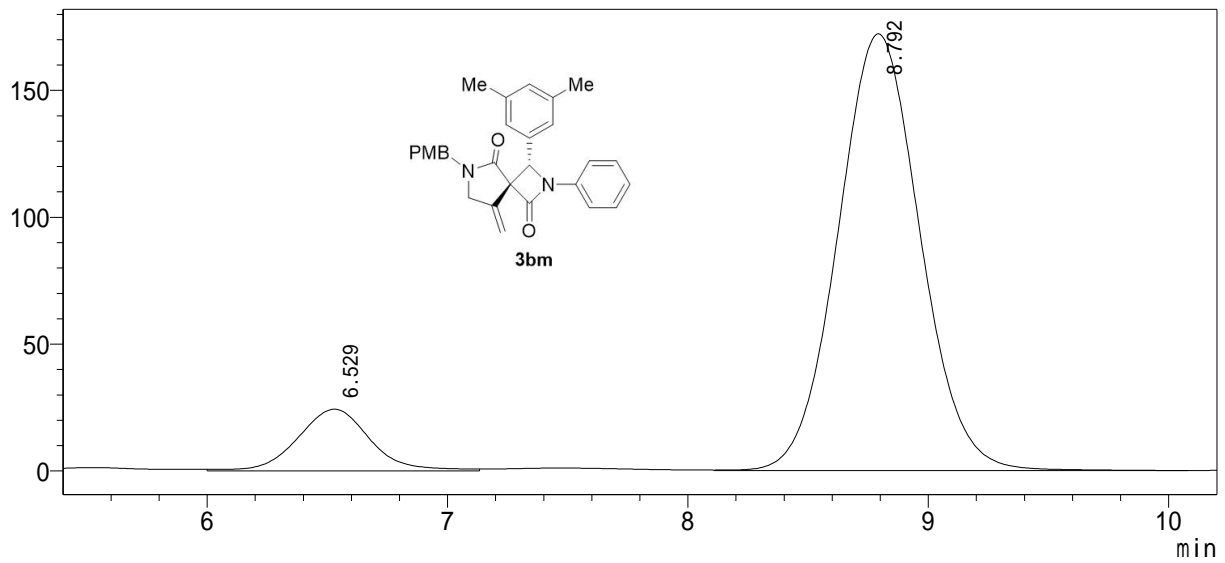

SPD-20A

| Entry | RT[min] | Area    | Height | Area%  |  |  |  |
|-------|---------|---------|--------|--------|--|--|--|
| 1     | 6.529   | 509435  | 24287  | 11.094 |  |  |  |
| 2     | 8.792   | 4082427 | 172176 | 88.906 |  |  |  |
| Sum   |         | 4591862 | 196463 |        |  |  |  |



SHIMADZU

LabSolutions

# HPLC Reprot

## <Sample Information>

Sample name : LSY-0818-310-b1-AS20%

Data name : LSY-0818-310-b2-AS20%.lcd

Acq. name : AS-H-20%.lcm

Location : 1-1  
: 1 uL

Sample Type : unknown

Ana. Date : 2023/8/18 17:17:12

Analyst : System Administrator

Pro. Date : 2024/5/6 16:33:39

Processor : System Administrator

mV

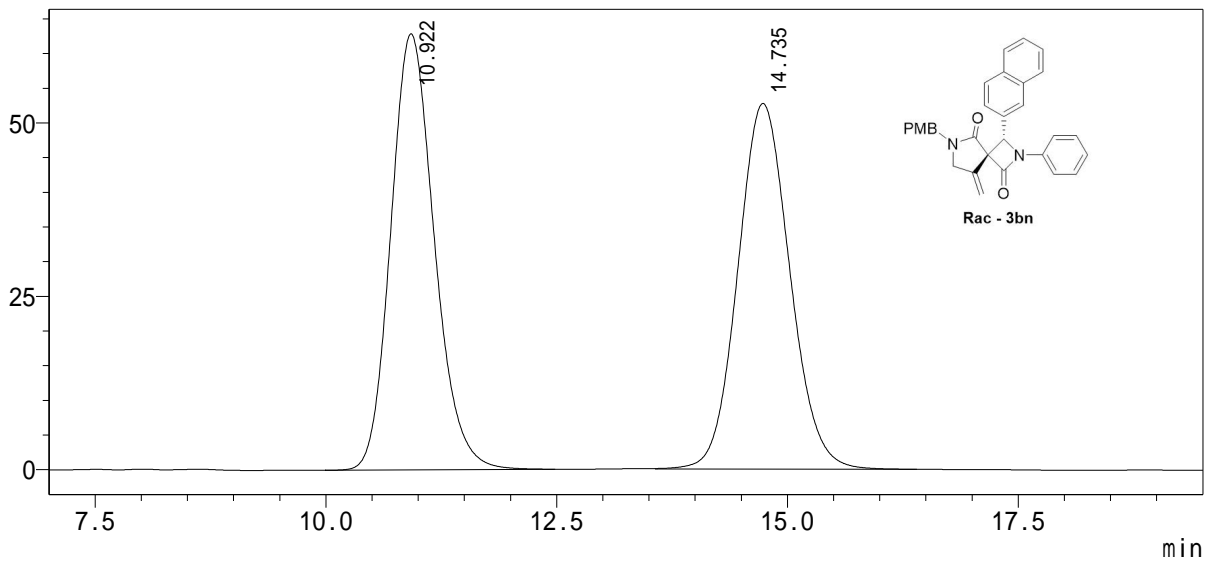

SPD-20A

| Entry | RT[min] | Area    | Height | Area%  |  |   |  |
|-------|---------|---------|--------|--------|--|---|--|
| 1     | 10.922  | 2062282 | 62885  | 49.971 |  |   |  |
| 2     | 14.735  | 2064694 | 52724  | 50.029 |  | V |  |
| Sum   |         | 4126976 | 115608 |        |  |   |  |





SHIMADZU

LabSolutions

## HPLC Replot

## &lt;Sample Information&gt;

Sample name : LSY-0819-315-B1-S-AS20%

Data name : LSY-0819-315-B1-S-AS20%.lcd

Acq. name : AS-H-20%.lcm

Location : 1-1  
: 1 uL

Sample Type : unknown

Ana. Date : 2023/8/19 16:13:40

Analyst : System Administrator

Pro. Date : 2024/6/19 17:04:11

Processor : System Administrator

mV

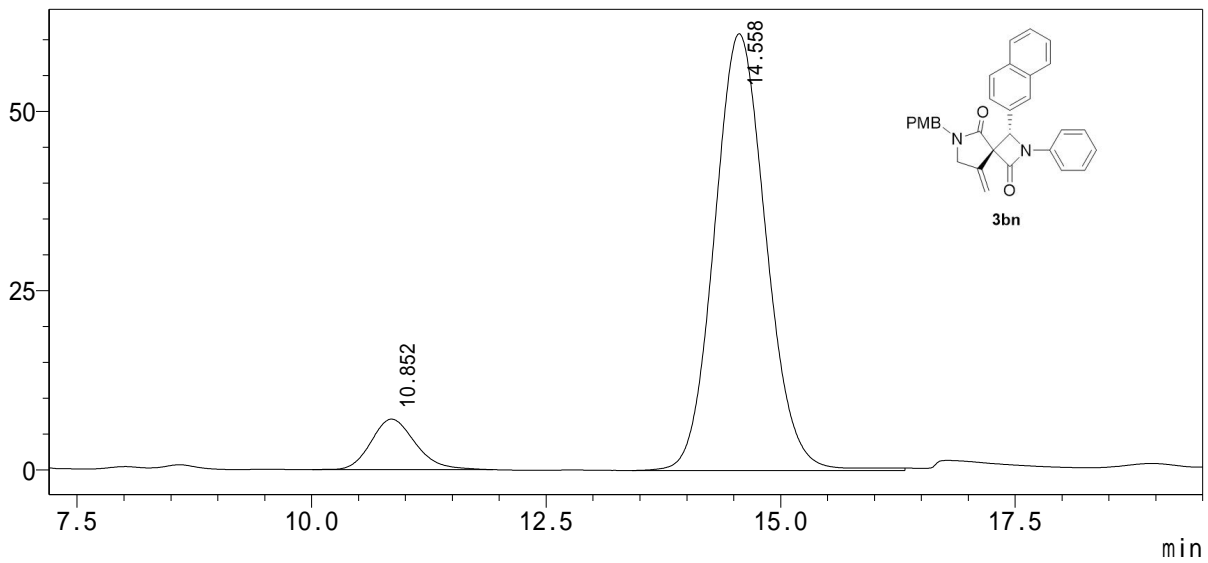

SPD-20A

| Entry | RT[min] | Area    | Height | Area%  |  |   |
|-------|---------|---------|--------|--------|--|---|
| 1     | 10.852  | 231957  | 7048   | 9.059  |  | M |
| 2     | 14.558  | 2328457 | 60919  | 90.941 |  | M |
| Sum   |         | 2560413 | 67968  |        |  |   |



SHIMADZU

LabSolutions

## HPLC Reprot

## &lt;Sample Information&gt;

Sample name : LSY-0726-302-A-AS20%-1  
Data name : LSY-0726-302-A-AS20%-1.lcd  
Acq. name : AS-H-20%.lcm  
Location : 1-1  
Sample Type : unknown  
Ana. Date : 2023/7/26 21:42:59  
Pro. Date : 2024/5/9 16:32:05  
Analyst : System Administrator  
Processor : System Administrator

mV

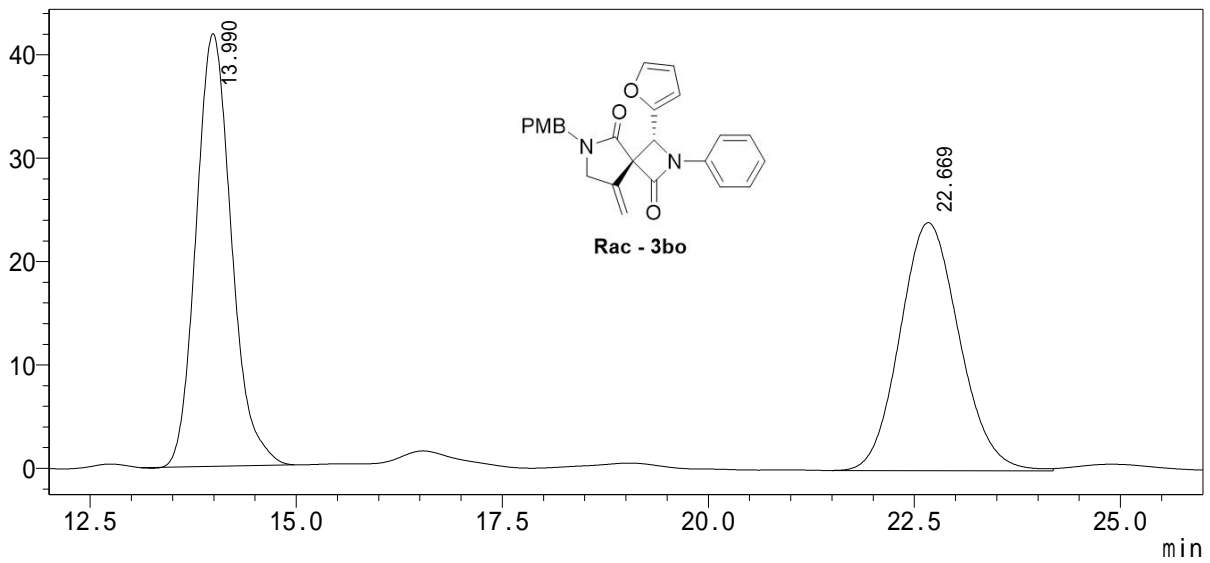

SPD-20A

| Entry | RT[min] | Area    | Height | Area%  |  |   |
|-------|---------|---------|--------|--------|--|---|
| 1     | 13.990  | 1248739 | 41847  | 50.983 |  | M |
| 2     | 22.669  | 1200607 | 23993  | 49.017 |  | M |
| Sum   |         | 2449345 | 65840  |        |  |   |



SHIMADZU

LabSolutions

# HPLC Reprot

## <Sample Information>

Sample name : LSY-0726-302-B-AS20%-1  
Data name : LSY-0726-302-B-AS20%-1.lcd  
Acq. name : AS-H-20%.lcm  
Location : 1-1  
Sample Type : unknown  
Ana. Date : 2023/7/26 19:24:42  
Analyst : System Administrator  
Pro. Date : 2023/8/23 16:04:15  
Processor : System Administrator

mV

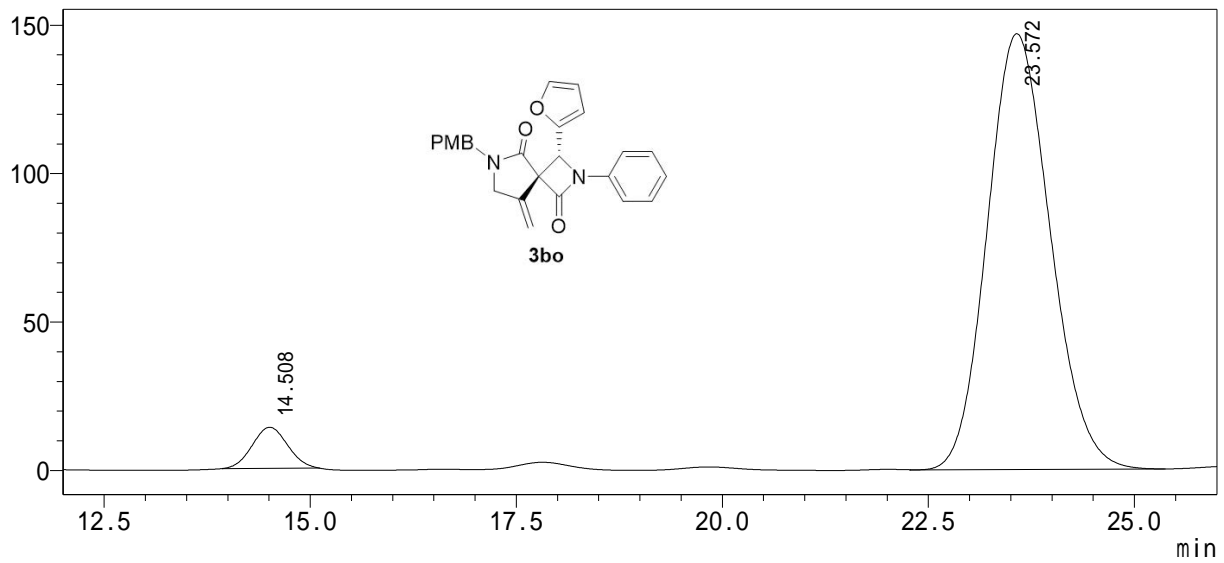

SPD-20A

| Entry | RT[min] | Area    | Height | Area%  |  |   |  |
|-------|---------|---------|--------|--------|--|---|--|
| 1     | 14.508  | 414084  | 13837  | 5.044  |  | M |  |
| 2     | 23.572  | 7795313 | 146769 | 94.956 |  | M |  |
| Sum   |         | 8209397 | 160606 |        |  |   |  |



SHIMADZU

LabSolutions

# HPLC Replot

## <Sample Information>

Sample name : LSY-1021-400-x-AS20%  
Data name : LSY-1021-400-x-AS20%.lcd  
Acq. name : AS-H-20%.lcm  
Location : 1-1  
Sample Type : unknown  
Ana. Date : 2023/10/21 15:09:38  
Pro. Date : 2023/10/30 22:02:58  
Analyst : System Administrator  
Processor : System Administrator

mV

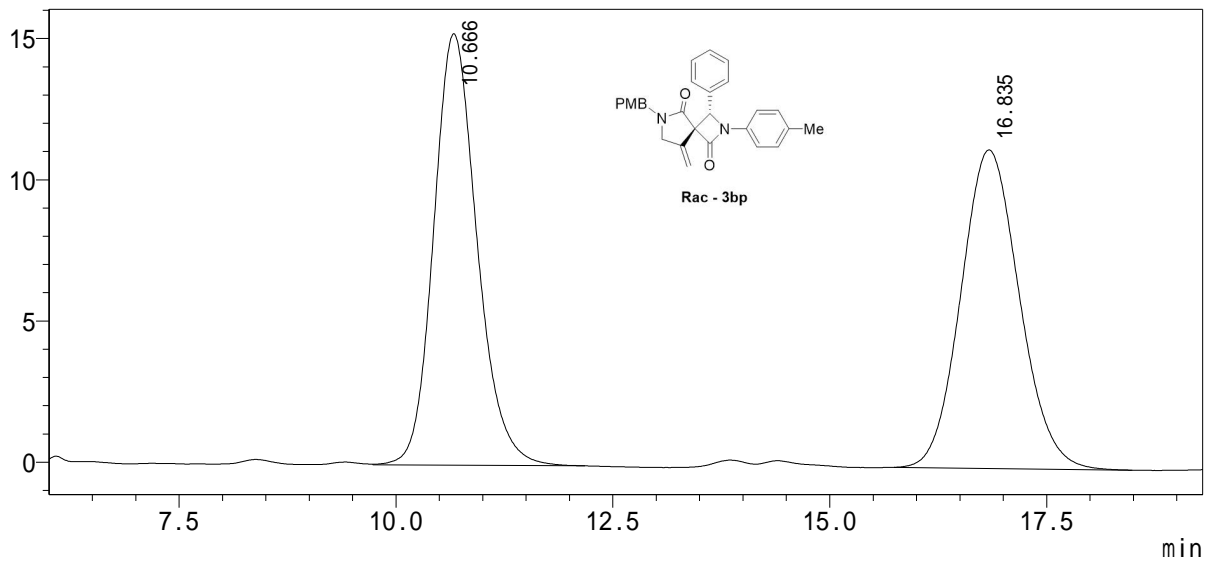

SPD-20A

| Entry | RT[min] | Area    | Height | Area%  |  |  |  |
|-------|---------|---------|--------|--------|--|--|--|
| 1     | 10.666  | 531538  | 15276  | 50.170 |  |  |  |
| 2     | 16.835  | 527929  | 11279  | 49.830 |  |  |  |
| Sum   |         | 1059468 | 26555  |        |  |  |  |



SHIMADZU

LabSolutions

# HPLC Replot

## <Sample Information>

Sample name : LSY-1024-406-S-AS20%  
Data name : LSY-1024-406-S-AS20%.lcd  
Acq. name : AS-H-20%.lcm  
Location : 1-1  
Sample Type : unknown  
Ana. Date : 2023/10/24 15:20:07  
Pro. Date : 2023/10/24 15:49:32  
Analyst : System Administrator  
Processor : System Administrator

mV

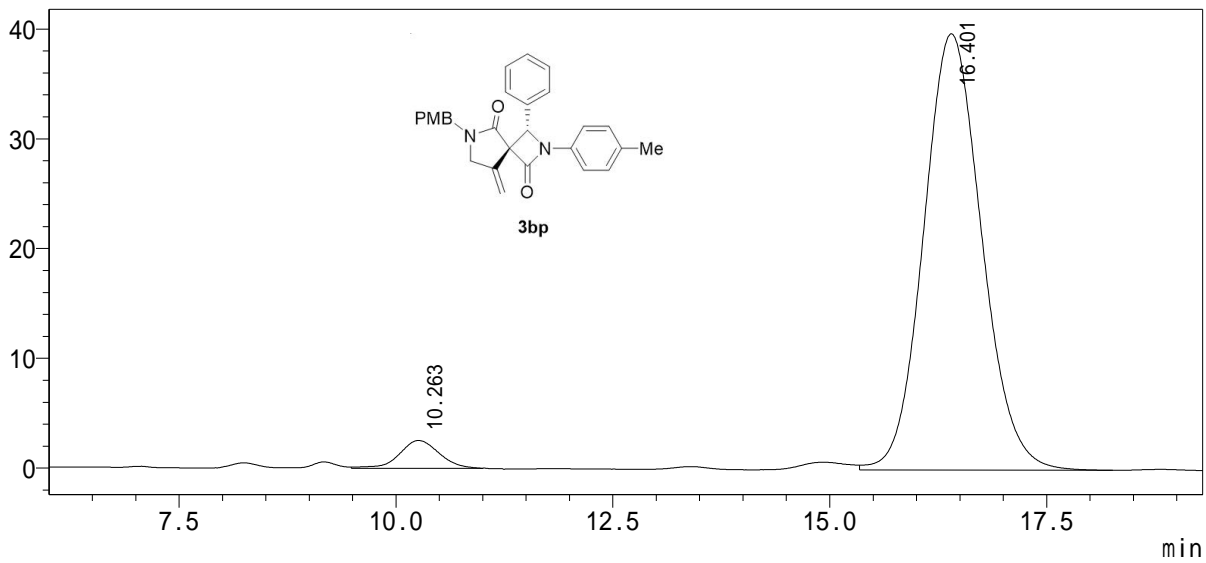

SPD-20A

| Entry | RT[min] | Area    | Height | Area%  |  |  |  |
|-------|---------|---------|--------|--------|--|--|--|
| 1     | 10.263  | 80586   | 2529   | 4.177  |  |  |  |
| 2     | 16.401  | 1848758 | 39749  | 95.823 |  |  |  |
| Sum   |         | 1929344 | 42278  |        |  |  |  |



SHIMADZU

LabSolutions

# HPLC Replot

## <Sample Information>

Sample name : LSY-11250ME-X-AS20%-1  
Data name : LSY-11250ME-X-AS20%-1.lcd  
Acq. name : AS-H-20%.lcm  
Location : 1-1  
Sample Type : unknown  
Ana. Date : 2023/11/25 19:53:50  
Pro. Date : 2023/12/10 15:33:29  
Analyst : System Administrator  
Processor : System Administrator

mV

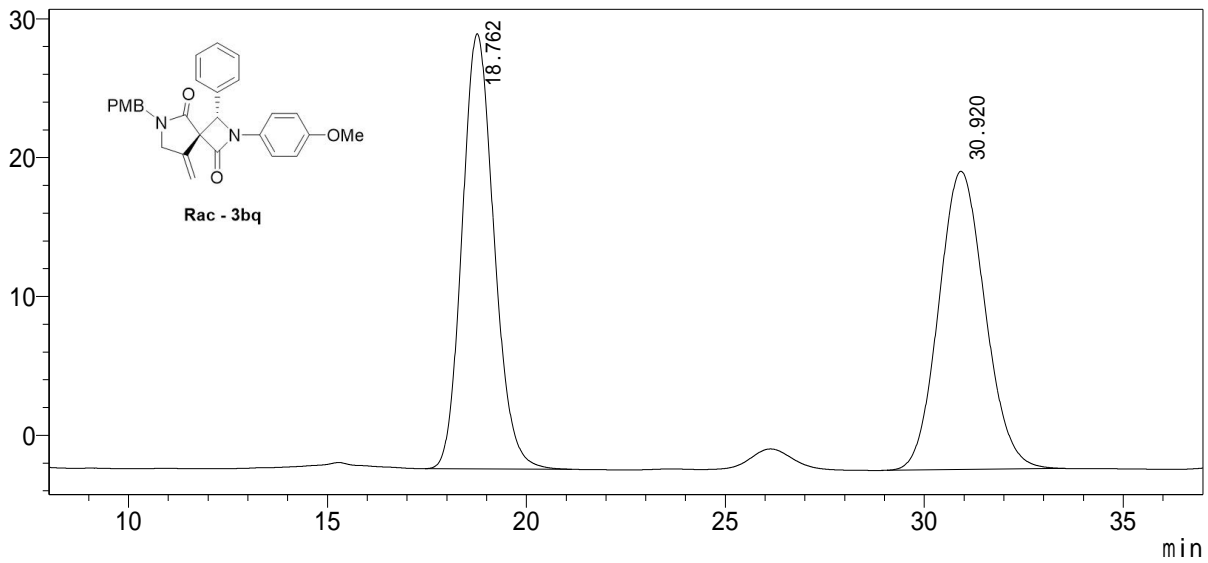

SPD-20A

| Entry | RT[min] | Area    | Height | Area%  |  |  |  |
|-------|---------|---------|--------|--------|--|--|--|
| 1     | 18.762  | 1747354 | 31336  | 50.160 |  |  |  |
| 2     | 30.920  | 1736237 | 21477  | 49.840 |  |  |  |
| Sum   |         | 3483591 | 52813  |        |  |  |  |



SHIMADZU

LabSolutions

# HPLC Replot

## <Sample Information>

Sample name : LSY-11250ME-S-AS20%-1  
Data name : LSY-11250ME-S-AS20%-1.lcd  
Acq. name : AS-H-20%.lcm  
Location : 1-1  
Sample Type : unknown  
Ana. Date : 2023/11/25 20:36:31  
Analyst : System Administrator  
Pro. Date : 2024/7/21 12:07:23  
Processor : System Administrator

mV

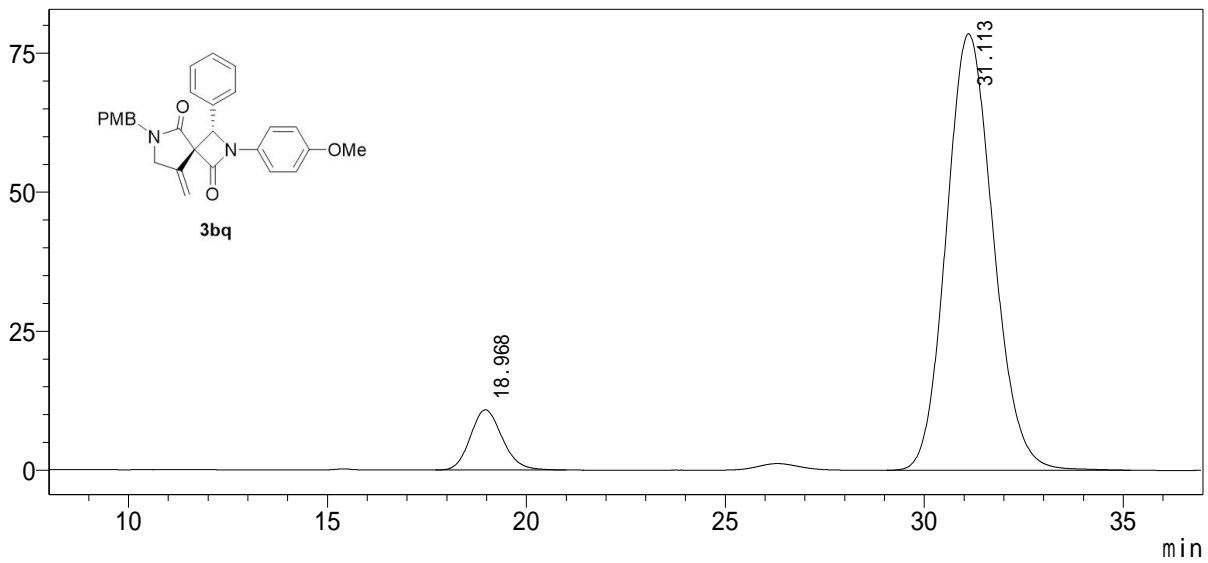

SPD-20A

| Entry | RT[min] | Area    | Height | Area%  |  |  |  |
|-------|---------|---------|--------|--------|--|--|--|
| 1     | 18.968  | 604231  | 10830  | 8.588  |  |  |  |
| 2     | 31.113  | 6431644 | 78512  | 91.412 |  |  |  |
| Sum   |         | 7035875 | 89343  |        |  |  |  |



SHIMADZU

LabSolutions

# HPLC Replot

## <Sample Information>

Sample name : ISY-1102-424-1-AS20 %  
Data name : ISY-1102-424-1-AS20 %.lcd  
Acq. name : AS-H-20%.lcm  
Location : 1-1  
Sample Type : unknown  
Ana. Date : 2023/11/2 16:56:57  
Pro. Date : 2023/11/2 17:18:32  
Analyst : System Administrator  
Processor : System Administrator

mV

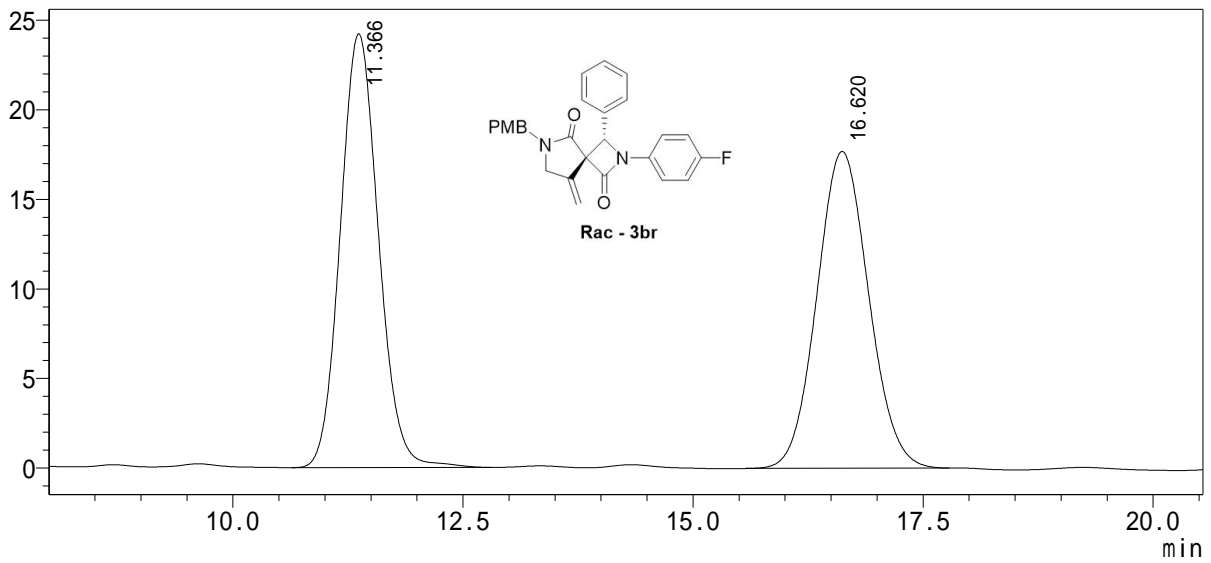

SPD-20A

| Entry | RT[min] | Area    | Height | Area%  |  |  |  |
|-------|---------|---------|--------|--------|--|--|--|
| 1     | 11.366  | 697632  | 24203  | 50.227 |  |  |  |
| 2     | 16.620  | 691332  | 17680  | 49.773 |  |  |  |
| Sum   |         | 1388964 | 41884  |        |  |  |  |





SHIMADZU

LabSolutions

# HPLC Replot

## <Sample Information>

Sample name :  
Data name : LSY-0923-366-B2-S-AS20%.lcd  
Acq. name : AS-H-20%.lcm  
Location : 1-1  
Sample Type : unknown  
Ana. Date : 2023/9/23 15:58:18  
Pro. Date : 2023/9/23 16:19:41  
Analyst : System Administrator  
Processor : System Administrator

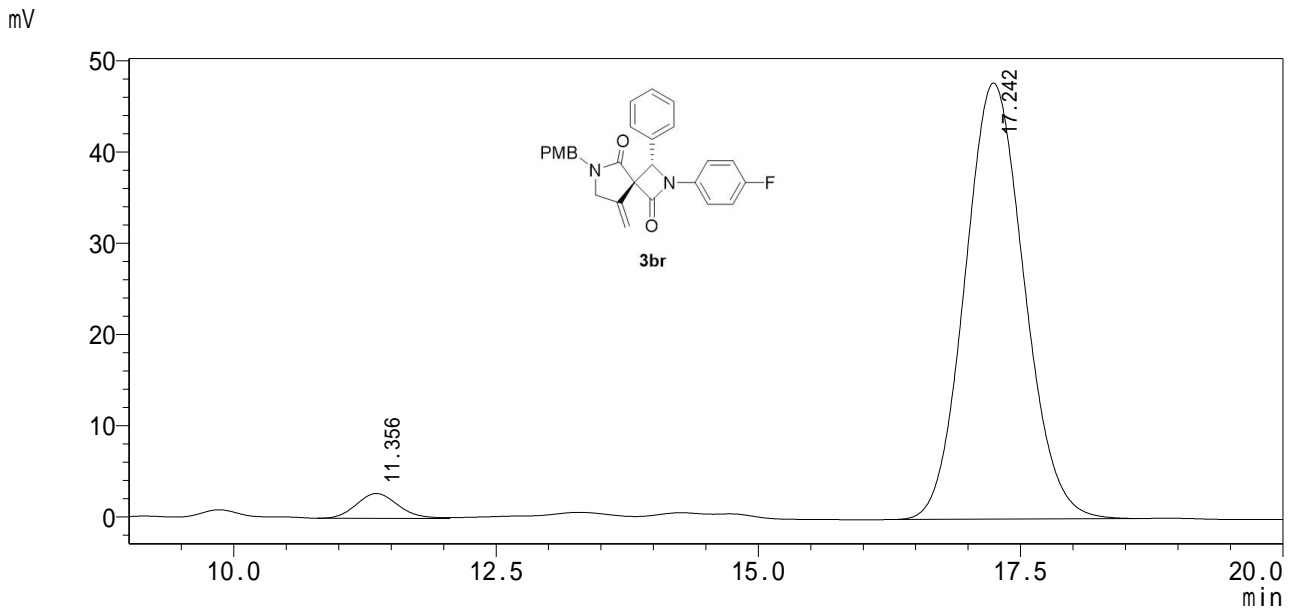

SPD-20A

| Entry | RT[min] | Area    | Height | Area%  |  |  |  |
|-------|---------|---------|--------|--------|--|--|--|
| 1     | 11.356  | 75652   | 2729   | 3.872  |  |  |  |
| 2     | 17.242  | 1878276 | 47820  | 96.128 |  |  |  |
| Sum   |         | 1953928 | 50549  |        |  |  |  |



SHIMADZU

LabSolutions

# HPLC Reprot

## <Sample Information>

Sample name : LSY-1125-393-X-AS20%-3  
              : LSY-1124-444-S-AS20%  
Data name   : LSY-1125-393-X-AS20%-3.lcd  
Acq. name   : AS-H-20%.lcm  
              :  
Location    : 1-1                              Sample Type : unknown  
              : 1 uL  
Ana. Date   : 2023/11/25 11:01:26          Analyst      : System Administrator  
Pro. Date   : 2024/5/9 14:30:08           Processor    : System Administrator

mV

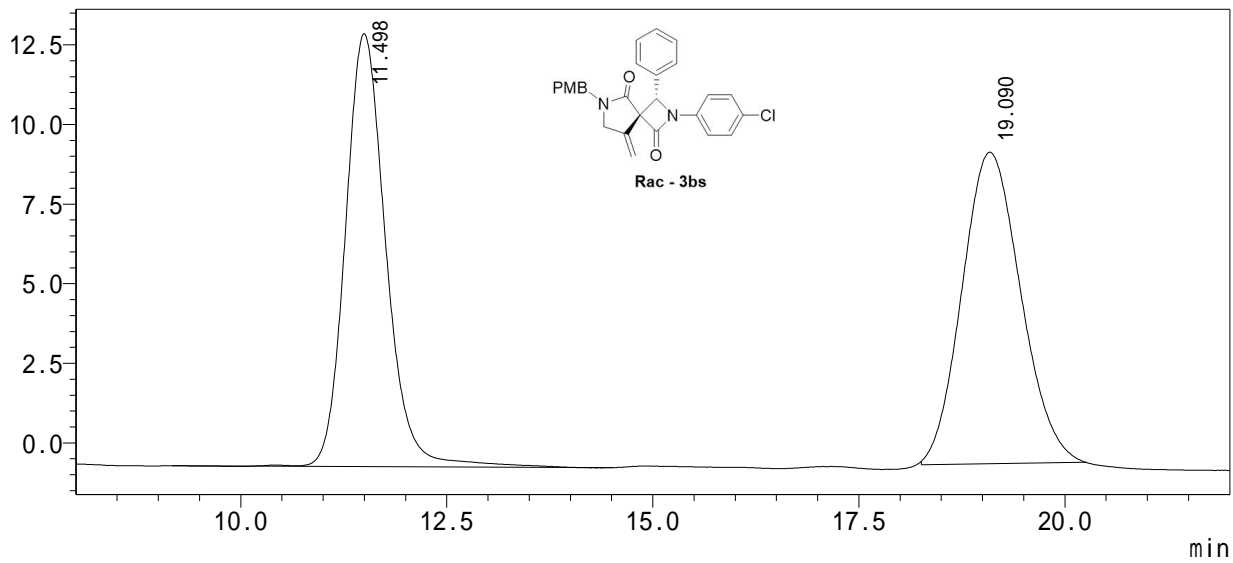

SPD-20A

| Entry | RT[min] | Area   | Height | Area%  |  |   |
|-------|---------|--------|--------|--------|--|---|
| 1     | 11.498  | 465180 | 13595  | 49.030 |  | M |
| 2     | 19.090  | 483588 | 9782   | 50.970 |  | M |
| Sum   |         | 948768 | 23377  |        |  |   |



SHIMADZU

LabSolutions

# HPLC Replot

## <Sample Information>

Sample name : LSY-1125-393-S-AS20%  
              : LSY-1124-444-S-AS20%  
Data name   : LSY-1125-393-S-AS20%.lcd  
Acq. name   : AS-H-20%.lcm  
              :  
Location    : 1-1  
              : 1 uL  
              :  
Ana. Date   : 2023/11/25 10:34:42  
Pro. Date   : 2023/11/25 14:29:04  
Sample Type : unknown  
Analyst     : System Administrator  
Processor    : System Administrator

mV

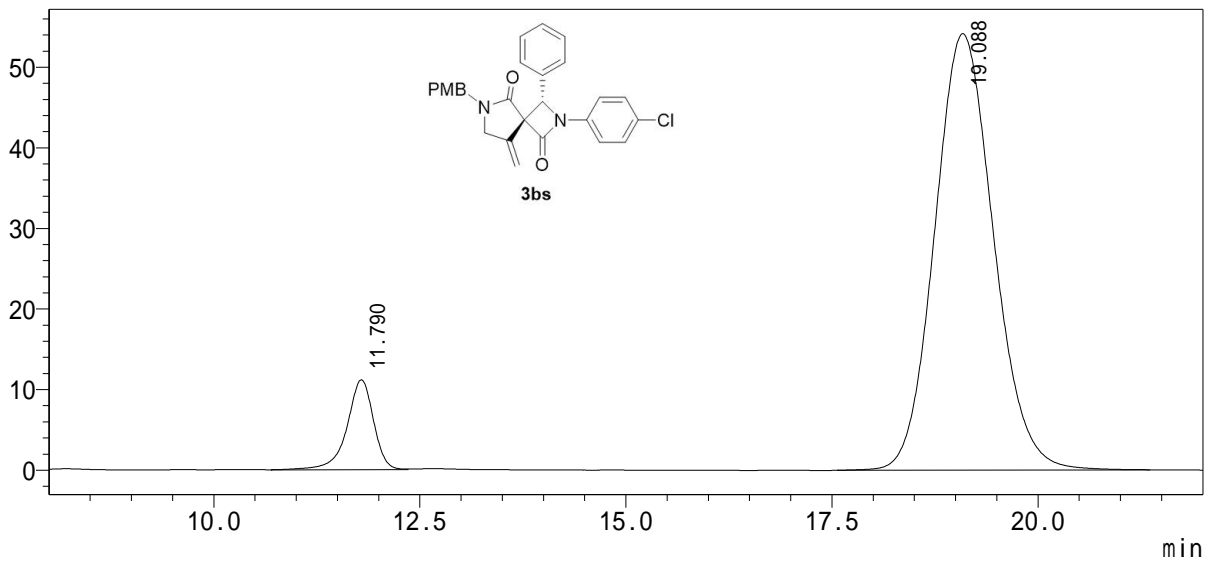

SPD-20A

| Entry | RT[min] | Area    | Height | Area%  |  |  |  |
|-------|---------|---------|--------|--------|--|--|--|
| 1     | 11.790  | 251576  | 11167  | 8.573  |  |  |  |
| 2     | 19.088  | 2682873 | 54139  | 91.427 |  |  |  |
| Sum   |         | 2934449 | 65306  |        |  |  |  |



SHIMADZU

LabSolutions

# HPLC Replot

## <Sample Information>

Sample name : LSY-1128-BR-N02-AS20%-X  
Data name : LSY-1128-BR-N02-AS20%-X.lcd  
Acq. name : AS-H-20%.lcm  
Location : 1-1  
Sample Type : unknown  
Ana. Date : 2023/11/28 10:23:27  
Pro. Date : 2024/5/18 14:57:53  
Analyst : System Administrator  
Processor : System Administrator

mV

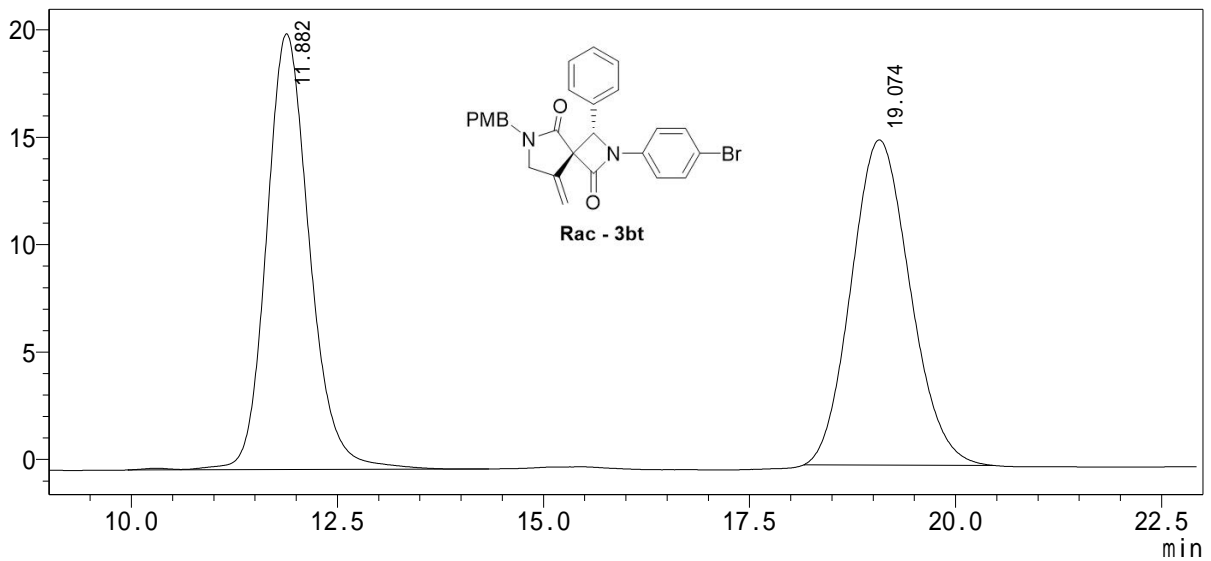

SPD-20A

| Entry | RT[min] | Area    | Height | Area%  |  |   |  |
|-------|---------|---------|--------|--------|--|---|--|
| 1     | 11.882  | 737699  | 20284  | 49.529 |  | M |  |
| 2     | 19.074  | 751715  | 15138  | 50.471 |  | M |  |
| Sum   |         | 1489414 | 35421  |        |  |   |  |



SHIMADZU

LabSolutions

# HPLC Replot

## <Sample Information>

Sample name : LSY-1125-BR-N02-AS20%-1  
Data name : LSY-1125-BR-N02-AS20%-1.lcd  
Acq. name : AS-H-20%.lcm  
Location : 1-1  
Sample Type : unknown  
Ana. Date : 2023/11/25 21:16:19  
Pro. Date : 2024/5/18 14:56:30  
Analyst : System Administrator  
Processor : System Administrator

mV

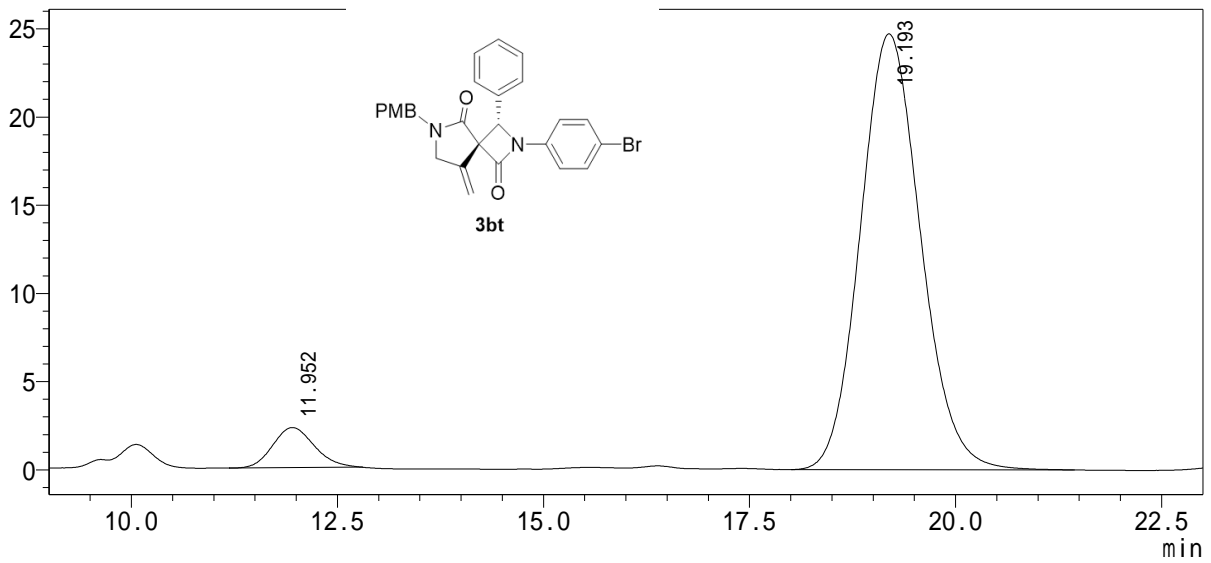

SPD-20A

| Entry | RT[min] | Area    | Height | Area%  |  |   |
|-------|---------|---------|--------|--------|--|---|
| 1     | 11.952  | 80296   | 2276   | 6.006  |  | M |
| 2     | 19.193  | 1256654 | 24716  | 93.994 |  |   |
| Sum   |         | 1336950 | 26992  |        |  |   |



SHIMADZU

LabSolutions

## HPLC Replot

## &lt;Sample Information&gt;

Sample name : LSY-1128-CF3-N02-AS20%-X1  
Data name : LSY-1128-CF3-N02-AS20%-X1.lcd  
Acq. name : AS-H-20%.lcm  
Location : 1-1  
Sample Type : unknown  
Ana. Date : 2023/11/28 16:42:44  
Pro. Date : 2024/5/9 14:30:17  
Analyst : System Administrator  
Processor : System Administrator

mV

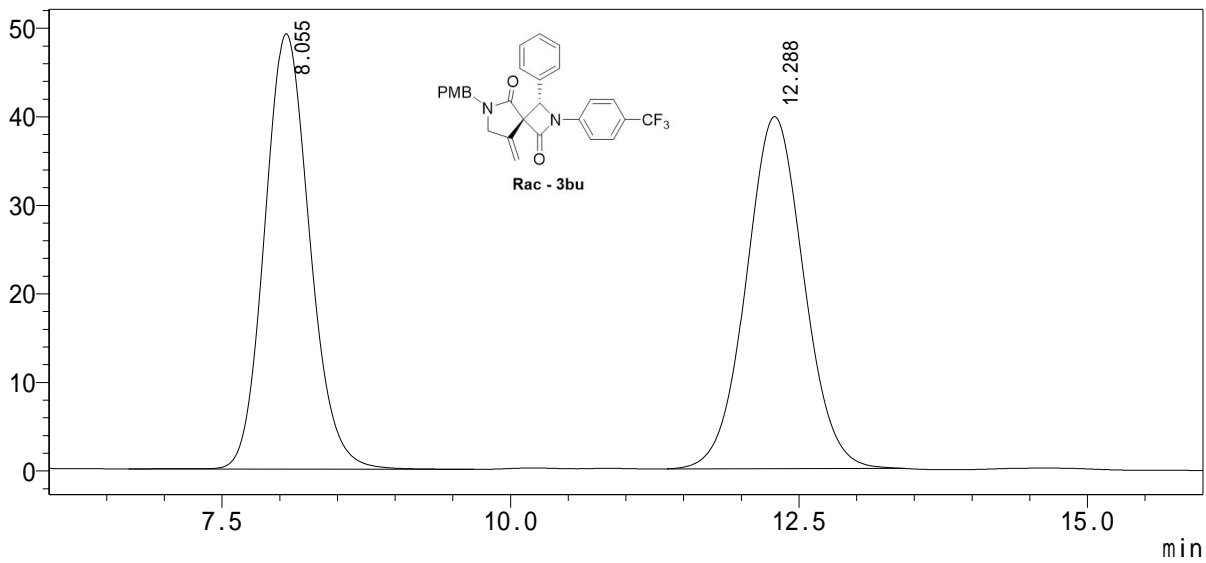

SPD-20A

| Entry | RT[min] | Area    | Height | Area%  |  |   |
|-------|---------|---------|--------|--------|--|---|
| 1     | 8.055   | 1333635 | 49190  | 49.132 |  | M |
| 2     | 12.288  | 1380764 | 39770  | 50.868 |  | M |
| Sum   |         | 2714398 | 88960  |        |  |   |



SHIMADZU

LabSolutions

# HPLC Replot

## <Sample Information>

Sample name : LSY-1202-CF3-N02-S-AS20%  
Data name : LSY-1202-CF3-N02-S-AS20%.lcd  
Acq. name : AS-H-20%.lcm  
Location : 1-1  
Sample Type : unknown  
Ana. Date : 2023/12/2 16:38:06  
Analyst : System Administrator  
Pro. Date : 2023/12/2 16:59:00  
Processor : System Administrator

mV

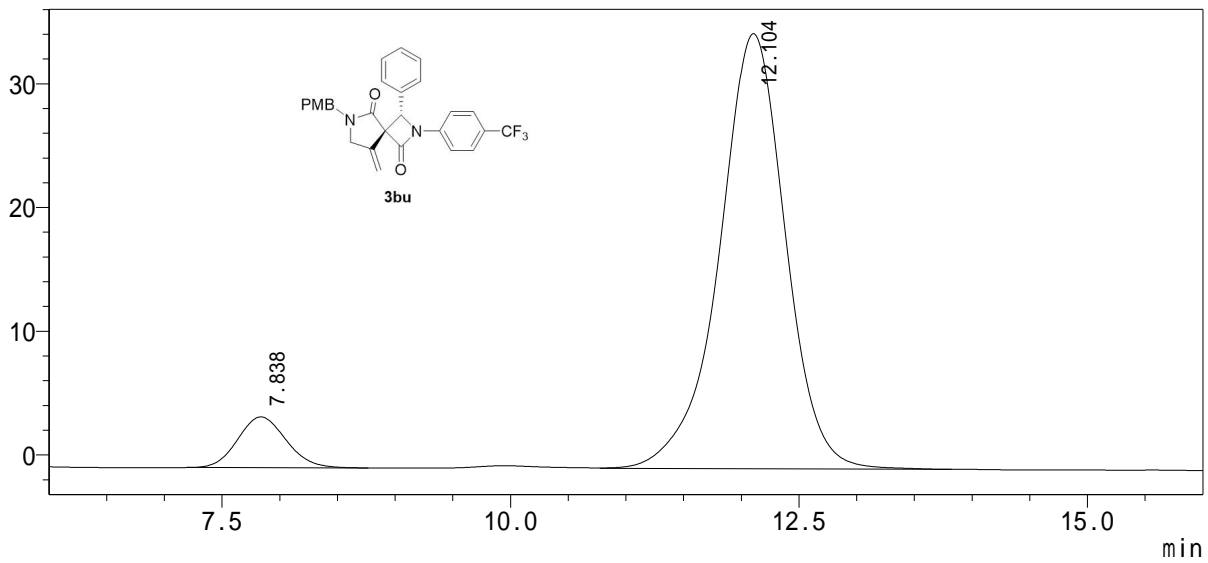

SPD-20A

| Entry | RT[min] | Area    | Height | Area%  |  |  |  |
|-------|---------|---------|--------|--------|--|--|--|
| 1     | 7.838   | 119508  | 4104   | 7.874  |  |  |  |
| 2     | 12.104  | 1398251 | 35158  | 92.126 |  |  |  |
| Sum   |         | 1517759 | 39262  |        |  |  |  |



SHIMADZU

LabSolutions

# HPLC Reprot

## <Sample Information>

Sample name : Isy-3-ME-NO2-1006-X-AS20%  
              : Isy-3-ME-NO2-1006-X-AS20%  
Data name   : Isy-3-ME-NO2-1006-X-AS20%.lcd  
Acq. name   : AS-H-20%.lcm  
              :  
Location    : 1-1                              Sample Type : unknown  
              : 1 uL  
Ana. Date   : 2024/10/6 19:49:52          Analyst      : System Administrator  
Pro. Date   : 2024/10/6 20:05:49          Processor    : System Administrator

mV

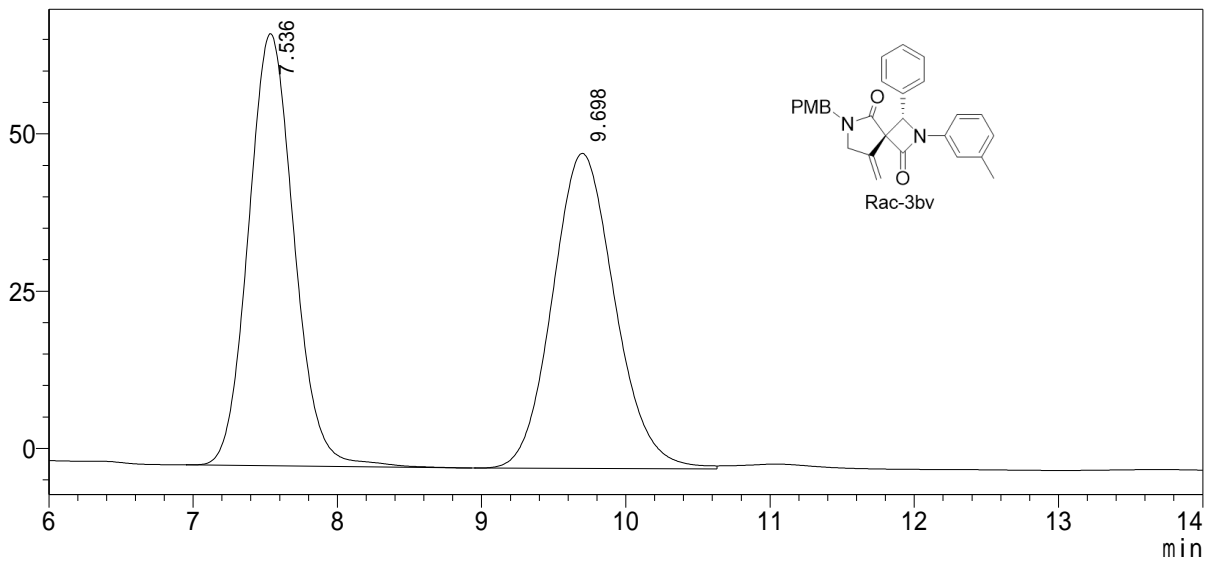

SPD-20A

| Entry | RT[min] | Area    | Height | Area%  |  |  |  |
|-------|---------|---------|--------|--------|--|--|--|
| 1     | 7.536   | 1511038 | 68696  | 50.122 |  |  |  |
| 2     | 9.698   | 1503675 | 50085  | 49.878 |  |  |  |
| Sum   |         | 3014713 | 118781 |        |  |  |  |





SHIMADZU

LabSolutions

# HPLC Reprot

## <Sample Information>

Sample name : Isy-3-ME-NO2-1006-S-AS20%  
              : Isy-3-ME-NO2-1006-S-AS20%  
Data name   : Isy-3-ME-NO2-1006-S-AS20%.lcd  
Acq. name   : AS-H-20%.lcm  
              :  
Location    : 1-1                              Sample Type : unknown  
              : 1 uL  
Ana. Date   : 2024/10/6 20:07:08          Analyst      : System Administrator  
Pro. Date   : 2024/10/7 17:36:18          Processor    : System Administrator

mV

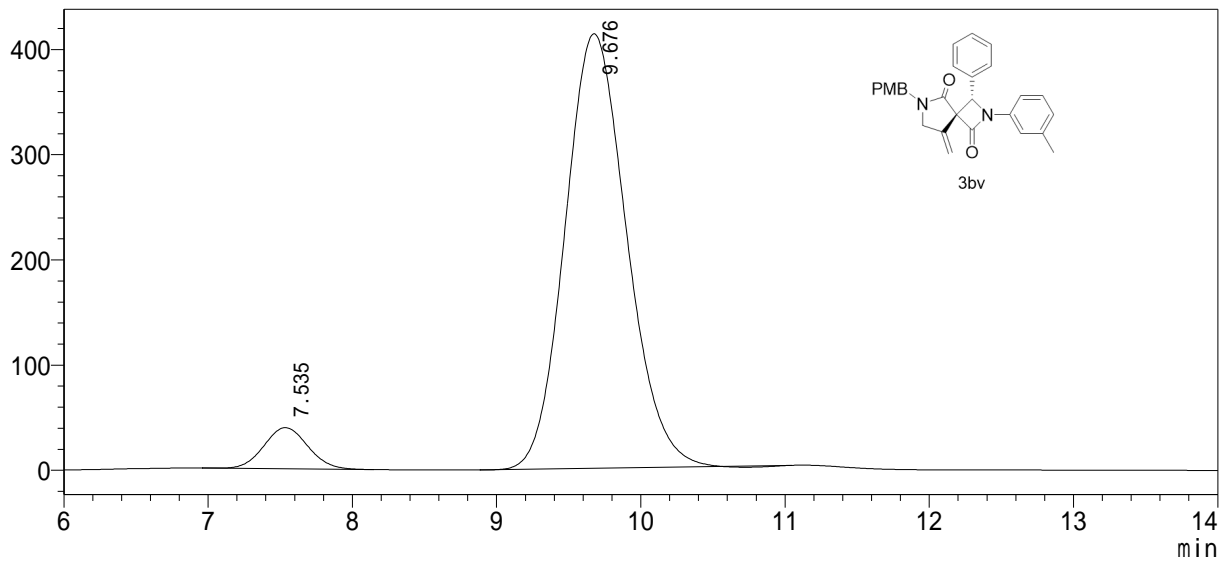

SPD-20A

| Entry | RT[min] | Area     | Height | Area%  |  |   |
|-------|---------|----------|--------|--------|--|---|
| 1     | 7.535   | 831201   | 39149  | 6.366  |  | M |
| 2     | 9.676   | 12224808 | 413109 | 93.634 |  | M |
| sum   |         | 13056009 | 452258 |        |  |   |



SHIMADZU

LabSolutions

# HPLC Replot

## <Sample Information>

Sample name : Isy-2-ME-NO2-1006-X-AS20%  
              : Isy-2-ME-NO2-1006-X-AS20%  
Data name   : Isy-2-ME-NO2-1006-X-AS20%.lcd  
Acq. name   : AS-H-20%.lcm  
              :  
Location    : 1-1                              Sample Type : unknown  
              : 1 uL  
Ana. Date   : 2024/10/6 20:25:07              Analyst      : System Administrator  
Pro. Date   : 2024/10/9 17:22:42              Processor    : System Administrator

mV

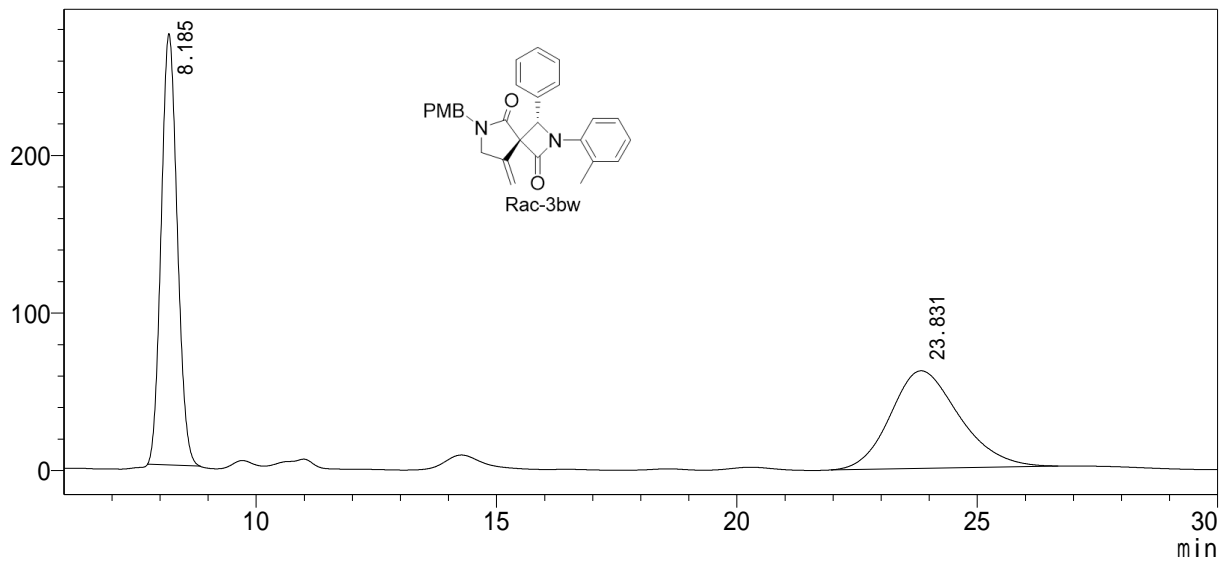

SPD-20A

| Entry | RT[min] | Area     | Height | Area%  |  |   |  |
|-------|---------|----------|--------|--------|--|---|--|
| 1     | 8.185   | 6369620  | 273691 | 50.766 |  | M |  |
| 2     | 23.831  | 6177375  | 61933  | 49.234 |  | M |  |
| Sum   |         | 12546996 | 335624 |        |  |   |  |



SHIMADZU

LabSolutions

# HPLC Replot

## <Sample Information>

Sample name : LSY-2-ME-S-1007-AS20%  
              : LSY-2-ME-S-1007-AS20%  
Data name   : LSY-2-ME-S-1007-AS20%.lcd  
Acq. name   : AS-H-20%.lcm  
              :  
Location    : 1-1  
              : 1 uL  
Ana. Date   : 2024/10/7 17:24:24  
Pro. Date   : 2024/10/7 18:07:56  
Sample Type : unknown  
Analyst     : System Administrator  
Processor    : System Administrator

mV

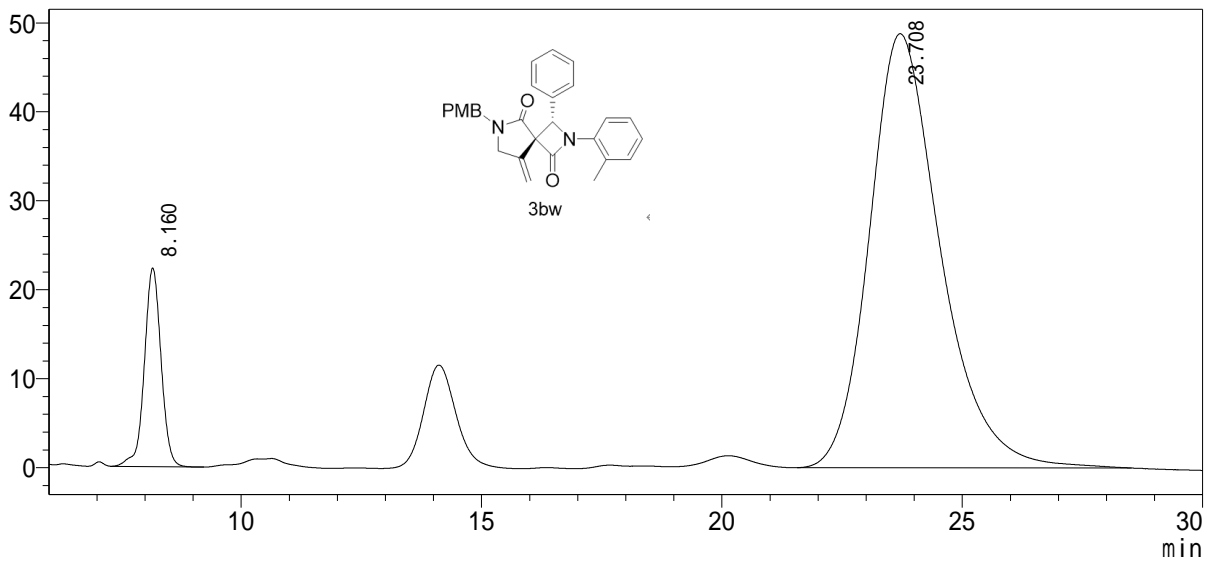

SPD-20A

| Entry | RT[min] | Area    | Height | Area%  |  |   |  |
|-------|---------|---------|--------|--------|--|---|--|
| 1     | 8.160   | 541172  | 22340  | 9.753  |  | M |  |
| 2     | 23.708  | 5007330 | 48798  | 90.247 |  |   |  |
| Sum   |         | 5548502 | 71138  |        |  |   |  |



SHIMADZU

LabSolutions

# HPLC Reprot

## <Sample Information>

Sample name : LSY-FBD-X-1007-AS20%  
              : LSY-FBD-X-1007-AS20%  
Data name   : LSY-FBD-X-1007-AS20%.lcd  
Acq. name   : AS-H-20%.lcm  
              :  
Location    : 1-1                               Sample Type : unknown  
              : 1 uL  
Ana. Date   : 2024/10/7 16:32:41            Analyst      : System Administrator  
Pro. Date   : 2024/10/7 18:39:22            Processor    : System Administrator

mV

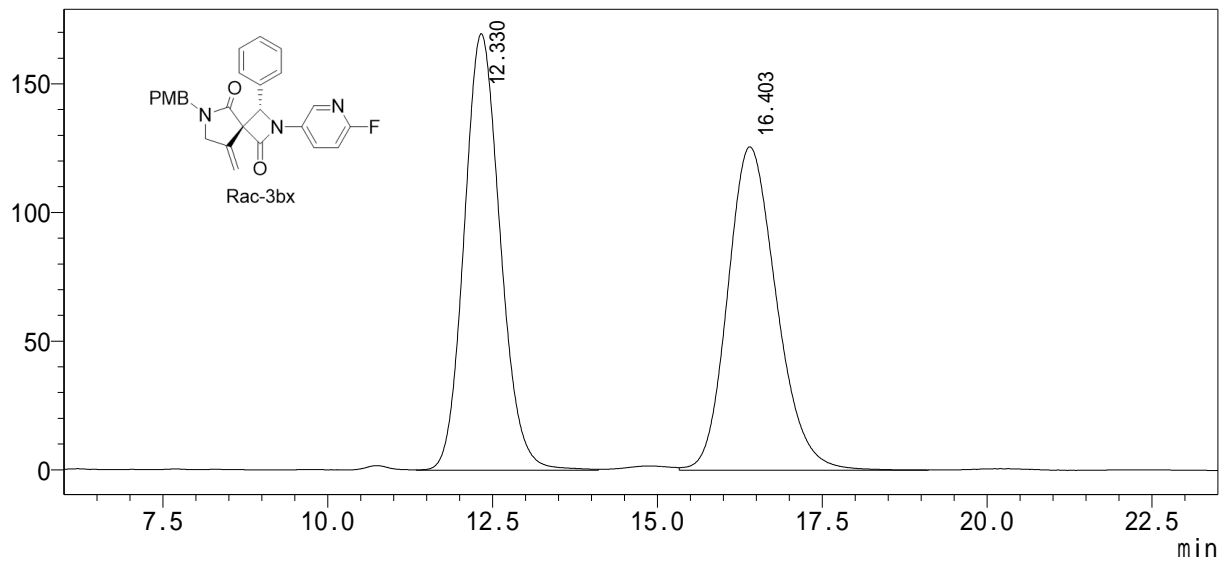

SPD-20A

| Entry | RT[min] | Area     | Height | Area%  |  |   |  |
|-------|---------|----------|--------|--------|--|---|--|
| 1     | 12.330  | 6451298  | 169605 | 49.953 |  |   |  |
| 2     | 16.403  | 6463488  | 125683 | 50.047 |  | S |  |
| Sum   |         | 12914786 | 295288 |        |  |   |  |



SHIMADZU

LabSolutions

# HPLC Reprot

## <Sample Information>

Sample name : LSY-FBD-1-S-1007-AS20%  
              : LSY-FBD-1-S-1007-AS20%  
Data name   : LSY-FBD-1-S-1007-AS20%.lcd  
Acq. name   : AS-H-20%.lcm  
              :  
Location    : 1-1                                 Sample Type : unknown  
              : 1 uL  
Ana. Date   : 2024/10/7 18:25:16             Analyst      : System Administrator  
Pro. Date   : 2024/10/7 18:55:19             Processor    : System Administrator

mV

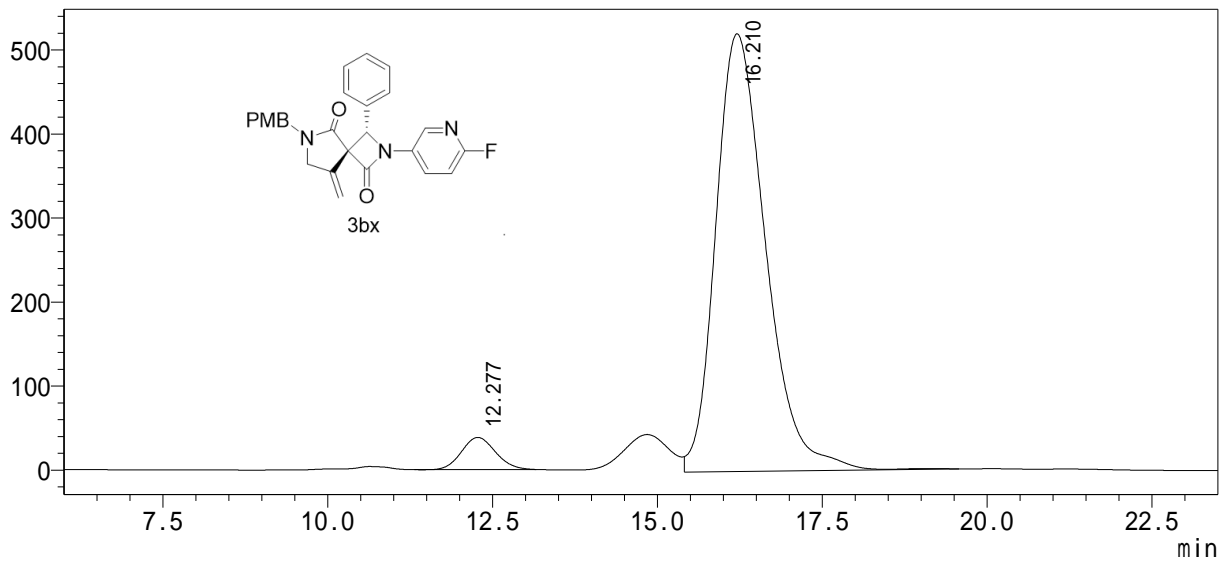

SPD-20A

| Entry | RT[min] | Area     | Height | Area%  |  |   |  |
|-------|---------|----------|--------|--------|--|---|--|
| 1     | 12.277  | 1369989  | 38245  | 4.762  |  | M |  |
| 2     | 16.210  | 27397216 | 520975 | 95.238 |  | M |  |
| Sum   |         | 28767205 | 559220 |        |  |   |  |



SHIMADZU

LabSolutions

# HPLC Reprot

## <Sample Information>

Sample name : ISY-1107-433-X-AS20 %  
Data name : ISY-1107-433-X-AS20 %.lcd  
Acq. name : AS-H-20%.lcm  
Location : 1-1  
Sample Type : unknown  
Ana. Date : 2023/11/7 9:54:41  
Pro. Date : 2024/5/30 16:41:34  
Analyst : System Administrator  
Processor : System Administrator

mV

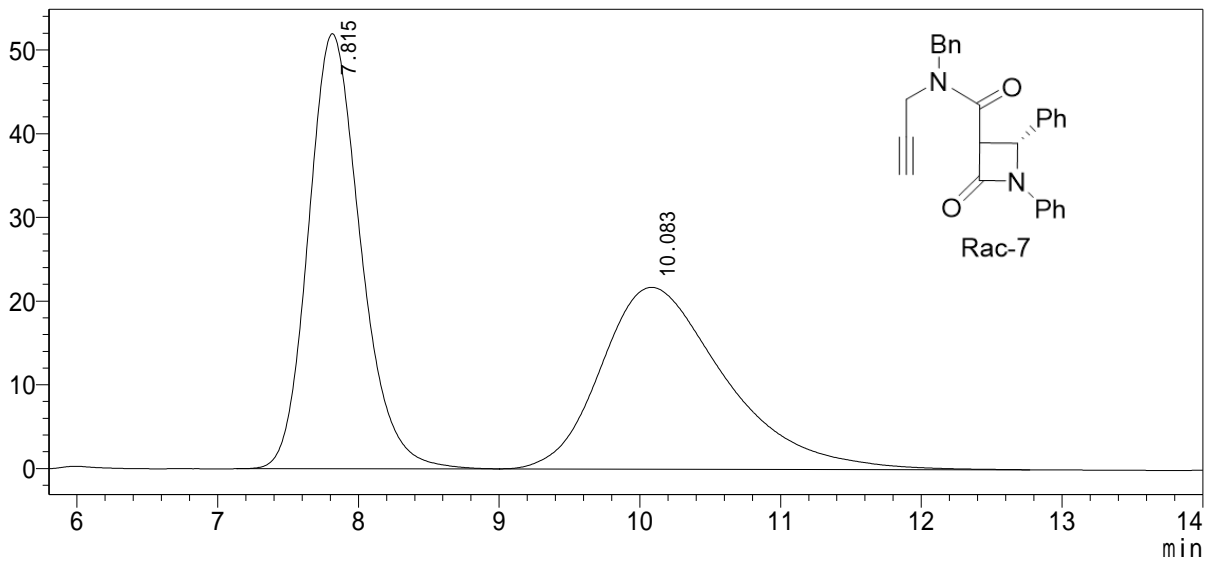

SPD-20A

| Entry | RT[min] | Area    | Height | Area%  |  |  |  |
|-------|---------|---------|--------|--------|--|--|--|
| 1     | 7.815   | 1341278 | 51977  | 50.201 |  |  |  |
| 2     | 10.083  | 1330527 | 21714  | 49.799 |  |  |  |
| Sum   |         | 2671805 | 73690  |        |  |  |  |



SHIMADZU

LabSolutions

# HPLC Reprot

## <Sample Information>

Sample name : ISY-1107-434-S1-AS20 %  
Data name : ISY-1107-434-S1-AS20 %.lcd  
Acq. name : AS-H-20%.lcm  
Location : 1-1  
Sample Type : unknown  
Ana. Date : 2023/11/7 10:14:21  
Analyst : System Administrator  
Pro. Date : 2023/12/9 15:24:28  
Processor : System Administrator

mV

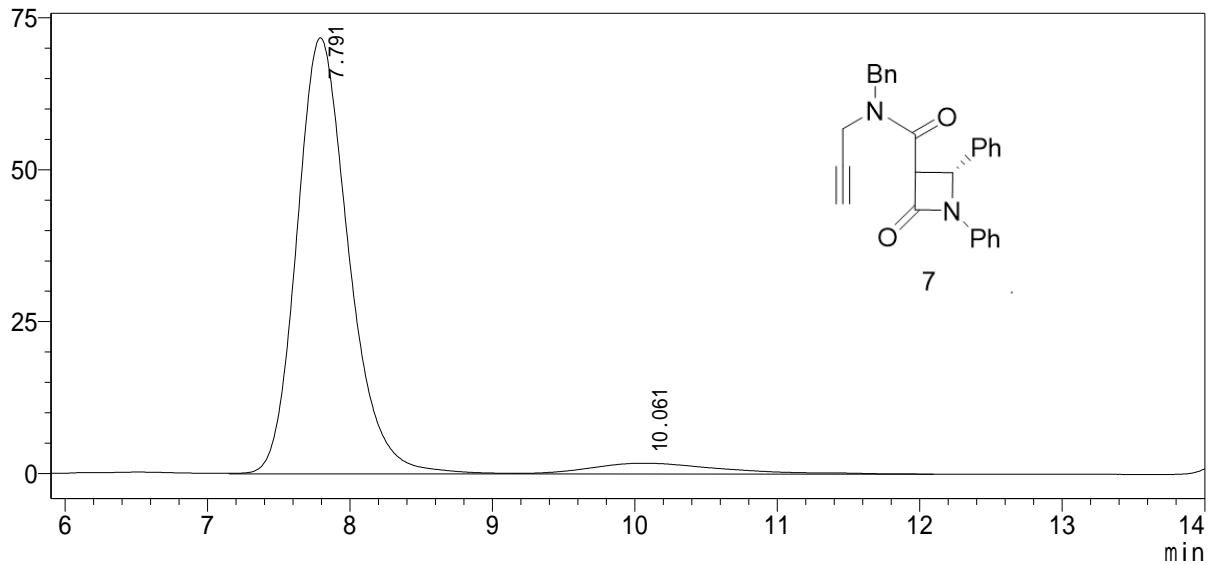

SPD-20A

| Entry | RT[min] | Area    | Height | Area%  |   |  |
|-------|---------|---------|--------|--------|---|--|
| 1     | 7.791   | 1810659 | 71746  | 94.145 |   |  |
| 2     | 10.061  | 112612  | 1775   | 5.855  | V |  |
| Sum   |         | 1923270 | 73521  |        |   |  |



SHIMADZU

LabSolutions

## HPLC Replot

## &lt;Sample Information&gt;

Sample name : LSY-1203-ALCL3-X-AD1%-1

Data name : LSY-1203-ALCL3-X-AD1%-1.lcd

Acq. name : AD-1%.lcm

Location : 1-1  
: 1 uL

Sample Type : unknown

Ana. Date : 2023/12/3 12:33:11

Analyst : System Administrator

Pro. Date : 2024/7/7 15:01:10

Processor : System Administrator

mV

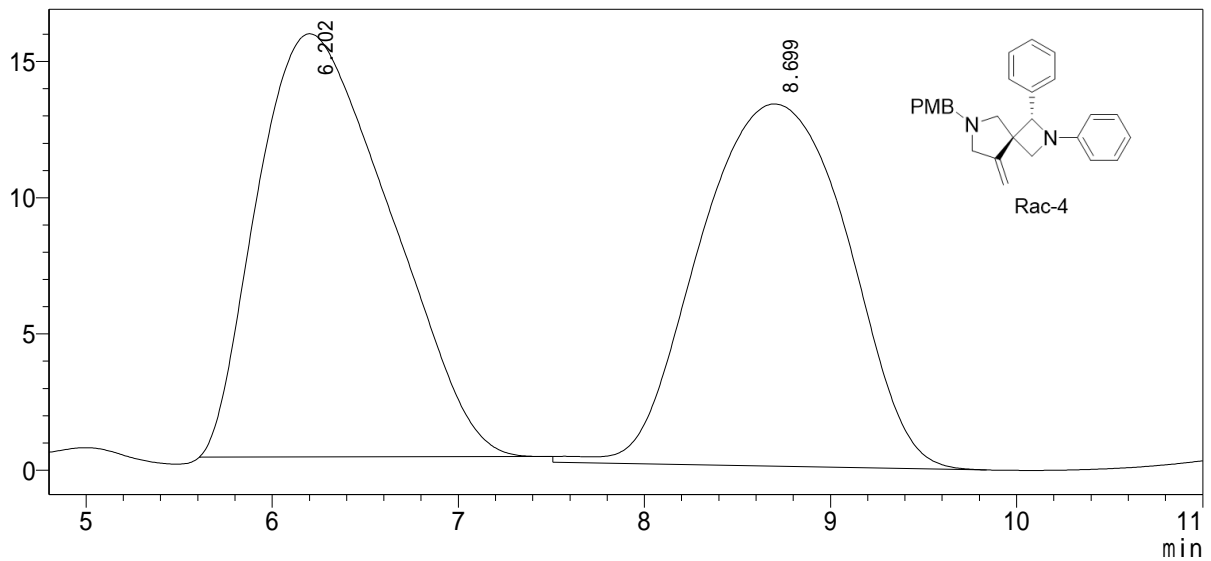

SPD-20A

| Entry | RT[min] | Area    | Height | Area%  |  |   |  |
|-------|---------|---------|--------|--------|--|---|--|
| 1     | 6.202   | 766693  | 15536  | 50.926 |  | M |  |
| 2     | 8.699   | 738802  | 13296  | 49.074 |  | M |  |
| Sum   |         | 1505496 | 28832  |        |  |   |  |





SHIMADZU

LabSolutions

## HPLC Reprot

## &lt;Sample Information&gt;

Sample name : ALCL3-1204-S-AD1%

Data name : ALCL3-1204-S-AD1%.lcd

Acq. name : AD-1%.lcm

Location : 1-1  
: 1 uL

Sample Type : unknown

Ana. Date : 2023/12/4 9:52:38

Analyst : System Administrator

Pro. Date : 2024/7/8 8:57:32

Processor : System Administrator

mV

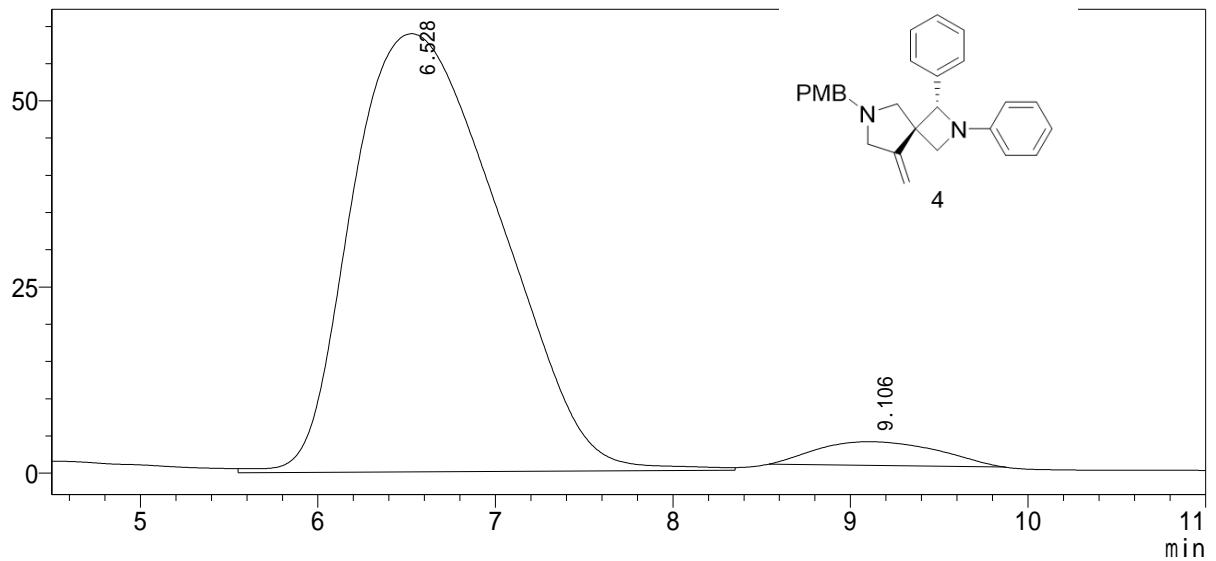

SPD-20A

| Entry | RT[min] | Area    | Height | Area%  |  |   |
|-------|---------|---------|--------|--------|--|---|
| 1     | 6.528   | 3400382 | 58848  | 95.709 |  | M |
| 2     | 9.106   | 152471  | 3173   | 4.291  |  | M |
| Sum   |         | 3552852 | 62021  |        |  |   |



SHIMADZU

LabSolutions

# HPLC Replot

## <Sample Information>

Sample name : lsy-1121-444-x-as20%  
              : KM010XX-ADH-80B  
Data name   : lsy-1121-444-x-as20%.lcd  
Acq. name   : AS-H-20%.lcm  
              :  
Location    : 1-1  
              : 1 uL  
              : 1 uL  
Ana. Date   : 2023/11/21 19:29:49  
Pro. Date   : 2023/12/9 15:31:28  
Sample Type : unknown  
Analyst     : System Administrator  
Processor    : System Administrator

mV

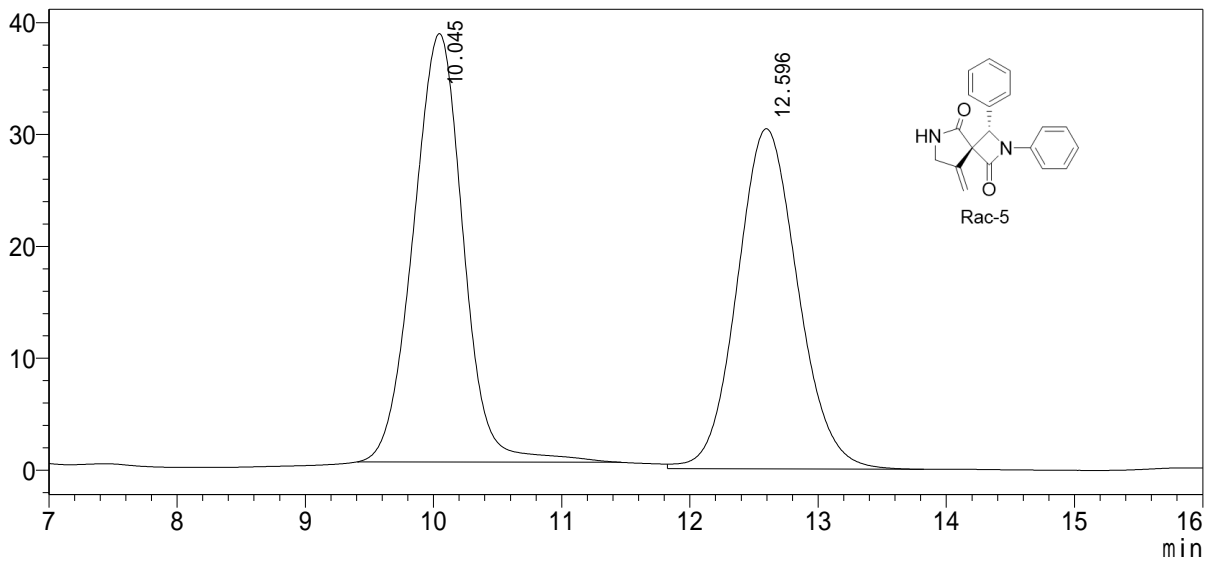

SPD-20A

| Entry | RT[min] | Area    | Height | Area%  |  |   |  |
|-------|---------|---------|--------|--------|--|---|--|
| 1     | 10.045  | 1037346 | 38282  | 50.891 |  | M |  |
| 2     | 12.596  | 1001014 | 30408  | 49.109 |  |   |  |
| Sum   |         | 2038360 | 68690  |        |  |   |  |



SHIMADZU

LabSolutions

## HPLC Reprot

## &lt;Sample Information&gt;

Sample name : LSY-1124-444-S-AS20%-4  
              : LSY-1124-444-S-AS20%  
Data name   : LSY-1124-444-S-AS20%-4.lcd  
Acq. name   : AS-H-20%.lcm  
              :  
Location    : 1-1                              Sample Type : unknown  
              : 1 uL  
Ana. Date   : 2023/11/24 18:28:06          Analyst      : System Administrator  
Pro. Date   : 2023/11/25 9:10:52          Processor    : System Administrator

mV

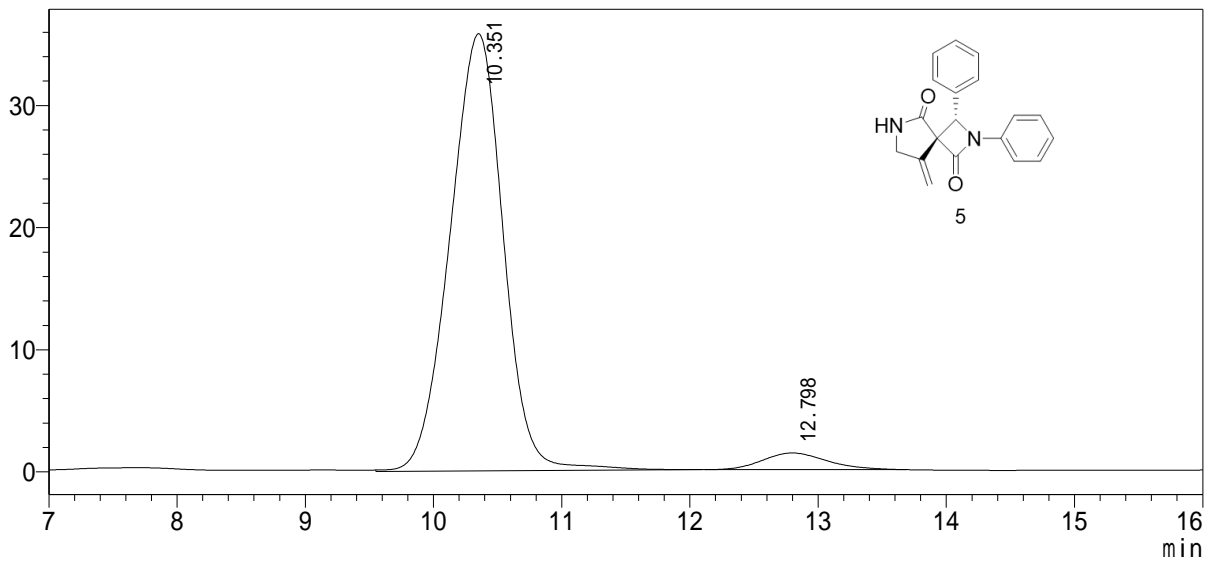

SPD-20A

| Entry | RT[min] | Area    | Height | Area%  |  |   |
|-------|---------|---------|--------|--------|--|---|
| 1     | 10.351  | 1032827 | 35791  | 95.552 |  | M |
| 2     | 12.798  | 48075   | 1369   | 4.448  |  | M |
| Sum   |         | 1080902 | 37160  |        |  |   |



SHIMADZU

LabSolutions

# HPLC Replot

## <Sample Information>

Sample name : LSY-1212-450-X-AS20%  
 Data name : LSY-1212-450-X-AS20%.lcd  
 Acq. name : AS-H-20%.lcm  
 Location : 1-1  
 Ana. Date : 2023/12/12 14:40:03  
 Pro. Date : 2024/5/9 15:32:04  
 Sample Type : unknown  
 Analyst : System Administrator  
 Processor : System Administrator

mV

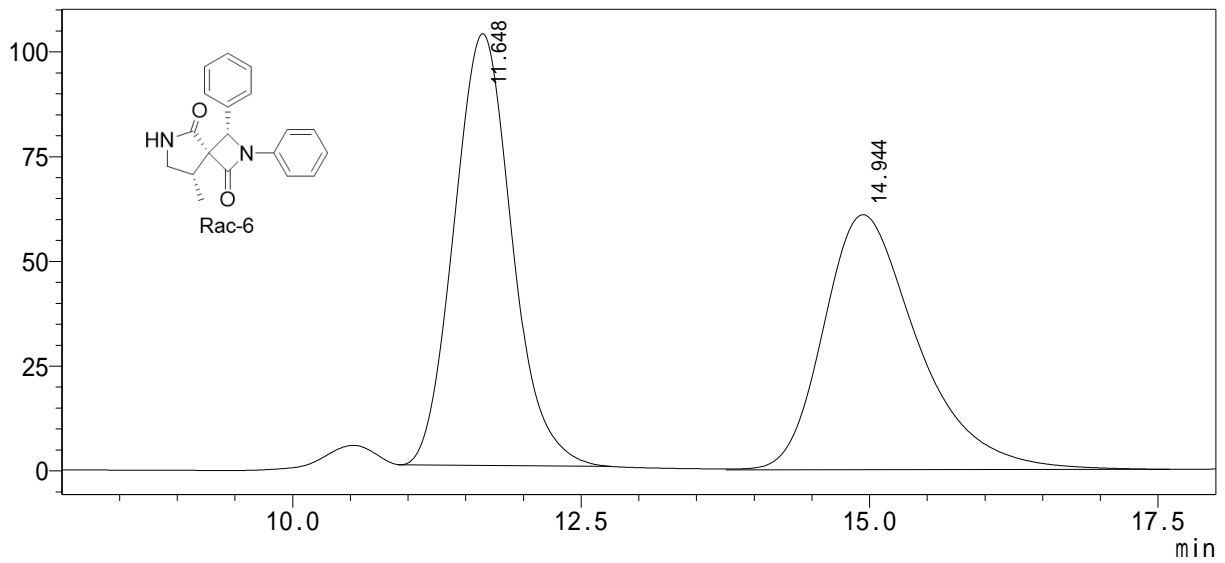

SPD-20A

| Entry | RT[min] | Area    | Height | Area%  |  |   |  |
|-------|---------|---------|--------|--------|--|---|--|
| 1     | 11.648  | 3597603 | 103038 | 50.924 |  | M |  |
| 2     | 14.944  | 3466980 | 60867  | 49.076 |  |   |  |
| Sum   |         | 7064583 | 163905 |        |  |   |  |



SHIMADZU

LabSolutions

# HPLC Reprot

## <Sample Information>

Sample name : LSY-1210-450-S-AS20%-3  
Data name : LSY-1210-450-S-AS20%-3.lcd  
Acq. name : AS-H-20%.lcm  
Location : 1-1  
Sample Type : unknown  
Ana. Date : 2023/12/10 14:23:22  
Pro. Date : 2024/5/9 15:44:24  
Analyst : System Administrator  
Processor : System Administrator

mV

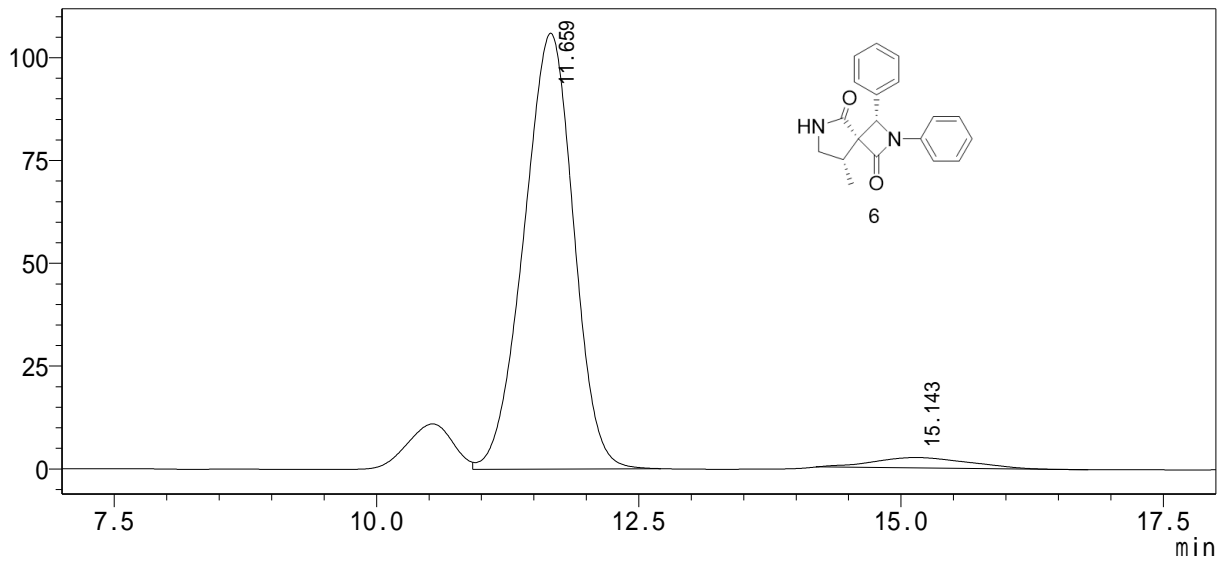

SPD-20A

| Entry | RT[min] | Area    | Height | Area%  |  |   |
|-------|---------|---------|--------|--------|--|---|
| 1     | 11.659  | 3501159 | 105996 | 95.576 |  | M |
| 2     | 15.143  | 162067  | 2539   | 4.424  |  | M |
| Sum   |         | 3663226 | 108534 |        |  |   |
